# Supplementary material
Source: Research Square preprint supplement (doi:10.21203/rs.3.rs-8860995/v1)

# Supplementary methods

## Sample processing

Fresh frozen tumor samples were retrieved from PDS, IDS, pre-NACT laparoscopy, drained ascites or pleural fluid, or occasional palliative relapse operations, as previously described (Lahtinen, 2023). The tumor samples were snap-frozen in liquid nitrogen without delay in the surgical unit.

DNA and RNA were extracted from the fresh-frozen tumor samples and submitted to genome-wide sequencing with either DNBSEQ (BGISEQ-500 RRID: SCR_017979 or MGISEQ-2000 RRID: SCR_017980), HiSeq X Ten (RRID: SCR_016385), or NovaSeq 6000 (RRID: SCR_016387), as previously described (Micoli, 2025; Afenteva, 2025). Patient-specific germline references were retrieved by whole-genome sequencing of DNA extracted from peripheral blood samples.

## Genomic sequencing data analysis

### Sequencing data preprocessing

Sequenced read data were processed using Anduril 2 as previously described (Cervera, 2019, Lahtinen, 2023) with additional adapter read filtering. Briefly, we filtered read pairs where the read or mate led with CGGTGGT/CGTATGC exactly or CGGTGGTCG/CGTATGCCG with one mismatch from samples where at least 0.1% of the reads would be filtered. Read data were then trimmed using Trimmomatic 0.32 (Bolger, 2014) and aligned against genome build GRCh38.d1.vd1 with BWA-MEM 0.7.12-r1039 (Li, 2013). This was followed by duplicate marking using Picard 2.6 (https://github.com/broadinstitute/picard) and base quality score recalibration using GATK 3.7 (Van der Auwera & O'Connor, 2020). We proceeded with normal samples with less than 10% and tumor samples with less than 3% contamination as estimated using GATK 4.1.9.0 and additionally VerifyBamID 2 (Zhang, 2020) for normals.

### Variant calling and annotation pipeline

Somatic variants were called in joint calling mode using GATK 4.1.9.0 Mutect2 against a patient-specific germline reference sample and a Panel of Normals as previously described (Lahtinen, 2023). We applied the additional filters used in signature analysis (Lahtinen et al.) and further excluded multi-nucleotide variants if any of their nested SNVs were uncallable by Mutect2. Furthermore, for batches highly enriched with C>T artefacts, at GCA/GCC and exhibiting orientation bias, we applied additional patient-specific filtering using ROQ annotations from customized runs of GATK FilterMutectCalls, involving sample-wise recomputed F1R2 counts and subsequent orientation models of tumor samples from affected batches. For driver event analysis, we also dropped variants flagged by GATK FilterAlignmentArtifacts. Furthermore, for batches highly enriched with C>T artefacts, at GCA/GCC and exhibiting orientation bias, we applied additional patient-specific filtering using ROQ annotations from customized runs of GATK FilterMutectCalls, involving sample-wise recomputed F1R2 counts and subsequent orientation models of tumor samples from affected batches. Germline variants were called via joint genotyping using GATK 4.1.9.0. Allele dosage of germline variants in tumor samples was estimated patient-wise by forced calling using Mutect2 in joint calling mode. We applied variant annotations using ANNOVAR 20250302 (Wang, 2010), and used MANE v1.4 (Morales, 2023) for gene-based annotations.

The pathogenicity of missense aberrations was estimated with CGI (Tamborero, 2018), AlphaMissense (Cheng, 2023), PolyPhen2 (Adzhubei, 2013), and SIFT (Vaser, 2016). If an aberration was previously characterized and present in the curated ClinVar (Landrum, 2025) or OncoKB (Chakravarty, 2017) databases, this annotation overruled in silico predictions. In other cases, pathogenicity was based on consensus calling of the predictor algorithms, so that a missense was considered potentially pathogenic if it was called oncogenic by CGI output or deleterious by two of the remaining three algorithms. The effect on splicing was estimated with dbscSNV 1.1 (Jian, 2014) and aberrations with ADA or RF score exceeding the threshold value 0.95 were considered potential splice-aberrations. Insertions, deletions, and nonsense mutations were always considered potentially pathogenic. Frameshift and nonsense aberrations were evaluated further only for tumor suppressor genes.

We determined HRD status based on ovaHRDscar, which is used in HGSC clinical diagnostics in Finland (Perez-Villatoro, 2022).

### Copy-number calling

We performed copy-number segmentation using GATK version 4.1.4.1 (DePristo, 2011), and estimated tumor purity, ploidy, allele-specific copy numbers and purified logR values with a reimplementation of the ASCAT algorithm (Van Loo, 2010), as detailed in Lavikka, 2024. GATK-ASCAT output was used for detection of an amplification, using a threshold value of purified log-ratio high than 2.5, corresponding to a gene copy number approximately three times the cancer cell ploidy, and estimated copy number of at least eight. A genomic segment was considered deleted if the purified logR was lower than –2. Deletions were considered unreliable in cancer samples with tumor fraction below 0.2 and these were not used in further analyses.

### Structural aberration calling

Structural variant calling was carried out using GRIDSS (Cameron, 2017 II) in combination with the HMF toolkit (Priestley, 2019). Somatic variants were filtered with GRIPSS, using a Panel of Normals from DECIDER and Dutch population blood samples, and excluding regions listed in the ENCODE and DECIDER blacklists, as previously explained (Micoli, 2025). GRIDSS output was considered only for the detection of structural aberrations, not for the detection of amplifications or large deletions. The gene-level consequences of the somatic structural aberrations were annotated based on transcripts in GENCODE v47, using custom code, and only aberrations causing a change in a gene coding region were retained for further analyses.

### Variant curation

The characterization and targeted exploration of DNA alterations involved joint visualization of mutations, copy-number segments, and structural aberrations at cohort and patient levels using GenomeSpy (Lavikka, 2024). Subsequent data management, analyses, and visualizations were performed in R environment for statistical computing (R Core Team, 2023).

## RNA sequencing data analysis

### RNA processing, decomposition, and normalization

RNA sequencing data were processed with Anduril 2 using the SePIA pipeline (Icay, 2016), including Trimmomatic (Bolger, 2014), STAR aligner (Dobin, 2013), and eXpress (Roberts, 2013). Tumor cell-specific expression was decomposed with PRISM (Häkkinen, 2021). For estimation of an amplification-driven gene hyperexpression, the expression matrix was normalized with variance stabilizing transformation, using the R library DESeq2 (Love, 2014).

### Single-nucleotide variant calling

Patient-specific somatic missense variants were force-called in all RNA sequencing samples from the same patient with the GATK function ASEReadCounter. Variant alleles with at least five supporting sequencing reads in RNA data were considered expressed.

### Fusion analysis

Gene fusion events were detected in RNA-seq data using the nf-core/rnafusion pipeline v. 2.0.0 (Ewels, 2020), which integrates Arriba v2.2.1 (Uhrig, 2021), STAR-Fusion v1.10.1, (Haas, 2019), Pizzly v0.37.3 (Melsted, 2017), and Squid v1.5 (Ma, 2018) with default parameters.

To ensure the identification of biologically relevant and transcribed fusion transcripts with the potential to exert specific effects, stringent criteria were applied. Specifically, only gene fusions supported by a minimum of five reads were included in the analysis. Fusion transcripts consisting of opposite orientation fusion partners of gene 3’ ends were excluded, as well as fusions where both partners were out-of-frame. Fusion transcripts involving only one protein-coding gene in open reading frame were annotated as truncated transcripts coding an abnormal protein. Intra-genic fusions were annotated for the reading frame status and used in validation of intra-genic large deletions and duplications.

### **Transcriptional footprint analysis**

The transcriptional impact of the recurring driver aberrations in *NF1*, *CCNE1*, *PTEN*, *AKT2*, *PTK2*, and *KRAS* were studied with a PROGENy analysis of differential pathway activity (Schubert, 2018) and CollecTRI analysis of transcription factor activity (Müller-Dott, 2023) using the Python package decoupler (Badia-I-Mompel, 2022). For the analysis, we selected one representative tumor sample per patient, prioritizing solid tumor samples from metastatic sites with the highest fraction of tumor cells. Analysis of differential expression was conducted with pydeseq2 (Muzellec, 2023), where the aberration-specific contrasts of differential gene expression were obtained from a multivariable model:

Expression ~ *NF1* + *CCNE1* + *PTEN* + *AKT2* + *PTK2* + *KRAS*

where each covariate was a dichotomous status of the gene in the sample, as follows: *NF1* normal/loss, *CCNE1* normal/amplified, *PTEN* normal/loss, *AKT2* normal/amplified, *PTK2* normal/amplified, *KRAS* normal/amplified.

## Assembly of drug target and biomarker data

To establish a comprehensive listing of available targeted therapies, we collected 388 approved and investigational cancer drugs from Open Targets (Buniello, 2025) and OncoKB (Chakravarty, 2017) databases with their direct physical protein targets (*n =*352) or genes associated with specific sensitivity (*n =*36). From the Open Targets Platform release 24.03, we downloaded the following data objects on 2024-05-29: “Drug - indications” and “Drug - mechanism of action”. These datasets were integrated using ChEMBL IDs as a common identifier. To refine our selection, we filtered drugs based on MONDO_0004992, an ontology term specifically describing cancer, and further filtered to exclude anti-microbiological drugs, generic chemotherapies, including all drugs approved prior to the year 1990, withdrawn drugs, and drugs whose development were canceled after Phase I clinical trials. Furthermore, antibody-drug conjugates were excluded, to focus on small molecule targeted inhibitors. OncoKB Version 4.1 data on drugs and biomarker genes and aberrations were downloaded on 2024-12-02.

To enable agnostic mapping of somatic events in cancer, we assembled the drug-target-biomarker connections into a logical network, representing the mechanistic relations between the components (**Figure 1b, Supplementary data 1**). As in the Open Targets Platform, we included in the network all physical protein targets, affected at a comparable concentration scale, and interpreted these as potentially actionable targets. Furthermore, we distinguished between the concept of the physical drug target and the concept of the aberrated biomarker gene. In alignment with the OncoKB database, actionable biomarkers were recorded primarily on a general level, including gene identity and the consequence, either ‘gain’ or ‘loss’, that an aberration in the gene must have to be classified as oncogenic. This approach enabled us to separate the mapping of potential drugs and the prediction of aberration consequence, to carry out a comprehensive analysis of a cancer type with few well-characterized driver aberrations.

**References for Supplementary Methods**

**Afenteva** D, Yu R, Rajavuori A, Salvadores M, Launonen IM, Lavikka K, Zhang K, Pirttikoski A, Marchi G, Jamalzadeh S, Isoviita VM, Li Y, Micoli G, Erkan EP, Falco MM, Ungureanu D, Lahtinen A, Oikkonen J, Hietanen S, Vähärautio A, Sur I, Virtanen A, Färkkilä A, Hynninen J, Muranen TA, Taipale J, Hautaniemi S. Multi-omics analysis reveals the attenuation of the interferon pathway as a driver of chemo-refractory ovarian cancer. Cell Rep Med. 2025 Sep 16;6(9):102316. doi: 10.1016/j.xcrm.2025.102316.

**Badia-I-Mompel** P, Vélez Santiago J, Braunger J, Geiss C, Dimitrov D, Müller-Dott S, Taus P, Dugourd A, Holland CH, Ramirez Flores RO, Saez-Rodriguez J. decoupleR: ensemble of computational methods to infer biological activities from omics data. Bioinform Adv. 2022 Mar 8;2(1):vbac016. doi: 10.1093/bioadv/vbac016.

**Bolger** AM, Lohse M, Usadel B. Trimmomatic: a flexible trimmer for Illumina sequence data. Bioinformatics. 2014 Aug 1;30(15):2114-20. doi: 10.1093/bioinformatics/btu170. Epub 2014 Apr 1.

**Cameron** DL, Schröder J, Penington JS, Do H, Molania R, Dobrovic A, Speed TP, Papenfuss AT. GRIDSS: sensitive and specific genomic rearrangement detection using positional de Bruijn graph assembly. Genome Res. 2017 Dec;27(12):2050-2060. doi: 10.1101/gr.222109.117.

**Cervera** A, Rantanen V, Ovaska K, Laakso M, Nuñez-Fontarnau J, Alkodsi A, Casado J, Facciotto C, Häkkinen A, Louhimo R, Karinen S, Zhang K, Lavikka K, Lyly L, Pal Singh M, Hautaniemi S. Anduril 2: upgraded large-scale data integration framework. Bioinformatics. 2019 Oct 1;35(19):3815-3817. doi: 10.1093/bioinformatics/btz133.

**DePristo** MA**,** Banks E, Poplin R, Garimella KV, Maguire JR, Hartl C, Philippakis AA, del Angel G, Rivas MA, Hanna M, McKenna A, Fennell TJ, Kernytsky AM, Sivachenko AY, Cibulskis K, Gabriel SB, Altshuler D, Daly MJ. A framework for variation discovery and genotyping using next-generation DNA sequencing data. Nat Genet. 2011 May;43(5):491-8. doi: 10.1038/ng.806.

**Dobin** A, Davis CA, Schlesinger F, Drenkow J, Zaleski C, Jha S, Batut P, Chaisson M, Gingeras TR. STAR: ultrafast universal RNA-seq aligner. Bioinformatics. 2013 Jan 1;29(1):15-21. doi: 10.1093/bioinformatics/bts635.

**Ewels** PA, Peltzer A, Fillinger S, Patel H, Alneberg J, Wilm A, Garcia MU, Di Tommaso P, Nahnsen S. The nf-core framework for community-curated bioinformatics pipelines. Nat Biotechnol. 2020 Mar;38(3):276-278. doi: 10.1038/s41587-020-0439-x.

**Haas** BJ, Dobin A, Li B, Stransky N, Pochet N, Regev A. Accuracy assessment of fusion transcript detection via read-mapping and de novo fusion transcript assembly-based methods. Genome Biol. 2019 Oct 21;20(1):213. doi: 10.1186/s13059-019-1842-9.

**Häkkinen** A, Zhang K, Alkodsi A, Andersson N, Erkan EP, Dai J, Kaipio K, Lamminen T, Mansuri N, Huhtinen K, Vähärautio A, Carpén O, Hynninen J, Hietanen S, Lehtonen R, Hautaniemi S. PRISM: recovering cell-type-specific expression profiles from individual composite RNA-seq samples. Bioinformatics. 2021 Sep 29;37(18):2882-2888. doi: 10.1093/bioinformatics/btab178.

**Icay** K, Chen P, Cervera A, Rantanen V, Lehtonen R, Hautaniemi S. SePIA: RNA and small RNA sequence processing, integration, and analysis. BioData Min. 2016 May 20;9:20. doi: 10.1186/s13040-016-0099-z.

**Lavikka** K, Oikkonen J, Li Y, Muranen T, Micoli G, Marchi G, Lahtinen A, Huhtinen K, Lehtonen R, Hietanen S, Hynninen J, Virtanen A, Hautaniemi S. Deciphering cancer genomes with GenomeSpy: a grammar-based visualization toolkit. Gigascience. 2024 Jan 2;13:giae040. doi: 10.1093/gigascience/giae040.

**Li** H. Aligning sequence reads, clone sequences and assembly contigs with BWA-MEM. 2013 arXiv:1303.3997v2 [q-bio.GN].

**Love** MI, Huber W, Anders S. Moderated estimation of fold change and dispersion for RNA-seq data with DESeq2. Genome Biol. 2014;15(12):550. doi: 10.1186/s13059-014-0550-8.

**Ma** C, Shao M, Kingsford C. SQUID: transcriptomic structural variation detection from RNA-seq. Genome Biol. 2018 Apr 12;19(1):52. doi: 10.1186/s13059-018-1421-5.

**Melsted** P, Hateley S, Joseph IC, Pimentel H, Bray N, Pachter L. Fusion detection and quantification by pseudoalignment. BioRxiv, 2017. 166322.

**Micoli** G, Lavikka K, Li Y, Pirttikoski A, Afenteva D, Senkowski W, Marchi G, Vaharautio A, Muranen TA, Joutsiniemi T, Hietanen S, Virtanen A, Wennerberg K, Hynninen J, Oikkonen J, Hautaniemi S. Decoding the Genomic and Functional Landscape of Emerging Subtypes in Ovarian Cancer. Cancer Discov. 2025 Jul 31. doi: 10.1158/2159-8290.CD-25-0652.

**Morales** J, Pujar S, Loveland JE, Astashyn A, Bennett R, Berry A, Cox E, Davidson C, Ermolaeva O, Farrell CM, Fatima R, Gil L, Goldfarb T, Gonzalez JM, Haddad D, Hardy M, Hunt T, Jackson J, Joardar VS, Kay M, Kodali VK, McGarvey KM, McMahon A, Mudge JM, Murphy DN, Murphy MR, Rajput B, Rangwala SH, Riddick LD, Thibaud-Nissen F, Threadgold G, Vatsan AR, Wallin C, Webb D, Flicek P, Birney E, Pruitt KD, Frankish A, Cunningham F, Murphy TD. A joint NCBI and EMBL-EBI transcript set for clinical genomics and research. Nature. 2022 Apr;604(7905):310-315. doi: 10.1038/s41586-022-04558-8.

**Muzellec** B, Teleńczuk M, Cabeli V, Andreux M. PyDESeq2: a python package for bulk RNA-seq differential expression analysis. Bioinformatics. 2023 Sep 2;39(9):btad547. doi: 10.1093/bioinformatics/btad547.

**Perez-Villatoro** F, Oikkonen J, Casado J, Chernenko A, Gulhan DC, Tumiati M, Li Y, Lavikka K, Hietanen S, Hynninen J, Haltia UM, Tyrmi JS, Laivuori H, Konstantinopoulos PA, Hautaniemi S, Kauppi L, Färkkilä A. Optimized detection of homologous recombination deficiency improves the prediction of clinical outcomes in cancer. NPJ Precis Oncol. 2022 Dec 29;6(1):96. doi: 10.1038/s41698-022-00339-8.

**Priestley** P, Baber J, Lolkema MP, Steeghs N, de Bruijn E, Shale C, Duyvesteyn K, Haidari S, van Hoeck A, Onstenk W, Roepman P, Voda M, Bloemendal HJ, Tjan-Heijnen VCG, van Herpen CML, Labots M, Witteveen PO, Smit EF, Sleijfer S, Voest EE, Cuppen E. Pan-cancer whole-genome analyses of metastatic solid tumours. Nature. 2019 Nov;575(7781):210-216. doi: 10.1038/s41586-019-1689-y.

**Roberts** A, Pachter L. Streaming fragment assignment for real-time analysis of sequencing experiments. Nat Methods. 2013 Jan;10(1):71-3. doi: 10.1038/nmeth.2251.

**Uhrig** S, Ellermann J, Walther T, Burkhardt P, Fröhlich M, Hutter B, Toprak UH, Neumann O, Stenzinger A, Scholl C, Fröhling S, Brors B. Accurate and efficient detection of gene fusions from RNA sequencing data. Genome Res. 2021 Mar;31(3):448-460. doi: 10.1101/gr.257246.119.

**Van Loo** P, Nordgard SH, Lingjærde OC, Russnes HG, Rye IH, Sun W, Weigman VJ, Marynen P, Zetterberg A, Naume B, Perou CM, Børresen-Dale AL, Kristensen VN. Allele-specific copy number analysis of tumors. Proc Natl Acad Sci U S A. 2010 Sep 28;107(39):16910-5. doi: 10.1073/pnas.1009843107.

**Wang** K, Li M, Hakonarson H. ANNOVAR: functional annotation of genetic variants from high-throughput sequencing data. Nucleic Acids Res. 2010 Sep;38(16):e164. doi: 10.1093/nar/gkq603.

**Zhang** F, Flickinger M, Taliun SAG; InPSYght Psychiatric Genetics Consortium; Abecasis GR, Scott LJ, McCaroll SA, Pato CN, Boehnke M, Kang HM. Ancestry-agnostic estimation of DNA sample contamination from sequence reads. Genome Res. 2020 Feb;30(2):185-194. doi: 10.1101/gr.246934.118.

**Table S1. Clinical characteristics of the 335 study patients.**

|  | **Category** | ***n*** | **%** |
| --- | --- | --- | --- |
| **Diagnosis year** | 2009-2014 | 40 | 11.9 % |
| 2015-2019 | 141 | 42.1 % |
| 2020-2024 | 154 | 46.0 % |
| **Age at diagnosis** | 35-59 | 47 | 14.0 % |
| 60-69 | 117 | 34.9 % |
| 70-79 | 145 | 43.3 % |
| 80-89 | 26 | 7.8 % |
| **Stage (FIGO 20141)** | IA-IIIB | 34 | 10.1 % |
| IIIC | 203 | 60.6 % |
| IVA-B | 98 | 29.3 % |
| **Treatment strategy** | PDS | 183 | 54.6 % |
| NACT | 152 | 45.4 % |
| **Outcome from primary therapy (RECIST 1.12)** | Complete Response | 175 | 52.2 % |
| Partial Response | 108 | 32.2 % |
| Stable Disease | 12 | 3.6 % |
| Progressive Disease | 23 | 6.9 % |
| ND | 17 | 5.1 % |
| **PFI (IQR)** | 8.6 months (3.9 months - 17.3 months) | | |
| **5-year OS (95% CI)** | 33.7% (28.2% - 40.4%) | | |

PDS: Primary debulking surgery, NACT: Neoadjuvant chemotherapy, PFI: Platinum-free interval, IQR: Interquartile range, OS: Overall survival, CI: Confidence interval

1. Prat J; FIGO Committee on Gynecologic Oncology. Staging classification for cancer of the ovary, fallopian tube, and peritoneum. Int J Gynaecol Obstet. 2014 Jan;124(1):1-5. doi: 10.1016/j.ijgo.2013.10.001.
2. Eisenhauer EA, Therasse P, Bogaerts J, Schwartz LH, Sargent D, Ford R, Dancey J, Arbuck S, Gwyther S, Mooney M, Rubinstein L, Shankar L, Dodd L, Kaplan R, Lacombe D, Verweij J. New response evaluation criteria in solid tumours: revised RECIST guideline (version 1.1). Eur J Cancer. 2009 Jan;45(2):228-47. doi: 10.1016/j.ejca.2008.10.026.

**Table S2. Drug concentrations**

| **Target** | **Compound** | **Concentrations** |
| --- | --- | --- |
| SHP2 | RMC-4550 | 100, 500 nM |
| SOS1 | BI-3406 | 100, 500 nM |
| KRAS | RMC-7977 | 40, 200 nM |
| MEK | cobimetinib | 100, 500 nM |
| ERK | MK-8353 | 100, 500 nM |
| - | carboplatin | Sample-specific |
| PARP | saruparib | 50, 250 nM |
| BCL-2/BCL-XL | navitoclax | 100, 500 nM |
| CDK4/6 | palbociclib | 100, 500 nM |
| PKMYT-1 | RP6306 | 50, 250 nM |
| WEE1 | adavosertib | 30, 150 nM |
| ATR | ceralasertib | 200, 1000 nM |
| CHEK1 | prexasertib | 10, 50 nM |

**Figure S1.** Baseline expression of specific drug target genes in fallopian tube tissue as in the GTEx data.


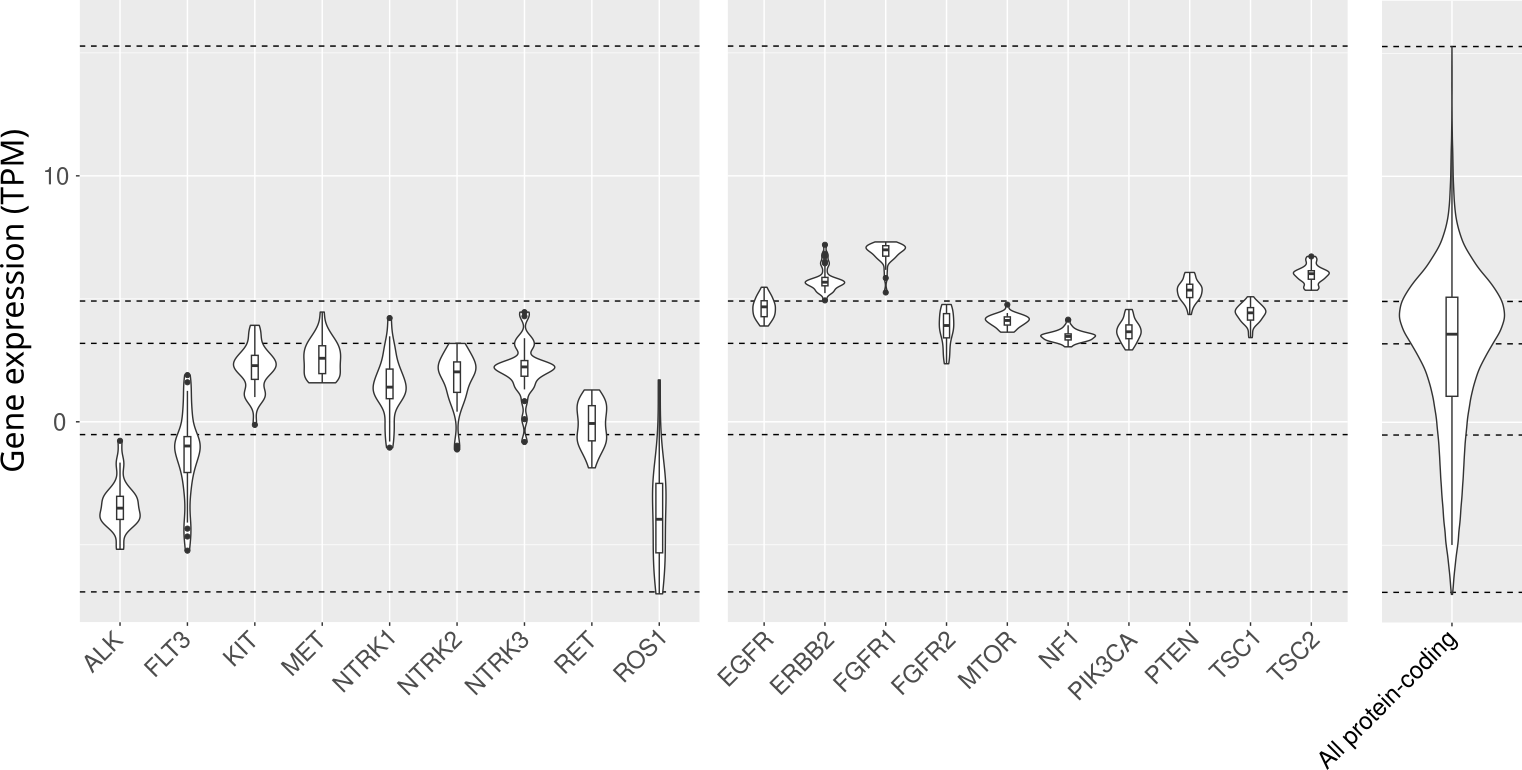
**Figure S2.** Results from the CORNETO analysis of differential gene expression.


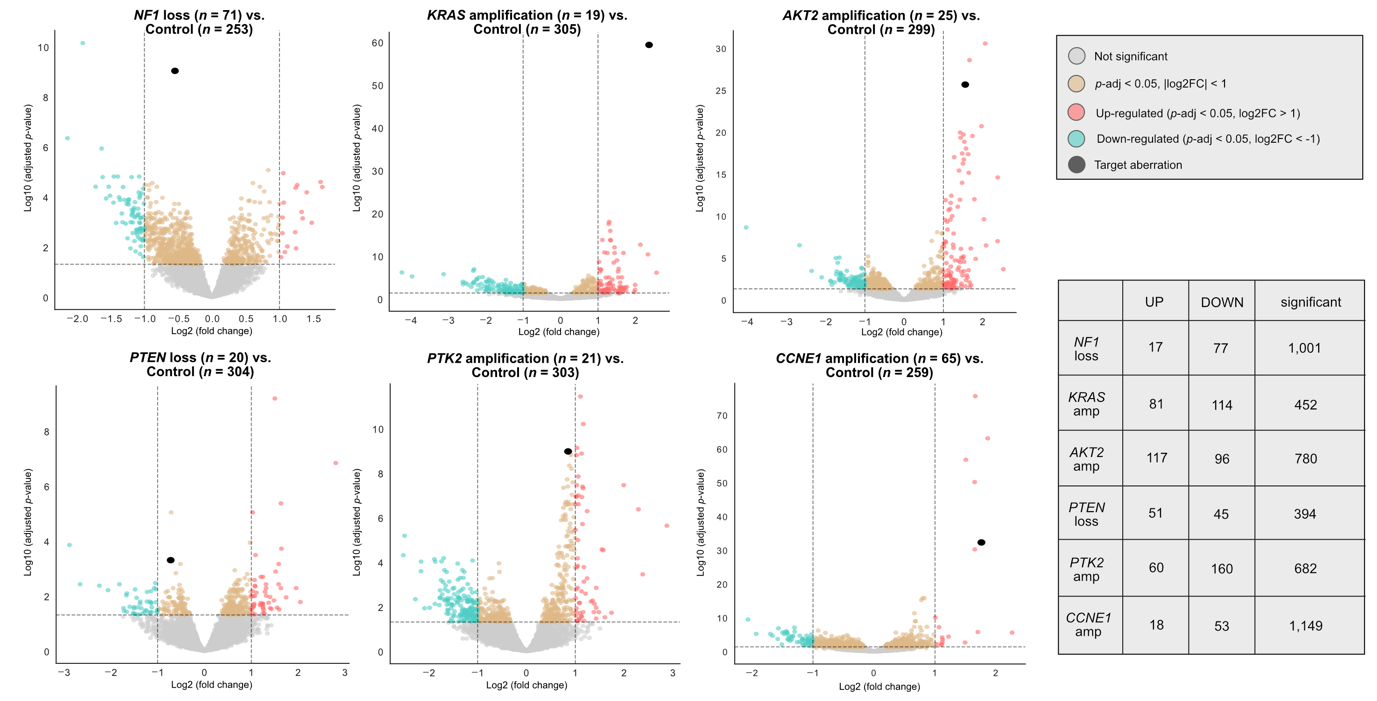

Supplement: Supplementary file 1 [file 016dd20cb316ecbda5e8fffa.docx]
