# Supplementary material
Source: Research Square preprint supplement (doi:10.21203/rs.3.rs-8860995/v1)
Supplement: Supplementary file 2 [file 741fe8b148bb74d56e6176d5.xlsx]

## Sheet: Data_description
Patient	Patient ID
Gene	Gene symbol
Gene.type	Effect which the mutation in the given gene needs to have for oncogenic effect, either gain or loss.
Aberration.name	Aberration name in relation to cDNA or protein
Genomic.position	Aberration genomic coordinates
Consequence	Aberration consequence
CN.normal.range	Range of the number of normal gene copies across tumor samples from the same patient
CN.affected.range	Range of the number of affected gene copies across tumor samples from the same patient
CredOme	Was the aberration found credible in the omental sample, TRUE/FALSE
CredPer	Was the aberration found credible in the peritoneal sample, TRUE/FALSE
CredAdn	Was the aberration found credible in the tubo-ovarian sample, TRUE/FALSE
Relapse	Was the aberration found in a relapse sample, TRUE/FALSE
Allsamples	Was the aberration found in all analyzed samples, TRUE/FALSE
Pathogenic	Was the aberration annotated pathogenic, TRUE/FALSE
Expressed	Was the aberration validated in RNA analysis, TRUE/FALSE
Homogeneous	Did the aberration affect all gene copies, TRUE/FALSE
Tier	Estimated ESCAT Tier of actionability
Drugs	Associated drugs
Credible	Was the aberration considered a credible treatment-guiding biomarker, TRUE/FALSE

## Sheet: Supplementary_data2
Patient	Gene	Gene.type	Aberration.name	Genomic.position	Consequence	CN.normal.range	CN.affected.range	CredOme	CredPer	CredAdn	Relapse	Allsamples	Pathogenic	Expressed	Homogeneous	Tier	Drugs	Credible
EOC1002	CD74	gain	CD74:ENST00000009530:e.8del;CD74:ENST00000009530:e.6_7del;CD74:ENST00000009530:e.6del;CD74:ENST00000009530:e.4del;CD74:ENST00000009530:e.3_4del;CD74:ENST00000009530:e.2_3del;CD74:ENST00000009530:e.1del	chr5:150402252_150402565del;chr5:150402626_150404681del;chr5:150404766_150405084del;chr5:150405181_150406260del;chr5:150406321_150406881del;chr5:150406960_150407152del;chr5:150407325_150412626del	multiple	5	NA	FALSE	FALSE	FALSE	NA	FALSE	TRUE	FALSE	NA	IVB	Repotrectinib	FALSE
EOC1002	CSF1R	gain	PPARGC1B:ENST00000309241:antisense::CSF1R:ENST00000675795:e.2	chr5:149756195::chr5:150109213	fusion_from_unknown	2-3	1-3	FALSE	FALSE	FALSE	NA	FALSE	TRUE	FALSE	NA	IVB	Elzovantinib, Fexagratinib, Pazopanib, Quizartinib, Sunitinib	FALSE
EOC1002	EPHA10	gain	EPHA10:ENST00000373048:e.7_8dup;EPHA10:ENST00000373048:e.2_5dup	chr1:37725031_37733221dup;chr1:37753157_37763233dup	multiple	0-1	2-3	FALSE	FALSE	FALSE	NA	FALSE	TRUE	FALSE	NA	IVB	Vandetanib	FALSE
EOC1002	EPHA5	gain	intergenic::EPHA5:ENST00000613740:e.17	chr4:65314145::chr4:65330425	fusion_from_unknown	4	1	FALSE	FALSE	FALSE	NA	FALSE	TRUE	FALSE	NA	IVB	Vandetanib	FALSE
EOC1002	FN1	gain	FN1:ENST00000354785:e.38_39del;FN1:ENST00000354785:e.32_34del	chr2:215373411_215375214del;chr2:215379317_215382212del	multiple	4	0	FALSE	FALSE	FALSE	NA	FALSE	TRUE	FALSE	NA	X	L19SIP 131I	FALSE
EOC1002	IDH2	gain	IDH2:ENST00000330062:e.1::CRTC3:ENST00000268184:antisense;CRTC3:ENST00000268184:antisense::IDH2:ENST00000330062:e.2	chr15:90098453::chr15:90567275;chr15:90099735::chr15:90566903	multiple	0-3	0-3	FALSE	FALSE	FALSE	NA	TRUE	TRUE	FALSE	NA	IIIB	Enasidenib, Vorasidenib	FALSE
EOC1002	KDM6A	loss	KDM6A:NM_001291415.2:exon27:c.3991C>T:p.R1331X	chrX:45090821C>T	stopgain	NA	NA	TRUE	TRUE	TRUE	NA	TRUE	TRUE	NA	TRUE	IVA	Tazemetostat	TRUE
EOC1002	MSTN	gain	MSTN:amp	NA	amplification	4-5	8-9	FALSE	FALSE	FALSE	NA	TRUE	FALSE	NA	NA	X	Landogrozumab	FALSE
EOC1002	NF1	loss	NF1:ENST00000358273:e.1_51del;NF1:ENST00000358273:e.12::intergenic	chr17:31090122_31353118del;chr17:31212327::chr17:41086203	multiple	0-1	3-4	TRUE	TRUE	TRUE	NA	TRUE	TRUE	NA	TRUE	IIIA	Selumetinib	TRUE
EOC1002	PARP2	gain	CCNB1IP1:ENST00000358932:e.4::PARP2:ENST00000429687:e.2	chr14:20321673::chr14:20335597	fusion	2	0	FALSE	FALSE	FALSE	NA	FALSE	TRUE	FALSE	NA	IVB	Niraparib, Olaparib, Rucaparib, Talazoparib	FALSE
EOC1002	SLC6A4	gain	SLC6A4:amp	NA	amplification	2-5	5-6	FALSE	FALSE	FALSE	NA	FALSE	FALSE	NA	NA	X	Escitalopram	FALSE
EOC1002	TP53	loss	TP53:NM_000546.6:exon6:c.637C>T:p.R213X	chr17:7674894G>A	stopgain	NA	NA	TRUE	TRUE	TRUE	NA	TRUE	TRUE	NA	TRUE	IVA	Adavosertib	TRUE
EOC1003	AURKA	gain	AURKA:NM_198437.3:exon8:c.902T>C:p.I301T	chr20:56370612A>G	nonsynonymous_SNV	NA	NA	TRUE	FALSE	TRUE	NA	TRUE	TRUE	TRUE	NA	X	Alisertib, AMG-900, ENMD-2076, ENMD-981693, Ilorasertib, Tozasertib	TRUE
EOC1003	AURKC	gain	AURKC:amp	NA	amplification	1-2	2-8	FALSE	FALSE	FALSE	NA	FALSE	FALSE	NA	NA	X	AMG-900, Ilorasertib, Tozasertib	FALSE
EOC1003	BIRC2	gain	BIRC2:amp	NA	amplification	4-5	5	TRUE	FALSE	TRUE	NA	TRUE	TRUE	TRUE	NA	X	Birinapant	TRUE
EOC1003	BIRC3	gain	BIRC3:amp	NA	amplification	4-5	5	FALSE	FALSE	FALSE	NA	TRUE	TRUE	FALSE	NA	X	Birinapant	FALSE
EOC1003	CCDC6	gain	CCDC6:ENST00000263102:e.4_5del	chr10:59807606_59829677del	frameshift_deletion	3	0	FALSE	FALSE	FALSE	NA	FALSE	TRUE	FALSE	NA	X	Pralsetinib, Selpercatinib	FALSE
EOC1003	DDB1	gain	DDB1:amp	NA	amplification	4-5	5-6	TRUE	FALSE	TRUE	NA	TRUE	TRUE	TRUE	NA	X	Lenalidomide, Thalidomide	TRUE
EOC1003	HDAC7	gain	HDAC7:ENST00000080059:e.18::intergenic;HDAC7:ENST00000548080:e.4::intergenic	chr12:47789489::chr16:11861898	truncated_transcripts	3	1	FALSE	FALSE	FALSE	NA	FALSE	TRUE	FALSE	NA	X	Belinostat, CUDC-101, Entinostat, Panobinostat	FALSE
EOC1003	HSP90AA1	gain	HSP90AA1:ENST00000334701:e.3_4del	chr14:102085490_102087425del	frameshift_deletion	3	1	FALSE	FALSE	FALSE	NA	FALSE	TRUE	FALSE	NA	X	Retaspimycin, Retaspimycin Hydrochloride, SNX 5422, Tanespimycin	FALSE
EOC1003	MS4A1	gain	MS4A1:amp	NA	amplification	4-5	5-6	FALSE	FALSE	FALSE	NA	TRUE	FALSE	NA	NA	X	Obinutuzumab, Ocaratuzumab, Ofatumumab, Rituximab	FALSE
EOC1003	NBN	loss	NBN:ENST00000265433:e.5::intergenic	chr8:89971686::chr20:40741143	truncated_transcripts	13	0	FALSE	FALSE	FALSE	NA	FALSE	TRUE	NA	FALSE	IIIA	Talazoparib + Enzalutamide	FALSE
EOC1003	NDUFB9	gain	NDUFB9:amp	NA	amplification	3	6-7	FALSE	FALSE	TRUE	NA	TRUE	TRUE	TRUE	NA	X	Metformin	TRUE
EOC1003	NDUFC2	gain	NDUFC2:amp	NA	amplification	4-5	5-6	TRUE	FALSE	TRUE	NA	TRUE	TRUE	TRUE	NA	X	Metformin	TRUE
EOC1003	RARB	gain	RARB:NM_000965.5:exon4:c.501_502del:p.T168Rfs*4	chr3:25569809GCA>G	frameshift_deletion	NA	NA	FALSE	FALSE	FALSE	NA	TRUE	FALSE	FALSE	NA	X	Tretinoin	FALSE
EOC1003	TP53	loss	TP53:NM_000546.6:exon5:c.406C>T:p.Q136X	chr17:7675206G>A	stopgain	NA	NA	TRUE	FALSE	TRUE	NA	TRUE	TRUE	NA	TRUE	IVA	Adavosertib	TRUE
EOC1003	VEGFA	gain	VEGFA:amp	NA	amplification	1	3-11	FALSE	FALSE	FALSE	NA	FALSE	FALSE	NA	NA	X	Bevacizumab	FALSE
EOC1005	EPHA8	gain	EPHA8:NM_020526.5:exon3:c.412C>T:p.Q138X	chr1:22576469C>T	stopgain	NA	NA	FALSE	FALSE	FALSE	NA	FALSE	FALSE	FALSE	NA	X	Vandetanib	FALSE
EOC1005	FGFR3	gain	FGFR3:ENST00000440486:e.17::intergenic	chr4:1807058::chr4:9057433	truncated_transcripts	1	1	FALSE	FALSE	FALSE	NA	FALSE	TRUE	FALSE	NA	X	AZD-4547, Brivanib, Brivanib Alaninate, Dovitinib, ENMD-2076, ENMD-981693, Erdafitinib, Fexagratinib, Futibatinib, Infigratinib, Pazopanib, Pemigatinib, Rogaratinib, XL-999	FALSE
EOC1005	MTOR	gain	MTOR:NM_004958.4:exon49:c.6814G>A:p.A2272T	chr1:11121365C>T	nonsynonymous_SNV	NA	NA	TRUE	TRUE	FALSE	NA	TRUE	TRUE	TRUE	NA	IIIB	Everolimus	TRUE
EOC1005	TEK	gain	TEK:ENST00000380036:e.1::MRPS22:ENST00000680020:e.6;MRPS22:ENST00000680020:e.8::TEK:ENST00000380036:e.2	chr3:139352750::chr9:27112768;chr3:139357046::chr9:27112787	balanced_translocation	1	1	FALSE	FALSE	FALSE	NA	FALSE	TRUE	FALSE	NA	IVB	Regorafenib, Vandetanib	FALSE
EOC1005	TP53	loss	TP53:NM_000546.6:exon7:c.742C>T:p.R248W	chr17:7674221G>A	nonsynonymous_SNV	NA	NA	TRUE	TRUE	FALSE	NA	TRUE	TRUE	NA	TRUE	IVA	Adavosertib	TRUE
EOC1010	FLT3	gain	AGBL4:ENST00000371839:e.6::FLT3:ENST00000241453:e.16;FLT3:ENST00000241453:e.15::AGBL4:ENST00000371839:e.7	chr1:48818704::chr13:28030572;chr1:48818674::chr13:28030541	balanced_translocation	1	1	FALSE	FALSE	FALSE	NA	FALSE	TRUE	FALSE	NA	IIIB	Gilteritinib, Midostaurin + High Dose Chemotherapy, Quizartinib, Sorafenib	FALSE
EOC1010	HSP90AB1	gain	HSP90AB1:amp	NA	amplification	3-4	4	FALSE	FALSE	FALSE	NA	FALSE	TRUE	TRUE	NA	X	Retaspimycin, Retaspimycin Hydrochloride, SNX 5422, Tanespimycin	TRUE
EOC1010	NRG1	gain	intergenic::NRG1:ENST00000405005:e.2	chr1:23935149::chr8:32216279	fusion_from_unknown	2-4	2-4	FALSE	FALSE	FALSE	NA	TRUE	TRUE	FALSE	NA	II	Zenocutuzumab	FALSE
EOC1010	NRP1	gain	ANKRD26:ENST00000376087:antisense::NRP1:ENST00000374867:e.10;NRP1:ENST00000374867:e.9::PARD3:ENST00000374788:e.3	chr10:27041661::chr10:33212080;chr10:33211430::chr10:34637568	balanced_translocation	4	1	FALSE	FALSE	FALSE	NA	TRUE	TRUE	FALSE	NA	X	Vesencumab	FALSE
EOC1010	PIK3CD	gain	PIK3CD:NM_005026.5:exon15:c.1832A>G:p.Y611C	chr1:9721464A>G	nonsynonymous_SNV	NA	NA	TRUE	FALSE	TRUE	NA	TRUE	TRUE	TRUE	NA	IVB	AZD8186	TRUE
EOC1010	PIK3R3	gain	PIK3R3:ENST00000262741:e.3::P3R3URF-PIK3R3:ENST00000540385:e.2	chr1:46072689::chr1:46245438	fusion	4	0-1	FALSE	FALSE	TRUE	NA	FALSE	TRUE	TRUE	NA	X	Apitolisib, BGT-226, Dactolisib, Gedatolisib, Omipalisib, PF-04691502, Pictilisib, Pilaralisib, SF-1126, Sonolisib, Voxtalisib	TRUE
EOC1010	TP53	loss	TP53:NM_000546.6:exon5:c.524G>A:p.R175H	chr17:7675088C>T	nonsynonymous_SNV	NA	NA	TRUE	TRUE	TRUE	NA	TRUE	TRUE	NA	TRUE	IVA	Adavosertib	TRUE
EOC1010	VEGFA	gain	VEGFA:amp	NA	amplification	3-4	4	FALSE	FALSE	FALSE	NA	FALSE	FALSE	NA	NA	X	Bevacizumab	FALSE
EOC1011	ATP4A	gain	ATP4A:amp	NA	amplification	3	15	FALSE	FALSE	FALSE	NA	TRUE	FALSE	NA	NA	X	Rabeprazole	FALSE
EOC1011	BRIP1	loss	BRIP1:ENST00000259008:e.14::TBX4:ENST00000644296:antisense	chr17:61456187::chr17:61753755	truncated_transcripts	10	1	FALSE	FALSE	FALSE	NA	TRUE	TRUE	NA	FALSE	IIIA	Olaparib	FALSE
EOC1011	CCNE1	gain	CCNE1:amp	NA	amplification	6	9	FALSE	FALSE	FALSE	NA	TRUE	TRUE	FALSE	NA	IVA	Lunresertib + Camonsertib	FALSE
EOC1011	CD22	gain	CD22:amp	NA	amplification	3	15	FALSE	FALSE	FALSE	NA	TRUE	TRUE	FALSE	NA	X	Epratuzumab	FALSE
EOC1011	HDAC4	gain	HDAC4:ENST00000543185:e.11::intergenic	chr2:238734530::chr2:239131364	truncated_transcripts	7	1	FALSE	FALSE	FALSE	NA	TRUE	TRUE	FALSE	NA	X	Belinostat, CUDC-101, Entinostat, Panobinostat	FALSE
EOC1011	PDGFRA	gain	intergenic::PDGFRA:ENST00000257290:e.22	chr4:54289954::chr4:54411686	fusion_from_unknown	4	1	FALSE	FALSE	FALSE	NA	TRUE	TRUE	FALSE	NA	IIIA	Imatinib	FALSE
EOC1011	PSMD13	gain	PSMD13:NM_002817.4:exon13:c.1085G>T:p.S362I	chr11:252554G>T	nonsynonymous_SNV	NA	NA	FALSE	FALSE	FALSE	NA	TRUE	FALSE	TRUE	NA	X	Bortezomib, Ixazomib, Ixazomib Citrate, Oprozomib	FALSE
EOC1011	PSMD8	gain	PSMD8:amp	NA	amplification	7	16	FALSE	FALSE	FALSE	NA	TRUE	TRUE	FALSE	NA	X	Bortezomib, Ixazomib, Ixazomib Citrate, Oprozomib	FALSE
EOC1011	SF3B1	gain	SF3B1:NM_012433.4:exon5:c.430G>T:p.D144Y	chr2:197418574C>A	nonsynonymous_SNV	NA	NA	FALSE	TRUE	FALSE	NA	TRUE	TRUE	TRUE	NA	IVA	Emavusertib, Ceralasertib	TRUE
EOC1011	TP53	loss	TP53:NM_000546.6:exon5:c.511G>T:p.E171X	chr17:7675101C>A	stopgain	NA	NA	FALSE	TRUE	FALSE	NA	TRUE	TRUE	NA	TRUE	IVA	Adavosertib	TRUE
EOC1015	CCDC6	gain	ANK3:ENST00000280772:e.26::CCDC6:ENST00000263102:e.2;USP34:ENST00000398571:e.1::CCDC6:ENST00000263102:e.2	chr10:59862781::chr10:60110725;chr2:61458649::chr10:59910040	multiple	0	1	FALSE	FALSE	FALSE	NA	TRUE	TRUE	FALSE	NA	IVB	Pralsetinib, Selpercatinib	FALSE
EOC1015	ERBB4	gain	ERBB4:ENST00000342788:e.1_2del	chr2:212084200_212594383del	5prime_deletion	2	1	FALSE	FALSE	FALSE	NA	TRUE	TRUE	FALSE	NA	X	AC-480, Afatinib, BMS-690514, Dacomitinib, Dacomitinib Anhydrous, JNJ-26483327, Neratinib, Poziotinib, Vandetanib	FALSE
EOC1015	EZH2	gain	EZH2:NM_004456.5:exon15:c.1838G>A:p.R613Q	chr7:148813972C>T	nonsynonymous_SNV	NA	NA	FALSE	FALSE	TRUE	NA	TRUE	TRUE	TRUE	NA	IIIA	Tazemetostat	TRUE
EOC1015	GSK3B	gain	GSK3B:ENST00000264235:e.1::CHD7:ENST00000423902:e.3;GSK3B:ENST00000264235:e.1::CHD7:ENST00000423902:antisense;CHD7:ENST00000423902:antisense::GSK3B:ENST00000264235:e.2;CHD7:ENST00000423902:e.2::GSK3B:ENST00000264235:e.2	chr3:120035166::chr8:60768946;chr3:120035099::chr8:60769446;chr3:120035090::chr8:60769445;chr3:120035165::chr8:60768945	multiple	4	NA	FALSE	FALSE	FALSE	NA	TRUE	TRUE	FALSE	NA	X	LY-2090314	FALSE
EOC1015	KDM6A	loss	KDM6A:ENST00000611820:e.2::TRIM69:ENST00000329464:e.2;GOLM2:ENST00000299957:e.2::KDM6A:ENST00000611820:e.3	chr15:44749539::chrX:44920907;chr15:44324349::chrX:44918847	balanced_translocation	1	1	FALSE	FALSE	FALSE	NA	TRUE	TRUE	NA	FALSE	IVA	Tazemetostat	FALSE
EOC1015	MAPK1	gain	intergenic::MAPK1:ENST00000215832:e.2	chr22:21854782::chr22:22188453	fusion_from_unknown	6	1	FALSE	FALSE	FALSE	NA	TRUE	TRUE	FALSE	NA	X	Temuterkib	FALSE
EOC1015	NDUFS6	gain	NDUFS6:ENST00000274137:e.2::intergenic	chr5:1802388::chr18:59403871	truncated_transcripts	5	0	FALSE	FALSE	FALSE	NA	TRUE	FALSE	FALSE	NA	X	Metformin	FALSE
EOC1015	PDE4C	gain	PDE4C:amp	NA	amplification	2	11	FALSE	FALSE	FALSE	NA	TRUE	FALSE	NA	NA	X	Roflumilast	FALSE
EOC1015	PIK3R2	gain	PIK3R2:amp	NA	amplification	2	11	FALSE	FALSE	TRUE	NA	TRUE	TRUE	TRUE	NA	X	Apitolisib, BGT-226, Dactolisib, Gedatolisib, Omipalisib, PF-04691502, Pictilisib, Pilaralisib, SF-1126, Sonolisib, Voxtalisib	TRUE
EOC1015	PPP2R1A	loss	intergenic::PPP2R1A:ENST00000322088:e.2	chr19:52189498::chr19:58397389	fusion_from_unknown	3	1	FALSE	FALSE	FALSE	NA	TRUE	TRUE	NA	FALSE	IVA	Lunresertib + Camonsertib	FALSE
EOC1015	TP53	loss	TP53:NM_000546.6:exon4:c.159_160del:p.W53Cfs*3	chr17:7676208AAC>A	frameshift_deletion	NA	NA	FALSE	FALSE	TRUE	NA	TRUE	TRUE	NA	TRUE	IVA	Adavosertib	TRUE
EOC1017	FGFR3	gain	FGFR3:amp	NA	amplification	1	6-7	TRUE	FALSE	FALSE	FALSE	FALSE	TRUE	TRUE	NA	IVB	Erdafitinib, Fexagratinib, Futibatinib, Pazopanib, Pemigatinib	TRUE
EOC1017	GRIN2B	gain	TOX2:ENST00000341197:e.3::GRIN2B:ENST00000609686:e.11	chr12:13576710::chr20:44013662	fusion	3-5	1	FALSE	FALSE	FALSE	TRUE	FALSE	TRUE	FALSE	NA	X	Memantine	FALSE
EOC1017	NDUFA7	gain	NDUFA7:ENST00000301457:antisense::NDUFA7:ENST00000301457:e.3;NDUFA7:ENST00000301457:antisense::NDUFA7:ENST00000301457:e.2	chr19:8319860::chr19:8331340	fusion_from_unknown	2	1-2	FALSE	FALSE	FALSE	TRUE	TRUE	TRUE	FALSE	NA	X	Metformin	FALSE
EOC1017	NDUFA9	gain	NDUFA9:amp	NA	amplification	2	4-6	FALSE	FALSE	FALSE	FALSE	FALSE	TRUE	TRUE	NA	X	Metformin	TRUE
EOC1017	NDUFB6	gain	NDUFB6:amp	NA	amplification	1	10-11	FALSE	FALSE	FALSE	TRUE	TRUE	FALSE	NA	NA	X	Metformin	FALSE
EOC1017	TEK	gain	TEK:NM_000459.5:exon14:c.2293G>A:p.A765T	chr9:27204994G>A	nonsynonymous_SNV	NA	NA	FALSE	FALSE	FALSE	TRUE	TRUE	FALSE	FALSE	NA	X	Altiratinib, CEP-11981, Foretinib, Glesatinib, Regorafenib, Vandetanib	FALSE
EOC1017	TP53	loss	TP53:NM_000546.6:exon4:c.197_202del:p.M66_E68delinsK	chr17:7676165:CTCTGGCA>T	frameshift_deletion	NA	NA	TRUE	FALSE	FALSE	TRUE	TRUE	TRUE	NA	TRUE	IVA	Adavosertib	TRUE
EOC1022	BCL2	gain	PHLPP1:ENST00000262719:antisense::BCL2:ENST00000333681:e.3	chr18:62896307::chr18:63166019	fusion_from_unknown	2	2	FALSE	FALSE	FALSE	NA	TRUE	TRUE	FALSE	NA	X	Navitoclax, Venetoclax	FALSE
EOC1022	BRAF	gain	BRAF:NM_004333.6:exon16:c.1933G>C:p.V645L,BRAF:NM_001374258.1:exon17:c.2053G>C:p.V685L	chr7:140749346C>G	nonsynonymous_SNV	NA	NA	TRUE	TRUE	FALSE	NA	TRUE	TRUE	TRUE	NA	IIIA	Cobimetinib, Trametinib	TRUE
EOC1022	CD47	gain	CD47:amp	NA	amplification	3-6	6-13	FALSE	FALSE	FALSE	NA	TRUE	FALSE	NA	NA	X	Magrolimab	FALSE
EOC1022	HDAC9	gain	HDAC9:ENST00000686413:e.22::BCAS3:ENST00000407086:antisense	chr7:18891981::chr17:61177333	truncated_transcripts	4	2	FALSE	FALSE	FALSE	NA	TRUE	TRUE	FALSE	NA	X	Belinostat, CUDC-101, Entinostat, Panobinostat	FALSE
EOC1022	NF1	loss	SEMA4B:ENST00000411539:antisense::NF1:ENST00000358273:e.13;RNF135:ENST00000328381:e.1::NF1:ENST00000358273:e.2	chr15:90214928::chr17:31211384;chr17:30983451::chr17:31097894	balanced_translocation	0	2	TRUE	TRUE	FALSE	NA	TRUE	TRUE	NA	TRUE	IIIA	Selumetinib	TRUE
EOC1022	NRG1	gain	intergenic::NRG1:ENST00000405005:e.2	chr8:31810718::chr8:58200582	fusion_from_unknown	3	1	FALSE	FALSE	FALSE	NA	FALSE	TRUE	FALSE	NA	II	Zenocutuzumab	FALSE
EOC1022	TP53	loss	TP53:NM_000546.6:exon7:c.743G>A:p.R248Q	chr17:7674220C>T	nonsynonymous_SNV	NA	NA	TRUE	TRUE	FALSE	NA	TRUE	TRUE	NA	TRUE	IVA	Adavosertib	TRUE
EOC1023	ADRB2	gain	ADRB2:NM_000024.6:exon1:c.898G>A:p.D300N	chr5:148827729G>A	nonsynonymous_SNV	NA	NA	FALSE	FALSE	FALSE	NA	TRUE	FALSE	FALSE	NA	X	Carvedilol	FALSE
EOC1023	ALK	gain	ALK:NM_004304.5:exon1:c.394G>C:p.V132L	chr2:29920266C>G	nonsynonymous_SNV	NA	NA	FALSE	FALSE	FALSE	NA	TRUE	FALSE	FALSE	NA	X	Alectinib, ASP-3026, Brigatinib, Ceritinib, Crizotinib, Entrectinib, Lorlatinib	FALSE
EOC1023	BRCA1	loss	BRCA1:NM_007294.4:exon10:c.3372C>G:p.F1124L	chr17:43092159G>C	nonsynonymous_SNV	NA	NA	FALSE	FALSE	FALSE	NA	TRUE	FALSE	NA	FALSE	X	Niraparib, Olaparib, Rucaparib, Talazoparib	FALSE
EOC1023	EPHA6	gain	EPHA6:ENST00000389672:e.11del	chr3:97506226_97568872del	inframe_deletion	3	1	FALSE	FALSE	FALSE	NA	TRUE	TRUE	FALSE	NA	IVB	Vandetanib	FALSE
EOC1023	ERBB4	gain	ERBB4:ENST00000342788:e.2_5del	chr2:211746009_212391073del	inframe_deletion	1	1	FALSE	FALSE	FALSE	NA	TRUE	TRUE	FALSE	NA	IVB	Afatinib, Dacomitinib, Neratinib, Poziotinib, Vandetanib	FALSE
EOC1023	FANCL	loss	FANCL:ENST00000233741:e.1::VRK2:ENST00000340157:antisense	chr2:57951374::chr2:58232889;chr2:58021148::chr2:58234786	multiple	3	1	FALSE	FALSE	FALSE	NA	TRUE	TRUE	NA	FALSE	IIIA	Olaparib	FALSE
EOC1023	GRIN2B	gain	GRIN2B:NM_000834.5:exon4:c.709G>T:p.A237S	chr12:13753618C>A	nonsynonymous_SNV	NA	NA	FALSE	FALSE	FALSE	NA	FALSE	TRUE	FALSE	NA	X	Memantine	FALSE
EOC1023	HMGCR	gain	HMGCR:NM_000859.3:exon12:c.1489C>G:p.Q497E	chr5:75354623C>G	nonsynonymous_SNV	NA	NA	FALSE	FALSE	FALSE	NA	TRUE	FALSE	TRUE	NA	X	Atorvastatin, Atorvastatin Calcium, Rosuvastatin, Simvastatin	FALSE
EOC1023	IGF1R	gain	IGF1R:ENST00000650285:e.3_19del	chr15:98796647_98943304del	frameshift_deletion	6	0	FALSE	FALSE	FALSE	NA	FALSE	TRUE	FALSE	NA	X	Cixutumumab, Figitumumab, Ganitumab	FALSE
EOC1023	NDUFB2	gain	NDUFB2:ENST00000247866:e.1::ACSF2:ENST00000300441:antisense;NDUFB2:ENST00000247866:antisense::NDUFB2:ENST00000247866:e.2	chr7:140699766::chr17:50418131;chr7:140698495::chr7:140701428	multiple	3	1	FALSE	FALSE	FALSE	NA	TRUE	TRUE	FALSE	NA	X	Metformin	FALSE
EOC1023	NDUFB4	gain	intergenic::NDUFB4:ENST00000184266:e.2;NDUFB4:ENST00000184266:e.1::intergenic	chr3:120600723::chr18:32589863;chr3:120600684::chr18:32589647	balanced_translocation	6	1	FALSE	FALSE	FALSE	NA	TRUE	TRUE	FALSE	NA	X	Metformin	FALSE
EOC1023	NDUFB9	gain	NDUFB9:amp	NA	amplification	4	5	TRUE	FALSE	FALSE	NA	TRUE	TRUE	TRUE	NA	X	Metformin	TRUE
EOC1023	NF1	loss	NF1:NM_001042492.3:exon40:c.5908_5909del:p.R1970Sfs*6	chr17:31334932AAG>A	frameshift_deletion	NA	NA	TRUE	FALSE	TRUE	NA	TRUE	TRUE	NA	TRUE	IIIA	Selumetinib	TRUE
EOC1023	PIK3CA	gain	PIK3CA:ENST00000263967:e.2_6del	chr3:179187671_179205158del	inframe_deletion	5	1	FALSE	FALSE	FALSE	NA	TRUE	TRUE	FALSE	NA	IIIA	Inavolisib + Palbociclib + Fulvestrant, Alpelisib + Fulvestrant, Capivasertib + Fulvestrant	FALSE
EOC1023	PIK3CG	gain	PIK3CG:NM_001282426.2:exon2:c.417G>T:p.Q139H	chr7:106867978G>T	nonsynonymous_SNV	NA	NA	FALSE	FALSE	FALSE	NA	TRUE	FALSE	FALSE	NA	X	Apitolisib, BGT-226, Dactolisib, Duvelisib, Gedatolisib, Omipalisib, PF-04691502, Pictilisib, Pilaralisib, SF-1126, Sonolisib, Voxtalisib	FALSE
EOC1023	PTK2	gain	PTK2:amp	NA	amplification	4	5	TRUE	FALSE	FALSE	NA	TRUE	TRUE	TRUE	NA	X	Defactinib, GSK-2256098	TRUE
EOC1023	TEK	gain	intergenic::TEK:ENST00000380036:e.2;TEK:ENST00000380036:e.1::intergenic	chr9:27139304::chrX:109207500;chr9:27139281::chrX:109207193	balanced_translocation	1-2	2-3	FALSE	FALSE	FALSE	NA	TRUE	TRUE	FALSE	NA	IVB	Regorafenib, Vandetanib	FALSE
EOC1023	TP53	loss	TP53:NM_000546.6:exon10:c.1016_1019del:p.E339Gfs*5	chr17:7670689CATCT>C	frameshift_deletion	NA	NA	TRUE	FALSE	TRUE	NA	TRUE	TRUE	NA	TRUE	IVA	Adavosertib	TRUE
EOC1023	XPO1	gain	XPO1:ENST00000401558:e.4::USP34:ENST00000398571:e.44	chr2:61265330::chr2:61521019	fusion	4	1	TRUE	FALSE	FALSE	NA	TRUE	TRUE	TRUE	NA	X	Selinexor	TRUE
EOC1026	CCNE1	gain	CCNE1:amp	NA	amplification	2	37	FALSE	FALSE	TRUE	NA	TRUE	TRUE	TRUE	NA	IVA	Lunresertib + Camonsertib	TRUE
EOC1026	EGFR	gain	EGFR:NM_005228.5:exon7:c.858C>A:p.S286R	chr7:55154121C>A	nonsynonymous_SNV	NA	NA	FALSE	FALSE	TRUE	NA	TRUE	TRUE	TRUE	NA	IIIB	Erlotinib, Cetuximab, Cetuximab + Chemotherapy, Panitumumab, Panitumumab + Chemotherapy, Afatinib, Amivantamab + Chemotherapy, Amivantamab + Lazertinib, Dacomitinib, Erlotinib + Ramucirumab, Gefitinib, Osimertinib, Osimertinib + Chemotherapy, Amivantamab	TRUE
EOC1026	ESR2	gain	ESR2:ENST00000341099:e.6::CHURC1-FNTB:ENST00000549987:antisense;ESR2:ENST00000341099:e.6::FNTB:ENST00000246166:antisense;FNTB:ENST00000246166:e.1::ESR2:ENST00000341099:antisense	chr14:64250181::chr14:64992494	truncated_transcripts	2	1	FALSE	FALSE	FALSE	NA	TRUE	TRUE	FALSE	NA	X	Fulvestrant	FALSE
EOC1026	HDAC4	gain	HDAC4:ENST00000543185:e.3::intergenic	chr2:238972519::chr2:239222944	truncated_transcripts	4	1	FALSE	FALSE	FALSE	NA	TRUE	TRUE	FALSE	NA	X	Belinostat, CUDC-101, Entinostat, Panobinostat	FALSE
EOC1026	NDUFA2	gain	KY:ENST00000423778:e.3::NDUFA2:ENST00000252102:e.2	chr3:134633162::chr5:140654903	fusion	4	1	FALSE	FALSE	FALSE	NA	TRUE	TRUE	FALSE	NA	X	Metformin	FALSE
EOC1026	NDUFB7	gain	NDUFB7:amp	NA	amplification	2	7	FALSE	FALSE	TRUE	NA	TRUE	TRUE	TRUE	NA	X	Metformin	TRUE
EOC1026	NRAS	gain	NRAS:amp	NA	amplification	2	33	FALSE	FALSE	FALSE	NA	TRUE	FALSE	NA	NA	X	Binimetinib, Cobimetinib, Panitumumab, Ribociclib, Selumetinib, Trametinib	FALSE
EOC1026	PARP1	gain	TMEM63A:ENST00000366835:e.25::PARP1:ENST00000366794:e.2	chr1:225846258::chr1:226410591	fusion	4	3	FALSE	FALSE	FALSE	NA	TRUE	TRUE	FALSE	NA	IVB	Niraparib, Olaparib, Rucaparib, Talazoparib	FALSE
EOC1026	PDE10A	gain	PDE10A:NM_001385079.1:exon21:c.3046C>T:p.P1016S	chr6:165336142G>A	nonsynonymous_SNV	NA	NA	FALSE	FALSE	FALSE	NA	TRUE	FALSE	FALSE	NA	X	PBF-999	FALSE
EOC1026	PDE10A	gain	PDE10A:NM_001385079.1:exon1:c.226A>C:p.S76R	chr6:165662586T>G	nonsynonymous_SNV	NA	NA	FALSE	FALSE	FALSE	NA	TRUE	FALSE	FALSE	NA	X	PBF-999	FALSE
EOC1026	PIK3CA	gain	PIK3CA:NM_006218.4:exon5:c.1031T>G:p.V344G	chr3:179203761T>G	nonsynonymous_SNV	NA	NA	FALSE	FALSE	TRUE	NA	TRUE	TRUE	TRUE	NA	IIIA	Inavolisib + Palbociclib + Fulvestrant, Alpelisib + Fulvestrant, Capivasertib + Fulvestrant	TRUE
EOC1026	TP53	loss	TP53:NM_000546.6:exon5:c.427_428delinsTG:p.V143W	chr17:7675184AC>CA	inframe_substitution	NA	NA	FALSE	FALSE	TRUE	NA	TRUE	TRUE	NA	TRUE	IVA	Adavosertib	TRUE
EOC103	ADRM1	gain	intergenic::ADRM1:ENST00000253003:e.6	chr20:62307379::chr20:62567572	fusion_from_unknown	2	1	FALSE	FALSE	FALSE	FALSE	FALSE	TRUE	FALSE	NA	X	Bortezomib, Ixazomib, Ixazomib Citrate, Oprozomib	FALSE
EOC103	ALK	gain	FAM228B:ENST00000615575:antisense::ALK:ENST00000389048:e.6	chr2:24101072::chr2:29378661	fusion_from_unknown	2-4	1-2	FALSE	FALSE	FALSE	TRUE	FALSE	TRUE	FALSE	NA	IIIA	Crizotinib, Alectinib, Brigatinib, Ceritinib, Lorlatinib	FALSE
EOC103	BLK	gain	BLK:amp	NA	amplification	1-3	1-11	FALSE	FALSE	FALSE	FALSE	FALSE	FALSE	NA	NA	X	Dasatinib, ENMD-981693, Ilorasertib	FALSE
EOC103	BRCA2	loss	BRCA2:NM_000059.4:exon10:c.1258G>T:p.D420Y	chr13:32332736G>T	nonsynonymous_SNV	NA	NA	FALSE	FALSE	FALSE	TRUE	FALSE	FALSE	NA	FALSE	X	Niraparib, Olaparib, Rucaparib, Talazoparib	FALSE
EOC103	CCNE1	gain	CCNE1:ENST00000262643:e.6::SAMD4B:ENST00000610417:e.2	chr19:29818739::chr19:39339133	multiple	3-5	0-1	FALSE	FALSE	FALSE	FALSE	FALSE	TRUE	FALSE	NA	X	Lunresertib	FALSE
EOC103	CDK12	loss	intergenic::CDK12:ENST00000447079:e.6	chr7:100280416::chr17:39496493	fusion_from_unknown	0-2	1-2	FALSE	TRUE	FALSE	TRUE	FALSE	TRUE	NA	TRUE	IIIA	Olaparib, Talazoparib + Enzalutamide	TRUE
EOC103	ESR1	gain	ESR1:ENST00000427531:e.6::ARMT1:ENST00000367294:e.2	chr6:151448713::chr6:152117090	fusion	1	1	FALSE	FALSE	FALSE	FALSE	FALSE	TRUE	FALSE	NA	IIIB	Elacestrant	FALSE
EOC103	GRIN2B	gain	CLEC2A:ENST00000339766:e.4::GRIN2B:ENST00000609686:e.9;GRIN2B:ENST00000609686:e.3::intergenic	chr12:9912482::chr12:13614794;chr12:13844685::chr12:46009953	balanced_translocation	2	1	FALSE	FALSE	FALSE	FALSE	FALSE	TRUE	FALSE	NA	X	Memantine	FALSE
EOC103	KMT2A	gain	intergenic::KMT2A:ENST00000534358:e.32	chr11:118517242::chr11:118696393	fusion_from_unknown	2-3	1	FALSE	FALSE	FALSE	TRUE	FALSE	TRUE	FALSE	NA	IIIA	Revumenib	FALSE
EOC103	MST1R	gain	MST1R:ENST00000296474:e.15_20del	chr3:49887403_49893271del	inframe_deletion	1	0-1	FALSE	FALSE	FALSE	FALSE	FALSE	TRUE	FALSE	NA	X	Glesatinib, MK-8033, Narnatumab	FALSE
EOC103	NOTCH1	gain	NOTCH1:ENST00000651671:e.33::SLC34A3:ENST00000673835:antisense;NOTCH1:ENST00000651671:e.33::TUBB4B:ENST00000340384:antisense	chr9:136498489::chr9:137232711	truncated_transcripts	2-3	1	FALSE	FALSE	FALSE	TRUE	FALSE	TRUE	TRUE	NA	X	Brontictuzumab	TRUE
EOC103	NPM1	loss	NPM1:ENST00000296930:e.4::intergenic	chr5:171392373::chr5:171484069	truncated_transcripts	1	1	FALSE	FALSE	FALSE	FALSE	FALSE	TRUE	NA	FALSE	IIIA	Revumenib	FALSE
EOC103	PDE10A	gain	PDE10A:NM_001385079.1:exon21:c.3041C>T:p.T1014M	chr6:165336147G>A	nonsynonymous_SNV	NA	NA	FALSE	FALSE	FALSE	FALSE	FALSE	FALSE	FALSE	NA	X	PBF-999	FALSE
EOC103	ROS1	gain	intergenic::ROS1:ENST00000368507:e.17	chr6:115725250::chr6:117384652	fusion_from_unknown	1-2	1-2	FALSE	FALSE	FALSE	TRUE	FALSE	TRUE	FALSE	NA	IIIA	Crizotinib, Entrectinib, Repotrectinib, Ceritinib, Lorlatinib	FALSE
EOC103	TP53	loss	TP53:NM_000546.6:exon5:c.400T>C:p.F134L	chr17:7675212A>G	nonsynonymous_SNV	NA	NA	TRUE	TRUE	TRUE	TRUE	TRUE	TRUE	NA	TRUE	IVA	Adavosertib	TRUE
EOC1030	BRCA1	loss	BRCA1:ENST00000357654:e.15::SLC2A9:ENST00000264784:antisense;SLC2A9:ENST00000264784:antisense::BRCA1:ENST00000357654:e.15	chr4:9981866::chr17:43069699;chr4:9982039::chr17:43071947	balanced_translocation	0-1	2	FALSE	FALSE	TRUE	NA	TRUE	TRUE	NA	TRUE	IA	Niraparib, Olaparib, Olaparib + Bevacizumab, Rucaparib	TRUE
EOC1030	CD47	gain	intergenic::CD47:ENST00000361309:e.11	chr3:107847728::chr3:108049038	fusion_from_unknown	3	1-2	FALSE	FALSE	FALSE	NA	TRUE	TRUE	FALSE	NA	X	Magrolimab	FALSE
EOC1030	EPHA1	gain	EXOC4:ENST00000253861:e.3::EPHA1:ENST00000275815:e.17	chr7:133304615::chr7:143392620	fusion	2-4	1	FALSE	FALSE	FALSE	NA	TRUE	TRUE	FALSE	NA	IVB	Vandetanib	FALSE
EOC1030	EPHA5	gain	EPHA5:NM_001281766.3:exon3:c.773T>G:p.V258G	chr4:65601778A>C	nonsynonymous_SNV	NA	NA	FALSE	FALSE	FALSE	NA	TRUE	TRUE	FALSE	NA	IVB	Vandetanib	FALSE
EOC1030	ERBB4	gain	ERBB4:ENST00000342788:e.20dup	chr2:211535152_211571484dup	inframe_duplication	3	1	FALSE	FALSE	FALSE	NA	FALSE	TRUE	FALSE	NA	IVB	Afatinib, Dacomitinib, Neratinib, Poziotinib, Vandetanib	FALSE
EOC1030	HDAC4	gain	HDAC4:NM_001378414.1:exon15:c.2015G>T:p.C672F	chr2:239108147C>A	nonsynonymous_SNV	NA	NA	FALSE	FALSE	TRUE	NA	FALSE	TRUE	TRUE	NA	X	Belinostat, CUDC-101, Entinostat, Panobinostat	TRUE
EOC1030	HDAC6	gain	HDAC6:NM_006044.4:exon11:c.933G>A:p.Q311Q	chrX:48814566G>A	splicing	NA	NA	FALSE	FALSE	FALSE	NA	FALSE	FALSE	FALSE	NA	X	Belinostat, CUDC-101, Entinostat, Panobinostat, Vorinostat	FALSE
EOC1030	ITGAV	gain	intergenic::ITGAV:ENST00000261023:e.13	chr2:176978115::chr2:186641851	fusion_from_unknown	4	1	FALSE	FALSE	FALSE	NA	FALSE	TRUE	FALSE	NA	X	Etaracizumab	FALSE
EOC1030	ITGAV	gain	ITGAV:NM_002210.5:exon22:c.2173G>C:p.A725P	chr2:186666710G>C	nonsynonymous_SNV	NA	NA	FALSE	FALSE	TRUE	NA	FALSE	TRUE	TRUE	NA	X	Etaracizumab	TRUE
EOC1030	ITK	gain	ITK:NM_005546.4:exon2:c.170T>C:p.L57P	chr5:157208920T>C	nonsynonymous_SNV	NA	NA	FALSE	FALSE	FALSE	NA	FALSE	TRUE	FALSE	NA	IVB	Pazopanib	FALSE
EOC1030	NDUFB9	gain	NDUFB9:amp	NA	amplification	2-4	4-6	FALSE	FALSE	TRUE	NA	FALSE	TRUE	TRUE	NA	X	Metformin	TRUE
EOC1030	NF1	loss	EYA2:ENST00000327619:antisense::NF1:ENST00000358273:e.6;NF1:ENST00000358273:e.1_5dup;NF1:ENST00000358273:e.5::EYA2:ENST00000327619:antisense	chr17:31172184::chr20:46890320;chr17:31018598_31172407dup;chr17:31172172::chr20:46890798	multiple	1	NA	FALSE	FALSE	FALSE	NA	FALSE	TRUE	NA	FALSE	IIIA	Selumetinib	FALSE
EOC1030	PDE4A	gain	PDE4A:NM_001111307.2:exon15:c.2407G>C:p.V803L	chr19:10467367G>C	nonsynonymous_SNV	NA	NA	FALSE	FALSE	FALSE	NA	FALSE	FALSE	FALSE	NA	X	Roflumilast	FALSE
EOC1030	PIK3R1	gain	PIK3R1:ENST00000521381:e.2::intergenic	chr5:68232417::chr18:32851894	truncated_transcripts	3	1	FALSE	FALSE	FALSE	NA	FALSE	FALSE	TRUE	NA	X	Apitolisib, BGT-226, Dactolisib, Gedatolisib, Omipalisib, PF-04691502, Pictilisib, Pilaralisib, SF-1126, Sonolisib, Voxtalisib	FALSE
EOC1030	PPP5C	gain	intergenic::PPP5C:ENST00000012443:e.2	chr19:46343363::chr19:46488973	fusion_from_unknown	3	1	FALSE	FALSE	FALSE	NA	FALSE	TRUE	FALSE	NA	X	LB-100	FALSE
EOC1030	PSMC5	gain	PSMC5:ENST00000310144:e.2::FAM20A:ENST00000592554:e.9	chr17:63828765::chr17:68540732	fusion	3	1	FALSE	FALSE	FALSE	NA	FALSE	TRUE	FALSE	NA	X	Bortezomib, Ixazomib, Ixazomib Citrate, Oprozomib	FALSE
EOC1030	PSMD1	gain	PSMD1:ENST00000308696:e.16::PLEKHM3:ENST00000427836:e.3	chr2:207986234::chr2:231098589	fusion	3	1	FALSE	FALSE	TRUE	NA	FALSE	TRUE	TRUE	NA	X	Bortezomib, Ixazomib, Ixazomib Citrate, Oprozomib	TRUE
EOC1030	PTK2	gain	PTK2:NM_001352702.2:exon17:c.1320_1325del:p.Y441_T442del	chr8:140764244GGTGTAA>G	inframe_deletion	NA	NA	FALSE	FALSE	TRUE	NA	FALSE	TRUE	TRUE	NA	X	Defactinib, GSK-2256098	TRUE
EOC1030	TP53	loss	TP53:NM_000546.6:exon6:c.672+2T>C	chr17:7674857A>G	splicing	NA	NA	FALSE	FALSE	TRUE	NA	TRUE	TRUE	NA	TRUE	IVA	Adavosertib	TRUE
EOC1030	TTK	gain	TTK:NM_003318.5:exon15:c.1615_1617del:p.V539del	chr6:80034967CTTTGTTCTACTCTGTAGGTA>C	inframe_deletion	NA	NA	FALSE	FALSE	TRUE	NA	FALSE	TRUE	TRUE	NA	X	BAY-1161909, BAY-1217389	TRUE
EOC1030	TTK	gain	TTK:NM_003318.5:exon14:c.1535C>T:p.S512F	chr6:80031480C>T	nonsynonymous_SNV	NA	NA	FALSE	FALSE	FALSE	NA	FALSE	FALSE	TRUE	NA	X	BAY-1161909, BAY-1217389	FALSE
EOC1032	AR	gain	intergenic::AR:ENST00000374690:e.2;AR:ENST00000374690:e.1::intergenic	chr13:60886542::chrX:67578505;chr13:60886298::chrX:67578516	balanced_translocation	1	1	FALSE	FALSE	FALSE	NA	TRUE	TRUE	FALSE	NA	X	Abiraterone, Apalutamide, Darolutamide, Enzalutamide	FALSE
EOC1032	ERBB4	gain	ERBB4:ENST00000342788:e.28del	chr2:211378636_211381002del	inframe_deletion	2	1	FALSE	FALSE	FALSE	NA	TRUE	TRUE	FALSE	NA	IVB	Afatinib, Dacomitinib, Neratinib, Poziotinib, Vandetanib	FALSE
EOC1032	ESR1	gain	PLEKHA5:ENST00000429027:e.20::ESR1:ENST00000206249:e.3	chr6:151859085::chr12:19328817	fusion	2	0	FALSE	FALSE	FALSE	NA	FALSE	TRUE	FALSE	NA	IIIB	Elacestrant	FALSE
EOC1032	GRIN1	gain	GRIN1:ENST00000371561:e.19::LRRC26:ENST00000371542:antisense	chr9:137166915::chr9:137168876	truncated_transcripts	1	1	FALSE	FALSE	FALSE	NA	TRUE	TRUE	FALSE	NA	X	Memantine	FALSE
EOC1032	GRIN2B	gain	GRIN2B:amp	NA	amplification	1	13-14	FALSE	FALSE	FALSE	NA	TRUE	FALSE	NA	NA	X	Memantine	FALSE
EOC1032	KDM6A	loss	KDM6A:ENST00000611820:e.3_14del	chrX:44887127_45060909del	inframe_deletion	1	0	FALSE	FALSE	FALSE	NA	FALSE	TRUE	NA	FALSE	IVA	Tazemetostat	FALSE
EOC1032	KLRC1	gain	KLRC1:amp	NA	amplification	1	13-14	FALSE	FALSE	FALSE	NA	TRUE	FALSE	NA	NA	X	Monalizumab	FALSE
EOC1032	KRAS	gain	KRAS:amp	NA	amplification	1	7	FALSE	FALSE	FALSE	NA	TRUE	TRUE	TRUE	NA	IVB	Adagrasib, Sotorasib	TRUE
EOC1032	LAG3	gain	LAG3:amp	NA	amplification	1	13-14	FALSE	FALSE	FALSE	NA	TRUE	FALSE	NA	NA	X	Fianlimab, Relatlimab	FALSE
EOC1032	NDUFA9	gain	NDUFA9:amp	NA	amplification	1	13-14	FALSE	TRUE	FALSE	NA	TRUE	TRUE	TRUE	NA	X	Metformin	TRUE
EOC1032	NRAS	gain	NRAS:amp	NA	amplification	1	8	FALSE	FALSE	FALSE	NA	TRUE	FALSE	NA	NA	X	Binimetinib, Cobimetinib, Panitumumab, Ribociclib, Selumetinib, Trametinib	FALSE
EOC1032	NRG1	gain	NRG1:ENST00000405005:e.5::intergenic	chr8:32701602::chr8:33616357	truncated_transcripts	2	0	FALSE	FALSE	FALSE	NA	FALSE	TRUE	FALSE	NA	X	Seribantumab, Zenocutuzumab	FALSE
EOC1032	PDE4D	gain	PDE4D:ENST00000340635:e.4_6del	chr5:58994871_59190376del	inframe_deletion	1	0	FALSE	FALSE	FALSE	NA	FALSE	TRUE	FALSE	NA	X	Roflumilast	FALSE
EOC1032	PSMB5	gain	PSMB5:ENST00000361611:e.2::HAUS4:ENST00000541587:e.2	chr14:22958721::chr14:23030175	fusion	2	0	FALSE	TRUE	FALSE	NA	FALSE	TRUE	TRUE	NA	X	Bortezomib, Ixazomib, Ixazomib Citrate, Marizomib, Oprozomib	TRUE
EOC1032	TP53	loss	TP53:NM_000546.6:exon8:c.818G>A:p.R273H	chr17:7673802C>T	nonsynonymous_SNV	NA	NA	FALSE	TRUE	FALSE	NA	TRUE	TRUE	NA	TRUE	IVA	Adavosertib	TRUE
EOC1034	ERBB4	gain	ERBB4:ENST00000342788:e.2_3dup	chr2:211916393_212301690dup	inframe_duplication	3	1	FALSE	FALSE	FALSE	NA	TRUE	TRUE	FALSE	NA	IVB	Afatinib, Dacomitinib, Neratinib, Poziotinib, Vandetanib	FALSE
EOC1034	ESR1	gain	ESR1:ENST00000206249:e.3::ARMT1:ENST00000367294:e.2;ESR1:ENST00000406599:e.1::ARMT1:ENST00000367294:e.2	chr6:151447683::chr6:151905614	fusion	3	3	FALSE	FALSE	FALSE	NA	TRUE	TRUE	FALSE	NA	IIIB	Elacestrant	FALSE
EOC1034	NDUFA7	gain	NDUFA7:amp	NA	amplification	2	6-7	TRUE	FALSE	FALSE	NA	TRUE	TRUE	TRUE	NA	X	Metformin	TRUE
EOC1034	PARP3	gain	PARP3:NM_001003931.4:exon2:c.140G>A:p.R47H	chr3:51943495G>A	nonsynonymous_SNV	NA	NA	FALSE	FALSE	FALSE	NA	TRUE	FALSE	TRUE	NA	X	Olaparib, Rucaparib, Veliparib	FALSE
EOC1034	SF3B1	gain	ANKRD44:ENST00000282272:e.2::SF3B1:ENST00000335508:e.7	chr2:197159415::chr2:197415867	fusion	4	1	FALSE	FALSE	FALSE	NA	TRUE	TRUE	FALSE	NA	X	Ceralasertib, Emavusertib	FALSE
EOC1034	TP53	loss	TP53:NM_000546.6:exon5:c.517G>A:p.V173M	chr17:7675095C>T	nonsynonymous_SNV	NA	NA	TRUE	TRUE	FALSE	NA	TRUE	TRUE	NA	TRUE	IVA	Adavosertib	TRUE
EOC1037	ALK	gain	ALK:ENST00000389048:e.2del	chr2:29707358_29894812del	inframe_deletion	3	1	FALSE	FALSE	FALSE	NA	TRUE	TRUE	FALSE	NA	IIIB	Lorlatinib, Crizotinib, Alectinib, Brigatinib, Ceritinib	FALSE
EOC1037	BRCA1	loss	BRCA1:NM_007294.4:exon10:c.1445_1446del:p.I482Nfs*7	chr17:43094084TAA>T	frameshift_deletion	NA	NA	FALSE	TRUE	FALSE	NA	TRUE	TRUE	NA	TRUE	IA	Niraparib, Olaparib, Olaparib + Bevacizumab, Rucaparib	TRUE
EOC1037	HDAC5	gain	HDAC5:ENST00000682912:e.3::MSI2:ENST00000284073:antisense	chr17:44099289::chr17:57636479	truncated_transcripts	2	2	FALSE	FALSE	FALSE	NA	TRUE	TRUE	FALSE	NA	X	Belinostat, CUDC-101, Entinostat, Panobinostat	FALSE
EOC1037	KDM6A	loss	KDM6A:ENST00000611820:e.1_2del	chrX:44785177_44876827del	5prime_deletion	2	2	FALSE	FALSE	FALSE	NA	TRUE	TRUE	NA	FALSE	IVA	Tazemetostat	FALSE
EOC1037	NF1	loss	NF1:ENST00000358273:e.9_29del	chr17:31191540_31244608del	frameshift_deletion	0	2	FALSE	TRUE	FALSE	NA	TRUE	TRUE	NA	TRUE	IIIA	Selumetinib	TRUE
EOC1037	TP53	loss	TP53:.	chr17:7675989C>T	splicing	NA	NA	FALSE	TRUE	FALSE	NA	TRUE	TRUE	NA	TRUE	IVA	Adavosertib	TRUE
EOC1038	TP53	loss	TP53:NM_000546.6:exon4:c.295delT:p.S99Pfs*24	chr17:7676073GA>G	frameshift_deletion	NA	NA	FALSE	FALSE	TRUE	NA	TRUE	TRUE	NA	TRUE	IVA	Adavosertib	TRUE
EOC1049	ARAF	gain	ARAF:amp	NA	amplification	1	10-11	FALSE	FALSE	FALSE	NA	TRUE	FALSE	NA	NA	X	Belvarafenib, Cobimetinib, Sorafenib, Tovorafenib, Trametinib	FALSE
EOC1049	CCNE1	gain	CCNE1:amp	NA	amplification	2	17-18	TRUE	TRUE	TRUE	NA	TRUE	TRUE	TRUE	NA	IVA	Lunresertib + Camonsertib	TRUE
EOC1049	CSF1	gain	CSF1:NM_000757.6:exon6:c.1048C>T:p.L350F	chr1:109923669C>T	nonsynonymous_SNV	NA	NA	FALSE	FALSE	FALSE	NA	TRUE	FALSE	TRUE	NA	X	PD-360324	FALSE
EOC1049	FN1	gain	FN1:ENST00000354785:e.45_46del;FN1:ENST00000354785:e.44_45del;FN1:ENST00000354785:e.43_44del;FN1:ENST00000354785:e.43del;FN1:ENST00000354785:e.9_10del	chr2:215361626_215361969del;chr2:215362079_215364879del;chr2:215364985_215365505del;chr2:215365629_215367862del;chr2:215422243_215423350del	multiple	3	NA	FALSE	FALSE	FALSE	NA	FALSE	TRUE	FALSE	NA	X	L19SIP 131I	FALSE
EOC1049	FN1	gain	FN1:NM_212482.4:exon10:c.1468A>C:p.M490L	chr2:215422169T>G	nonsynonymous_SNV	NA	NA	FALSE	FALSE	FALSE	NA	FALSE	FALSE	TRUE	NA	X	L19SIP 131I	FALSE
EOC1049	HDAC6	gain	HDAC6:amp	NA	amplification	1	18-20	TRUE	TRUE	TRUE	NA	TRUE	TRUE	TRUE	NA	X	Belinostat, CUDC-101, Entinostat, Panobinostat, Vorinostat	TRUE
EOC1049	HRAS	gain	HRAS:ENST00000311189:e.5del;HRAS:ENST00000311189:e.4del;HRAS:ENST00000311189:e.3del	chr11:532523_532632del;chr11:532756_533454del;chr11:533613_533767del	multiple	3	NA	FALSE	FALSE	FALSE	NA	FALSE	TRUE	FALSE	NA	X	Tipifarnib	FALSE
EOC1049	KDM6A	loss	APEX2:ENST00000374987:e.3::KDM6A:ENST00000611820:e.3;intergenic::KDM6A:ENST00000611820:e.28;KDM6A:ENST00000611820:antisense::KDM6A:ENST00000611820:e.5	chrX:44938536::chrX:55002670;chr4:10357932::chrX:45104923;chrX:44978643::chrX:44980546	multiple	21-22	NA	FALSE	FALSE	FALSE	NA	TRUE	TRUE	NA	FALSE	IVA	Tazemetostat	FALSE
EOC1049	KIF5B	gain	KIF5B:ENST00000302418:e.21_22del	chr10:32018387_32018502del	frameshift_deletion	3	0	FALSE	FALSE	FALSE	NA	FALSE	TRUE	FALSE	NA	X	Pralsetinib, Selpercatinib	FALSE
EOC1049	MKNK2	gain	MKNK2:ENST00000250896:e.8_9del;MKNK2:ENST00000250896:e.7_8del	chr19:2042662_2042766del;chr19:2042870_2043124del	multiple	1	0	FALSE	FALSE	FALSE	NA	FALSE	TRUE	FALSE	NA	X	Tomivosertib	FALSE
EOC1049	NDUFA13	gain	NDUFA13:ENST00000507754:e.5del	chr19:19527771_19528008del	inframe_deletion	4	1	FALSE	FALSE	FALSE	NA	FALSE	TRUE	FALSE	NA	X	Metformin	FALSE
EOC1049	NDUFA2	gain	NDUFA2:ENST00000252102:e.2del;NDUFA2:ENST00000252102:e.1del	chr5:140645725_140647256del;chr5:140647363_140647484del	multiple	2	0	FALSE	FALSE	FALSE	NA	FALSE	TRUE	FALSE	NA	X	Metformin	FALSE
EOC1049	NDUFS1	gain	NDUFS1:ENST00000233190:e.7_8del	chr2:206147088_206147531del	frameshift_deletion	2	0	FALSE	FALSE	FALSE	NA	FALSE	TRUE	FALSE	NA	X	Metformin	FALSE
EOC1049	NDUFS2	gain	NDUFS2:ENST00000676972:e.10_11del;NDUFS2:ENST00000676972:e.11del;NDUFS2:ENST00000676972:e.12del	chr1:161212480_161213383del;chr1:161213471_161213647del;chr1:161213728_161213863del	multiple	2	NA	FALSE	FALSE	FALSE	NA	FALSE	TRUE	FALSE	NA	X	Metformin	FALSE
EOC1049	NDUFS6	gain	NDUFS6:ENST00000274137:e.1del;NDUFS6:ENST00000274137:e.3del	chr5:1801548_1802320del;chr5:1802375_1814340del	multiple	3	0	FALSE	FALSE	FALSE	NA	FALSE	TRUE	FALSE	NA	X	Metformin	FALSE
EOC1049	NF1	loss	NF1:NM_001042492.3:exon38:c.5485A>G:p.T1829A	chr17:31327715A>G	nonsynonymous_SNV	NA	NA	FALSE	FALSE	FALSE	NA	FALSE	FALSE	NA	FALSE	X	Cobimetinib, Selumetinib, Trametinib	FALSE
EOC1049	NTRK3	gain	PDE8A:ENST00000394553:e.1::NTRK3:ENST00000629765:e.14	chr15:85009123::chr15:88094319	fusion	2-3	1	FALSE	FALSE	FALSE	NA	FALSE	TRUE	FALSE	NA	IC	Entrectinib, Larotrectinib, Repotrectinib	FALSE
EOC1049	PIM2	gain	PIM2:amp	NA	amplification	1	18-20	FALSE	FALSE	FALSE	NA	TRUE	FALSE	NA	NA	X	AZD-1208	FALSE
EOC1049	PPP2CA	gain	PPP2CA:ENST00000481195:e.6_7del	chr5:134197844_134199098del	inframe_deletion	2	0	FALSE	FALSE	FALSE	NA	FALSE	TRUE	FALSE	NA	X	LB-100	FALSE
EOC1049	PPP2R1A	loss	PPP2R1A:NM_014225.6:exon4:c.491C>T:p.A164V	chr19:52211480C>T	nonsynonymous_SNV	NA	NA	FALSE	FALSE	FALSE	NA	TRUE	FALSE	NA	FALSE	X	Lunresertib	FALSE
EOC1049	PPP5C	gain	PPP5C:ENST00000012443:e.1del	chr19:46347216_46353747del	inframe_deletion	3	0	FALSE	FALSE	FALSE	NA	FALSE	TRUE	FALSE	NA	X	LB-100	FALSE
EOC1049	PSMA3	gain	PSMA3:ENST00000216455:e.2del;PSMA3:ENST00000216455:e.3_4del	chr14:58247831_58252118del;chr14:58252242_58257745del	multiple	2	0	FALSE	FALSE	FALSE	NA	FALSE	TRUE	FALSE	NA	X	Bortezomib, Ixazomib, Ixazomib Citrate, Marizomib, Oprozomib	FALSE
EOC1049	PSMB6	gain	PSMB6:ENST00000270586:e.4del;PSMB6:ENST00000270586:e.5del	chr17:4797809_4798007del;chr17:4798152_4798279del	multiple	2	0	FALSE	FALSE	FALSE	NA	FALSE	TRUE	FALSE	NA	X	Bortezomib, Ixazomib, Ixazomib Citrate, Marizomib, Oprozomib	FALSE
EOC1049	PSMB7	gain	PSMB7:ENST00000259457:e.6_7del;PSMB7:ENST00000259457:e.6del;PSMB7:ENST00000259457:e.3_4del	chr9:124356915_124384598del;chr9:124384655_124405316del;chr9:124412492_124413908del	multiple	3	NA	FALSE	FALSE	FALSE	NA	FALSE	TRUE	FALSE	NA	X	Bortezomib, Ixazomib, Ixazomib Citrate, Marizomib, Oprozomib	FALSE
EOC1049	PSMD1	gain	THSD4:ENST00000261862:antisense::PSMD1:ENST00000308696:e.22	chr2:231164739::chr15:71313543	fusion_from_unknown	3-4	1	FALSE	FALSE	FALSE	NA	FALSE	TRUE	FALSE	NA	X	Bortezomib, Ixazomib, Ixazomib Citrate, Oprozomib	FALSE
EOC1049	PSMD14	gain	PSMD14:ENST00000409682:e.7_8del	chr2:161371322_161385464del	frameshift_deletion	2	0	FALSE	FALSE	FALSE	NA	FALSE	TRUE	FALSE	NA	X	Bortezomib, Ixazomib, Ixazomib Citrate, Oprozomib	FALSE
EOC1049	TNC	gain	TNC:amp	NA	amplification	2	6-8	FALSE	FALSE	FALSE	NA	FALSE	FALSE	NA	NA	X	F16SIP 131I	FALSE
EOC1049	TP53	loss	TP53:NM_000546.6:exon8:c.859G>T:p.E287X	chr17:7673761C>A	stopgain	NA	NA	TRUE	TRUE	TRUE	NA	TRUE	TRUE	NA	TRUE	IVA	Adavosertib	TRUE
EOC105	ABL1	gain	ABL1:ENST00000318560:e.4::intergenic	chr2:193655868::chr9:130864118	truncated_transcripts	1-2	1	FALSE	FALSE	FALSE	FALSE	FALSE	TRUE	FALSE	NA	X	Asciminib, Bosutinib, Dasatinib, Imatinib, Imatinib Mesylate, Nilotinib, Ponatinib, Ponatinib Hydrochloride, Regorafenib, Saracatinib	FALSE
EOC105	ATR	loss	ATR:NM_001184.4:exon28:c.4915G>T:p.D1639Y	chr3:142508047C>A	nonsynonymous_SNV	NA	NA	FALSE	FALSE	FALSE	FALSE	FALSE	TRUE	NA	FALSE	IIIA	Talazoparib + Enzalutamide	FALSE
EOC105	AURKA	gain	AURKA:ENST00000395915:e.3::FAM210B:ENST00000371384:antisense	chr20:56364424::chr20:56385592	truncated_transcripts	1-2	1-3	FALSE	FALSE	FALSE	TRUE	FALSE	TRUE	FALSE	NA	X	Alisertib, AMG-900, ENMD-2076, ENMD-981693, Ilorasertib, Tozasertib	FALSE
EOC105	BRCA2	loss	BRCA2:ENST00000380152:e.11del	chr13:32339569_32341869del	inframe_deletion	0-2	1	FALSE	FALSE	FALSE	TRUE	FALSE	TRUE	NA	TRUE	IA	Niraparib, Olaparib, Olaparib + Bevacizumab, Rucaparib	TRUE
EOC105	BRCA2	loss	BRCA2:NM_000059.4:exon11:c.6591_6592del:p.E2198Nfs*4	chr13:32340945CTG>C	frameshift_deletion	NA	NA	TRUE	TRUE	TRUE	FALSE	FALSE	TRUE	NA	TRUE	IA	Niraparib, Olaparib, Olaparib + Bevacizumab, Rucaparib	TRUE
EOC105	CD47	gain	intergenic::CD47:ENST00000361309:e.11	chr3:107934523::chr3:108048924	fusion_from_unknown	4	2	FALSE	FALSE	FALSE	TRUE	FALSE	TRUE	FALSE	NA	X	Magrolimab	FALSE
EOC105	CDKN2A	loss	CDKN2A:ENST00000304494:e.1del	chr9:21974543_21975473del	5prime_deletion	0	1	FALSE	FALSE	TRUE	FALSE	FALSE	TRUE	NA	TRUE	IVA	Abemaciclib, Palbociclib, Ribociclib	TRUE
EOC105	FLT1	gain	MID1:ENST00000317552:antisense::FLT1:ENST00000282397:e.11	chr13:28412316::chrX:10533427	fusion_from_unknown	1	0	FALSE	FALSE	FALSE	FALSE	FALSE	TRUE	FALSE	NA	IVB	Pazopanib, Regorafenib, Sorafenib, Sunitinib, Vandetanib	FALSE
EOC105	GSK3B	gain	GSK3B:ENST00000264235:e.2del	chr3:119986936_120006022del	frameshift_deletion	1	1	FALSE	FALSE	FALSE	FALSE	FALSE	TRUE	FALSE	NA	X	LY-2090314	FALSE
EOC105	ITGAV	gain	ITGAV:ENST00000261023:e.2dup;ITGAV:ENST00000261023:e.2del	chr2:186595074_186611662dup;chr2:186591211_186609040del	multiple	1	1	FALSE	FALSE	FALSE	FALSE	FALSE	TRUE	FALSE	NA	X	Etaracizumab	FALSE
EOC105	NDUFC1	gain	NAA15:ENST00000296543:antisense::NDUFC1:ENST00000394223:e.5	chr4:139292765::chr4:139308902	fusion_from_unknown	1-2	1-2	FALSE	FALSE	FALSE	TRUE	FALSE	TRUE	FALSE	NA	X	Metformin	FALSE
EOC105	NF1	loss	NF1:ENST00000358273:e.4dup	chr17:31162537_31168303dup	frameshift_duplication	0-1	1	FALSE	FALSE	TRUE	FALSE	FALSE	TRUE	NA	TRUE	IIIA	Selumetinib	TRUE
EOC105	PDE4B	gain	intergenic::PDE4B:ENST00000341517:e.4;PDE4B:ENST00000341517:e.3::intergenic	chr1:66096655::chr4:32350619;chr1:66096648::chr4:32350353	balanced_translocation	3	1	FALSE	FALSE	FALSE	TRUE	FALSE	TRUE	FALSE	NA	X	Roflumilast	FALSE
EOC105	PTEN	loss	PTEN:ENST00000371953:e.1del	chr10:87859024_87866588del	5prime_deletion	0	1	FALSE	FALSE	TRUE	FALSE	FALSE	TRUE	NA	TRUE	IIIA	Capivasertib + Fulvestrant	TRUE
EOC105	RET	gain	RET:ENST00000355710:e.1::PARD3:ENST00000374788:antisense	chr10:34658303::chr10:43100199	truncated_transcripts	1	1	FALSE	FALSE	FALSE	FALSE	FALSE	TRUE	FALSE	NA	X	Alectinib, Cabozantinib, Pralsetinib, Quizartinib, Regorafenib, Selpercatinib, Sorafenib, Sorafenib Tosylate, Sunitinib, Sunitinib Malate, Vandetanib	FALSE
EOC105	TP53	loss	TP53:NM_000546.6:exon7:c.742C>T:p.R248W	chr17:7674221G>A	nonsynonymous_SNV	NA	NA	TRUE	TRUE	TRUE	TRUE	TRUE	TRUE	NA	TRUE	IVA	Adavosertib	TRUE
EOC105	TSC1	loss	TSC1:ENST00000298552:e.7_9del	chr9:132911930_132923313del	inframe_deletion	1	0	FALSE	FALSE	FALSE	FALSE	FALSE	TRUE	NA	FALSE	IIIA	Everolimus	FALSE
EOC105	TSC2	loss	TSC2:ENST00000219476:e.17_21del	chr16:2068680_2073382del	inframe_deletion	1	0	FALSE	FALSE	FALSE	FALSE	FALSE	TRUE	NA	FALSE	IIIA	Everolimus	FALSE
EOC105	TTK	gain	TTK:NM_003318.5:exon8:c.859A>G:p.K287E	chr6:80011943A>G	nonsynonymous_SNV	NA	NA	FALSE	FALSE	FALSE	TRUE	FALSE	FALSE	TRUE	NA	X	BAY-1161909, BAY-1217389	FALSE
EOC1051	ADRM1	gain	ADRM1:NM_007002.4:exon5:c.470_471del:p.S158Pfs*83	chr20:62306662CAG>C	frameshift_deletion	NA	NA	FALSE	FALSE	FALSE	NA	FALSE	FALSE	NA	NA	X	Bortezomib, Ixazomib, Ixazomib Citrate, Oprozomib	FALSE
EOC1051	ADRM1	gain	ADRM1:NM_007002.4:exon5:c.475_531del:p.L159_L177del	chr20:62306667CCTGCTGGGAAACATGAGCCACAGCCAGCTCATGCAGCTCATCGGACCAGCCGGCCTT>C	inframe_deletion	NA	NA	FALSE	FALSE	FALSE	NA	FALSE	TRUE	NA	NA	X	Bortezomib, Ixazomib, Ixazomib Citrate, Oprozomib	NA
EOC1051	ADRM1	gain	ADRM1:ENST00000253003:e.5del	chr20:62306664_62306724del	inframe_deletion	2	1	FALSE	FALSE	FALSE	NA	FALSE	TRUE	FALSE	NA	X	Bortezomib, Ixazomib, Ixazomib Citrate, Oprozomib	FALSE
EOC1051	HTR3D	gain	HTR3D:ENST00000428798:e.2::HTR3C:ENST00000318351:e.2	chr3:184035426::chr3:184050766	fusion	2	0-1	FALSE	FALSE	FALSE	NA	TRUE	TRUE	FALSE	NA	X	Ramosetron	FALSE
EOC1051	RAD51C	loss	RAD51C:NM_058216.3:exon1:c.90delG:p.F32Sfs*8	NA	germline	NA	NA	NA	NA	NA	NA	NA	TRUE	NA	TRUE	IIIA	Olaparib, Talazoparib + Enzalutamide	TRUE
EOC1051	RAD51C	loss	RAD51C:ENST00000337432:antisense::COL4A4:ENST00000396625:e.6;COL4A4:ENST00000396625:antisense::RAD51C:ENST00000337432:e.5	chr2:227120986::chr17:58703912	fusion_from_unknown	1	1	FALSE	FALSE	FALSE	NA	TRUE	TRUE	NA	FALSE	IIIA	Olaparib, Talazoparib + Enzalutamide	FALSE
EOC1051	RPS6KB1	gain	RPS6KB1:ENST00000225577:e.1del	chr17:59883980_59893906del	5prime_deletion	2	0	FALSE	FALSE	FALSE	NA	FALSE	TRUE	FALSE	NA	X	LY-2584702	FALSE
EOC1051	TP53	loss	TP53:NM_000546.6:exon5:c.517G>T:p.V173L	chr17:7675095C>A	nonsynonymous_SNV	NA	NA	TRUE	FALSE	TRUE	NA	TRUE	TRUE	NA	TRUE	IVA	Adavosertib	TRUE
EOC1054	CTLA4	gain	CTLA4:NM_005214.5:exon2:c.208C>T:p.R70W	chr2:203870684C>T	nonsynonymous_SNV	NA	NA	FALSE	FALSE	FALSE	NA	FALSE	TRUE	FALSE	NA	X	Cadonilimab, Ipilimumab, Tremelimumab, Zalifrelimab	FALSE
EOC1054	CYP17A1	gain	CYP17A1:NM_000102.4:exon5:c.967C>G:p.Q323E	chr10:102832995G>C	nonsynonymous_SNV	NA	NA	FALSE	FALSE	FALSE	NA	TRUE	FALSE	TRUE	NA	X	Abiraterone, Abiraterone Acetate	FALSE
EOC1054	EPHA6	gain	intergenic::EPHA6:ENST00000389672:e.4;EPHA6:ENST00000389672:e.3::intergenic	chr3:90089140::chr3:97063970;chr3:90085581::chr3:97063965	balanced_translocation	3	1	FALSE	FALSE	FALSE	NA	FALSE	TRUE	FALSE	NA	IVB	Vandetanib	FALSE
EOC1054	HDAC4	gain	HDAC4:ENST00000543185:e.16::LHFPL3:ENST00000424859:e.2	chr2:239102192::chr7:104514042	fusion	2-3	0-2	FALSE	FALSE	FALSE	NA	FALSE	TRUE	FALSE	NA	X	Belinostat, CUDC-101, Entinostat, Panobinostat	FALSE
EOC1054	MAPK11	gain	MAPK11:NM_002751.7:exon1:c.50T>G:p.V17G	chr22:50270243A>C	nonsynonymous_SNV	NA	NA	FALSE	FALSE	FALSE	NA	FALSE	FALSE	FALSE	NA	X	Regorafenib	FALSE
EOC1054	NDUFS4	gain	NDUFS4:amp	NA	amplification	1-2	4-9	FALSE	FALSE	FALSE	NA	FALSE	FALSE	NA	NA	X	Metformin	FALSE
EOC1054	PIK3CG	gain	PIK3CG:ENST00000496166:e.11del	chr7:106906035_106906068del	inframe_deletion	1-2	1-2	FALSE	FALSE	FALSE	NA	FALSE	TRUE	FALSE	NA	X	Apitolisib, BGT-226, Dactolisib, Duvelisib, Gedatolisib, Omipalisib, PF-04691502, Pictilisib, Pilaralisib, SF-1126, Sonolisib, Voxtalisib	FALSE
EOC1054	PSMC1	gain	PSMC1:ENST00000261303:e.10::ZBTB12:ENST00000375527:e.2;STX7:ENST00000367941:antisense::PSMC1:ENST00000261303:e.11	chr6:31910444::chr14:90270512;chr6:132465693::chr14:90270371	balanced_translocation	1-2	1	FALSE	FALSE	FALSE	NA	FALSE	TRUE	FALSE	NA	X	Bortezomib, Ixazomib, Ixazomib Citrate, Oprozomib	FALSE
EOC1054	PSMD14	gain	intergenic::PSMD14:ENST00000409682:e.4	chr2:161320535::chr5:28422941	fusion_from_unknown	1	1	FALSE	FALSE	FALSE	NA	FALSE	TRUE	FALSE	NA	X	Bortezomib, Ixazomib, Ixazomib Citrate, Oprozomib	FALSE
EOC1054	TP53	loss	TP53:NM_000546.6:exon6:c.646G>A:p.V216M	chr17:7674885C>T	nonsynonymous_SNV	NA	NA	FALSE	TRUE	TRUE	NA	TRUE	TRUE	NA	TRUE	IVA	Adavosertib	TRUE
EOC1055	ADRM1	gain	ADRM1:NM_007002.4:exon7:c.725C>G:p.P242R	chr20:62307697C>G	nonsynonymous_SNV	NA	NA	FALSE	FALSE	FALSE	TRUE	FALSE	FALSE	TRUE	NA	X	Bortezomib, Ixazomib, Ixazomib Citrate, Oprozomib	FALSE
EOC1055	BIRC2	gain	BIRC2:amp	NA	amplification	0-1	34-78	TRUE	TRUE	FALSE	TRUE	TRUE	TRUE	TRUE	NA	X	Birinapant	TRUE
EOC1055	BIRC3	gain	BIRC3:amp	NA	amplification	0-1	34-78	TRUE	TRUE	FALSE	TRUE	TRUE	TRUE	TRUE	NA	X	Birinapant	TRUE
EOC1055	BIRC3	gain	OPHN1:ENST00000355520:e.2::BIRC3:ENST00000263464:e.4	chr11:102326239::chrX:68429040	fusion	64	4	FALSE	FALSE	FALSE	TRUE	FALSE	TRUE	FALSE	NA	X	Birinapant	FALSE
EOC1055	CCND1	gain	CCND1:amp	NA	amplification	1-2	10-14	FALSE	FALSE	FALSE	TRUE	TRUE	FALSE	NA	NA	X	Palbociclib	FALSE
EOC1055	EGFR	gain	intergenic::EGFR:ENST00000275493:e.2	chr7:41643820::chr7:55045403	fusion_from_unknown	3	2	FALSE	FALSE	FALSE	TRUE	FALSE	TRUE	FALSE	NA	IIIB	Erlotinib, Cetuximab, Cetuximab + Chemotherapy, Panitumumab, Panitumumab + Chemotherapy, Afatinib, Amivantamab + Chemotherapy, Amivantamab + Lazertinib, Dacomitinib, Erlotinib + Ramucirumab, Gefitinib, Osimertinib, Osimertinib + Chemotherapy, Amivantamab	FALSE
EOC1055	EPHA2	gain	EPHA2:amp	NA	amplification	1	2-8	FALSE	FALSE	FALSE	FALSE	FALSE	FALSE	NA	NA	X	Dasatinib, Regorafenib, Vandetanib	FALSE
EOC1055	EPHA3	gain	EPHA3:ENST00000336596:e.3::intergenic	chr3:80427159::chr3:89224069	truncated_transcripts	3	1	FALSE	FALSE	FALSE	TRUE	FALSE	TRUE	FALSE	NA	X	Vandetanib	FALSE
EOC1055	EPHA5	gain	EPHA5:ENST00000613740:e.7::intergenic	chr4:64540568::chr4:65408013	truncated_transcripts	3	1	FALSE	FALSE	FALSE	TRUE	FALSE	TRUE	FALSE	NA	X	Vandetanib	FALSE
EOC1055	EPHA6	gain	EIF5B:ENST00000289371:antisense::EPHA6:ENST00000389672:e.6	chr2:99372164::chr3:97315275	fusion_from_unknown	4	2	FALSE	FALSE	FALSE	FALSE	FALSE	TRUE	FALSE	NA	IVB	Vandetanib	FALSE
EOC1055	GRIN2B	gain	GRIN2B:amp	NA	amplification	2-3	7-11	FALSE	FALSE	FALSE	TRUE	TRUE	FALSE	NA	NA	X	Memantine	FALSE
EOC1055	IDO1	gain	IDO1:amp	NA	amplification	1-2	20-28	FALSE	FALSE	FALSE	TRUE	TRUE	FALSE	NA	NA	X	Linrodostat	FALSE
EOC1055	KLRC1	gain	KLRC1:amp	NA	amplification	2-3	5-8	FALSE	FALSE	FALSE	FALSE	FALSE	FALSE	NA	NA	X	Monalizumab	FALSE
EOC1055	KRAS	gain	KRAS:amp	NA	amplification	2-3	5-8	TRUE	FALSE	FALSE	FALSE	FALSE	TRUE	TRUE	NA	IVB	Adagrasib, Sotorasib	TRUE
EOC1055	LAG3	gain	LAG3:amp	NA	amplification	2-3	5-9	FALSE	FALSE	FALSE	FALSE	FALSE	FALSE	NA	NA	X	Fianlimab, Relatlimab	FALSE
EOC1055	LYN	gain	LYN:amp	NA	amplification	3-4	8-13	FALSE	FALSE	FALSE	TRUE	TRUE	FALSE	NA	NA	X	Bosutinib, Dasatinib, ENMD-981693, Ilorasertib, JNJ-26483327	FALSE
EOC1055	NDUFB9	gain	NDUFB9:amp	NA	amplification	3	6-21	TRUE	FALSE	FALSE	TRUE	TRUE	TRUE	TRUE	NA	X	Metformin	TRUE
EOC1055	NDUFC2	gain	NDUFC2:amp	NA	amplification	1-2	12-15	TRUE	TRUE	FALSE	TRUE	TRUE	TRUE	TRUE	NA	X	Metformin	TRUE
EOC1055	PDE4B	gain	PDE4B:ENST00000341517:e.9::intergenic	chr1:66357401::chr1:66374943	truncated_transcripts	1-3	1	FALSE	FALSE	FALSE	TRUE	FALSE	TRUE	FALSE	NA	X	Roflumilast	FALSE
EOC1055	PSMD11	gain	intergenic::PSMD11:ENST00000261712:e.2	chr1:96979319::chr17:32445345	fusion_from_unknown	1	1	FALSE	FALSE	FALSE	FALSE	FALSE	TRUE	FALSE	NA	X	Bortezomib, Ixazomib, Ixazomib Citrate, Oprozomib	FALSE
EOC1055	PTK2	gain	PTK2:amp	NA	amplification	3-5	6-12	TRUE	TRUE	FALSE	TRUE	TRUE	TRUE	TRUE	NA	X	Defactinib, GSK-2256098	TRUE
EOC1055	TP53	loss	TP53:NM_000546.6:exon7:c.745A>G:p.R249G	chr17:7674218T>C	nonsynonymous_SNV	NA	NA	TRUE	TRUE	FALSE	TRUE	TRUE	TRUE	NA	TRUE	IVA	Adavosertib	TRUE
EOC1061	HDAC8	gain	HDAC8:ENST00000373573:e.10del	chrX:72330637_72431453del	frameshift_deletion	2	0	FALSE	FALSE	FALSE	NA	FALSE	TRUE	FALSE	NA	X	Belinostat, CUDC-101, Entinostat, Mocetinostat, Panobinostat	FALSE
EOC1061	NDUFA7	gain	NDUFA7:ENST00000301457:e.1::RPS28:ENST00000600659:antisense	chr19:8269395::chr19:8321299	truncated_transcripts	3	1	FALSE	FALSE	FALSE	NA	FALSE	TRUE	FALSE	NA	X	Metformin	FALSE
EOC1061	NDUFV2	gain	MYO10:ENST00000513610:e.25::NDUFV2:ENST00000318388:e.2;NDUFV2:ENST00000318388:e.1::NDUFV2:ENST00000318388:antisense	chr5:16700228::chr18:9102282;chr18:9106107::chr18:9115200	multiple	2	1	FALSE	FALSE	FALSE	NA	FALSE	TRUE	FALSE	NA	X	Metformin	FALSE
EOC1061	NOTCH1	gain	NOTCH1:NM_017617.5:exon25:c.4322C>A:p.P1441H	chr9:136505574G>T	nonsynonymous_SNV	NA	NA	FALSE	FALSE	FALSE	NA	FALSE	FALSE	FALSE	NA	X	Brontictuzumab	FALSE
EOC1061	PRKCB	gain	intergenic::PRKCB:ENST00000643927:e.3	chr16:23955242::chr16:59382831	fusion_from_unknown	3	0	FALSE	FALSE	FALSE	NA	FALSE	TRUE	FALSE	NA	X	Enzastaurin	FALSE
EOC1061	TP53	loss	TP53:NM_000546.6:exon5:c.420delC:p.C141Afs*29	chr17:7675191AG>A	frameshift_deletion	NA	NA	TRUE	TRUE	FALSE	NA	TRUE	TRUE	NA	TRUE	IVA	Adavosertib	TRUE
EOC1063	ADORA2A	gain	RAB6A:ENST00000336083:antisense::ADORA2A:ENST00000337539:e.3	chr11:73739159::chr22:24440516	fusion_from_unknown	3	1	FALSE	FALSE	FALSE	NA	TRUE	TRUE	FALSE	NA	X	Imaradenant, PBF-999	FALSE
EOC1063	AXL	gain	AXL:ENST00000301178:e.6::intergenic	chr19:41234299::chr22:49936388	truncated_transcripts	2	1	FALSE	FALSE	FALSE	NA	TRUE	TRUE	FALSE	NA	X	Gilteritinib	FALSE
EOC1063	EPHA3	gain	intergenic::EPHA3:ENST00000336596:e.3	chr3:89177597::chr11:42543355	fusion_from_unknown	1	1	FALSE	FALSE	FALSE	NA	TRUE	TRUE	FALSE	NA	IVB	Vandetanib	FALSE
EOC1063	HCK	gain	HCK:amp	NA	amplification	1	7	FALSE	FALSE	FALSE	NA	TRUE	FALSE	NA	NA	X	Bosutinib, Dasatinib, ENMD-981693, Ilorasertib	FALSE
EOC1063	IDH2	gain	IDH2:ENST00000330062:e.5::SEMA4B:ENST00000411539:antisense	chr15:90088263::chr15:90220420	truncated_transcripts	2	1	FALSE	FALSE	FALSE	NA	TRUE	TRUE	FALSE	NA	X	Enasidenib, Vorasidenib	FALSE
EOC1063	LCK	gain	intergenic::LCK:ENST00000336890:e.10	chr1:32277547::chr1:33135917	fusion_from_unknown	3	4	FALSE	FALSE	FALSE	NA	TRUE	TRUE	FALSE	NA	IVB	Dasatinib, Pazopanib	FALSE
EOC1063	MET	gain	CFTR:ENST00000003084:e.0::MET:ENST00000397752:e.6	chr7:116745881::chr7:117386650	promoter_hijacking	2	1	FALSE	FALSE	FALSE	NA	TRUE	TRUE	FALSE	NA	X	Altiratinib, AMG-208, AMG-337, Amivantamab, Cabozantinib, Cabozantinib S-Malate, Capmatinib, Crizotinib, Elzovantinib, Emibetuzumab, Foretinib, Glesatinib, Golvatinib, Merestinib, MK-2461, MK-8033, Onartuzumab, Savolitinib, Tepotinib, Tivantinib	FALSE
EOC1063	PSMB7	gain	intergenic::PSMB7:ENST00000259457:e.2	chr9:124416715::chr9:128001580	fusion_from_unknown	1	1	FALSE	FALSE	FALSE	NA	TRUE	TRUE	FALSE	NA	X	Bortezomib, Ixazomib, Ixazomib Citrate, Marizomib, Oprozomib	FALSE
EOC1063	PSMD3	gain	IGFBP4:ENST00000269593:e.1::PSMD3:ENST00000264639:e.3	chr17:39985663::chr17:40446528	fusion	2	2	FALSE	FALSE	FALSE	NA	TRUE	TRUE	FALSE	NA	X	Bortezomib, Ixazomib, Ixazomib Citrate, Oprozomib	FALSE
EOC1063	PTK2B	gain	ALDH7A1:ENST00000637782:e.17::PTK2B:ENST00000346049:e.3	chr5:126533294::chr8:27408287	fusion	2	1	FALSE	FALSE	FALSE	NA	TRUE	TRUE	FALSE	NA	X	Defactinib	FALSE
EOC1063	RBX1	gain	CCDC134:ENST00000255784:e.1::RBX1:ENST00000216225:e.5	chr22:40967888::chr22:41803572	fusion	3	1	FALSE	FALSE	FALSE	NA	TRUE	TRUE	FALSE	NA	X	Lenalidomide, Thalidomide	FALSE
EOC1063	RET	gain	RET:NM_020975.6:exon2:c.236G>A:p.R79Q	chr10:43100621G>A	nonsynonymous_SNV	NA	NA	FALSE	FALSE	FALSE	NA	TRUE	FALSE	TRUE	NA	X	Alectinib, Cabozantinib, Pralsetinib, Quizartinib, Regorafenib, Selpercatinib, Sorafenib, Sorafenib Tosylate, Sunitinib, Sunitinib Malate, Vandetanib	FALSE
EOC1063	TP53	loss	TP53:NM_000546.6:exon6:c.645T>G:p.S215R	chr17:7674886A>C	nonsynonymous_SNV	NA	NA	FALSE	TRUE	FALSE	NA	TRUE	TRUE	NA	TRUE	IVA	Adavosertib	TRUE
EOC1067	AKT2	gain	AKT2:amp	NA	amplification	1-2	4-11	FALSE	FALSE	TRUE	NA	FALSE	TRUE	TRUE	NA	IVB	Capivasertib	TRUE
EOC1067	CDK12	loss	CDK12:ENST00000447079:e.3_5del	chr17:39476354_39500598del	frameshift_deletion	6-18	2-29	FALSE	FALSE	FALSE	NA	FALSE	TRUE	NA	FALSE	IIIA	Olaparib, Talazoparib + Enzalutamide	FALSE
EOC1067	EPHA2	gain	EPHA2:NM_004431.5:exon15:c.2534C>A:p.A845D	chr1:16130361G>T	nonsynonymous_SNV	NA	NA	FALSE	FALSE	TRUE	NA	FALSE	TRUE	TRUE	NA	IVB	Dasatinib, Regorafenib, Vandetanib	TRUE
EOC1067	EPHA3	gain	HTR1F:ENST00000319595:e.2::EPHA3:ENST00000336596:e.14	chr3:87921471::chr3:89432460	fusion	4	1	FALSE	FALSE	FALSE	NA	FALSE	TRUE	FALSE	NA	IVB	Vandetanib	FALSE
EOC1067	ERBB2	gain	ERBB2:amp	NA	amplification	0	4-58	FALSE	FALSE	TRUE	NA	FALSE	TRUE	TRUE	NA	IIIA	Ado-Trastuzumab Emtansine, Lapatinib + Capecitabine, Lapatinib + Letrozole, Margetuximab + Chemotherapy, Neratinib, Neratinib + Capecitabine, Trastuzumab, Trastuzumab + Chemotherapy, Trastuzumab + Pertuzumab + Chemotherapy, Trastuzumab + Tucatinib + Capecitabine, Trastuzumab Deruxtecan, Tucatinib + Trastuzumab, Pembrolizumab + Trastuzumab + Chemotherapy, Trastuzumab + Pertuzumab, Lapatinib + Tras…	TRUE
EOC1067	ERBB3	gain	ERBB3:ENST00000267101:e.9::intergenic	chr12:55612625::chr12:56090753	truncated_transcripts	4	1	FALSE	FALSE	FALSE	NA	FALSE	TRUE	FALSE	NA	X	MM-121, Poziotinib, Sapitinib, Seribantumab, Vandetanib, Zenocutuzumab	FALSE
EOC1067	ERBB4	gain	CPS1:ENST00000233072:antisense::ERBB4:ENST00000342788:e.2	chr2:210501126::chr2:212526379	fusion_from_unknown	5	1	FALSE	FALSE	FALSE	NA	FALSE	TRUE	FALSE	NA	IVB	Afatinib, Dacomitinib, Neratinib, Poziotinib, Vandetanib	FALSE
EOC1067	GRIN2A	gain	GRIN2A:NM_001134407.3:exon13:c.3976G>A:p.G1326S	chr16:9763568C>T	nonsynonymous_SNV	NA	NA	FALSE	FALSE	FALSE	NA	FALSE	FALSE	FALSE	NA	X	Memantine	FALSE
EOC1067	IGF1R	gain	IGF1R:ENST00000650285:e.2::intergenic	chr15:96367901::chr15:98778232	truncated_transcripts	3	1	FALSE	FALSE	FALSE	NA	FALSE	FALSE	TRUE	NA	X	Cixutumumab, Figitumumab, Ganitumab	FALSE
EOC1067	IMPDH2	gain	IMPDH2:NM_000884.3:exon11:c.1210G>A:p.D404N	chr3:49024981C>T	nonsynonymous_SNV	NA	NA	FALSE	FALSE	FALSE	NA	FALSE	FALSE	TRUE	NA	X	Mycophenolate Mofetil	FALSE
EOC1067	KRAS	gain	KRAS:ENST00000311936:e.2::NREP:ENST00000257435:antisense	chr5:111946812::chr12:25239145	truncated_transcripts	6	0	FALSE	FALSE	FALSE	NA	FALSE	FALSE	FALSE	NA	X	Adagrasib, Binimetinib, Cetuximab, Cobimetinib, Panitumumab, Sotorasib, Trametinib	FALSE
EOC1067	NDUFAF2	gain	ZSWIM6:ENST00000252744:e.1::NDUFAF2:ENST00000296597:e.3	chr5:61092836::chr5:61465756	fusion	3	1	FALSE	FALSE	TRUE	NA	FALSE	TRUE	TRUE	NA	X	Metformin	TRUE
EOC1067	NRP1	gain	intergenic::NRP1:ENST00000374867:e.3	chr10:33134448::chr10:33283851	fusion_from_unknown	4-5	1	FALSE	FALSE	FALSE	NA	FALSE	TRUE	FALSE	NA	X	Vesencumab	FALSE
EOC1067	PDGFRB	gain	PDGFRB:ENST00000261799:e.8::SLC22A23:ENST00000406686:e.5	chr5:150130733::chr6:3300981	fusion	3	2	FALSE	FALSE	FALSE	NA	FALSE	TRUE	FALSE	NA	IIIA	Imatinib	FALSE
EOC1067	PSMB3	gain	PSMB3:amp	NA	amplification	0	4-58	FALSE	FALSE	TRUE	NA	FALSE	TRUE	TRUE	NA	X	Bortezomib, Ixazomib, Ixazomib Citrate, Marizomib, Oprozomib	TRUE
EOC1067	PSMC4	gain	PSMC4:amp	NA	amplification	1-2	4-11	FALSE	FALSE	TRUE	NA	FALSE	TRUE	TRUE	NA	X	Bortezomib, Ixazomib, Ixazomib Citrate, Oprozomib	TRUE
EOC1067	PSMD3	gain	PSMD3:ENST00000264639:e.1::RUNDC1:ENST00000361677:e.4	chr17:39982670::chr17:42990236	fusion	3-8	1	TRUE	TRUE	TRUE	NA	FALSE	TRUE	TRUE	NA	X	Bortezomib, Ixazomib, Ixazomib Citrate, Oprozomib	TRUE
EOC1067	PSMD3	gain	PSMD3:amp	NA	amplification	0	3-58	FALSE	FALSE	TRUE	NA	FALSE	TRUE	TRUE	NA	X	Bortezomib, Ixazomib, Ixazomib Citrate, Oprozomib	TRUE
EOC1067	PSMD4	gain	TRAIP:ENST00000331456:e.1::PSMD4:ENST00000368884:e.2	chr1:151254494::chr3:49856110	fusion	4	1	FALSE	FALSE	FALSE	NA	FALSE	TRUE	FALSE	NA	X	Bortezomib, Ixazomib, Ixazomib Citrate, Oprozomib	FALSE
EOC1067	TP53	loss	TP53:NM_000546.6:exon7:c.742C>T:p.R248W	chr17:7674221G>A	nonsynonymous_SNV	NA	NA	TRUE	TRUE	TRUE	NA	TRUE	TRUE	NA	TRUE	IVA	Adavosertib	TRUE
EOC1067	XPO1	gain	XPO1:ENST00000401558:e.1_2del	chr2:61528733_61607531del	5prime_deletion	5	1	FALSE	FALSE	FALSE	NA	FALSE	TRUE	FALSE	NA	X	Selinexor	FALSE
EOC1075	DDR2	gain	DDR2:NM_006182.4:exon5:c.218G>T:p.C73F	chr1:162754656G>T	nonsynonymous_SNV	NA	NA	FALSE	FALSE	FALSE	NA	TRUE	TRUE	FALSE	NA	IVB	Regorafenib	FALSE
EOC1075	FYN	gain	FYN:ENST00000354650:e.4_5dup	chr6:111713918_111762813dup	inframe_duplication	3	1	FALSE	FALSE	FALSE	NA	TRUE	TRUE	FALSE	NA	IVB	Dasatinib	FALSE
EOC1075	KIT	gain	KIT:NM_000222.3:exon6:c.1025A>T:p.K342I	chr4:54707197A>T	nonsynonymous_SNV	NA	NA	FALSE	FALSE	FALSE	NA	TRUE	FALSE	FALSE	NA	X	Avapritinib, Catequentinib, Cediranib, CM-082, Dasatinib, Dovitinib, ENMD-2076, Famitinib, Foretinib, Imatinib, Imatinib Mesylate, Nilotinib, Pazopanib, Quizartinib, Regorafenib, Ripretinib, Sorafenib, Sorafenib Tosylate, Sunitinib, Sunitinib Malate, Vatalanib, XL-820, XL-999	FALSE
EOC1075	NDUFB9	gain	NDUFB9:amp	NA	amplification	5	5	FALSE	FALSE	TRUE	NA	TRUE	TRUE	TRUE	NA	X	Metformin	TRUE
EOC1075	NDUFS3	gain	NDUFS3:ENST00000263774:e.6::KBTBD4:ENST00000430070:antisense	chr11:47583380::chr11:47592418	truncated_transcripts	4	2	FALSE	FALSE	FALSE	NA	TRUE	TRUE	FALSE	NA	X	Metformin	FALSE
EOC1075	PSMC3	gain	PSMC3:ENST00000298852:e.1del	chr11:47426245_47426280del	inframe_deletion	3	1	FALSE	FALSE	FALSE	NA	TRUE	TRUE	FALSE	NA	X	Bortezomib, Ixazomib, Ixazomib Citrate, Oprozomib	FALSE
EOC1075	PTEN	loss	PTEN:ENST00000371953:e.7dup	chr10:87954386_87958265dup	frameshift_duplication	0	2	FALSE	FALSE	TRUE	NA	TRUE	TRUE	NA	TRUE	IIIA	Capivasertib + Fulvestrant	TRUE
EOC1075	TP53	loss	TP53:NM_000546.6:exon8:c.818G>A:p.R273H	chr17:7673802C>T	nonsynonymous_SNV	NA	NA	FALSE	FALSE	TRUE	NA	TRUE	TRUE	NA	TRUE	IVA	Adavosertib	TRUE
EOC1077	ADRA1D	gain	ADRA1D:NM_000678.4:exon2:c.1385T>G:p.L462R	chr20:4221857A>C	nonsynonymous_SNV	NA	NA	FALSE	FALSE	FALSE	TRUE	FALSE	FALSE	FALSE	NA	X	Carvedilol	FALSE
EOC1077	AKT3	gain	AKT3:ENST00000673466:e.4_6dup	chr1:243635153_243670147dup	frameshift_duplication	2	1	FALSE	FALSE	FALSE	FALSE	FALSE	TRUE	FALSE	NA	X	Afuresertib, Capivasertib, Ipatasertib, MK-2206, Triciribine Phosphate, Uprosertib	FALSE
EOC1077	BRCA1	loss	BRCA1:NM_007294.4:exon10:c.1082_1092del:p.S361*	NA	germline	NA	NA	NA	NA	NA	NA	NA	TRUE	NA	TRUE	IA	Niraparib, Olaparib, Olaparib + Bevacizumab, Rucaparib	TRUE
EOC1077	CDKN2A	loss	CDKN2A:del	NA	deletion	0	NA	FALSE	TRUE	TRUE	FALSE	FALSE	TRUE	NA	TRUE	IVA	Abemaciclib, Palbociclib, Ribociclib	TRUE
EOC1077	ENG	gain	ENG:ENST00000373203:e.3_13del	chr9:127816124_127833470del	frameshift_deletion	1	1	FALSE	FALSE	FALSE	TRUE	FALSE	TRUE	FALSE	NA	X	Carotuximab	FALSE
EOC1077	GRIN3A	gain	GRIN3A:NM_133445.3:exon1:c.456G>A:p.M152I	chr9:101737524C>T	nonsynonymous_SNV	NA	NA	FALSE	FALSE	FALSE	FALSE	FALSE	TRUE	FALSE	NA	X	Memantine	FALSE
EOC1077	HTR3C	gain	HTR3C:ENST00000318351:e.1_5dup	chr3:184044727_184057174dup	truncated_duplication	4	1	FALSE	FALSE	FALSE	TRUE	FALSE	TRUE	FALSE	NA	X	Ramosetron	FALSE
EOC1077	IL1A	gain	IL1A:ENST00000263339:e.5::intergenic	chr2:112778329::chr9:94235281	truncated_transcripts	2	1	FALSE	FALSE	FALSE	TRUE	FALSE	TRUE	FALSE	NA	X	Bermekimab	FALSE
EOC1077	LAG3	gain	LAG3:NM_002286.6:exon5:c.919C>A:p.L307I	chr12:6775410C>A	nonsynonymous_SNV	NA	NA	FALSE	FALSE	FALSE	TRUE	FALSE	FALSE	FALSE	NA	X	Fianlimab, Relatlimab	FALSE
EOC1077	NDUFS2	gain	NDUFS2:ENST00000676972:e.1_2dup	chr1:161172572_161204413dup	truncated_duplication	1	1	FALSE	FALSE	FALSE	FALSE	FALSE	FALSE	FALSE	NA	X	Metformin	FALSE
EOC1077	NF1	loss	NF1:ENST00000358273:e.39_43dup	chr17:31329561_31337445dup	frameshift_duplication	1	0	FALSE	FALSE	FALSE	FALSE	FALSE	TRUE	NA	FALSE	IIIA	Selumetinib	FALSE
EOC1077	PTCH1	loss	TRAF1:ENST00000373887:e.7::PTCH1:ENST00000331920:e.3	chr9:95485778::chr9:120907466	fusion	2	1	FALSE	FALSE	FALSE	TRUE	FALSE	TRUE	NA	FALSE	X	Sonidegib, Vismodegib	FALSE
EOC1077	PTK2	gain	TRAPPC9:ENST00000438773:e.8::PTK2:ENST00000696786:e.15	chr8:140360219::chr8:140784170	fusion	2	0	FALSE	FALSE	TRUE	FALSE	FALSE	TRUE	TRUE	NA	X	Defactinib, GSK-2256098	TRUE
EOC1077	RAD51B	loss	RAD51B:ENST00000488612:e.11dup	chr14:68597380_68712141dup	inframe_duplication	0	1	FALSE	TRUE	FALSE	FALSE	FALSE	TRUE	NA	TRUE	IIIA	Olaparib	TRUE
EOC1077	RARG	gain	RARG:ENST00000425354:e.3::ITGB7:ENST00000267082:e.2	chr12:53216898::chr12:53256269	fusion	2	0	FALSE	FALSE	FALSE	FALSE	FALSE	TRUE	FALSE	NA	IVB	Tretinoin	FALSE
EOC1077	TP53	loss	TP53:NM_000546.6:exon8:c.919+1G>A	chr17:7673700C>T	splicing	NA	NA	FALSE	TRUE	TRUE	TRUE	TRUE	TRUE	NA	TRUE	IVA	Adavosertib	TRUE
EOC1077	WEE1	gain	WEE1:NM_003390.4:exon1:c.133A>G:p.S45G	chr11:9574066A>G	nonsynonymous_SNV	NA	NA	FALSE	FALSE	FALSE	FALSE	FALSE	FALSE	TRUE	NA	X	Adavosertib	FALSE
EOC1080	PDE4D	gain	PDE4D:ENST00000340635:e.1del	chr5:59759285_60187135del	5prime_deletion	3	0	FALSE	FALSE	FALSE	NA	FALSE	TRUE	FALSE	NA	X	Roflumilast	FALSE
EOC1080	PSMD3	gain	PSMD3:ENST00000264639:e.6::KIF19:ENST00000389916:antisense	chr17:39994070::chr17:74326806	truncated_transcripts	3	1	FALSE	FALSE	FALSE	NA	TRUE	TRUE	FALSE	NA	X	Bortezomib, Ixazomib, Ixazomib Citrate, Oprozomib	FALSE
EOC1080	TP53	loss	TP53:NM_000546.6:exon8:c.783-1G>T	chr17:7673838C>A	splicing	NA	NA	FALSE	TRUE	FALSE	NA	TRUE	TRUE	NA	TRUE	IVA	Adavosertib	TRUE
EOC1083	EPHA2	gain	EPHA2:ENST00000358432:e.3del	chr1:16147874_16149564del	frameshift_deletion	0-1	0-1	FALSE	FALSE	FALSE	NA	TRUE	TRUE	FALSE	NA	X	Dasatinib, Regorafenib, Vandetanib	FALSE
EOC1083	FLT3	gain	FLT3:NM_004119.3:exon10:c.1277A>T:p.Q426L	chr13:28037217T>A	nonsynonymous_SNV	NA	NA	FALSE	FALSE	FALSE	NA	TRUE	FALSE	FALSE	NA	X	CM-082, Crenolanib, Dovitinib, ENMD-2076, ENMD-981693, Famitinib, Fedratinib, Foretinib, Gilteritinib, Quizartinib, Sorafenib, Sorafenib Tosylate, Sunitinib, Sunitinib Malate, XL-999	FALSE
EOC1083	MTOR	gain	MTOR:NM_004958.4:exon53:c.7210A>T:p.M2404L	chr1:11114408T>A	nonsynonymous_SNV	NA	NA	FALSE	FALSE	FALSE	NA	TRUE	FALSE	TRUE	NA	X	Apitolisib, AZD-8055, BGT-226, Dactolisib, Everolimus, Gedatolisib, Omipalisib, PF-04691502, Ridaforolimus, Sapanisertib, SF-1126, Temsirolimus, Vistusertib, Voxtalisib	FALSE
EOC1083	NF1	loss	NF1:NM_001042492.3:exon5:c.487G>T:p.E163X	chr17:31169898G>T	stopgain	NA	NA	TRUE	TRUE	TRUE	NA	TRUE	TRUE	NA	TRUE	IIIA	Selumetinib	TRUE
EOC1083	TP53	loss	TP53:NM_000546.6:exon7:c.745delA:p.R249Gfs*96	chr17:7674217CT>C	frameshift_deletion	NA	NA	TRUE	TRUE	TRUE	NA	TRUE	TRUE	NA	TRUE	IVA	Adavosertib	TRUE
EOC1085	BCL2L2-PABPN1	gain	intergenic::BCL2L2-PABPN1:ENST00000553781:e.4	chr14:23315771::chr14:23327027	fusion_from_unknown	2	1	FALSE	FALSE	FALSE	NA	FALSE	TRUE	FALSE	NA	X	Navitoclax	FALSE
EOC1085	NDUFC2	gain	NDUFC2:amp	NA	amplification	1	3-7	TRUE	FALSE	FALSE	NA	FALSE	TRUE	TRUE	NA	X	Metformin	TRUE
EOC1085	NF1	loss	NF1:ENST00000358273:e.49_51dup	chr17:31345069_31354661dup	inframe_duplication	0	1	FALSE	TRUE	FALSE	NA	FALSE	TRUE	NA	TRUE	IIIA	Selumetinib	TRUE
EOC1085	TP53	loss	TP53:NM_000546.6:exon4:c.97dupT:p.S33Ffs*10	chr17:7676271G>GA	frameshift_insertion	NA	NA	TRUE	TRUE	TRUE	NA	TRUE	TRUE	NA	TRUE	IVA	Adavosertib	TRUE
EOC1085	TSC1	loss	TSC1:NM_000368.5:exon18:c.2355_2377del:p.D785Efs*33	chr9:132902618CTCTGGTTGTAGAATTCCTCTCGG>C	frameshift_deletion	NA	NA	FALSE	TRUE	FALSE	NA	FALSE	TRUE	NA	TRUE	IIIA	Everolimus	TRUE
EOC1091	AKT3	gain	AKT3:ENST00000673466:e.3_7del	chr1:243614870_243762841del	frameshift_deletion	3	1	FALSE	FALSE	FALSE	NA	FALSE	TRUE	FALSE	NA	X	Afuresertib, Capivasertib, Ipatasertib, MK-2206, Triciribine Phosphate, Uprosertib	FALSE
EOC1091	ESR1	gain	RMND1:ENST00000444024:antisense::ESR1:ENST00000206249:e.3	chr6:151408670::chr6:151869227	fusion_from_unknown	1	0	FALSE	FALSE	FALSE	NA	FALSE	TRUE	FALSE	NA	IIIB	Elacestrant	FALSE
EOC1091	FANCL	loss	FANCL:NM_018062.4:exon1:c.20G>T:p.S7I	chr2:58241294C>A	nonsynonymous_SNV	NA	NA	FALSE	FALSE	FALSE	NA	TRUE	FALSE	NA	FALSE	X	Olaparib	FALSE
EOC1091	HDAC7	gain	HDAC7:amp	NA	amplification	2-3	4-10	FALSE	FALSE	FALSE	NA	FALSE	FALSE	NA	NA	X	Belinostat, CUDC-101, Entinostat, Panobinostat	FALSE
EOC1091	IGF1R	gain	IGF1R:ENST00000650285:e.3_20del	chr15:98715505_98953936del	frameshift_deletion	2-3	1	FALSE	FALSE	FALSE	NA	FALSE	TRUE	FALSE	NA	X	Cixutumumab, Figitumumab, Ganitumab	FALSE
EOC1091	IRAK4	gain	IRAK4:amp	NA	amplification	2-3	4-10	FALSE	TRUE	FALSE	NA	FALSE	TRUE	TRUE	NA	IVB	Emavusertib	TRUE
EOC1091	KLRC1	gain	KLRC1:amp	NA	amplification	4-6	4-10	FALSE	FALSE	FALSE	NA	FALSE	FALSE	NA	NA	X	Monalizumab	FALSE
EOC1091	KRAS	gain	KRAS:amp	NA	amplification	3-5	4-10	TRUE	TRUE	FALSE	NA	FALSE	TRUE	TRUE	NA	IVB	Adagrasib, Sotorasib	TRUE
EOC1091	LAG3	gain	LAG3:amp	NA	amplification	3-5	4-10	FALSE	FALSE	FALSE	NA	FALSE	FALSE	NA	NA	X	Fianlimab, Relatlimab	FALSE
EOC1091	MET	gain	MET:NM_000245.4:exon20:c.3822G>A:p.W1274X	chr7:116795678G>A	stopgain	NA	NA	FALSE	FALSE	FALSE	NA	TRUE	FALSE	TRUE	NA	X	Altiratinib, AMG-208, AMG-337, Amivantamab, Cabozantinib, Cabozantinib S-Malate, Capmatinib, Crizotinib, Elzovantinib, Emibetuzumab, Foretinib, Glesatinib, Golvatinib, Merestinib, MK-2461, MK-8033, Onartuzumab, Savolitinib, Tepotinib, Tivantinib	FALSE
EOC1091	NDUFA9	gain	NDUFA9:amp	NA	amplification	3-5	4-10	FALSE	TRUE	FALSE	NA	FALSE	TRUE	TRUE	NA	X	Metformin	TRUE
EOC1091	PIM1	gain	PIM1:amp	NA	amplification	3-5	43-73	FALSE	FALSE	FALSE	NA	TRUE	FALSE	NA	NA	X	AZD-1208	FALSE
EOC1091	PNP	gain	STRN3:ENST00000357479:antisense::PNP:ENST00000361505:e.6;PNP:ENST00000361505:e.5::intergenic	chr14:20476013::chr14:30998764;chr14:20475960::chr14:20611795	balanced_translocation	9	1	FALSE	FALSE	FALSE	NA	FALSE	TRUE	FALSE	NA	X	Forodesine, Forodesine Hydrochloride	FALSE
EOC1091	PSMA6	gain	PSMA6:amp	NA	amplification	1	9-19	FALSE	FALSE	FALSE	NA	TRUE	FALSE	NA	NA	X	Bortezomib, Ixazomib, Ixazomib Citrate, Marizomib, Oprozomib	FALSE
EOC1091	SRD5A3	gain	SRD5A3:NM_024592.5:exon3:c.448G>C:p.V150L	chr4:55364157G>C	nonsynonymous_SNV	NA	NA	FALSE	FALSE	FALSE	NA	FALSE	FALSE	FALSE	NA	X	Abiraterone	FALSE
EOC1091	TP53	loss	TP53:NM_000546.6:exon5:c.488A>G:p.Y163C	chr17:7675124T>C	nonsynonymous_SNV	NA	NA	TRUE	TRUE	TRUE	NA	TRUE	TRUE	NA	TRUE	IVA	Adavosertib	TRUE
EOC1091	VEGFA	gain	VEGFA:amp	NA	amplification	3-5	28-38	FALSE	FALSE	FALSE	NA	TRUE	FALSE	NA	NA	X	Bevacizumab	FALSE
EOC1099	CDK12	loss	CDK12:NM_016507.4:exon13:c.3618G>C:p.M1206I	chr17:39526174G>C	nonsynonymous_SNV	NA	NA	FALSE	FALSE	FALSE	NA	FALSE	FALSE	NA	TRUE	X	Cemiplimab, Olaparib, Talazoparib	FALSE
EOC1099	EPHA10	gain	EPHA10:amp	NA	amplification	1-2	10-16	FALSE	FALSE	FALSE	NA	TRUE	FALSE	NA	NA	X	Vandetanib	FALSE
EOC1099	EPHA5	gain	intergenic::EPHA5:ENST00000613740:e.4	chr4:58344243::chr4:65532285	fusion_from_unknown	4	6-7	FALSE	FALSE	FALSE	NA	FALSE	TRUE	FALSE	NA	IVB	Vandetanib	FALSE
EOC1099	EPHA5	gain	EPHA5:amp	NA	amplification	1	2-9	FALSE	FALSE	FALSE	NA	FALSE	FALSE	NA	NA	X	Vandetanib	FALSE
EOC1099	EPHB1	gain	EPHB1:ENST00000398015:antisense::EPHB1:ENST00000398015:e.4	chr3:135019667::chr3:135020065	fusion_from_unknown	2-3	0-1	FALSE	FALSE	FALSE	NA	FALSE	TRUE	FALSE	NA	IVB	Vandetanib	FALSE
EOC1099	ESR1	gain	ESR1:ENST00000206249:e.1_6dup	chr6:151755734_152063826dup	truncated_duplication	1	1	FALSE	FALSE	FALSE	NA	FALSE	TRUE	FALSE	NA	X	Elacestrant, Fulvestrant	FALSE
EOC1099	FNTA	gain	FNTA:amp	NA	amplification	1-2	8-12	FALSE	FALSE	FALSE	NA	TRUE	TRUE	NA	NA	IVB	Tipifarnib	NA
EOC1099	GRIN2D	gain	ODAD1:ENST00000674294:antisense::GRIN2D:ENST00000263269:e.12	chr19:48331745::chr19:48433102	fusion_from_unknown	1	1	FALSE	FALSE	FALSE	NA	FALSE	TRUE	FALSE	NA	X	Memantine	FALSE
EOC1099	KIR2DL1	gain	KIR2DL1:NM_014218.3:exon3:c.212G>A:p.R71H	chr19:54773474G>A	nonsynonymous_SNV	NA	NA	FALSE	FALSE	FALSE	NA	FALSE	FALSE	NA	NA	X	Lirilumab	FALSE
EOC1099	MKNK1	gain	MKNK1:amp	NA	amplification	1-2	6-7	FALSE	FALSE	FALSE	NA	FALSE	FALSE	NA	NA	X	Tomivosertib	FALSE
EOC1099	NDUFA13	gain	NDUFA13:amp	NA	amplification	1-2	7-11	FALSE	FALSE	FALSE	NA	FALSE	FALSE	NA	NA	X	Metformin	FALSE
EOC1099	NDUFB7	gain	NDUFB7:amp	NA	amplification	1-2	13-18	FALSE	FALSE	FALSE	NA	TRUE	TRUE	NA	NA	X	Metformin	NA
EOC1099	NDUFS5	gain	NDUFS5:amp	NA	amplification	1-2	10-14	FALSE	FALSE	FALSE	NA	TRUE	FALSE	NA	NA	X	Metformin	FALSE
EOC1099	PDE4C	gain	PDE4C:amp	NA	amplification	1-2	7-11	FALSE	FALSE	FALSE	NA	FALSE	FALSE	NA	NA	X	Roflumilast	FALSE
EOC1099	PIK3R2	gain	PIK3R2:amp	NA	amplification	1-2	7-11	FALSE	FALSE	FALSE	NA	FALSE	TRUE	NA	NA	X	Apitolisib, BGT-226, Dactolisib, Gedatolisib, Omipalisib, PF-04691502, Pictilisib, Pilaralisib, SF-1126, Sonolisib, Voxtalisib	NA
EOC1099	PIK3R3	gain	PIK3R3:amp	NA	amplification	1-2	6-7	FALSE	FALSE	FALSE	NA	FALSE	FALSE	NA	NA	X	Apitolisib, BGT-226, Dactolisib, Gedatolisib, Omipalisib, PF-04691502, Pictilisib, Pilaralisib, SF-1126, Sonolisib, Voxtalisib	FALSE
EOC1099	PSMB4	gain	PSMB4:amp	NA	amplification	2	2-9	FALSE	FALSE	FALSE	NA	FALSE	TRUE	NA	NA	X	Bortezomib, Ixazomib, Ixazomib Citrate, Marizomib, Oprozomib	NA
EOC1099	PSMC4	gain	PSMC4:amp	NA	amplification	1	1-10	FALSE	FALSE	FALSE	NA	FALSE	TRUE	NA	NA	X	Bortezomib, Ixazomib, Ixazomib Citrate, Oprozomib	NA
EOC1099	PSMD4	gain	PSMD4:amp	NA	amplification	2	2-9	FALSE	FALSE	FALSE	NA	FALSE	TRUE	NA	NA	X	Bortezomib, Ixazomib, Ixazomib Citrate, Oprozomib	NA
EOC1099	TP53	loss	TP53:NM_000546.6:exon5:c.535C>T:p.H179Y	chr17:7675077G>A	nonsynonymous_SNV	NA	NA	TRUE	FALSE	TRUE	NA	TRUE	TRUE	NA	TRUE	IVA	Adavosertib	TRUE
EOC1099	TSC2	loss	TSC2:ENST00000219476:e.38::intergenic	chr16:2087138::chrX:86882475	truncated_transcripts	2	0	FALSE	FALSE	FALSE	NA	FALSE	TRUE	NA	FALSE	IIIA	Everolimus	FALSE
EOC1106	FLT1	gain	FLT1:ENST00000282397:e.14::MTUS2:ENST00000612955:antisense	chr13:28362747::chr13:28884426	truncated_transcripts	2	1	FALSE	FALSE	FALSE	NA	TRUE	TRUE	FALSE	NA	X	AEE-788, Axitinib, BMS-690514, Brivanib, Brivanib Alaninate, Cediranib, CEP-11981, Dovitinib, Famitinib, Foretinib, Fruquintinib, Glesatinib, Ilorasertib, Lenvatinib, Lenvatinib Mesylate, Lucitanib, Pazopanib, Regorafenib, Sorafenib, Sorafenib Tosylate, Sunitinib, Sunitinib Malate, Vandetanib, Vatalanib, XL-820, XL-999	FALSE
EOC1106	PDE4D	gain	PDE4D:ENST00000340635:e.1::intergenic	chr5:59577320::chr20:17921970	truncated_transcripts	2	1	FALSE	FALSE	FALSE	NA	TRUE	TRUE	FALSE	NA	X	Roflumilast	FALSE
EOC1106	TP53	loss	TP53:NM_000546.6:exon8:c.916C>T:p.R306X|TP53:NM_000546.6:exon4:c.158G>A:p.W53X	chr17:7673704:G>A|chr17:7676211:C>T	stopgain	NA	NA	FALSE	FALSE	TRUE	FALSE	TRUE	TRUE	NA	TRUE	IVA	Adavosertib	TRUE
EOC1107	BIRC2	gain	ARHGAP42:ENST00000298815:antisense::BIRC2:ENST00000227758:e.4;BIRC2:ENST00000227758:e.3::ARHGAP42:ENST00000298815:antisense;BIRC2:ENST00000227758:e.3::SCARB2:ENST00000264896:antisense;JADE1:ENST00000226319:e.0::BIRC2:ENST00000227758:e.4	chr11:100939696::chr11:102358307;chr11:100938528::chr11:102358495;chr4:76172455::chr11:102354529;chr4:128808943::chr11:102354982	multiple	2	NA	FALSE	FALSE	FALSE	NA	FALSE	TRUE	FALSE	NA	X	Birinapant	FALSE
EOC1107	CHEK2	loss	HORMAD2:ENST00000336726:antisense::CHEK2:ENST00000404276:e.6	chr22:28715755::chr22:30161280	fusion_from_unknown	1	0	FALSE	FALSE	FALSE	NA	FALSE	TRUE	NA	FALSE	IIIA	Olaparib, Talazoparib + Enzalutamide	FALSE
EOC1107	EML4	gain	EML4:NM_019063.5:exon21:c.2341G>C:p.G781R	chr2:42326252G>C	splicing	NA	NA	FALSE	FALSE	FALSE	NA	FALSE	FALSE	FALSE	NA	X	Alectinib, Ceritinib, Crizotinib, Lorlatinib	FALSE
EOC1107	EPHA10	gain	EPHA10:amp	NA	amplification	1-2	6-10	FALSE	FALSE	FALSE	NA	TRUE	FALSE	NA	NA	X	Vandetanib	FALSE
EOC1107	GRIN2A	gain	GRIN2A:ENST00000330684:e.2::intergenic	chr16:7810158::chr16:10056823	truncated_transcripts	2	0-1	FALSE	FALSE	FALSE	NA	FALSE	FALSE	TRUE	NA	X	Memantine	FALSE
EOC1107	MKNK1	gain	MKNK1:amp	NA	amplification	1-2	5-8	FALSE	FALSE	FALSE	NA	FALSE	FALSE	NA	NA	X	Tomivosertib	FALSE
EOC1107	NDUFB7	gain	NDUFB7:amp	NA	amplification	1	7-8	TRUE	FALSE	TRUE	NA	TRUE	TRUE	TRUE	NA	X	Metformin	TRUE
EOC1107	NDUFS1	gain	NDUFS1:NM_005006.7:exon9:c.827G>A:p.R276H	chr2:206144937C>T	nonsynonymous_SNV	NA	NA	TRUE	FALSE	TRUE	NA	TRUE	TRUE	TRUE	NA	X	Metformin	TRUE
EOC1107	NDUFS5	gain	NDUFS5:amp	NA	amplification	1-2	6-10	FALSE	FALSE	FALSE	NA	TRUE	FALSE	NA	NA	X	Metformin	FALSE
EOC1107	NTRK1	gain	LEXM:ENST00000371273:e.4::NTRK1:ENST00000524377:e.7	chr1:54808292::chr1:156870711	fusion	1-4	1	FALSE	FALSE	FALSE	NA	TRUE	TRUE	FALSE	NA	IC	Entrectinib, Larotrectinib, Repotrectinib	FALSE
EOC1107	PIK3R3	gain	PIK3R3:amp	NA	amplification	1-2	5-8	FALSE	FALSE	FALSE	NA	FALSE	FALSE	NA	NA	X	Apitolisib, BGT-226, Dactolisib, Gedatolisib, Omipalisib, PF-04691502, Pictilisib, Pilaralisib, SF-1126, Sonolisib, Voxtalisib	FALSE
EOC1107	PSMB2	gain	PSMB2:amp	NA	amplification	1-2	5-8	FALSE	FALSE	FALSE	NA	FALSE	FALSE	NA	NA	X	Bortezomib, Ixazomib, Ixazomib Citrate, Marizomib, Oprozomib	FALSE
EOC1107	RAD51B	loss	RAD51B:ENST00000471583:e.7::FUT8:ENST00000673929:antisense	chr14:65637507::chr14:68272138	multiple	4	0-1	FALSE	FALSE	FALSE	NA	FALSE	TRUE	NA	FALSE	IIIA	Olaparib	FALSE
EOC1107	TP53	loss	TP53:NM_000546.6:exon6:c.586C>T:p.R196X	chr17:7674945G>A	stopgain	NA	NA	TRUE	FALSE	TRUE	NA	TRUE	TRUE	NA	TRUE	IVA	Adavosertib	TRUE
EOC111	ABL1	gain	UBR3:ENST00000272793:e.1::ABL1:ENST00000318560:e.8	chr2:169854554::chr9:130877210	fusion	3	1	FALSE	FALSE	FALSE	NA	FALSE	TRUE	FALSE	NA	IIIB	Dasatinib, Imatinib, Ponatinib, Asciminib, Bosutinib, Nilotinib	FALSE
EOC111	ADRA1A	gain	ADRA1A:NM_000680.4:exon3:c.890T>A:p.F297Y	chr8:26770660A>T	nonsynonymous_SNV	NA	NA	FALSE	FALSE	FALSE	NA	TRUE	FALSE	FALSE	NA	X	Carvedilol	FALSE
EOC111	BRCA1	loss	BRCA1:ENST00000357654:antisense::BRCA1:ENST00000357654:e.4;CCDC200:ENST00000636331:antisense::BRCA1:ENST00000357654:e.4;BRCA1:ENST00000357654:antisense::BRCA1:ENST00000357654:e.2	chr17:43114503::chr17:43232789	fusion_from_unknown	0	2	FALSE	FALSE	TRUE	NA	TRUE	TRUE	NA	TRUE	IA	Niraparib, Olaparib, Olaparib + Bevacizumab, Rucaparib	TRUE
EOC111	CCDC6	gain	intergenic::CCDC6:ENST00000263102:e.6	chr10:59780105::chr10:59809761	fusion_from_unknown	2	1	FALSE	FALSE	FALSE	NA	TRUE	TRUE	FALSE	NA	IVB	Pralsetinib, Selpercatinib	FALSE
EOC111	ENG	gain	ENG:ENST00000373203:e.8del	chr9:127824265_127824328del	frameshift_deletion	2	1	FALSE	FALSE	FALSE	NA	FALSE	TRUE	FALSE	NA	X	Carotuximab	FALSE
EOC111	EPHA2	gain	EPHA2:NM_004431.5:exon11:c.1970G>C:p.R657P	chr1:16133263C>G	nonsynonymous_SNV	NA	NA	FALSE	FALSE	TRUE	NA	TRUE	TRUE	TRUE	NA	IVB	Dasatinib, Regorafenib, Vandetanib	TRUE
EOC111	EPHA6	gain	CNTNAP2:ENST00000361727:antisense::EPHA6:ENST00000389672:e.15	chr3:97668952::chr7:147896776	fusion_from_unknown	4	0	FALSE	FALSE	FALSE	NA	FALSE	TRUE	FALSE	NA	IVB	Vandetanib	FALSE
EOC111	EPHB3	gain	EPHB3:amp	NA	amplification	1	7	FALSE	FALSE	FALSE	NA	TRUE	FALSE	NA	NA	X	Vandetanib	FALSE
EOC111	ERBB4	gain	ERBB4:ENST00000342788:e.1::intergenic	chr2:212433432::chr11:125936771	truncated_transcripts	3	1	FALSE	FALSE	FALSE	NA	TRUE	TRUE	FALSE	NA	X	AC-480, Afatinib, BMS-690514, Dacomitinib, Dacomitinib Anhydrous, JNJ-26483327, Neratinib, Poziotinib, Vandetanib	FALSE
EOC111	GSK3B	gain	GSK3B:ENST00000264235:e.3dup	chr3:119940715_119953772dup	inframe_duplication	3	1	FALSE	FALSE	TRUE	NA	TRUE	TRUE	TRUE	NA	X	LY-2090314	TRUE
EOC111	HTR3C	gain	HTR3C:amp	NA	amplification	1	7	FALSE	FALSE	FALSE	NA	TRUE	FALSE	NA	NA	X	Ramosetron	FALSE
EOC111	HTR3D	gain	HTR3D:amp	NA	amplification	1	7	FALSE	FALSE	FALSE	NA	TRUE	FALSE	NA	NA	X	Ramosetron	FALSE
EOC111	HTR3E	gain	HTR3E:amp	NA	amplification	1	7	FALSE	FALSE	FALSE	NA	TRUE	FALSE	NA	NA	X	Ramosetron	FALSE
EOC111	KIR2DL1	gain	KIR2DL1:NM_014218.3:exon3:c.124G>T:p.E42X	chr19:54773386G>T	stopgain	NA	NA	FALSE	FALSE	FALSE	NA	TRUE	FALSE	FALSE	NA	X	Lirilumab	FALSE
EOC111	NDUFA5	gain	NDUFA5:ENST00000355749:e.3::MITF:ENST00000352241:e.2	chr3:69843068::chr7:123548378	fusion	3	1	FALSE	FALSE	TRUE	NA	TRUE	TRUE	TRUE	NA	X	Metformin	TRUE
EOC111	NDUFB10	gain	NDUFB10:ENST00000268668:e.1_4dup	chr16:1956324_1961858dup	truncated_duplication	1-2	1	FALSE	FALSE	FALSE	NA	TRUE	TRUE	FALSE	NA	X	Metformin	FALSE
EOC111	NDUFB10	gain	NDUFB10:NM_004548.3:exon4:c.472_473insATGCCTCACTAATTTTTGTATTGTTTATAGAGATGGGGATCTCATTA:p.L158Hfs*50	chr16:1961859C>CATGCCTCACTAATTTTTGTATTGTTTATAGAGATGGGGATCTCATTA	frameshift_insertion	NA	NA	FALSE	FALSE	FALSE	NA	TRUE	FALSE	FALSE	NA	X	Metformin	FALSE
EOC111	NDUFB5	gain	NDUFB5:amp	NA	amplification	1	6-7	FALSE	FALSE	FALSE	NA	FALSE	FALSE	NA	NA	X	Metformin	FALSE
EOC111	PARP1	gain	PARP1:NM_001618.4:exon22:c.2858A>G:p.K953R	chr1:226362074T>C	nonsynonymous_SNV	NA	NA	FALSE	FALSE	FALSE	NA	FALSE	FALSE	TRUE	NA	X	Niraparib, Olaparib, Pamiparib, Rucaparib, Senaparib, Talazoparib, Veliparib	FALSE
EOC111	PIK3CA	gain	PIK3CA:amp	NA	amplification	1	6-7	FALSE	FALSE	FALSE	NA	FALSE	FALSE	NA	NA	X	Alpelisib, Apitolisib, BGT-226, Capivasertib, Dactolisib, Fulvestrant, Gedatolisib, Inavolisib, Omipalisib, Palbociclib, PF-04691502, Pictilisib, Pilaralisib, Serabelisib, SF-1126, Sonolisib, Voxtalisib	FALSE
EOC111	PSMD2	gain	PSMD2:amp	NA	amplification	1	7	FALSE	FALSE	TRUE	NA	TRUE	TRUE	TRUE	NA	X	Bortezomib, Ixazomib, Ixazomib Citrate, Oprozomib	TRUE
EOC111	TP53	loss	TP53:NM_000546.6:exon7:c.723delC:p.C242Afs*5	chr17:7674239AG>A	frameshift_deletion	NA	NA	FALSE	FALSE	TRUE	NA	TRUE	TRUE	NA	TRUE	IVA	Adavosertib	TRUE
EOC1110	BCL2L1	gain	BCL2L1:amp	NA	amplification	2	2-10	FALSE	FALSE	FALSE	NA	FALSE	FALSE	NA	NA	X	Navitoclax	FALSE
EOC1110	HCK	gain	HCK:amp	NA	amplification	2	2-10	FALSE	FALSE	FALSE	NA	FALSE	FALSE	NA	NA	X	Bosutinib, Dasatinib, ENMD-981693, Ilorasertib	FALSE
EOC1110	TP53	loss	TP53:NM_000546.6:exon9:c.983_984del:p.F328Yfs*8	chr17:7673543TGA>T	frameshift_deletion	NA	NA	TRUE	TRUE	TRUE	NA	TRUE	TRUE	NA	TRUE	IVA	Adavosertib	TRUE
EOC1116	EGFR	gain	EGFR:ENST00000275493:e.20::intergenic	chr7:50274270::chr7:55188383	truncated_transcripts	2	1	FALSE	FALSE	FALSE	NA	FALSE	TRUE	FALSE	NA	X	AC-480, AEE-788, Afatinib, Amivantamab, Aumolertinib, BMS-690514, Brigatinib, Cetuximab, CLN-081, CUDC-101, Dacomitinib, Dacomitinib Anhydrous, Erlotinib, Erlotinib Hydrochloride, Gefitinib, JNJ-26483327, Lapatinib, Lazertinib, MP-412, Neratinib, Nimotuzumab, Osimertinib, Panitumumab, Poziotinib, Sapitinib, TAK-285, Tesevatinib, Theliatinib, Vandetanib, Varlitinib	FALSE
EOC1116	ERBB4	gain	ERBB4:NM_005235.3:exon21:c.2518G>A:p.V840I	chr2:211431070C>T	nonsynonymous_SNV	NA	NA	FALSE	FALSE	FALSE	NA	FALSE	TRUE	FALSE	NA	IVB	Afatinib, Dacomitinib, Neratinib, Poziotinib, Vandetanib	FALSE
EOC1116	MDM2	gain	PTPRB:ENST00000334414:antisense::MDM2:ENST00000258149:e.2	chr12:68799444::chr12:70544614	fusion_from_unknown	4	1	FALSE	FALSE	FALSE	NA	FALSE	TRUE	FALSE	NA	IVB	Brigimadlin, Milademetan	FALSE
EOC1116	PDE4D	gain	PDE4D:ENST00000340635:antisense::NDUFAF2:ENST00000296597:e.2	chr5:58969898::chr5:60988303	fusion_from_unknown	1	1	FALSE	FALSE	FALSE	NA	FALSE	TRUE	FALSE	NA	X	Roflumilast	FALSE
EOC1116	TP53	loss	TP53:NM_000546.6:exon8:c.818G>C:p.R273P	chr17:7673802C>G	nonsynonymous_SNV	NA	NA	TRUE	FALSE	FALSE	NA	TRUE	TRUE	NA	TRUE	IVA	Adavosertib	TRUE
EOC1116	WEE1	gain	WEE1:NM_003390.4:exon10:c.1642-2A>C	chr11:9586709A>C	splicing	NA	NA	FALSE	FALSE	FALSE	NA	TRUE	FALSE	TRUE	NA	X	Adavosertib	FALSE
EOC1117	ARID1A	loss	ARID1A:ENST00000324856:e.11::intergenic	chr1:26481502::chr1:26767975	truncated_transcripts	3	1	FALSE	FALSE	FALSE	NA	TRUE	TRUE	NA	FALSE	IVA	PLX2853, Tazemetostat	FALSE
EOC1117	CDK12	loss	CDK12:NM_016507.4:exon9:c.2846+1G>A	chr17:39515809G>A	splicing	NA	NA	TRUE	TRUE	FALSE	NA	TRUE	TRUE	NA	TRUE	IIIA	Olaparib, Talazoparib + Enzalutamide	TRUE
EOC1117	ERBB4	gain	MAP2:ENST00000682079:antisense::ERBB4:ENST00000342788:e.2	chr2:209503976::chr2:212227067	fusion_from_unknown	2	1	FALSE	FALSE	FALSE	NA	TRUE	TRUE	FALSE	NA	IVB	Afatinib, Dacomitinib, Neratinib, Poziotinib, Vandetanib	FALSE
EOC1117	FGFR2	gain	VAX1:ENST00000369206:e.0::FGFR2:ENST00000358487:e.3	chr10:117142756::chr10:121577086	promoter_hijacking	2	3	FALSE	FALSE	FALSE	NA	TRUE	TRUE	FALSE	NA	X	AZD-4547, Brivanib, Brivanib Alaninate, ENMD-981693, Erdafitinib, Fexagratinib, Futibatinib, Infigratinib, Lirafugratinib, Lucitanib, Pemigatinib, Regorafenib, Rogaratinib, XL-999	FALSE
EOC1117	GPD2	gain	GPD2:NM_000408.5:exon3:c.103-1G>T	chr2:156496043G>T	splicing	NA	NA	FALSE	FALSE	FALSE	NA	TRUE	FALSE	FALSE	NA	X	Metformin	FALSE
EOC1117	HDAC4	gain	HDAC4:ENST00000543185:e.3_22dup	chr2:239078180_239251447dup	frameshift_duplication	1	1	FALSE	FALSE	FALSE	NA	TRUE	TRUE	FALSE	NA	X	Belinostat, CUDC-101, Entinostat, Panobinostat	FALSE
EOC1117	PIK3R2	gain	PIK3R2:NM_005027.4:exon11:c.1330G>T:p.A444S	chr19:18163302G>T	nonsynonymous_SNV	NA	NA	FALSE	FALSE	FALSE	NA	TRUE	FALSE	TRUE	NA	X	Apitolisib, BGT-226, Dactolisib, Gedatolisib, Omipalisib, PF-04691502, Pictilisib, Pilaralisib, SF-1126, Sonolisib, Voxtalisib	FALSE
EOC1117	PSMB4	gain	PSMB4:amp	NA	amplification	2-3	6	TRUE	FALSE	FALSE	NA	TRUE	TRUE	TRUE	NA	X	Bortezomib, Ixazomib, Ixazomib Citrate, Marizomib, Oprozomib	TRUE
EOC1117	PSMD4	gain	PSMD4:amp	NA	amplification	2-3	6	TRUE	FALSE	FALSE	NA	TRUE	TRUE	TRUE	NA	X	Bortezomib, Ixazomib, Ixazomib Citrate, Oprozomib	TRUE
EOC1117	RARB	gain	ARHGEF26:ENST00000465093:antisense::RARB:ENST00000330688:e.4	chr3:25531015::chr3:154184151	fusion_from_unknown	2	1	FALSE	FALSE	FALSE	NA	TRUE	TRUE	FALSE	NA	IVB	Tretinoin	FALSE
EOC1117	RPS6KB1	gain	RPS6KB1:ENST00000225577:e.1_7dup	chr17:59819462_59932639dup	truncated_duplication	1-2	1-2	FALSE	FALSE	FALSE	NA	TRUE	TRUE	FALSE	NA	X	LY-2584702	FALSE
EOC1117	TP53	loss	TP53:NM_000546.6:exon8:c.830G>T:p.C277F	chr17:7673790C>A	nonsynonymous_SNV	NA	NA	TRUE	TRUE	FALSE	NA	TRUE	TRUE	NA	TRUE	IVA	Adavosertib	TRUE
EOC1117	TSC2	loss	PKD1:ENST00000262304:antisense::TSC2:ENST00000219476:e.25	chr16:2076261::chr16:2110607	fusion_from_unknown	3	2	FALSE	FALSE	FALSE	NA	FALSE	TRUE	NA	FALSE	IIIA	Everolimus	FALSE
EOC1119	AKT3	gain	AKT3:amp	NA	amplification	1-4	8-13	FALSE	FALSE	FALSE	NA	FALSE	FALSE	NA	NA	X	Afuresertib, Capivasertib, Ipatasertib, MK-2206, Triciribine Phosphate, Uprosertib	FALSE
EOC1119	CCNE1	gain	CCNE1:amp	NA	amplification	2	6-18	TRUE	FALSE	FALSE	NA	FALSE	TRUE	TRUE	NA	IVA	Lunresertib + Camonsertib	TRUE
EOC1119	CCNE1	gain	CCNE1:ENST00000262643:e.8::intergenic	chr19:29821857::chr19:31853980	truncated_transcripts	7-10	2-3	TRUE	FALSE	TRUE	NA	FALSE	TRUE	TRUE	NA	X	Lunresertib	TRUE
EOC1119	CD47	gain	intergenic::CD47:ENST00000361309:e.4	chr3:107896002::chr3:108069594	fusion_from_unknown	3	1	FALSE	FALSE	FALSE	NA	FALSE	TRUE	FALSE	NA	X	Magrolimab	FALSE
EOC1119	EGFL7	gain	EGFL7:amp	NA	amplification	0	7-14	FALSE	FALSE	FALSE	NA	FALSE	FALSE	NA	NA	X	Parsatuzumab	FALSE
EOC1119	EPHA2	gain	EPHA2:ENST00000358432:e.10::FBXO42:ENST00000375592:e.5	chr1:16133552::chr1:16269617	fusion	2-6	1-2	FALSE	FALSE	FALSE	NA	TRUE	TRUE	FALSE	NA	IVB	Dasatinib, Regorafenib, Vandetanib	FALSE
EOC1119	EPHA4	gain	EPHA4:ENST00000281821:e.3::intergenic	chr2:221551744::chr2:223643881	truncated_transcripts	6	1	FALSE	FALSE	FALSE	NA	FALSE	TRUE	FALSE	NA	X	Vandetanib	FALSE
EOC1119	EPHA8	gain	intergenic::EPHA8:ENST00000166244:e.3	chr1:13633260::chr1:22570910	fusion_from_unknown	1-4	1-2	FALSE	FALSE	FALSE	NA	FALSE	TRUE	FALSE	NA	IVB	Vandetanib	FALSE
EOC1119	FYN	gain	FYN:ENST00000354650:e.1_2dup	chr6:111816749_111944512dup	truncated_duplication	1-2	1-2	FALSE	FALSE	FALSE	NA	TRUE	FALSE	FALSE	NA	X	Dasatinib, ENMD-981693, Ilorasertib, JNJ-26483327	FALSE
EOC1119	GRIN2B	gain	GRIN2B:NM_000834.5:exon13:c.2540G>A:p.R847Q	chr12:13567083C>T	nonsynonymous_SNV	NA	NA	FALSE	FALSE	FALSE	NA	FALSE	TRUE	FALSE	NA	X	Memantine	FALSE
EOC1119	GRIN2B	gain	GRIN2B:amp	NA	amplification	2	8-11	FALSE	FALSE	FALSE	NA	FALSE	FALSE	NA	NA	X	Memantine	FALSE
EOC1119	KDM6A	loss	KDM6A:ENST00000611820:e.11_13dup;KDM6A:ENST00000611820:e.9_13del;KDM6A:ENST00000611820:e.11del	chrX:45058867_45060338dup;chrX:45044973_45060230del;chrX:45058998_45059048del	multiple	0	NA	TRUE	TRUE	TRUE	NA	TRUE	TRUE	NA	TRUE	IVA	Tazemetostat	TRUE
EOC1119	KLRC1	gain	KLRC1:amp	NA	amplification	2	8-11	FALSE	FALSE	FALSE	NA	FALSE	FALSE	NA	NA	X	Monalizumab	FALSE
EOC1119	KRAS	gain	KRAS:amp	NA	amplification	2	10-11	FALSE	FALSE	TRUE	NA	FALSE	TRUE	TRUE	NA	IVB	Adagrasib, Sotorasib	TRUE
EOC1119	LAG3	gain	LAG3:amp	NA	amplification	6-7	10-14	FALSE	FALSE	FALSE	NA	TRUE	FALSE	NA	NA	X	Fianlimab, Relatlimab	FALSE
EOC1119	NDUFA9	gain	NDUFA9:amp	NA	amplification	2	10-11	FALSE	TRUE	TRUE	NA	FALSE	TRUE	TRUE	NA	X	Metformin	TRUE
EOC1119	NDUFAF2	gain	NDUFAF2:ENST00000296597:e.1::DEPDC1B:ENST00000265036:antisense	chr5:60614646::chr5:60960334	truncated_transcripts	2	0	FALSE	FALSE	FALSE	NA	FALSE	TRUE	FALSE	NA	X	Metformin	FALSE
EOC1119	NF1	loss	NF1:ENST00000358273:e.8::SLC7A9:ENST00000023064:e.7	chr17:31187038::chr19:32860660	fusion	1	1	FALSE	FALSE	FALSE	NA	FALSE	TRUE	NA	FALSE	IIIA	Selumetinib	FALSE
EOC1119	NRP1	gain	intergenic::NRP1:ENST00000374867:e.12;NRP1:ENST00000374867:e.11::MALRD1:ENST00000454679:antisense;NRP1:ENST00000374867:e.11::intergenic	chr10:7064506::chr10:33202252;chr10:19366358::chr10:33202093;chr10:20381927::chr10:33201063;chr10:33202304::chr10:36982436	multiple	5	NA	FALSE	FALSE	FALSE	NA	FALSE	TRUE	FALSE	NA	X	Vesencumab	FALSE
EOC1119	PSMA7	gain	TAF4:ENST00000252996:antisense::PSMA7:ENST00000370873:e.2	chr20:62043819::chr20:62150629	fusion_from_unknown	3	0	FALSE	FALSE	FALSE	NA	FALSE	TRUE	FALSE	NA	X	Bortezomib, Ixazomib, Ixazomib Citrate, Marizomib, Oprozomib	FALSE
EOC1119	PSMA8	gain	PSMA8:NM_001025096.2:exon3:c.251T>C:p.V84A	chr18:26151879T>C	nonsynonymous_SNV	NA	NA	FALSE	FALSE	FALSE	NA	FALSE	TRUE	FALSE	NA	X	Bortezomib, Ixazomib, Ixazomib Citrate, Marizomib, Oprozomib	FALSE
EOC1119	PSMA8	gain	PSMA8:amp	NA	amplification	2	11-15	FALSE	FALSE	FALSE	NA	TRUE	FALSE	NA	NA	X	Bortezomib, Ixazomib, Ixazomib Citrate, Marizomib, Oprozomib	FALSE
EOC1119	PTK6	gain	PTK6:NM_005975.4:exon4:c.519C>G:p.H173Q	chr20:63533702G>C	nonsynonymous_SNV	NA	NA	FALSE	FALSE	FALSE	NA	FALSE	FALSE	TRUE	NA	X	Vandetanib	FALSE
EOC1119	RAD51B	loss	DNMT3L:ENST00000628202:antisense::RAD51B:ENST00000471583:e.8;RAD51B:ENST00000471583:e.8dup;intergenic::RAD51B:ENST00000471583:e.8;RAD51B:ENST00000471583:e.9::DNMT3L:ENST00000628202:e.3	chr14:67986207::chr21:44260378;chr14:68111965_68299618dup;chr14:68226937::chr14:68645864;chr14:68455127::chr21:44260842	multiple	1-2	1-2	FALSE	FALSE	FALSE	NA	TRUE	TRUE	NA	FALSE	IIIA	Olaparib	FALSE
EOC1119	SRC	gain	CTNNBL1:ENST00000361383:e.1::SRC:ENST00000373578:e.6	chr20:37388783::chr20:37727171	fusion	3-8	1-2	FALSE	FALSE	FALSE	NA	TRUE	TRUE	FALSE	NA	IVB	Bosutinib, Dasatinib, Elzovantinib, Vandetanib	FALSE
EOC1119	TP53	loss	TP53:NM_000546.6:exon5:c.524G>A:p.R175H	chr17:7675088C>T	nonsynonymous_SNV	NA	NA	TRUE	TRUE	TRUE	NA	TRUE	TRUE	NA	TRUE	IVA	Adavosertib	TRUE
EOC112	ADRB3	gain	ADRB3:amp	NA	amplification	0	18-27	FALSE	FALSE	FALSE	NA	TRUE	FALSE	NA	NA	X	Carvedilol	FALSE
EOC112	ADRM1	gain	ADRM1:NM_007002.4:exon4:c.390delC:p.P132Rfs*19	chr20:62306255AC>A	frameshift_deletion	NA	NA	FALSE	FALSE	FALSE	NA	FALSE	FALSE	FALSE	NA	X	Bortezomib, Ixazomib, Ixazomib Citrate, Oprozomib	FALSE
EOC112	BRCA2	loss	BRCA2:NM_000059.4:exon25:c.9302T>C:p.L3101P	NA	germline	NA	NA	NA	NA	NA	NA	NA	TRUE	NA	TRUE	IA	Niraparib, Olaparib, Olaparib + Bevacizumab, Rucaparib	TRUE
EOC112	CSF1	gain	CSF1:amp	NA	amplification	3	6-7	FALSE	FALSE	FALSE	NA	FALSE	FALSE	NA	NA	X	PD-360324	FALSE
EOC112	CUL4A	gain	CUL4A:NM_001008895.4:exon2:c.211C>G:p.R71G	chr13:113210035C>G	nonsynonymous_SNV	NA	NA	FALSE	FALSE	FALSE	NA	TRUE	FALSE	TRUE	NA	X	Lenalidomide, Thalidomide	FALSE
EOC112	EPHA6	gain	EPHA6:ENST00000389672:e.3::intergenic	chr3:95787744::chr3:97006513	truncated_transcripts	6	1	FALSE	FALSE	FALSE	NA	TRUE	TRUE	FALSE	NA	X	Vandetanib	FALSE
EOC112	FGFR1	gain	FGFR1:amp	NA	amplification	0	18-27	FALSE	FALSE	FALSE	NA	TRUE	FALSE	NA	NA	X	AZD-4547, Brivanib, Brivanib Alaninate, ENMD-981693, Erdafitinib, Fexagratinib, Futibatinib, Infigratinib, Lucitanib, Pazopanib, Pemigatinib, Regorafenib, Rogaratinib, XL-999	FALSE
EOC112	HDAC9	gain	intergenic::HDAC9:ENST00000686413:e.22	chr7:9789477::chr7:18870244	multiple	0-1	1	FALSE	FALSE	FALSE	NA	TRUE	TRUE	FALSE	NA	X	Belinostat, CUDC-101, Entinostat, Panobinostat	FALSE
EOC112	HSP90AB1	gain	HSP90AB1:amp	NA	amplification	0	9-10	FALSE	FALSE	TRUE	NA	FALSE	TRUE	TRUE	NA	X	Retaspimycin, Retaspimycin Hydrochloride, SNX 5422, Tanespimycin	TRUE
EOC112	IDO1	gain	IDO1:amp	NA	amplification	0	11-14	FALSE	FALSE	FALSE	NA	TRUE	FALSE	NA	NA	X	Linrodostat	FALSE
EOC112	MAP2K1	gain	intergenic::MAP2K1:ENST00000307102:e.2	chr6:49687912::chr15:66395639	fusion_from_unknown	2-3	1-2	FALSE	FALSE	FALSE	NA	TRUE	TRUE	FALSE	NA	IIIB	Cobimetinib, Trametinib	FALSE
EOC112	NDUFA9	gain	NDUFA9:NM_005002.5:exon3:c.223C>A:p.R75S	chr12:4654827C>A	nonsynonymous_SNV	NA	NA	FALSE	TRUE	TRUE	NA	TRUE	TRUE	TRUE	NA	X	Metformin	TRUE
EOC112	NDUFAF1	gain	NDUFAF1:ENST00000260361:e.4::intergenic	chr8:125791752::chr15:41388066	truncated_transcripts	2	1-2	FALSE	FALSE	FALSE	NA	TRUE	TRUE	FALSE	NA	X	Metformin	FALSE
EOC112	NDUFB4	gain	HGD:ENST00000283871:antisense::NDUFB4:ENST00000184266:e.2	chr3:120594477::chr3:120672203	fusion_from_unknown	5-6	2	FALSE	FALSE	FALSE	NA	TRUE	TRUE	FALSE	NA	X	Metformin	FALSE
EOC112	PDE4C	gain	PDE4C:NM_001098818.4:exon10:c.1072A>G:p.S358G	chr19:18218396T>C	nonsynonymous_SNV	NA	NA	FALSE	FALSE	FALSE	NA	TRUE	FALSE	FALSE	NA	X	Roflumilast	FALSE
EOC112	PTK6	gain	PTK6:amp	NA	amplification	2	8	FALSE	FALSE	FALSE	NA	TRUE	FALSE	NA	NA	X	Vandetanib	FALSE
EOC112	RPS6KB1	gain	RPS6KB1:NM_003161.4:exon13:c.1147G>C:p.D383H	chr17:59940863G>C	nonsynonymous_SNV	NA	NA	FALSE	TRUE	TRUE	NA	TRUE	TRUE	TRUE	NA	X	LY-2584702	TRUE
EOC112	SRMS	gain	SRMS:amp	NA	amplification	2	13-15	FALSE	FALSE	FALSE	NA	TRUE	FALSE	NA	NA	X	Dasatinib, ENMD-981693, Ilorasertib	FALSE
EOC112	TP53	loss	TP53:NM_000546.6:exon8:c.818G>A:p.R273H	chr17:7673802C>T	nonsynonymous_SNV	NA	NA	FALSE	TRUE	TRUE	NA	TRUE	TRUE	NA	TRUE	IVA	Adavosertib	TRUE
EOC112	VEGFA	gain	VEGFA:amp	NA	amplification	0	9-10	FALSE	FALSE	FALSE	NA	FALSE	FALSE	NA	NA	X	Bevacizumab	FALSE
EOC112	WEE1	gain	WEE1:ENST00000450114:e.5::intergenic;intergenic::WEE1:ENST00000450114:e.6	chr11:9577690::chr11:15496057;chr5:24337780::chr11:9577704	multiple	3-4	0-1	FALSE	FALSE	FALSE	NA	TRUE	TRUE	FALSE	NA	X	Adavosertib	FALSE
EOC1120	CCDC6	gain	CCDC6:ENST00000263102:antisense::CCDC6:ENST00000263102:e.3;CCDC6:ENST00000263102:antisense::CCDC6:ENST00000263102:e.2	chr10:59839119::chr10:59973114	fusion_from_unknown	2	1	FALSE	FALSE	FALSE	FALSE	FALSE	TRUE	FALSE	NA	IVB	Pralsetinib, Selpercatinib	FALSE
EOC1120	CCNE1	gain	CCNE1:amp	NA	amplification	1	9-21	FALSE	TRUE	FALSE	TRUE	TRUE	TRUE	TRUE	NA	IVA	Lunresertib + Camonsertib	TRUE
EOC1120	CD3G	gain	DLG2:ENST00000376104:e.17::CD3G:ENST00000532917:e.2;CD3G:ENST00000532917:e.1::intergenic	chr11:83820059::chr11:118345684;chr11:112272862::chr11:118345820	balanced_translocation	0	1	FALSE	FALSE	FALSE	TRUE	FALSE	TRUE	FALSE	NA	X	Catumaxomab, Teclistamab	FALSE
EOC1120	DDB1	gain	DDB1:ENST00000301764:e.1::BTBD2:ENST00000255608:antisense	chr11:61331865::chr19:2018930	truncated_transcripts	1	1	FALSE	FALSE	FALSE	TRUE	FALSE	TRUE	FALSE	NA	X	Lenalidomide, Thalidomide	FALSE
EOC1120	KRAS	gain	KRAS:amp	NA	amplification	1	49-57	FALSE	TRUE	FALSE	TRUE	TRUE	TRUE	TRUE	NA	IVB	Adagrasib, Sotorasib	TRUE
EOC1120	MET	gain	MET:NM_000245.4:exon21:c.4049T>G:p.V1350G	chr7:116796000T>G	nonsynonymous_SNV	NA	NA	FALSE	TRUE	FALSE	TRUE	TRUE	TRUE	TRUE	NA	IIIB	Capmatinib, Crizotinib, Tepotinib	TRUE
EOC1120	NDUFA13	gain	NDUFA13:NM_015965.7:exon3:c.241C>T:p.R81W	chr19:19527348C>T	nonsynonymous_SNV	NA	NA	FALSE	TRUE	FALSE	TRUE	TRUE	TRUE	TRUE	NA	X	Metformin	TRUE
EOC1120	NRG1	gain	NRG1:ENST00000520407:e.1::MBD2:ENST00000256429:e.2	chr8:32077180::chr18:54215298	fusion	1	1	FALSE	FALSE	FALSE	TRUE	FALSE	TRUE	FALSE	NA	II	Zenocutuzumab	FALSE
EOC1120	PIK3R1	gain	intergenic::PIK3R1:ENST00000521381:e.5	chr5:68274376::chr5:68440703	fusion_from_unknown	3	1	FALSE	FALSE	FALSE	TRUE	FALSE	TRUE	FALSE	NA	X	Apitolisib, BGT-226, Dactolisib, Gedatolisib, Omipalisib, PF-04691502, Pictilisib, Pilaralisib, SF-1126, Sonolisib, Voxtalisib	FALSE
EOC1120	PTK2	gain	PTK2:amp	NA	amplification	3-4	4-5	FALSE	TRUE	FALSE	FALSE	FALSE	TRUE	TRUE	NA	X	Defactinib, GSK-2256098	TRUE
EOC1120	TP53	loss	TP53:NM_000546.6:exon8:c.916C>T:p.R306X	chr17:7673704G>A	stopgain	NA	NA	FALSE	TRUE	FALSE	TRUE	TRUE	TRUE	NA	TRUE	IVA	Adavosertib	TRUE
EOC1122	FBXW7	loss	FBXW7:NM_001349798.2:exon12:c.1514G>A:p.R505H	chr4:152326136C>T	nonsynonymous_SNV	NA	NA	TRUE	FALSE	TRUE	NA	TRUE	TRUE	NA	TRUE	IVA	Lunresertib + Camonsertib	TRUE
EOC1122	FLT4	gain	FLT4:NM_182925.5:exon10:c.1339G>A:p.A447T	chr5:180625951C>T	nonsynonymous_SNV	NA	NA	FALSE	FALSE	FALSE	NA	FALSE	FALSE	FALSE	NA	X	Axitinib, BMS-690514, Brivanib, Brivanib Alaninate, Catequentinib, Cediranib, CEP-11981, Dovitinib, Famitinib, Foretinib, Fruquintinib, Glesatinib, Ilorasertib, JNJ-26483327, Lenvatinib, Lenvatinib Mesylate, Lucitanib, Pazopanib, Regorafenib, Sorafenib, Sorafenib Tosylate, Sunitinib, Sunitinib Malate, Vandetanib, Vatalanib, XL-820, XL-999	FALSE
EOC1122	HDAC9	gain	intergenic::HDAC9:ENST00000441542:e.2	chr7:18432779::chr20:60825724	fusion_from_unknown	4	0	FALSE	FALSE	FALSE	NA	FALSE	TRUE	FALSE	NA	X	Belinostat, CUDC-101, Entinostat, Panobinostat	FALSE
EOC1122	NF1	loss	NF1:NM_001042492.3:exon25:c.3233C>G:p.S1078X	chr17:31232108C>G	stopgain	NA	NA	TRUE	TRUE	TRUE	NA	TRUE	TRUE	NA	TRUE	IIIA	Selumetinib	TRUE
EOC1122	TP53	loss	TP53:ENST00000269305:e.2_6dup	chr17:7674433_7681867dup	inframe_duplication	0	2-3	TRUE	FALSE	TRUE	NA	FALSE	TRUE	NA	TRUE	IVA	Adavosertib	TRUE
EOC1127	EPHA5	gain	EPHA5:ENST00000613740:e.3::DPP10:ENST00000410059:antisense;intergenic::EPHA5:ENST00000613740:e.15	chr2:115837684::chr4:65592413;chr4:65344010::chr4:68714607	multiple	5	1	FALSE	FALSE	FALSE	NA	TRUE	TRUE	FALSE	NA	IVB	Vandetanib	FALSE
EOC1127	FN1	gain	FN1:NM_212482.4:exon25:c.4012G>A:p.V1338I	chr2:215392988C>T	nonsynonymous_SNV	NA	NA	TRUE	TRUE	FALSE	NA	TRUE	TRUE	TRUE	NA	X	L19SIP 131I	TRUE
EOC1127	KDM6A	loss	KDM6A:ENST00000611820:e.2::OTC:ENST00000039007:antisense	chrX:38401032::chrX:44940951	truncated_transcripts	3	2	FALSE	FALSE	FALSE	NA	FALSE	FALSE	NA	FALSE	X	Tazemetostat	FALSE
EOC1127	NDUFC2	gain	NDUFC2:amp	NA	amplification	1	8	TRUE	FALSE	FALSE	NA	TRUE	TRUE	TRUE	NA	X	Metformin	TRUE
EOC1127	NTRK1	gain	MPRIP:ENST00000651222:e.1::NTRK1:ENST00000524377:e.4	chr1:156865580::chr17:17054322	fusion	4	0	FALSE	FALSE	FALSE	NA	FALSE	TRUE	FALSE	NA	IC	Entrectinib, Larotrectinib, Repotrectinib	FALSE
EOC1127	RARB	gain	GOLGA4:ENST00000361924:antisense::RARB:ENST00000330688:e.6	chr3:25581124::chr3:37327656	fusion_from_unknown	4-5	0-1	FALSE	FALSE	FALSE	NA	TRUE	TRUE	FALSE	NA	IVB	Tretinoin	FALSE
EOC1127	TP53	loss	TP53:NM_000546.6:exon6:c.613T>C:p.Y205H	chr17:7674918A>G	nonsynonymous_SNV	NA	NA	TRUE	TRUE	FALSE	NA	TRUE	TRUE	NA	TRUE	IVA	Adavosertib	TRUE
EOC1129	AKT2	gain	AKT2:amp	NA	amplification	3	4-7	FALSE	FALSE	TRUE	NA	FALSE	TRUE	TRUE	NA	IVB	Capivasertib	TRUE
EOC1129	AKT3	gain	AKT3:ENST00000673466:e.2::SDCCAG8:ENST00000366541:antisense	chr1:243446220::chr1:243727097	truncated_transcripts	2	1	FALSE	FALSE	FALSE	NA	FALSE	FALSE	FALSE	NA	X	Afuresertib, Capivasertib, Ipatasertib, MK-2206, Triciribine Phosphate, Uprosertib	FALSE
EOC1129	EPHA8	gain	EPHA8:NM_020526.5:exon3:c.253C>T:p.R85C	chr1:22576310C>T	nonsynonymous_SNV	NA	NA	FALSE	FALSE	FALSE	NA	FALSE	TRUE	FALSE	NA	IVB	Vandetanib	FALSE
EOC1129	MST1R	gain	MST1R:NM_002447.4:exon1:c.619G>A:p.V207M	chr3:49902991C>T	nonsynonymous_SNV	NA	NA	FALSE	FALSE	FALSE	NA	TRUE	FALSE	TRUE	NA	X	Glesatinib, MK-8033, Narnatumab	FALSE
EOC1129	NDUFC2	gain	NDUFC2:amp	NA	amplification	1	39-44	TRUE	TRUE	TRUE	NA	TRUE	TRUE	TRUE	NA	X	Metformin	TRUE
EOC1129	PSMC4	gain	PSMC4:amp	NA	amplification	3	4-7	FALSE	FALSE	TRUE	NA	FALSE	TRUE	TRUE	NA	X	Bortezomib, Ixazomib, Ixazomib Citrate, Oprozomib	TRUE
EOC1129	ROS1	gain	ROS1:NM_001378902.1:exon33:c.5308G>C:p.D1770H	chr6:117329369C>G	nonsynonymous_SNV	NA	NA	FALSE	FALSE	FALSE	NA	FALSE	FALSE	FALSE	NA	X	Cabozantinib, Ceritinib, Crizotinib, Entrectinib, Lorlatinib, Repotrectinib, Taletrectinib	FALSE
EOC1129	TNC	gain	TNC:NM_002160.4:exon10:c.3205G>T:p.A1069S	chr9:115073612C>A	nonsynonymous_SNV	NA	NA	FALSE	FALSE	FALSE	NA	TRUE	FALSE	TRUE	NA	X	F16SIP 131I	FALSE
EOC1129	TP53	loss	TP53:NM_000546.6:exon6:c.659A>G:p.Y220C	chr17:7674872T>C	nonsynonymous_SNV	NA	NA	TRUE	TRUE	TRUE	NA	TRUE	TRUE	NA	TRUE	IVA	Rezatapopt	TRUE
EOC1130	AKT2	gain	AKT2:amp	NA	amplification	1	33-36	FALSE	FALSE	TRUE	NA	TRUE	TRUE	TRUE	NA	IVB	Capivasertib	TRUE
EOC1130	ATP4A	gain	ATP4A:amp	NA	amplification	5-6	15-17	FALSE	FALSE	FALSE	NA	TRUE	FALSE	NA	NA	X	Rabeprazole	FALSE
EOC1130	BCL2L1	gain	BCL2L1:amp	NA	amplification	2	28-31	FALSE	FALSE	FALSE	NA	TRUE	FALSE	NA	NA	X	Navitoclax	FALSE
EOC1130	CCNE1	gain	CCNE1:amp	NA	amplification	4	44-48	FALSE	FALSE	TRUE	NA	TRUE	TRUE	TRUE	NA	IVA	Lunresertib + Camonsertib	TRUE
EOC1130	CD22	gain	CD22:amp	NA	amplification	4-5	15-16	FALSE	FALSE	TRUE	NA	TRUE	TRUE	TRUE	NA	X	Epratuzumab	TRUE
EOC1130	HCK	gain	HCK:amp	NA	amplification	2	28-31	FALSE	FALSE	FALSE	NA	TRUE	FALSE	NA	NA	X	Bosutinib, Dasatinib, ENMD-981693, Ilorasertib	FALSE
EOC1130	NDUFA13	gain	NDUFA13:amp	NA	amplification	7	9	FALSE	FALSE	FALSE	NA	TRUE	FALSE	NA	NA	X	Metformin	FALSE
EOC1130	NDUFA7	gain	intergenic::NDUFA7:ENST00000301457:e.3	chr10:121672332::chr19:8316509	fusion_from_unknown	25	1	FALSE	FALSE	FALSE	NA	TRUE	TRUE	FALSE	NA	X	Metformin	FALSE
EOC1130	NDUFA7	gain	NDUFA7:amp	NA	amplification	2	26-28	FALSE	FALSE	TRUE	NA	TRUE	TRUE	TRUE	NA	X	Metformin	TRUE
EOC1130	NRG1	gain	intergenic::NRG1:ENST00000405005:e.2	chr8:32280924::chr20:31450561	fusion_from_unknown	4	3	FALSE	FALSE	FALSE	NA	FALSE	TRUE	FALSE	NA	II	Zenocutuzumab	FALSE
EOC1130	PDE4C	gain	PDE4C:amp	NA	amplification	6	7	FALSE	FALSE	FALSE	NA	FALSE	FALSE	NA	NA	X	Roflumilast	FALSE
EOC1130	PIK3R2	gain	PIK3R2:amp	NA	amplification	6	7	FALSE	FALSE	FALSE	NA	FALSE	TRUE	FALSE	NA	X	Apitolisib, BGT-226, Dactolisib, Gedatolisib, Omipalisib, PF-04691502, Pictilisib, Pilaralisib, SF-1126, Sonolisib, Voxtalisib	FALSE
EOC1130	PSMC4	gain	PSMC4:amp	NA	amplification	2	39-42	FALSE	FALSE	TRUE	NA	TRUE	TRUE	TRUE	NA	X	Bortezomib, Ixazomib, Ixazomib Citrate, Oprozomib	TRUE
EOC1130	PSMD8	gain	PSMD8:amp	NA	amplification	2	39-42	FALSE	FALSE	TRUE	NA	TRUE	TRUE	TRUE	NA	X	Bortezomib, Ixazomib, Ixazomib Citrate, Oprozomib	TRUE
EOC1130	RARB	gain	RARB:ENST00000687676:e.5::intergenic	chr3:23788776::chr3:25238119	truncated_transcripts	5-6	1	FALSE	FALSE	FALSE	NA	TRUE	TRUE	FALSE	NA	X	Tretinoin	FALSE
EOC1130	TP53	loss	TP53:NM_000546.6:exon5:c.501delG:p.Q167Hfs*3	chr17:7675110GC>G	frameshift_deletion	NA	NA	FALSE	FALSE	TRUE	NA	TRUE	TRUE	NA	TRUE	IVA	Adavosertib	TRUE
EOC1132	GRIN2B	gain	GRIN2B:NM_000834.5:exon14:c.2779C>T:p.R927W	chr12:13564459G>A	nonsynonymous_SNV	NA	NA	FALSE	FALSE	FALSE	NA	TRUE	TRUE	FALSE	NA	X	Memantine	FALSE
EOC1132	GRIN3B	gain	GRIN3B:NM_138690.3:exon9:c.2930delC:p.Q979Sfs*106	chr19:1009399GC>G	frameshift_deletion	NA	NA	FALSE	FALSE	FALSE	NA	TRUE	FALSE	FALSE	NA	X	Memantine	FALSE
EOC1132	NF1	loss	NF1:ENST00000358273:e.2::PPP1R3G:ENST00000405617:e.1;intergenic::NF1:ENST00000358273:e.2	chr6:5079398::chr17:31158450;chr6:29809964::chr17:31154178	multiple	0	1-2	TRUE	TRUE	TRUE	NA	TRUE	TRUE	NA	TRUE	IIIA	Selumetinib	TRUE
EOC1132	TP53	loss	TP53:NM_000546.6:exon7:c.742C>T:p.R248W	chr17:7674221:G>A	nonsynonymous_SNV	NA	NA	TRUE	TRUE	TRUE	FALSE	TRUE	TRUE	NA	TRUE	IVA	Adavosertib	TRUE
EOC1133	BRCA2	loss	BRCA2:NM_000059.4:exon18:c.8023A>G:p.I2675V	chr13:32363225A>G	nonsynonymous_SNV	NA	NA	TRUE	TRUE	FALSE	NA	TRUE	TRUE	NA	TRUE	IA	Niraparib, Olaparib, Olaparib + Bevacizumab, Rucaparib	TRUE
EOC1133	EPCAM	gain	EPCAM:ENST00000263735:e.1del	chr2:47365643_47370380del	5prime_deletion	0-1	2	FALSE	FALSE	FALSE	NA	TRUE	TRUE	FALSE	NA	X	Catumaxomab, Edrecolomab	FALSE
EOC1133	EPHB6	gain	EPHB6:NM_004445.6:exon7:c.589G>A:p.V197I	chr7:142864389G>A	nonsynonymous_SNV	NA	NA	FALSE	FALSE	FALSE	NA	TRUE	FALSE	TRUE	NA	X	Vandetanib	FALSE
EOC1133	ERBB4	gain	ERBB4:NM_005235.3:exon5:c.593G>A:p.W198X	chr2:211750668C>T	stopgain	NA	NA	FALSE	FALSE	FALSE	NA	FALSE	FALSE	FALSE	NA	X	AC-480, Afatinib, BMS-690514, Dacomitinib, Dacomitinib Anhydrous, JNJ-26483327, Neratinib, Poziotinib, Vandetanib	FALSE
EOC1133	IMPDH2	gain	IMPDH2:NM_000884.3:exon1:c.74_75delinsCT:p.N25T	chr3:49029276GT>AG	inframe_substitution	NA	NA	FALSE	FALSE	FALSE	NA	FALSE	TRUE	FALSE	NA	X	Mycophenolate Mofetil	FALSE
EOC1133	LYN	gain	LYN:amp	NA	amplification	1-2	3-9	FALSE	FALSE	FALSE	NA	FALSE	FALSE	NA	NA	X	Bosutinib, Dasatinib, ENMD-981693, Ilorasertib, JNJ-26483327	FALSE
EOC1133	NBN	loss	NBN:ENST00000265433:e.2::intergenic	chr8:11399749::chr8:89982356	truncated_transcripts	2-5	1-2	FALSE	FALSE	FALSE	NA	TRUE	FALSE	NA	FALSE	X	Talazoparib	FALSE
EOC1133	PIK3R2	gain	PIK3R2:NM_005027.4:exon6:c.640C>G:p.L214V	chr19:18161320C>G	nonsynonymous_SNV	NA	NA	FALSE	FALSE	FALSE	NA	TRUE	FALSE	FALSE	NA	X	Apitolisib, BGT-226, Dactolisib, Gedatolisib, Omipalisib, PF-04691502, Pictilisib, Pilaralisib, SF-1126, Sonolisib, Voxtalisib	FALSE
EOC1133	PSMD12	gain	TSHZ2:ENST00000371497:antisense::PSMD12:ENST00000356126:e.5	chr17:67349453::chr20:53077239	fusion_from_unknown	2	1	FALSE	FALSE	FALSE	NA	FALSE	TRUE	FALSE	NA	X	Bortezomib, Ixazomib, Ixazomib Citrate, Oprozomib	FALSE
EOC1133	TP53	loss	TP53:NM_000546.6:exon7:c.764_766del:p.I255del	chr17:7674196GTGA>G	inframe_deletion	NA	NA	TRUE	TRUE	FALSE	NA	TRUE	TRUE	NA	TRUE	IVA	Adavosertib	TRUE
EOC115	ADA	gain	ADA:amp	NA	amplification	3	5	FALSE	FALSE	FALSE	NA	TRUE	FALSE	NA	NA	X	Pentostatin	FALSE
EOC115	AKT2	gain	AKT2:amp	NA	amplification	2	7-8	FALSE	FALSE	FALSE	NA	TRUE	TRUE	TRUE	NA	IVB	Capivasertib	TRUE
EOC115	ATP4A	gain	ATP4A:amp	NA	amplification	2	13-14	FALSE	FALSE	FALSE	NA	TRUE	FALSE	NA	NA	X	Rabeprazole	FALSE
EOC115	CCNE1	gain	CCNE1:amp	NA	amplification	2	7	FALSE	FALSE	FALSE	NA	TRUE	TRUE	FALSE	NA	IVA	Lunresertib + Camonsertib	FALSE
EOC115	CD22	gain	CD22:amp	NA	amplification	2	13-14	FALSE	TRUE	FALSE	NA	TRUE	TRUE	TRUE	NA	X	Epratuzumab	TRUE
EOC115	PSMC4	gain	PSMC4:amp	NA	amplification	2	25-28	FALSE	TRUE	FALSE	NA	TRUE	TRUE	TRUE	NA	X	Bortezomib, Ixazomib, Ixazomib Citrate, Oprozomib	TRUE
EOC115	PSMD8	gain	PSMD8:amp	NA	amplification	2	21-23	FALSE	TRUE	FALSE	NA	TRUE	TRUE	TRUE	NA	X	Bortezomib, Ixazomib, Ixazomib Citrate, Oprozomib	TRUE
EOC115	SDC4	gain	SDC4:amp	NA	amplification	3	10	FALSE	FALSE	FALSE	NA	TRUE	FALSE	NA	NA	X	Repotrectinib	FALSE
EOC115	TP53	loss	TP53:NM_000546.6:exon6:c.584T>A:p.I195N	chr17:7674947A>T	nonsynonymous_SNV	NA	NA	FALSE	TRUE	FALSE	NA	TRUE	TRUE	NA	TRUE	IVA	Adavosertib	TRUE
EOC118	ALK	gain	FOSL2:ENST00000264716:antisense::ALK:ENST00000389048:e.5	chr2:28386153::chr2:29436450	fusion_from_unknown	4	1	FALSE	FALSE	FALSE	NA	TRUE	TRUE	FALSE	NA	IIIA	Crizotinib, Alectinib, Brigatinib, Ceritinib, Lorlatinib	FALSE
EOC118	CCNE1	gain	CCNE1:amp	NA	amplification	3-4	4-8	FALSE	FALSE	TRUE	NA	FALSE	TRUE	TRUE	NA	IVA	Lunresertib + Camonsertib	TRUE
EOC118	CD47	gain	intergenic::CD47:ENST00000361309:e.10;intergenic::CD47:ENST00000361309:e.11	chr3:107857724::chr3:108050484;chr3:107982716::chr3:108049398	multiple	16-20	1-2	FALSE	FALSE	FALSE	NA	TRUE	TRUE	FALSE	NA	X	Magrolimab	FALSE
EOC118	CD47	gain	CD47:amp	NA	amplification	3-4	15-20	FALSE	FALSE	FALSE	NA	TRUE	FALSE	NA	NA	X	Magrolimab	FALSE
EOC118	CDK12	loss	CDK12:NM_016507.4:exon6:c.2590A>G:p.N864D	chr17:39501420A>G	nonsynonymous_SNV	NA	NA	TRUE	TRUE	TRUE	NA	TRUE	TRUE	NA	TRUE	IIIA	Olaparib, Talazoparib + Enzalutamide	TRUE
EOC118	CDK6	gain	ERVW-1:ENST00000603053:e.0::CDK6:ENST00000424848:e.4	chr7:92479804::chr7:92739106	promoter_hijacking	3	0	FALSE	FALSE	FALSE	NA	FALSE	TRUE	FALSE	NA	X	Abemaciclib, Palbociclib, Ribociclib	FALSE
EOC118	EPHA3	gain	EPHA3:NM_005233.6:exon14:c.2394C>A:p.Y798X	chr3:89449272C>A	stopgain	NA	NA	FALSE	FALSE	FALSE	NA	FALSE	FALSE	FALSE	NA	X	Vandetanib	FALSE
EOC118	EPHA5	gain	EPHA5:ENST00000613740:e.2::intergenic	chr4:65627586::chr4:65942910	truncated_transcripts	4	1	FALSE	FALSE	FALSE	NA	TRUE	FALSE	FALSE	NA	X	Vandetanib	FALSE
EOC118	EPHB1	gain	intergenic::EPHB1:ENST00000398015:e.16	chr3:135256206::chr3:135279903	fusion_from_unknown	5	2	FALSE	FALSE	FALSE	NA	TRUE	TRUE	FALSE	NA	IVB	Vandetanib	FALSE
EOC118	ERBB4	gain	intergenic::ERBB4:ENST00000342788:e.3	chr2:211089577::chr2:211983628	multiple	3	1	FALSE	FALSE	FALSE	NA	TRUE	TRUE	FALSE	NA	IVB	Afatinib, Dacomitinib, Neratinib, Poziotinib, Vandetanib	FALSE
EOC118	ESR1	gain	intergenic::ESR1:ENST00000206249:e.2	chr6:151763036::chr6:152108983	fusion_from_unknown	3-4	1-2	FALSE	FALSE	FALSE	NA	TRUE	TRUE	FALSE	NA	IIIB	Elacestrant	FALSE
EOC118	FLT1	gain	PAN3:ENST00000380958:antisense::FLT1:ENST00000282397:e.28	chr13:28230396::chr13:28309849	fusion_from_unknown	4	1	FALSE	FALSE	FALSE	NA	FALSE	TRUE	FALSE	NA	IVB	Pazopanib, Regorafenib, Sorafenib, Sunitinib, Vandetanib	FALSE
EOC118	GRIN2A	gain	intergenic::GRIN2A:ENST00000330684:e.12	chr16:9583560::chr16:9781869	fusion_from_unknown	3	1	FALSE	FALSE	FALSE	NA	FALSE	TRUE	FALSE	NA	X	Memantine	FALSE
EOC118	GRIN3A	gain	GRIN3A:NM_133445.3:exon9:c.3278T>C:p.L1093P	chr9:101573244A>G	nonsynonymous_SNV	NA	NA	FALSE	FALSE	FALSE	NA	FALSE	TRUE	FALSE	NA	X	Memantine	FALSE
EOC118	HCK	gain	HCK:NM_002110.5:exon7:c.550G>T:p.V184L	chr20:32083911G>T	nonsynonymous_SNV	NA	NA	FALSE	FALSE	FALSE	NA	TRUE	FALSE	FALSE	NA	X	Bosutinib, Dasatinib, ENMD-981693, Ilorasertib	FALSE
EOC118	HDAC5	gain	TOP1:ENST00000361337:e.3::HDAC5:ENST00000682912:e.17	chr17:44084276::chr20:41076043	fusion	4	0	FALSE	FALSE	FALSE	NA	FALSE	TRUE	FALSE	NA	X	Belinostat, CUDC-101, Entinostat, Panobinostat	FALSE
EOC118	HDAC7	gain	intergenic::HDAC7:ENST00000080059:e.2	chr12:47645334::chr12:47833329	multiple	9-10	0-2	FALSE	FALSE	FALSE	NA	FALSE	TRUE	FALSE	NA	X	Belinostat, CUDC-101, Entinostat, Panobinostat	FALSE
EOC118	HDAC7	gain	HDAC7:amp	NA	amplification	3-5	5-6	FALSE	FALSE	FALSE	NA	FALSE	FALSE	NA	NA	X	Belinostat, CUDC-101, Entinostat, Panobinostat	FALSE
EOC118	KMT2A	gain	KMT2A:NM_001197104.2:exon17:c.5197A>G:p.I1733V	chr11:118494306A>G	nonsynonymous_SNV	NA	NA	FALSE	FALSE	FALSE	NA	TRUE	FALSE	TRUE	NA	X	Revumenib	FALSE
EOC118	MAPK14	gain	MAPK14:ENST00000229794:e.3::SRPK1:ENST00000373825:antisense	chr6:35857302::chr6:36062570	truncated_transcripts	4	0-1	FALSE	FALSE	FALSE	NA	TRUE	TRUE	FALSE	NA	X	Ralimetinib	FALSE
EOC118	MTOR	gain	MTOR:ENST00000361445:e.1_8dup	chr1:11246909_11302289dup	truncated_duplication	2-3	2-3	FALSE	FALSE	FALSE	NA	TRUE	TRUE	FALSE	NA	X	Apitolisib, AZD-8055, BGT-226, Dactolisib, Everolimus, Gedatolisib, Omipalisib, PF-04691502, Ridaforolimus, Sapanisertib, SF-1126, Temsirolimus, Vistusertib, Voxtalisib	FALSE
EOC118	NDUFS2	gain	NDUFS2:amp	NA	amplification	4	4-6	FALSE	FALSE	FALSE	NA	FALSE	TRUE	TRUE	NA	X	Metformin	TRUE
EOC118	NTRK3	gain	NTRK3:ENST00000629765:e.13::intergenic	chr15:88109577::chr15:90679716	truncated_transcripts	4	1	FALSE	FALSE	FALSE	NA	FALSE	TRUE	FALSE	NA	X	Altiratinib, Entrectinib, Larotrectinib, Larotrectinib Sulfate, Repotrectinib, Selitrectinib, Taletrectinib, Zurletrectinib	FALSE
EOC118	PARP1	gain	intergenic::PARP1:ENST00000366794:e.3	chr1:222446960::chr1:226400846	fusion_from_unknown	4-5	2	FALSE	FALSE	FALSE	NA	TRUE	TRUE	FALSE	NA	IVB	Niraparib, Olaparib, Rucaparib, Talazoparib	FALSE
EOC118	PDE4C	gain	PDE4C:amp	NA	amplification	4	5-6	FALSE	FALSE	FALSE	NA	FALSE	FALSE	NA	NA	X	Roflumilast	FALSE
EOC118	PIK3R2	gain	SSBP4:ENST00000270061:e.1::PIK3R2:ENST00000222254:e.14	chr19:18168017::chr19:18425915	fusion	6-7	1	FALSE	FALSE	FALSE	NA	TRUE	TRUE	FALSE	NA	X	Apitolisib, BGT-226, Dactolisib, Gedatolisib, Omipalisib, PF-04691502, Pictilisib, Pilaralisib, SF-1126, Sonolisib, Voxtalisib	FALSE
EOC118	PSMA1	gain	SPON1:ENST00000576479:antisense::PSMA1:ENST00000396394:e.2	chr11:13991116::chr11:14573949	fusion_from_unknown	3-5	0-4	FALSE	FALSE	FALSE	NA	TRUE	TRUE	FALSE	NA	X	Bortezomib, Ixazomib, Ixazomib Citrate, Marizomib, Oprozomib	FALSE
EOC118	PSMD7	gain	PSMD7:NM_002811.5:exon7:c.736G>A:p.V246I	chr16:74305494G>A	nonsynonymous_SNV	NA	NA	FALSE	FALSE	FALSE	NA	TRUE	FALSE	TRUE	NA	X	Bortezomib, Ixazomib, Ixazomib Citrate, Oprozomib	FALSE
EOC118	PTK2	gain	AGO2:ENST00000220592:e.1::PTK2:ENST00000696786:e.10	chr8:140613564::chr8:140818678	fusion	5-6	0-1	FALSE	FALSE	FALSE	NA	FALSE	TRUE	FALSE	NA	X	Defactinib, GSK-2256098	FALSE
EOC118	RAD51B	loss	GALNT16:ENST00000448469:e.1::RAD51B:ENST00000471583:e.8;RAD51B:ENST00000471583:e.7::ACTN1:ENST00000394419:antisense	chr14:68007077::chr14:69296915;chr14:68123782::chr14:68927357	multiple	0-2	2	TRUE	TRUE	TRUE	NA	TRUE	TRUE	NA	TRUE	IIIA	Olaparib	TRUE
EOC118	TP53	loss	TP53:NM_000546.6:exon8:c.817C>T:p.R273C	chr17:7673803G>A	nonsynonymous_SNV	NA	NA	TRUE	TRUE	TRUE	NA	TRUE	TRUE	NA	TRUE	IVA	Adavosertib	TRUE
EOC118	TXNRD1	gain	PPHLN1:ENST00000549190:e.1::TXNRD1:ENST00000525566:e.13	chr12:42244422::chr12:104327439	fusion	3	1	FALSE	FALSE	FALSE	NA	FALSE	TRUE	FALSE	NA	IVB	Arsenic Trioxide	FALSE
EOC121	AKT2	gain	AKT2:amp	NA	amplification	1-2	2-9	FALSE	FALSE	TRUE	NA	FALSE	TRUE	TRUE	NA	IVB	Capivasertib	TRUE
EOC121	AKT3	gain	intergenic::AKT3:ENST00000673466:e.3	chr1:243794526::chr15:54926030	multiple	3-4	1	FALSE	FALSE	FALSE	NA	FALSE	TRUE	FALSE	NA	IVB	Capivasertib	FALSE
EOC121	ARID1A	loss	ARID1A:ENST00000324856:e.1::intergenic	chr1:26497324::chr1:26713995;chr1:26497579::chr1:26727781	multiple	3	1	FALSE	FALSE	FALSE	NA	FALSE	TRUE	NA	FALSE	IVA	PLX2853, Tazemetostat	FALSE
EOC121	AXL	gain	AXL:ENST00000301178:e.6::AXL:ENST00000301178:antisense	chr19:41233514::chr19:41235547	truncated_transcripts	2	4	FALSE	FALSE	FALSE	NA	FALSE	TRUE	FALSE	NA	X	Gilteritinib	FALSE
EOC121	CCNE1	gain	CCNE1:amp	NA	amplification	2	3-11	FALSE	FALSE	TRUE	NA	FALSE	TRUE	TRUE	NA	IVA	Lunresertib + Camonsertib	TRUE
EOC121	DDB1	gain	VPS37C:ENST00000301765:e.1::DDB1:ENST00000301764:e.11	chr11:61160940::chr11:61320875	fusion	3	1	FALSE	FALSE	FALSE	NA	FALSE	TRUE	FALSE	NA	X	Lenalidomide, Thalidomide	FALSE
EOC121	ERBB4	gain	intergenic::ERBB4:ENST00000342788:e.26;intergenic::ERBB4:ENST00000342788:e.2	chr2:211352793::chr2:211393092;chr2:212468612::chr2:212735107	multiple	2	1	FALSE	FALSE	FALSE	NA	FALSE	TRUE	FALSE	NA	IVB	Afatinib, Dacomitinib, Neratinib, Poziotinib, Vandetanib	FALSE
EOC121	ESR1	gain	ESR1:ENST00000206249:e.4_5dup	chr6:151885156_152017231dup	frameshift_duplication	1	1	FALSE	FALSE	FALSE	NA	FALSE	TRUE	FALSE	NA	X	Elacestrant, Fulvestrant	FALSE
EOC121	GSK3A	gain	GSK3A:amp	NA	amplification	0-1	2-8	FALSE	FALSE	FALSE	NA	FALSE	FALSE	NA	NA	X	LY-2090314	FALSE
EOC121	HDAC9	gain	HDAC9:NM_178425.4:exon4:c.362A>G:p.H121R	chr7:18590433A>G	nonsynonymous_SNV	NA	NA	FALSE	TRUE	FALSE	NA	TRUE	TRUE	TRUE	NA	X	Belinostat, CUDC-101, Entinostat, Panobinostat	TRUE
EOC121	HTR3C	gain	HTR3C:ENST00000318351:e.2::PARL:ENST00000317096:antisense	chr3:183844427::chr3:184054723	truncated_transcripts	4-6	1-2	FALSE	FALSE	FALSE	NA	TRUE	FALSE	FALSE	NA	X	Ramosetron	FALSE
EOC121	HTR3D	gain	HTR3D:amp	NA	amplification	2-4	3-5	FALSE	FALSE	FALSE	NA	FALSE	FALSE	NA	NA	X	Ramosetron	FALSE
EOC121	MKNK1	gain	MKNK1:NM_001135553.4:exon5:c.242G>A:p.R81Q	chr1:46576611C>T	nonsynonymous_SNV	NA	NA	FALSE	TRUE	TRUE	NA	TRUE	TRUE	TRUE	NA	X	Tomivosertib	TRUE
EOC121	NDUFA12	gain	NDUFA12:ENST00000327772:e.1_3del	chr12:94979341_95049920del	5prime_deletion	2	1	FALSE	FALSE	FALSE	NA	FALSE	TRUE	FALSE	NA	X	Metformin	FALSE
EOC121	NOTCH1	gain	NOTCH1:ENST00000651671:e.7del	chr9:136518150_136518256del	inframe_deletion	2	1	FALSE	FALSE	FALSE	NA	FALSE	TRUE	FALSE	NA	X	Brontictuzumab	FALSE
EOC121	NRG1	gain	intergenic::NRG1:ENST00000405005:e.2	chr8:31722649::chr8:75157254	fusion_from_unknown	1	3	FALSE	FALSE	FALSE	NA	FALSE	TRUE	FALSE	NA	II	Zenocutuzumab	FALSE
EOC121	NRP1	gain	NRP1:NM_003873.7:exon10:c.1676C>T:p.T559M	chr10:33207655G>A	nonsynonymous_SNV	NA	NA	FALSE	FALSE	FALSE	NA	FALSE	FALSE	FALSE	NA	X	Vesencumab	FALSE
EOC121	NRP1	gain	NRP1:NM_003873.7:exon10:c.1717G>A:p.G573R	chr10:33207614C>T	nonsynonymous_SNV	NA	NA	FALSE	FALSE	TRUE	NA	FALSE	TRUE	TRUE	NA	X	Vesencumab	TRUE
EOC121	PDE4D	gain	ARL15:ENST00000504924:e.1::PDE4D:ENST00000340635:e.2	chr5:54216029::chr5:60196926;chr5:54282453::chr5:60212483	multiple	1	1	FALSE	FALSE	FALSE	NA	FALSE	TRUE	FALSE	NA	X	Roflumilast	FALSE
EOC121	PSMA1	gain	intergenic::PSMA1:ENST00000396394:e.2	chr11:14640022::chr11:19294833	fusion_from_unknown	1	1	FALSE	FALSE	FALSE	NA	FALSE	TRUE	FALSE	NA	X	Bortezomib, Ixazomib, Ixazomib Citrate, Marizomib, Oprozomib	FALSE
EOC121	PSMB10	gain	PSMB10:NM_002801.4:exon8:c.800T>G:p.V267G	chr16:67934582A>C	nonsynonymous_SNV	NA	NA	FALSE	FALSE	FALSE	NA	FALSE	FALSE	FALSE	NA	X	Bortezomib, Ixazomib, Ixazomib Citrate, Marizomib, Oprozomib	FALSE
EOC121	PSMB4	gain	PSMB4:amp	NA	amplification	3	3-6	FALSE	FALSE	TRUE	NA	FALSE	TRUE	TRUE	NA	X	Bortezomib, Ixazomib, Ixazomib Citrate, Marizomib, Oprozomib	TRUE
EOC121	PSMC4	gain	PSMC4:amp	NA	amplification	1-2	3-10	FALSE	FALSE	TRUE	NA	FALSE	TRUE	TRUE	NA	X	Bortezomib, Ixazomib, Ixazomib Citrate, Oprozomib	TRUE
EOC121	PSMD4	gain	PSMD4:amp	NA	amplification	3	3-6	FALSE	FALSE	TRUE	NA	FALSE	TRUE	TRUE	NA	X	Bortezomib, Ixazomib, Ixazomib Citrate, Oprozomib	TRUE
EOC121	PSMD7	gain	PSMD7:ENST00000219313:e.1del	chr16:74281921_74297979del	5prime_deletion	1	1	FALSE	FALSE	FALSE	NA	FALSE	TRUE	FALSE	NA	X	Bortezomib, Ixazomib, Ixazomib Citrate, Oprozomib	FALSE
EOC121	PSMD8	gain	PSMD8:amp	NA	amplification	1-2	4-19	FALSE	FALSE	TRUE	NA	FALSE	TRUE	TRUE	NA	X	Bortezomib, Ixazomib, Ixazomib Citrate, Oprozomib	TRUE
EOC121	RAD51B	loss	RAD51B:ENST00000471583:e.9dup	chr14:68391695_68419200dup	frameshift_duplication	1	1	FALSE	FALSE	FALSE	NA	FALSE	TRUE	NA	FALSE	IIIA	Olaparib	FALSE
EOC121	TP53	loss	TP53:NM_000546.6:exon6:c.570_574del:p.P191Afs*16	chr17:7674956TGAGGA>T	frameshift_deletion	NA	NA	FALSE	TRUE	TRUE	NA	TRUE	TRUE	NA	TRUE	IVA	Adavosertib	TRUE
EOC121	XPO1	gain	XPO1:NM_003400.4:exon8:c.632T>G:p.F211C	chr2:61498872A>C	nonsynonymous_SNV	NA	NA	FALSE	FALSE	FALSE	NA	FALSE	FALSE	TRUE	NA	X	Selinexor	FALSE
EOC124	AKT2	gain	RFX2:ENST00000303657:e.2::AKT2:ENST00000392038:e.5	chr19:6045554::chr19:40247011	fusion	2-3	1-4	FALSE	FALSE	TRUE	NA	TRUE	TRUE	TRUE	NA	IVB	Capivasertib	TRUE
EOC124	ARID1A	loss	ARID1A:NM_006015.6:exon5:c.1967C>T:p.A656V	chr1:26760902C>T	nonsynonymous_SNV	NA	NA	FALSE	FALSE	FALSE	NA	FALSE	FALSE	NA	TRUE	X	Tazemetostat	FALSE
EOC124	BIRC2	gain	BIRC2:amp	NA	amplification	1-3	4-9	FALSE	FALSE	TRUE	NA	FALSE	TRUE	TRUE	NA	X	Birinapant	TRUE
EOC124	BIRC3	gain	BIRC3:amp	NA	amplification	1-3	4-9	FALSE	FALSE	FALSE	NA	FALSE	TRUE	FALSE	NA	X	Birinapant	FALSE
EOC124	CCND1	gain	CCND1:amp	NA	amplification	1-2	5-7	FALSE	FALSE	FALSE	NA	FALSE	FALSE	NA	NA	X	Palbociclib	FALSE
EOC124	EPHB2	gain	EPHB2:NM_017449.5:exon13:c.2395C>A:p.Q799K	chr1:22909064C>A	nonsynonymous_SNV	NA	NA	FALSE	FALSE	FALSE	NA	FALSE	FALSE	FALSE	NA	X	Vandetanib	FALSE
EOC124	ERBB4	gain	TMCC1:ENST00000393238:e.5::ERBB4:ENST00000342788:e.26	chr2:211412945::chr3:129656276	fusion	3	1	FALSE	FALSE	FALSE	NA	FALSE	TRUE	FALSE	NA	IVB	Afatinib, Dacomitinib, Neratinib, Poziotinib, Vandetanib	FALSE
EOC124	FLT4	gain	MEF2A:ENST00000557942:antisense::FLT4:ENST00000261937:e.11	chr5:180625515::chr15:99658361	fusion_from_unknown	3	1	FALSE	FALSE	FALSE	NA	FALSE	TRUE	FALSE	NA	IVB	Pazopanib, Regorafenib, Sorafenib, Sunitinib, Vandetanib	FALSE
EOC124	HDAC4	gain	AGAP1:ENST00000304032:antisense::HDAC4:ENST00000543185:e.6	chr2:236001429::chr2:239164428	fusion_from_unknown	3	1	FALSE	FALSE	FALSE	NA	FALSE	TRUE	FALSE	NA	X	Belinostat, CUDC-101, Entinostat, Panobinostat	FALSE
EOC124	NDUFB9	gain	NDUFB9:amp	NA	amplification	0-3	4-8	FALSE	FALSE	FALSE	NA	FALSE	TRUE	FALSE	NA	X	Metformin	FALSE
EOC124	NDUFC2	gain	NDUFC2:amp	NA	amplification	1-2	5-8	FALSE	FALSE	TRUE	NA	FALSE	TRUE	TRUE	NA	X	Metformin	TRUE
EOC124	NDUFS8	gain	NDUFS8:amp	NA	amplification	1-2	5-7	FALSE	FALSE	FALSE	NA	FALSE	FALSE	NA	NA	X	Metformin	FALSE
EOC124	NDUFV1	gain	NDUFV1:amp	NA	amplification	1-2	5-7	FALSE	FALSE	FALSE	NA	FALSE	FALSE	NA	NA	X	Metformin	FALSE
EOC124	NF1	loss	NF1:ENST00000358273:e.1_22del	chr17:31047724_31229880del	5prime_deletion	0	2	FALSE	FALSE	TRUE	NA	FALSE	TRUE	NA	TRUE	IIIA	Selumetinib	TRUE
EOC124	PDE4D	gain	PDE4D:ENST00000340635:e.2del	chr5:59199627_59243652del	inframe_deletion	0	1	FALSE	FALSE	FALSE	NA	FALSE	TRUE	FALSE	NA	X	Roflumilast	FALSE
EOC124	PSMC4	gain	PSMC4:amp	NA	amplification	1-2	2-7	FALSE	FALSE	TRUE	NA	FALSE	TRUE	TRUE	NA	X	Bortezomib, Ixazomib, Ixazomib Citrate, Oprozomib	TRUE
EOC124	PSMD8	gain	PSMD8:amp	NA	amplification	1-2	2-7	FALSE	FALSE	TRUE	NA	FALSE	TRUE	TRUE	NA	X	Bortezomib, Ixazomib, Ixazomib Citrate, Oprozomib	TRUE
EOC124	PTK2	gain	PTK2:amp	NA	amplification	0-3	4-8	FALSE	FALSE	TRUE	NA	FALSE	TRUE	TRUE	NA	X	Defactinib, GSK-2256098	TRUE
EOC124	RAD51B	loss	AK7:ENST00000267584:e.14::RAD51B:ENST00000471583:e.10	chr14:68425702::chr14:96477693	fusion	3	1	FALSE	FALSE	FALSE	NA	FALSE	TRUE	NA	FALSE	IIIA	Olaparib	FALSE
EOC124	TP53	loss	TP53:NM_000546.6:exon7:c.733G>T:p.G245C	chr17:7674230C>A	nonsynonymous_SNV	NA	NA	FALSE	FALSE	TRUE	NA	TRUE	TRUE	NA	TRUE	IVA	Adavosertib	TRUE
EOC124	TTK	gain	TTK:ENST00000369798:e.14del	chr6:80030889_80034414del	inframe_deletion	2	1	FALSE	FALSE	FALSE	NA	FALSE	TRUE	FALSE	NA	X	BAY-1161909, BAY-1217389	FALSE
EOC126	ATP4A	gain	ATP4A:ENST00000262623:antisense::ATP4A:ENST00000262623:e.19;ATP4A:ENST00000262623:antisense::ATP4A:ENST00000262623:e.2	chr19:35552003::chr19:35577142	fusion_from_unknown	2	1-2	FALSE	FALSE	FALSE	TRUE	TRUE	TRUE	FALSE	NA	X	Rabeprazole	FALSE
EOC126	FN1	gain	FN1:ENST00000354785:e.43_44del;FN1:ENST00000354785:e.43del;FN1:ENST00000354785:e.11_12del;FN1:ENST00000354785:e.10del;FN1:ENST00000354785:e.8_9del;FN1:ENST00000354785:e.39del;FN1:ENST00000438981:e.3del	chr2:215364985_215365505del;chr2:215365629_215367862del;chr2:215419385_215420673del;chr2:215420802_215422092del;chr2:215423526_215424146del;chr2:215372376_215373323del	multiple	2	NA	FALSE	FALSE	FALSE	FALSE	FALSE	TRUE	FALSE	NA	X	L19SIP 131I	FALSE
EOC126	NDUFB5	gain	NDUFB5:ENST00000259037:e.5::intergenic	chr3:179620730::chr3:180121320	truncated_transcripts	3	0	FALSE	FALSE	FALSE	TRUE	FALSE	TRUE	FALSE	NA	X	Metformin	FALSE
EOC126	NF1	loss	NF1:NM_001042492.3:exon27:c.3676_3700del:p.A1226Lfs*6	chr17:31233180GGCTCTGGCCAATGTGGTTCCTTGTT>G	frameshift_deletion	NA	NA	TRUE	TRUE	FALSE	FALSE	FALSE	TRUE	NA	TRUE	IIIA	Selumetinib	TRUE
EOC126	NF1	loss	NF1:del	NA	deletion	0	NA	FALSE	TRUE	FALSE	TRUE	FALSE	TRUE	NA	TRUE	IIIA	Selumetinib	TRUE
EOC126	NRG1	gain	intergenic::NRG1:ENST00000405005:e.2	chr8:32130317::chr8:56350715	fusion_from_unknown	1	1	FALSE	FALSE	FALSE	TRUE	FALSE	TRUE	FALSE	NA	II	Zenocutuzumab	FALSE
EOC126	PDE4D	gain	PDE4D:ENST00000502484:e.3del	chr5:59915730_60101167del	frameshift_deletion	1	1	FALSE	FALSE	FALSE	TRUE	FALSE	TRUE	FALSE	NA	X	Roflumilast	FALSE
EOC126	PTEN	loss	DCC:ENST00000442544:e.23::PTEN:ENST00000371953:e.2	chr10:87863442::chr18:53455886	fusion	2	0	FALSE	FALSE	FALSE	FALSE	FALSE	TRUE	NA	FALSE	IIIA	Capivasertib + Fulvestrant	FALSE
EOC126	RARB	gain	RARB:ENST00000330688:e.4::TOP2B:ENST00000264331:antisense	chr3:25577343::chr3:25635008	truncated_transcripts	3	0	FALSE	FALSE	FALSE	TRUE	FALSE	TRUE	FALSE	NA	X	Tretinoin	FALSE
EOC126	TP53	loss	TP53:NM_000546.6:exon6:c.646G>A:p.V216M	chr17:7674885C>T	nonsynonymous_SNV	NA	NA	TRUE	TRUE	TRUE	TRUE	TRUE	TRUE	NA	TRUE	IVA	Adavosertib	TRUE
EOC128	BCL2L1	gain	BCL2L1:amp	NA	amplification	2	32	FALSE	FALSE	FALSE	NA	TRUE	FALSE	NA	NA	X	Navitoclax	FALSE
EOC128	FGFR3	gain	FGFR3:amp	NA	amplification	2	19	FALSE	FALSE	TRUE	NA	TRUE	TRUE	TRUE	NA	IVB	Erdafitinib, Fexagratinib, Futibatinib, Pazopanib, Pemigatinib	TRUE
EOC128	FLT3	gain	NUFIP1:ENST00000379161:e.5::FLT3:ENST00000241453:e.18	chr13:28025496::chr13:44978738	fusion	3	1	FALSE	FALSE	FALSE	NA	TRUE	TRUE	FALSE	NA	IIIB	Gilteritinib, Midostaurin + High Dose Chemotherapy, Quizartinib, Sorafenib	FALSE
EOC128	GRIN2A	gain	GRIN2A:NM_001134407.3:exon7:c.1538C>A:p.T513N	chr16:9840760G>T	nonsynonymous_SNV	NA	NA	FALSE	FALSE	FALSE	NA	TRUE	TRUE	FALSE	NA	X	Memantine	FALSE
EOC128	HCK	gain	HCK:amp	NA	amplification	2	42	FALSE	FALSE	FALSE	NA	TRUE	FALSE	NA	NA	X	Bosutinib, Dasatinib, ENMD-981693, Ilorasertib	FALSE
EOC128	ROS1	gain	ROS1:NM_001378902.1:exon13:c.1535C>T:p.A512V	chr6:117389601G>A	nonsynonymous_SNV	NA	NA	FALSE	FALSE	FALSE	NA	TRUE	FALSE	FALSE	NA	X	Cabozantinib, Ceritinib, Crizotinib, Entrectinib, Lorlatinib, Repotrectinib, Taletrectinib	FALSE
EOC128	TP53	loss	TP53:NM_000546.6:exon5:c.430_431delinsTG:p.Q144W	chr17:7675181TG>CA	inframe_substitution	NA	NA	FALSE	FALSE	TRUE	NA	TRUE	TRUE	NA	TRUE	IVA	Adavosertib	TRUE
EOC130	ARID1A	loss	ARID1A:NM_006015.6:exon1:c.1124delC:p.R376Gfs*15	chr1:26697526GC>G	frameshift_deletion	NA	NA	FALSE	FALSE	FALSE	NA	TRUE	TRUE	NA	TRUE	IVA	PLX2853, Tazemetostat	TRUE
EOC130	BRAF	gain	BRAF:ENST00000646891:e.3::OR2F2:ENST00000408955:antisense	chr7:140834662::chr7:143928448	truncated_transcripts	5	2	FALSE	FALSE	TRUE	NA	FALSE	TRUE	TRUE	NA	X	Belvarafenib, Binimetinib, Cetuximab, Cobimetinib, Dabrafenib, Encorafenib, Panitumumab, Plixorafenib, Regorafenib, Selumetinib, Sorafenib, Sorafenib Tosylate, Tovorafenib, Trametinib, Vemurafenib	TRUE
EOC130	CDK12	loss	CDK12:NM_016507.4:exon9:c.2843T>A:p.I948N	chr17:39515805T>A	nonsynonymous_SNV	NA	NA	FALSE	FALSE	TRUE	NA	TRUE	TRUE	NA	TRUE	IIIA	Olaparib, Talazoparib + Enzalutamide	TRUE
EOC130	EPHA6	gain	EPHA6:ENST00000389672:e.3::intergenic	chr3:95769948::chr3:97111395	truncated_transcripts	4	1	FALSE	FALSE	FALSE	NA	FALSE	TRUE	FALSE	NA	X	Vandetanib	FALSE
EOC130	ERBB4	gain	ERBB4:ENST00000342788:e.1::NKAIN2:ENST00000368417:antisense;ERBB4:ENST00000342788:e.20::intergenic	chr2:212404290::chr6:124336872;chr2:211059937::chr2:211485820	multiple	5	1	FALSE	FALSE	FALSE	NA	FALSE	TRUE	FALSE	NA	IVB	Afatinib, Dacomitinib, Neratinib, Poziotinib, Vandetanib	FALSE
EOC130	FGFR2	gain	FGFR2:NM_000141.5:exon18:c.2302_2355del:p.E768_D785del,FGFR2:NM_022970.4:exon18:c.2305_2358del:p.E769_D786del	chr10:121479967TGTCAGGGTAACTAGGTGAATACTGTTCGAGAGGTTGGCTGAGGTCCAAGTATTCCTGAAAGAAGGGAAGAGAGACGTTTTATTTCATCTTGG>T	inframe_deletion	NA	NA	FALSE	FALSE	TRUE	NA	TRUE	TRUE	TRUE	NA	IIIB	Futibatinib, Pemigatinib	TRUE
EOC130	GRIN2A	gain	GRIN2A:ENST00000330684:e.2::TVP23A:ENST00000299866:e.3	chr16:10055345::chr16:10792339	fusion	3	1	FALSE	FALSE	FALSE	NA	FALSE	TRUE	FALSE	NA	X	Memantine	FALSE
EOC130	GRIN2B	gain	APOLD1:ENST00000356591:antisense::GRIN2B:ENST00000609686:e.4	chr12:12767488::chr12:13766678	fusion_from_unknown	7	1	FALSE	FALSE	FALSE	NA	FALSE	TRUE	FALSE	NA	X	Memantine	FALSE
EOC130	HDAC8	gain	HDAC8:ENST00000373573:e.9::intergenic	chrX:72454979::chrX:74974725	truncated_transcripts	3-4	2	FALSE	FALSE	FALSE	NA	FALSE	TRUE	FALSE	NA	X	Belinostat, CUDC-101, Entinostat, Mocetinostat, Panobinostat	FALSE
EOC130	IDO1	gain	IDO1:amp	NA	amplification	1	7-12	FALSE	FALSE	FALSE	NA	FALSE	FALSE	NA	NA	X	Linrodostat	FALSE
EOC130	KIF5B	gain	KIF5B:NM_004521.3:exon25:c.2867G>A:p.R956Q	chr10:32015554C>T	nonsynonymous_SNV	NA	NA	FALSE	FALSE	FALSE	NA	FALSE	FALSE	TRUE	NA	X	Pralsetinib, Selpercatinib	FALSE
EOC130	NDUFB9	gain	NDUFB9:amp	NA	amplification	2-4	10-11	FALSE	FALSE	FALSE	NA	TRUE	TRUE	NA	NA	X	Metformin	NA
EOC130	NDUFS5	gain	NDUFS5:amp	NA	amplification	1	8-10	FALSE	FALSE	FALSE	NA	FALSE	FALSE	NA	NA	X	Metformin	FALSE
EOC130	NDUFV1	gain	PPFIA1:ENST00000253925:e.19::NDUFV1:ENST00000322776:e.4	chr11:67609354::chr11:70358448	fusion	5	2	FALSE	FALSE	FALSE	NA	FALSE	TRUE	FALSE	NA	X	Metformin	FALSE
EOC130	PDE4C	gain	PDE4C:NM_001098818.4:exon5:c.475T>C:p.S159P	chr19:18220898A>G	nonsynonymous_SNV	NA	NA	FALSE	FALSE	FALSE	NA	TRUE	FALSE	FALSE	NA	X	Roflumilast	FALSE
EOC130	PSMB4	gain	PSMB4:amp	NA	amplification	1	12-13	FALSE	FALSE	TRUE	NA	TRUE	TRUE	TRUE	NA	X	Bortezomib, Ixazomib, Ixazomib Citrate, Marizomib, Oprozomib	TRUE
EOC130	PSMD4	gain	PSMD4:amp	NA	amplification	1	18-20	FALSE	FALSE	TRUE	NA	TRUE	TRUE	TRUE	NA	X	Bortezomib, Ixazomib, Ixazomib Citrate, Oprozomib	TRUE
EOC130	PTK2	gain	PTK2:ENST00000696786:e.5::SLC45A4:ENST00000517878:e.2	chr8:140847619::chr8:141285198	fusion	7-9	1	FALSE	FALSE	FALSE	NA	FALSE	TRUE	FALSE	NA	X	Defactinib, GSK-2256098	FALSE
EOC130	TP53	loss	TP53:NM_000546.6:exon6:c.610G>T:p.E204X	chr17:7674921C>A	stopgain	NA	NA	FALSE	FALSE	TRUE	NA	TRUE	TRUE	NA	TRUE	IVA	Adavosertib	TRUE
EOC130	XPO1	gain	RTN4:ENST00000337526:e.3::XPO1:ENST00000401558:e.21;EHBP1:ENST00000431489:antisense::XPO1:ENST00000401558:e.21;ANTXR1:ENST00000303714:e.3::XPO1:ENST00000401558:e.21;XPO1:ENST00000401558:e.20::XPO1:ENST00000401558:antisense	chr2:55003202::chr2:61484921;chr2:61485201::chr2:62835351;chr2:61485261::chr2:69067898;chr2:61484919::chr2:61485211	multiple	2-4	NA	FALSE	FALSE	FALSE	NA	TRUE	TRUE	FALSE	NA	X	Selinexor	FALSE
EOC133	BRCA2	loss	BRCA2:NM_000059.4:exon18:c.8331+2T>C:NA	NA	germline	NA	NA	NA	NA	NA	NA	NA	TRUE	NA	TRUE	IA	Niraparib, Olaparib, Olaparib + Bevacizumab, Rucaparib	TRUE
EOC133	EPHA5	gain	EPHA5:NM_001281766.3:exon9:c.1843C>G:p.H615D	chr4:65367375G>C	nonsynonymous_SNV	NA	NA	FALSE	FALSE	FALSE	NA	TRUE	TRUE	FALSE	NA	IVB	Vandetanib	FALSE
EOC133	GRIN2B	gain	GRIN2B:amp	NA	amplification	0	10-12	FALSE	FALSE	FALSE	NA	TRUE	FALSE	NA	NA	X	Memantine	FALSE
EOC133	JAK2	gain	JAK2:ENST00000381652:e.13del;JAK2:ENST00000381652:e.14_15del	chr9:5072625_5073697del;chr9:5073785_5077453del	multiple	3	1	FALSE	FALSE	FALSE	NA	FALSE	TRUE	FALSE	NA	IIIA	Fedratinib, Ruxolitinib	FALSE
EOC133	KLRC1	gain	KLRC1:amp	NA	amplification	0	12-15	FALSE	FALSE	FALSE	NA	TRUE	FALSE	NA	NA	X	Monalizumab	FALSE
EOC133	KRAS	gain	KRAS:amp	NA	amplification	0	20-24	TRUE	FALSE	TRUE	NA	TRUE	TRUE	TRUE	NA	IVB	Adagrasib, Sotorasib	TRUE
EOC133	MTOR	gain	MTOR:NM_004958.4:exon13:c.2192G>A:p.R731H	chr1:11237859C>T	nonsynonymous_SNV	NA	NA	TRUE	FALSE	TRUE	NA	TRUE	TRUE	TRUE	NA	IIIB	Everolimus	TRUE
EOC133	NRG1	gain	intergenic::NRG1:ENST00000356819:e.2	chr8:32110491::chr8:92510975	fusion_from_unknown	1-2	1	FALSE	FALSE	FALSE	NA	TRUE	TRUE	FALSE	NA	II	Zenocutuzumab	FALSE
EOC133	PIK3CA	gain	PIK3CA:.	chr3:179209590C>G	splicing	NA	NA	FALSE	FALSE	FALSE	NA	TRUE	FALSE	TRUE	NA	X	Alpelisib, Apitolisib, BGT-226, Capivasertib, Dactolisib, Fulvestrant, Gedatolisib, Inavolisib, Omipalisib, Palbociclib, PF-04691502, Pictilisib, Pilaralisib, Serabelisib, SF-1126, Sonolisib, Voxtalisib	FALSE
EOC133	TP53	loss	TP53:NM_000546.6:exon4:c.216delC:p.V73Wfs*50	chr17:7676152CG>C	frameshift_deletion	NA	NA	TRUE	FALSE	TRUE	NA	TRUE	TRUE	NA	TRUE	IVA	Adavosertib	TRUE
EOC135	ATP4A	gain	intergenic::ATP4A:ENST00000262623:e.16	chr19:28205120::chr19:35554926	fusion_from_unknown	2-3	13-15	FALSE	FALSE	FALSE	TRUE	TRUE	TRUE	FALSE	NA	X	Rabeprazole	FALSE
EOC135	CCNE1	gain	CCNE1:amp	NA	amplification	1-2	49-56	TRUE	TRUE	TRUE	TRUE	TRUE	TRUE	TRUE	NA	IVA	Lunresertib + Camonsertib	TRUE
EOC135	CD22	gain	CD22:amp	NA	amplification	1-2	15-19	TRUE	FALSE	FALSE	TRUE	TRUE	TRUE	TRUE	NA	X	Epratuzumab	TRUE
EOC135	ESR1	gain	ESR1:ENST00000206249:e.1_4dup	chr6:151655199_151952229dup	truncated_duplication	2-3	1	FALSE	FALSE	FALSE	TRUE	TRUE	TRUE	TRUE	NA	X	Elacestrant, Fulvestrant	TRUE
EOC135	GRIN3A	gain	GRIN3A:NM_133445.3:exon3:c.2296G>T:p.A766S	chr9:101670116C>A	nonsynonymous_SNV	NA	NA	FALSE	FALSE	FALSE	TRUE	FALSE	TRUE	FALSE	NA	X	Memantine	FALSE
EOC135	MKNK1	gain	MKNK1:ENST00000371945:e.7::intergenic	chr1:38818737::chr1:46570540	truncated_transcripts	3	2	FALSE	FALSE	FALSE	TRUE	FALSE	TRUE	FALSE	NA	X	Tomivosertib	FALSE
EOC135	NDUFS5	gain	NDUFS5:amp	NA	amplification	2	2-6	FALSE	FALSE	FALSE	TRUE	FALSE	FALSE	NA	NA	X	Metformin	FALSE
EOC135	PDE4D	gain	RAB3C:ENST00000282878:antisense::PDE4D:ENST00000340635:e.3	chr5:58579665::chr5:59205095	fusion_from_unknown	3	0-1	FALSE	FALSE	FALSE	TRUE	FALSE	TRUE	FALSE	NA	X	Roflumilast	FALSE
EOC135	PTEN	loss	PTEN:del	NA	deletion	0	NA	TRUE	TRUE	TRUE	TRUE	TRUE	TRUE	NA	TRUE	IIIA	Capivasertib + Fulvestrant	TRUE
EOC135	RPS6KB1	gain	SLC6A13:ENST00000343164:e.14::RPS6KB1:ENST00000225577:e.8	chr12:221133::chr17:59933314	fusion	1-2	2	FALSE	FALSE	FALSE	TRUE	FALSE	TRUE	FALSE	NA	X	LY-2584702	FALSE
EOC135	TP53	loss	TP53:NM_000546.6:exon10:c.1007delA:p.E336Gfs*9	chr17:7670701CT>C	frameshift_deletion	NA	NA	TRUE	TRUE	TRUE	TRUE	TRUE	TRUE	NA	TRUE	IVA	Adavosertib	TRUE
EOC135	TSC2	loss	TSC2:ENST00000219476:e.12::KCNJ14:ENST00000342291:antisense	chr16:2062218::chr19:48458958	truncated_transcripts	3	1	FALSE	FALSE	FALSE	TRUE	FALSE	TRUE	NA	FALSE	IIIA	Everolimus	FALSE
EOC136	GRIN3B	gain	GRIN3B:NM_138690.3:exon3:c.1327C>T:p.Q443X	chr19:1004828C>T	stopgain	NA	NA	FALSE	FALSE	FALSE	NA	TRUE	FALSE	FALSE	NA	X	Memantine	FALSE
EOC136	IMPDH1	gain	IMPDH1:NM_000883.4:exon10:c.957dupT:p.L320Sfs*20	chr7:128398530G>GA	frameshift_insertion	NA	NA	FALSE	FALSE	FALSE	NA	TRUE	FALSE	FALSE	NA	X	Mycophenolate Mofetil	FALSE
EOC136	NF1	loss	intergenic::NF1:ENST00000358273:e.36;NF1:ENST00000358273:e.35::intergenic	chr5:7313301::chr17:31264041;chr5:7313290::chr17:31264006	balanced_translocation	0	1-2	TRUE	TRUE	TRUE	NA	TRUE	TRUE	NA	TRUE	IIIA	Selumetinib	TRUE
EOC136	PDE10A	gain	PDE10A:NM_001385079.1:exon1:c.173G>T:p.R58L	chr6:165662639C>A	nonsynonymous_SNV	NA	NA	FALSE	FALSE	FALSE	NA	FALSE	FALSE	FALSE	NA	X	PBF-999	FALSE
EOC136	PSMA8	gain	PSMA8:ENST00000415576:e.1del	chr18:26106242_26142055del	5prime_deletion	0	1	FALSE	FALSE	FALSE	NA	FALSE	TRUE	FALSE	NA	X	Bortezomib, Ixazomib, Ixazomib Citrate, Marizomib, Oprozomib	FALSE
EOC136	TP53	loss	TP53:NM_000546.6:exon5:c.456delG:p.G154Afs*16	chr17:7675155GC>G	frameshift_deletion	NA	NA	TRUE	TRUE	TRUE	NA	TRUE	TRUE	NA	TRUE	IVA	Adavosertib	TRUE
EOC138	ATP4A	gain	ATP4A:amp	NA	amplification	0	16	FALSE	FALSE	FALSE	NA	TRUE	FALSE	NA	NA	X	Rabeprazole	FALSE
EOC138	CCNE1	gain	CCNE1:amp	NA	amplification	0	19	FALSE	TRUE	FALSE	NA	TRUE	TRUE	TRUE	NA	IVA	Lunresertib + Camonsertib	TRUE
EOC138	CD22	gain	CD22:amp	NA	amplification	0	19	FALSE	FALSE	FALSE	NA	TRUE	TRUE	FALSE	NA	X	Epratuzumab	FALSE
EOC138	ESR1	gain	intergenic::ESR1:ENST00000206249:e.2;ESR1:ENST00000206249:e.3::intergenic	chr6:49909272::chr6:151694840;chr6:49909268::chr6:151890019	balanced_translocation	5	1	FALSE	FALSE	FALSE	NA	TRUE	TRUE	FALSE	NA	IIIB	Elacestrant	FALSE
EOC138	NDUFA11	gain	CPNE5:ENST00000244751:e.12::NDUFA11:ENST00000308961:e.2	chr6:36758217::chr19:5902702	fusion	5	1	FALSE	FALSE	FALSE	NA	TRUE	TRUE	FALSE	NA	X	Metformin	FALSE
EOC138	NDUFV3	gain	intergenic::NDUFV3:ENST00000354250:e.3	chr21:42901589::chrX:49025968	fusion_from_unknown	5	1	FALSE	FALSE	FALSE	NA	TRUE	TRUE	FALSE	NA	X	Metformin	FALSE
EOC138	PSMD8	gain	PSMD8:amp	NA	amplification	0	16	FALSE	TRUE	FALSE	NA	TRUE	TRUE	TRUE	NA	X	Bortezomib, Ixazomib, Ixazomib Citrate, Oprozomib	TRUE
EOC138	RARG	gain	RARG:ENST00000425354:e.10::ATF7-NPFF:ENST00000591834:e.2	chr12:53211727::chr12:53621021	fusion	4	1	FALSE	TRUE	FALSE	NA	TRUE	TRUE	TRUE	NA	IVB	Tretinoin	TRUE
EOC138	TP53	loss	TP53:NM_000546.6:exon5:c.467G>C:p.R156P	chr17:7675145C>G	nonsynonymous_SNV	NA	NA	FALSE	TRUE	FALSE	NA	TRUE	TRUE	NA	TRUE	IVA	Adavosertib	TRUE
EOC148	ADRB1	gain	ADRB1:amp	NA	amplification	0-1	2-9	FALSE	FALSE	FALSE	NA	FALSE	FALSE	NA	NA	X	Carvedilol	FALSE
EOC148	ALK	gain	ALK:ENST00000389048:e.25::intergenic	chr2:29207954::chr2:172401820	truncated_transcripts	3	1	FALSE	FALSE	FALSE	NA	FALSE	TRUE	FALSE	NA	X	Alectinib, ASP-3026, Brigatinib, Ceritinib, Crizotinib, Entrectinib, Lorlatinib	FALSE
EOC148	EPHB3	gain	EPHB3:amp	NA	amplification	1	9-13	FALSE	FALSE	FALSE	NA	TRUE	FALSE	NA	NA	X	Vandetanib	FALSE
EOC148	GRIN2B	gain	GRIN2B:amp	NA	amplification	3-6	3-7	FALSE	FALSE	FALSE	NA	FALSE	FALSE	NA	NA	X	Memantine	FALSE
EOC148	GSK3B	gain	GSK3B:ENST00000264235:e.3::NEK11:ENST00000383366:antisense	chr3:119935610::chr3:131046717	truncated_transcripts	3	1	FALSE	FALSE	TRUE	NA	TRUE	TRUE	TRUE	NA	X	LY-2090314	TRUE
EOC148	HTR3C	gain	HTR3C:amp	NA	amplification	1	9-13	FALSE	FALSE	FALSE	NA	TRUE	FALSE	NA	NA	X	Ramosetron	FALSE
EOC148	HTR3D	gain	HTR3D:amp	NA	amplification	1	9-13	FALSE	FALSE	FALSE	NA	TRUE	FALSE	NA	NA	X	Ramosetron	FALSE
EOC148	HTR3E	gain	HTR3E:amp	NA	amplification	1	9-13	FALSE	FALSE	FALSE	NA	TRUE	FALSE	NA	NA	X	Ramosetron	FALSE
EOC148	KMT2A	gain	KMT2A:NM_001197104.2:exon27:c.10048_10061del:p.Q3350Pfs*4	chr11:118505939GCAAACTACCACAAC>G	frameshift_deletion	NA	NA	FALSE	FALSE	FALSE	NA	TRUE	TRUE	FALSE	NA	X	Revumenib	FALSE
EOC148	NDUFB5	gain	NDUFB5:amp	NA	amplification	1	9-12	FALSE	FALSE	FALSE	NA	TRUE	FALSE	NA	NA	X	Metformin	FALSE
EOC148	NDUFB7	gain	TECR:ENST00000215567:antisense::NDUFB7:ENST00000215565:e.2	chr19:14564035::chr19:14573141	fusion_from_unknown	4	1	FALSE	FALSE	FALSE	NA	FALSE	TRUE	FALSE	NA	X	Metformin	FALSE
EOC148	NDUFB9	gain	NDUFB9:amp	NA	amplification	5	5-8	FALSE	FALSE	TRUE	NA	TRUE	TRUE	TRUE	NA	X	Metformin	TRUE
EOC148	NPM1	loss	FGF18:ENST00000274625:e.0::NPM1:ENST00000296930:e.7	chr5:171397957::chr5:171412176	promoter_hijacking	3	1	FALSE	FALSE	FALSE	NA	FALSE	TRUE	NA	FALSE	IIIA	Revumenib	FALSE
EOC148	NTRK3	gain	ACAT1:ENST00000265838:e.9::NTRK3:ENST00000629765:e.4	chr11:108143181::chr15:88235944	fusion	4	1	FALSE	FALSE	FALSE	NA	FALSE	TRUE	FALSE	NA	IC	Entrectinib, Larotrectinib, Repotrectinib	FALSE
EOC148	PDE10A	gain	intergenic::PDE10A:ENST00000539869:e.2	chr6:165786469::chr8:134070540	fusion_from_unknown	1	3	FALSE	FALSE	FALSE	NA	FALSE	TRUE	FALSE	NA	X	PBF-999	FALSE
EOC148	PDE4D	gain	PDE4D:ENST00000502484:e.3del	chr5:59977321_59988496del	frameshift_deletion	1	1	FALSE	FALSE	FALSE	NA	FALSE	TRUE	FALSE	NA	X	Roflumilast	FALSE
EOC148	PIK3CA	gain	PIK3CA:amp	NA	amplification	1	9-12	FALSE	FALSE	FALSE	NA	TRUE	FALSE	NA	NA	X	Alpelisib, Apitolisib, BGT-226, Capivasertib, Dactolisib, Fulvestrant, Gedatolisib, Inavolisib, Omipalisib, Palbociclib, PF-04691502, Pictilisib, Pilaralisib, Serabelisib, SF-1126, Sonolisib, Voxtalisib	FALSE
EOC148	PPP2CB	gain	PPP2CB:ENST00000221138:e.1::NSD3:ENST00000317025:antisense	chr8:30811191::chr8:38297464	truncated_transcripts	1	1	FALSE	FALSE	TRUE	NA	TRUE	TRUE	TRUE	NA	X	LB-100	TRUE
EOC148	PSMD2	gain	PSMD2:amp	NA	amplification	1	9-13	FALSE	FALSE	TRUE	NA	TRUE	TRUE	TRUE	NA	X	Bortezomib, Ixazomib, Ixazomib Citrate, Oprozomib	TRUE
EOC148	PTK2	gain	PTK2:amp	NA	amplification	5	8-9	FALSE	FALSE	TRUE	NA	TRUE	TRUE	TRUE	NA	X	Defactinib, GSK-2256098	TRUE
EOC148	RAD54L	loss	RAD54L:ENST00000371975:e.1_8del	chr1:46208545_46265389del	5prime_deletion	3	1	FALSE	FALSE	FALSE	NA	FALSE	TRUE	NA	FALSE	IIIA	Olaparib	FALSE
EOC148	RARB	gain	intergenic::RARB:ENST00000330688:e.3;RARB:ENST00000330688:e.2::intergenic	chr3:25468603::chr15:92610051;chr3:25468843::chr15:92610091	balanced_translocation	0-2	2-3	FALSE	FALSE	FALSE	NA	TRUE	TRUE	FALSE	NA	IVB	Tretinoin	FALSE
EOC148	TP53	loss	TP53:NM_000546.6:exon5:c.488A>G:p.Y163C	chr17:7675124T>C	nonsynonymous_SNV	NA	NA	FALSE	FALSE	TRUE	NA	TRUE	TRUE	NA	TRUE	IVA	Adavosertib	TRUE
EOC15	ESR1	gain	ESR1:ENST00000206249:e.4del	chr6:151883305_152005427del	inframe_deletion	1	1	FALSE	FALSE	FALSE	NA	FALSE	TRUE	FALSE	NA	IIIB	Elacestrant	FALSE
EOC15	NF1	loss	NF1:NM_001042492.3:exon28_33dup:g.3123522(7)-312593(21)dup	NA	frameshift_duplication	0	NA	TRUE	TRUE	FALSE	NA	TRUE	TRUE	NA	TRUE	IIIA	Selumetinib	TRUE
EOC15	TEK	gain	TEK:NM_000459.5:exon12:c.1679A>G:p.N560S	chr9:27197369A>G	nonsynonymous_SNV	NA	NA	FALSE	FALSE	FALSE	NA	TRUE	FALSE	FALSE	NA	X	Altiratinib, CEP-11981, Foretinib, Glesatinib, Regorafenib, Vandetanib	FALSE
EOC15	TP53	loss	TP53:NM_000546.6:exon7:c.723delC:p.C242Afs*5	chr17:7674239AG>A	frameshift_deletion	NA	NA	TRUE	TRUE	FALSE	NA	TRUE	TRUE	NA	TRUE	IVA	Adavosertib	TRUE
EOC15	VEGFA	gain	VEGFA:NM_003376.6:exon1:c.172_188del:p.L59Rfs*20	chr6:43770877ACTTCTGGGCTGTTCTCG>A	frameshift_deletion	NA	NA	FALSE	FALSE	FALSE	NA	FALSE	FALSE	FALSE	NA	X	Bevacizumab	FALSE
EOC150	ALK	gain	ALK:ENST00000389048:e.4::intergenic	chr2:29387373::chr2:30357740	truncated_transcripts	3	1	FALSE	FALSE	FALSE	NA	FALSE	TRUE	FALSE	NA	X	Alectinib, ASP-3026, Brigatinib, Ceritinib, Crizotinib, Entrectinib, Lorlatinib	FALSE
EOC150	BCL2L1	gain	intergenic::BCL2L1:ENST00000307677:e.3	chr20:31573492::chr20:31689877	fusion_from_unknown	4-5	0-1	FALSE	FALSE	FALSE	NA	FALSE	TRUE	FALSE	NA	X	Navitoclax	FALSE
EOC150	ESR1	gain	ESR1:ENST00000206249:e.1::CCDC170:ENST00000239374:e.2;intergenic::ESR1:ENST00000206249:e.2	chr6:151488664::chr6:151842282;chr1:51182802::chr6:151842054	balanced_translocation	1	1	FALSE	FALSE	FALSE	NA	FALSE	TRUE	FALSE	NA	IIIB	Elacestrant	FALSE
EOC150	GRIN2D	gain	GRIN2D:amp	NA	amplification	0-1	6-8	FALSE	FALSE	FALSE	NA	FALSE	FALSE	NA	NA	X	Memantine	FALSE
EOC150	HTR3E	gain	HTR3E:ENST00000415389:e.1::intergenic	chr3:184100165::chr3:185992402	truncated_transcripts	5-6	1	FALSE	FALSE	FALSE	NA	TRUE	TRUE	FALSE	NA	X	Ramosetron	FALSE
EOC150	MAP2K2	gain	MAP2K2:ENST00000262948:e.7::KDM4B:ENST00000159111:antisense	chr19:4097732::chr19:5124432	truncated_transcripts	1	1	FALSE	FALSE	FALSE	NA	FALSE	TRUE	FALSE	NA	X	AZD-8330, Binimetinib, Cobimetinib, Mirdametinib, Pimasertib, Refametinib, Selumetinib, TAK-733, Trametinib, Trametinib Dimethyl Sulfoxide	FALSE
EOC150	MS4A1	gain	MS4A1:NM_152866.3:exon7:c.655A>G:p.T219A	chr11:60467040A>G	nonsynonymous_SNV	NA	NA	FALSE	FALSE	FALSE	NA	TRUE	FALSE	FALSE	NA	X	Obinutuzumab, Ocaratuzumab, Ofatumumab, Rituximab	FALSE
EOC150	NAE1	gain	NAE1:ENST00000290810:e.6::CES4A:ENST00000648724:antisense	chr16:66823246::chr16:66982412	truncated_transcripts	2-3	1-2	TRUE	TRUE	TRUE	NA	TRUE	TRUE	TRUE	NA	X	Pevonedistat	TRUE
EOC150	PPP5C	gain	PPP5C:amp	NA	amplification	0-1	5-8	FALSE	FALSE	FALSE	NA	FALSE	FALSE	NA	NA	X	LB-100	FALSE
EOC150	RAD51B	loss	RAD51B:ENST00000471583:e.8dup	chr14:67972456_68366212dup	frameshift_duplication	2	1	FALSE	FALSE	FALSE	NA	FALSE	TRUE	NA	FALSE	IIIA	Olaparib	FALSE
EOC150	TP53	loss	TP53:.	chr17:7675989C>G	splicing	NA	NA	TRUE	TRUE	TRUE	NA	TRUE	TRUE	NA	TRUE	IVA	Adavosertib	TRUE
EOC151	COL4A4	gain	COL4A4:NM_000092.5:exon30:c.2681G>C:p.G894A	chr2:227055980C>G	nonsynonymous_SNV	NA	NA	FALSE	FALSE	FALSE	NA	TRUE	FALSE	TRUE	NA	X	TRC-093	FALSE
EOC151	COL4A4	gain	AGAP1:ENST00000304032:e.1::COL4A4:ENST00000396625:e.29	chr2:227058145::chr2:235662992	fusion	1	1	FALSE	TRUE	FALSE	NA	FALSE	TRUE	TRUE	NA	X	TRC-093	TRUE
EOC151	CSF1R	gain	intergenic::CSF1R:ENST00000675795:e.2	chr5:149372981::chr5:150095666	fusion_from_unknown	3	0	FALSE	FALSE	FALSE	NA	FALSE	TRUE	FALSE	NA	IVB	Elzovantinib, Fexagratinib, Pazopanib, Quizartinib, Sunitinib	FALSE
EOC151	ERBB2	gain	RARA:ENST00000254066:e.1::ERBB2:ENST00000269571:e.20	chr17:39724314::chr17:40312341	fusion	2	1	FALSE	TRUE	FALSE	NA	FALSE	TRUE	TRUE	NA	IIIB	Ado-Trastuzumab Emtansine, Lapatinib + Capecitabine, Lapatinib + Letrozole, Margetuximab + Chemotherapy, Neratinib, Neratinib + Capecitabine, Trastuzumab, Trastuzumab + Chemotherapy, Trastuzumab + Pertuzumab + Chemotherapy, Trastuzumab + Tucatinib + Capecitabine, Trastuzumab Deruxtecan, Tucatinib + Trastuzumab, Pembrolizumab + Trastuzumab + Chemotherapy, Trastuzumab + Pertuzumab, Lapatinib + Tras…	TRUE
EOC151	PDE4D	gain	PDE4D:ENST00000502484:e.3del	chr5:59908294_59993464del	frameshift_deletion	1	1	FALSE	FALSE	FALSE	NA	FALSE	TRUE	FALSE	NA	X	Roflumilast	FALSE
EOC151	PSMB3	gain	LASP1:ENST00000318008:e.4::PSMB3:ENST00000619426:e.4	chr17:38756822::chr17:38910240	fusion	1-2	0-1	FALSE	TRUE	FALSE	NA	TRUE	TRUE	TRUE	NA	X	Bortezomib, Ixazomib, Ixazomib Citrate, Marizomib, Oprozomib	TRUE
EOC151	TP53	loss	TP53:NM_000546.6:exon8:c.816delG:p.R273Vfs*72	chr17:7673803GC>G	frameshift_deletion	NA	NA	FALSE	TRUE	FALSE	NA	TRUE	TRUE	NA	TRUE	IVA	Adavosertib	TRUE
EOC153	ATP4A	gain	ATP4A:amp	NA	amplification	1-2	2-10	FALSE	FALSE	FALSE	NA	FALSE	FALSE	NA	NA	X	Rabeprazole	FALSE
EOC153	CCNE1	gain	CCNE1:amp	NA	amplification	1-2	2-9	FALSE	FALSE	FALSE	NA	FALSE	TRUE	FALSE	NA	IVA	Lunresertib + Camonsertib	FALSE
EOC153	CD22	gain	CD22:amp	NA	amplification	1-2	2-10	TRUE	TRUE	TRUE	NA	FALSE	TRUE	TRUE	NA	X	Epratuzumab	TRUE
EOC153	DPP4	gain	DPP4:amp	NA	amplification	1-3	1-6	FALSE	FALSE	FALSE	NA	FALSE	FALSE	NA	NA	X	Gemigliptin	FALSE
EOC153	EPHA3	gain	EPHA3:ENST00000336596:e.2::EPHB1:ENST00000398015:e.2	chr3:89156247::chr3:134847314	fusion	4	1	FALSE	FALSE	FALSE	NA	FALSE	TRUE	FALSE	NA	IVB	Vandetanib	FALSE
EOC153	ESR1	gain	IL22RA2:ENST00000296980:e.5::ESR1:ENST00000206249:e.2	chr6:137148113::chr6:151759850	fusion	3	1	FALSE	FALSE	FALSE	NA	FALSE	TRUE	FALSE	NA	IIIB	Elacestrant	FALSE
EOC153	GPD2	gain	GPD2:amp	NA	amplification	1-3	1-6	FALSE	FALSE	FALSE	NA	FALSE	FALSE	NA	NA	X	Metformin	FALSE
EOC153	HDAC2	gain	HDAC2:ENST00000519065:e.1del	chr6:113965781_114010822del	5prime_deletion	1	1	FALSE	FALSE	FALSE	NA	FALSE	TRUE	FALSE	NA	X	Belinostat, CUDC-101, Entinostat, Mocetinostat, Panobinostat, Vorinostat	FALSE
EOC153	LYN	gain	LYN:amp	NA	amplification	1-2	1-10	FALSE	FALSE	FALSE	NA	FALSE	FALSE	NA	NA	X	Bosutinib, Dasatinib, ENMD-981693, Ilorasertib, JNJ-26483327	FALSE
EOC153	MAPK3	gain	MAPK3:NM_002746.3:exon2:c.337delG:p.E113Kfs*3	chr16:30121839TC>T	frameshift_deletion	NA	NA	FALSE	FALSE	FALSE	NA	FALSE	FALSE	FALSE	NA	X	Temuterkib	FALSE
EOC153	NDUFA13	gain	NDUFA13:amp	NA	amplification	1-2	2-9	FALSE	FALSE	FALSE	NA	FALSE	FALSE	NA	NA	X	Metformin	FALSE
EOC153	NDUFB7	gain	NDUFB7:amp	NA	amplification	1-2	2-8	FALSE	TRUE	TRUE	NA	FALSE	TRUE	TRUE	NA	X	Metformin	TRUE
EOC153	PDE10A	gain	PDE10A:ENST00000539869:e.20::GRM1:ENST00000282753:e.2	chr6:146027311::chr6:165338582	fusion	3	1	FALSE	FALSE	FALSE	NA	FALSE	TRUE	FALSE	NA	X	PBF-999	FALSE
EOC153	PDE4C	gain	PDE4C:NM_001098818.4:exon15:c.1838T>C:p.L613P	chr19:18211134A>G	nonsynonymous_SNV	NA	NA	FALSE	FALSE	FALSE	NA	FALSE	FALSE	FALSE	NA	X	Roflumilast	FALSE
EOC153	PDE4C	gain	PDE4C:amp	NA	amplification	1-2	2-9	FALSE	FALSE	FALSE	NA	FALSE	FALSE	NA	NA	X	Roflumilast	FALSE
EOC153	PIK3R2	gain	PIK3R2:amp	NA	amplification	1-2	2-9	TRUE	TRUE	TRUE	NA	FALSE	TRUE	TRUE	NA	X	Apitolisib, BGT-226, Dactolisib, Gedatolisib, Omipalisib, PF-04691502, Pictilisib, Pilaralisib, SF-1126, Sonolisib, Voxtalisib	TRUE
EOC153	PSMD14	gain	PSMD14:amp	NA	amplification	1-3	1-6	FALSE	FALSE	FALSE	NA	FALSE	FALSE	NA	NA	X	Bortezomib, Ixazomib, Ixazomib Citrate, Oprozomib	FALSE
EOC153	PSMD8	gain	PSMD8:amp	NA	amplification	1-2	2-8	FALSE	TRUE	TRUE	NA	FALSE	TRUE	TRUE	NA	X	Bortezomib, Ixazomib, Ixazomib Citrate, Oprozomib	TRUE
EOC153	TP53	loss	TP53:NM_000546.6:exon4:c.159delG:p.W53Cfs*70	chr17:7676211:CAT>A	frameshift_deletion	NA	NA	TRUE	TRUE	TRUE	NA	TRUE	TRUE	NA	TRUE	IVA	Adavosertib	TRUE
EOC154	ABL1	gain	ABL1:ENST00000318560:e.4::intergenic;BRINP1:ENST00000265922:e.0::ABL1:ENST00000318560:e.5;ABL1:ENST00000318560:e.4::FBXW2:ENST00000608872:e.8	chr9:107111525::chr9:130870317;chr9:119377414::chr9:130869731;chr9:119378315::chr9:130870222;chr9:119839915::chr9:130870170;chr9:120765701::chr9:130869729	multiple	3	NA	FALSE	FALSE	FALSE	NA	TRUE	TRUE	FALSE	NA	IIIB	Dasatinib, Imatinib, Ponatinib, Asciminib, Bosutinib, Nilotinib	FALSE
EOC154	AURKB	gain	AURKB:ENST00000585124:e.2::RPL26:ENST00000648839:e.2;ELP5:ENST00000396628:e.0::AURKB:ENST00000585124:e.3	chr17:8209559::chr17:8382645;chr17:7243632::chr17:8209798	balanced_translocation	1	0	FALSE	FALSE	FALSE	NA	TRUE	TRUE	FALSE	NA	X	AMG-900, ENMD-2076, Ilorasertib, Tozasertib	FALSE
EOC154	CCNE1	gain	CCNE1:amp	NA	amplification	3	57	FALSE	FALSE	TRUE	NA	TRUE	TRUE	TRUE	NA	IVA	Lunresertib + Camonsertib	TRUE
EOC154	CCR5	gain	CCR5:NM_001394783.1:exon2:c.194_200del:p.D66Tfs*37	chr3:46373095ACTGACAT>A	frameshift_deletion	NA	NA	FALSE	FALSE	FALSE	NA	TRUE	FALSE	FALSE	NA	X	BMS-813160	FALSE
EOC154	NF1	loss	NF1:ENST00000358273:e.1del	chr17:31089751_31109970del	5prime_deletion	0	1	FALSE	FALSE	TRUE	NA	TRUE	TRUE	NA	TRUE	IIIA	Selumetinib	TRUE
EOC154	PSMB4	gain	PSMB4:amp	NA	amplification	7	9	FALSE	FALSE	TRUE	NA	TRUE	TRUE	TRUE	NA	X	Bortezomib, Ixazomib, Ixazomib Citrate, Marizomib, Oprozomib	TRUE
EOC154	PSMD4	gain	PSMD4:amp	NA	amplification	7	9	FALSE	FALSE	TRUE	NA	TRUE	TRUE	TRUE	NA	X	Bortezomib, Ixazomib, Ixazomib Citrate, Oprozomib	TRUE
EOC154	TP53	loss	TP53:NM_000546.6:exon7:c.752T>A:p.I251N	chr17:7674211A>T	nonsynonymous_SNV	NA	NA	FALSE	FALSE	TRUE	NA	TRUE	TRUE	NA	TRUE	IVA	Adavosertib	TRUE
EOC156	ADRM1	gain	ADRM1:amp	NA	amplification	1	9	FALSE	FALSE	FALSE	NA	TRUE	FALSE	NA	NA	X	Bortezomib, Ixazomib, Ixazomib Citrate, Oprozomib	FALSE
EOC156	AKT3	gain	AKT3:NM_005465.7:exon3:c.103T>C:p.F35L	chr1:243695660A>G	nonsynonymous_SNV	NA	NA	FALSE	FALSE	TRUE	NA	TRUE	TRUE	TRUE	NA	IVB	Capivasertib	TRUE
EOC156	CCNE1	gain	CCNE1:amp	NA	amplification	1	55	FALSE	FALSE	TRUE	NA	TRUE	TRUE	TRUE	NA	IVA	Lunresertib + Camonsertib	TRUE
EOC156	CCNE1	gain	CCNE1:NM_001238.4:exon3:c.80G>C:p.R27P	chr19:29812745G>C	nonsynonymous_SNV	NA	NA	FALSE	FALSE	TRUE	NA	TRUE	TRUE	TRUE	NA	X	Lunresertib	TRUE
EOC156	DDR2	gain	intergenic::DDR2:ENST00000367921:e.4	chr1:162730089::chr7:57558923	fusion_from_unknown	3	0	FALSE	FALSE	FALSE	NA	TRUE	TRUE	FALSE	NA	IVB	Regorafenib	FALSE
EOC156	EPHA2	gain	EPHA2:ENST00000358432:e.1_3dup	chr1:16147244_16181479dup	truncated_duplication	2	1	FALSE	FALSE	FALSE	NA	TRUE	TRUE	FALSE	NA	X	Dasatinib, Regorafenib, Vandetanib	FALSE
EOC156	EPHB1	gain	EPHB1:NM_004441.5:exon3:c.204G>C:p.Q68H	chr3:134951451G>C	nonsynonymous_SNV	NA	NA	FALSE	FALSE	TRUE	NA	TRUE	TRUE	TRUE	NA	IVB	Vandetanib	TRUE
EOC156	FGFR2	gain	FGFR2:amp	NA	amplification	1	7	FALSE	FALSE	FALSE	NA	TRUE	TRUE	FALSE	NA	IVB	Erdafitinib, Fexagratinib, Futibatinib, Lirafugratinib, Pemigatinib, Regorafenib	FALSE
EOC156	GRIN2B	gain	GRIN2B:amp	NA	amplification	4	6	FALSE	FALSE	FALSE	NA	TRUE	FALSE	NA	NA	X	Memantine	FALSE
EOC156	HCK	gain	intergenic::HCK:ENST00000375852:e.2	chr20:32051332::chr20:58829973	fusion_from_unknown	6	0	FALSE	FALSE	FALSE	NA	TRUE	TRUE	FALSE	NA	IVB	Bosutinib, Dasatinib	FALSE
EOC156	KLRC1	gain	KLRC1:amp	NA	amplification	4	6	FALSE	FALSE	FALSE	NA	TRUE	FALSE	NA	NA	X	Monalizumab	FALSE
EOC156	KRAS	gain	KRAS:NM_004985.5:exon2:c.35G>T:p.G12V,KRAS:NM_033360.4:exon2:c.35G>T:p.G12V	chr12:25245350C>A	nonsynonymous_SNV	NA	NA	FALSE	FALSE	TRUE	NA	TRUE	TRUE	TRUE	NA	IIIA	Cobimetinib, Trametinib	TRUE
EOC156	KRAS	gain	KRAS:ENST00000311936:e.2::intergenic;KRAS:ENST00000311936:e.2::ITPR2:ENST00000381340:e.38;intergenic::KRAS:ENST00000311936:e.3	chr12:25232313::chr12:27231551;chr12:25232060::chr12:26502103;chr12:25232301::chr12:27232073	multiple	9	NA	FALSE	FALSE	FALSE	NA	TRUE	TRUE	FALSE	NA	IIIB	Adagrasib + Cetuximab, Adagrasib, Sotorasib, Adagrasib + Panitumumab, Sotorasib + Cetuximab, Sotorasib + Panitumumab, Cobimetinib, Trametinib, Cetuximab, Cetuximab + Chemotherapy, Panitumumab, Panitumumab + Chemotherapy	FALSE
EOC156	KRAS	gain	KRAS:amp	NA	amplification	4	6	FALSE	FALSE	TRUE	NA	TRUE	TRUE	TRUE	NA	IVB	Adagrasib, Sotorasib	TRUE
EOC156	NDUFA9	gain	NDUFA9:amp	NA	amplification	4	6	FALSE	FALSE	TRUE	NA	TRUE	TRUE	TRUE	NA	X	Metformin	TRUE
EOC156	NF1	loss	intergenic::NF1:ENST00000358273:e.9	chr1:192079154::chr17:31195286	fusion_from_unknown	3	1	FALSE	FALSE	FALSE	NA	TRUE	TRUE	NA	FALSE	IIIA	Selumetinib	FALSE
EOC156	NOTCH1	gain	NOTCH1:ENST00000651671:e.13::intergenic	chr9:136514480::chr9:136929463	truncated_transcripts	3	2	FALSE	FALSE	FALSE	NA	TRUE	TRUE	FALSE	NA	X	Brontictuzumab	FALSE
EOC156	PPP2CB	gain	PPP2CB:ENST00000221138:e.1::intergenic	chr8:30808942::chr8:31250324	truncated_transcripts	4	1	FALSE	FALSE	FALSE	NA	TRUE	TRUE	FALSE	NA	X	LB-100	FALSE
EOC156	PSMA7	gain	PSMA7:amp	NA	amplification	1	9	FALSE	FALSE	FALSE	NA	TRUE	FALSE	NA	NA	X	Bortezomib, Ixazomib, Ixazomib Citrate, Marizomib, Oprozomib	FALSE
EOC156	PSMB8	gain	PSMB8:NM_148919.4:exon5:c.653A>G:p.N218S	chr6:32841620T>C	nonsynonymous_SNV	NA	NA	FALSE	FALSE	FALSE	NA	TRUE	FALSE	TRUE	NA	X	Bortezomib, Ixazomib, Ixazomib Citrate, Marizomib, Oprozomib	FALSE
EOC156	PSMD2	gain	intergenic::PSMD2:ENST00000310118:e.2	chr3:184297277::chr3:184430229	fusion_from_unknown	5	1	FALSE	FALSE	FALSE	NA	TRUE	TRUE	FALSE	NA	X	Bortezomib, Ixazomib, Ixazomib Citrate, Oprozomib	FALSE
EOC156	PTK6	gain	PTK6:amp	NA	amplification	1	12	FALSE	FALSE	FALSE	NA	TRUE	FALSE	NA	NA	X	Vandetanib	FALSE
EOC156	SRMS	gain	SRMS:amp	NA	amplification	1	12	FALSE	FALSE	FALSE	NA	TRUE	FALSE	NA	NA	X	Dasatinib, ENMD-981693, Ilorasertib	FALSE
EOC156	TP53	loss	TP53:NM_000546.6:exon8:c.820_821del:p.V274Lfs*31	chr17:7673798AAC>A	frameshift_deletion	NA	NA	FALSE	FALSE	TRUE	NA	TRUE	TRUE	NA	TRUE	IVA	Adavosertib	TRUE
EOC160	BCL2L1	gain	BCL2L1:amp	NA	amplification	2	10-11	FALSE	FALSE	FALSE	TRUE	TRUE	FALSE	NA	NA	X	Navitoclax	FALSE
EOC160	BRIP1	loss	BRIP1:NM_032043.3:exon11:c.1586G>T:p.G529V	chr17:61784312C>A	nonsynonymous_SNV	NA	NA	FALSE	FALSE	FALSE	TRUE	TRUE	TRUE	NA	FALSE	IIIA	Olaparib	FALSE
EOC160	CCNE1	gain	CCNE1:amp	NA	amplification	1	10-11	TRUE	FALSE	TRUE	TRUE	TRUE	TRUE	TRUE	NA	IVA	Lunresertib + Camonsertib	TRUE
EOC160	ERBB4	gain	intergenic::ERBB4:ENST00000342788:e.26	chr2:211195961::chr2:211405927	fusion_from_unknown	2	1	FALSE	FALSE	FALSE	TRUE	FALSE	TRUE	FALSE	NA	IVB	Afatinib, Dacomitinib, Neratinib, Poziotinib, Vandetanib	FALSE
EOC160	FN1	gain	FN1:ENST00000354785:e.4del;FN1:ENST00000354785:e.3_4del	chr2:215430854_215431841del;chr2:215431962_215433329del	multiple	2	1	FALSE	FALSE	FALSE	FALSE	FALSE	TRUE	FALSE	NA	X	L19SIP 131I	FALSE
EOC160	HCK	gain	HCK:amp	NA	amplification	2	10-11	FALSE	FALSE	FALSE	TRUE	TRUE	FALSE	NA	NA	X	Bosutinib, Dasatinib, ENMD-981693, Ilorasertib	FALSE
EOC160	MTOR	gain	NMNAT1:ENST00000377205:antisense::MTOR:ENST00000361445:e.24	chr1:9955757::chr1:11211270	fusion_from_unknown	3	0	FALSE	FALSE	FALSE	FALSE	FALSE	TRUE	FALSE	NA	IIIB	Everolimus	FALSE
EOC160	NF1	loss	NF1:ENST00000358273:e.36::intergenic	chr2:193618036::chr17:31284192	truncated_transcripts	1	0-1	FALSE	FALSE	FALSE	TRUE	TRUE	TRUE	NA	FALSE	IIIA	Selumetinib	FALSE
EOC160	NRG1	gain	intergenic::NRG1:ENST00000356819:e.2	chr8:8776908::chr8:32287971	fusion_from_unknown	1	2	FALSE	FALSE	FALSE	TRUE	TRUE	TRUE	FALSE	NA	II	Zenocutuzumab	FALSE
EOC160	RPS6KB1	gain	RPS6KB1:amp	NA	amplification	0	7-8	FALSE	FALSE	FALSE	FALSE	FALSE	FALSE	NA	NA	X	LY-2584702	FALSE
EOC160	TP53	loss	TP53:NM_000546.6:exon5:c.527G>A:p.C176Y	chr17:7675085C>T	nonsynonymous_SNV	NA	NA	TRUE	FALSE	TRUE	TRUE	TRUE	TRUE	NA	TRUE	IVA	Adavosertib	TRUE
EOC164	BCL2L2-PABPN1	gain	IFNLR1:ENST00000327535:e.3::BCL2L2-PABPN1:ENST00000678502:e.4	chr1:24163529::chr14:23315197	fusion	6	1	FALSE	FALSE	FALSE	NA	FALSE	TRUE	FALSE	NA	X	Navitoclax	FALSE
EOC164	BCR	gain	MYO18B:ENST00000335473:e.18::BCR:ENST00000305877:e.2	chr22:23204951::chr22:25844246	fusion	5	1	FALSE	FALSE	FALSE	NA	FALSE	TRUE	FALSE	NA	IVB	Asciminib, Bosutinib, Dasatinib, Imatinib, Nilotinib, Ponatinib	FALSE
EOC164	CCNE1	gain	CCNE1:amp	NA	amplification	2-4	10-22	FALSE	FALSE	TRUE	NA	TRUE	TRUE	TRUE	NA	IVA	Lunresertib + Camonsertib	TRUE
EOC164	CD274	gain	CD274:amp	NA	amplification	0-1	3-38	FALSE	TRUE	FALSE	NA	FALSE	TRUE	TRUE	NA	X	Atezolizumab, Avelumab, Danburstotug, Durvalumab, Envafolimab, Sugemalimab	TRUE
EOC164	CXCL8	gain	CXCL8:amp	NA	amplification	1-2	2-63	FALSE	FALSE	FALSE	NA	FALSE	FALSE	NA	NA	X	Adakitug	FALSE
EOC164	EZH2	gain	EZH2:ENST00000320356:e.1del	chr7:148875407_148943241del	5prime_deletion	2	1	FALSE	FALSE	FALSE	NA	FALSE	TRUE	FALSE	NA	X	Tazemetostat	FALSE
EOC164	HDAC1	gain	HDAC1:ENST00000373548:e.10dup	chr1:32331550_32331620dup	inframe_duplication	3	1	FALSE	FALSE	FALSE	NA	FALSE	TRUE	FALSE	NA	X	Belinostat, CUDC-101, Entinostat, Mocetinostat, Panobinostat, Vorinostat	FALSE
EOC164	HDAC6	gain	HDAC6:amp	NA	amplification	0-1	2-10	TRUE	TRUE	FALSE	NA	FALSE	TRUE	TRUE	NA	X	Belinostat, CUDC-101, Entinostat, Panobinostat, Vorinostat	TRUE
EOC164	HSP90AB1	gain	HSP90AB1:amp	NA	amplification	1-4	4-8	TRUE	TRUE	FALSE	NA	FALSE	TRUE	TRUE	NA	X	Retaspimycin, Retaspimycin Hydrochloride, SNX 5422, Tanespimycin	TRUE
EOC164	JAK2	gain	JAK2:amp	NA	amplification	0-1	3-38	FALSE	FALSE	FALSE	NA	FALSE	FALSE	NA	NA	X	AZD-1480, BMS-911543, Fedratinib, Ruxolitinib	FALSE
EOC164	JAK2	gain	JAK2:ENST00000381652:e.9::CD274:ENST00000381577:antisense	chr9:5066624::chr9:5468244	truncated_transcripts	22	12	FALSE	TRUE	FALSE	NA	FALSE	TRUE	TRUE	NA	X	AZD-1480, BMS-911543, Fedratinib, Ruxolitinib	TRUE
EOC164	KIF11	gain	KIF11:ENST00000260731:e.1::intergenic	chr10:92606025::chr10:92792490	truncated_transcripts	2	1	FALSE	FALSE	FALSE	NA	FALSE	TRUE	FALSE	NA	X	Ispinesib, Litronesib	FALSE
EOC164	KIF5B	gain	KIF5B:amp	NA	amplification	1-2	7-13	FALSE	FALSE	FALSE	NA	FALSE	FALSE	NA	NA	X	Pralsetinib, Selpercatinib	FALSE
EOC164	MAPK1	gain	MAPK1:amp	NA	amplification	1-2	5-30	FALSE	FALSE	FALSE	NA	FALSE	FALSE	NA	NA	X	Temuterkib	FALSE
EOC164	MAPK3	gain	MAPK3:NM_002746.3:exon2:c.322C>T:p.R108W	chr16:30121855G>A	nonsynonymous_SNV	NA	NA	FALSE	FALSE	TRUE	NA	FALSE	TRUE	TRUE	NA	X	Temuterkib	TRUE
EOC164	NDUFAF2	gain	DEPDC1B:ENST00000265036:antisense::NDUFAF2:ENST00000296597:e.4	chr5:60674850::chr5:61130546	fusion_from_unknown	2	1	FALSE	FALSE	FALSE	NA	FALSE	TRUE	FALSE	NA	X	Metformin	FALSE
EOC164	NDUFC2	gain	NDUFC2:amp	NA	amplification	2	2-21	FALSE	FALSE	TRUE	NA	FALSE	TRUE	TRUE	NA	X	Metformin	TRUE
EOC164	NRP1	gain	NRP1:NM_003873.7:exon14:c.2221C>T:p.R741C	chr10:33186330G>A	nonsynonymous_SNV	NA	NA	FALSE	FALSE	FALSE	NA	FALSE	FALSE	TRUE	NA	X	Vesencumab	FALSE
EOC164	NRP1	gain	NRP1:amp	NA	amplification	1-2	6-13	FALSE	FALSE	FALSE	NA	FALSE	FALSE	NA	NA	X	Vesencumab	FALSE
EOC164	PIM2	gain	PIM2:amp	NA	amplification	0-1	2-10	FALSE	FALSE	FALSE	NA	FALSE	FALSE	NA	NA	X	AZD-1208	FALSE
EOC164	PLK4	gain	INTU:ENST00000335251:antisense::PLK4:ENST00000270861:e.15;PLK4:ENST00000270861:e.1_14del;PLK4:ENST00000270861:e.14::INTU:ENST00000335251:antisense	chr4:127684621::chr4:127896667;chr4:127867418_127896512del;chr4:127685987::chr4:127896673	multiple	3	NA	FALSE	FALSE	FALSE	NA	FALSE	TRUE	FALSE	NA	X	CFI-400945, Ocifisertib	FALSE
EOC164	PSMA8	gain	PSMA8:amp	NA	amplification	1	2-16	FALSE	FALSE	FALSE	NA	FALSE	FALSE	NA	NA	X	Bortezomib, Ixazomib, Ixazomib Citrate, Marizomib, Oprozomib	FALSE
EOC164	RAD51B	loss	RAD51B:ENST00000471583:e.9::intergenic	chr14:68420692::chr14:83616991	truncated_transcripts	2	1	FALSE	FALSE	FALSE	NA	FALSE	TRUE	NA	FALSE	IIIA	Olaparib	FALSE
EOC164	RAD54L	loss	RAD54L:ENST00000371975:e.16::PFAS:ENST00000314666:e.6;RAD54L:ENST00000371975:e.16::PFAS:ENST00000625942:e.4	chr1:46276860::chr17:8255803	fusion	3	1	FALSE	FALSE	FALSE	NA	FALSE	TRUE	NA	FALSE	IIIA	Olaparib	FALSE
EOC164	RBX1	gain	RBX1:amp	NA	amplification	1	1-51	FALSE	FALSE	FALSE	NA	FALSE	FALSE	NA	NA	X	Lenalidomide, Thalidomide	FALSE
EOC164	TEK	gain	TEK:amp	NA	amplification	0-1	3-26	FALSE	FALSE	FALSE	NA	FALSE	FALSE	NA	NA	X	Altiratinib, CEP-11981, Foretinib, Glesatinib, Regorafenib, Vandetanib	FALSE
EOC164	TEK	gain	TEK:ENST00000380036:e.1del	chr9:27060326_27145553del	5prime_deletion	6	1	FALSE	FALSE	FALSE	NA	FALSE	TRUE	FALSE	NA	X	Altiratinib, CEP-11981, Foretinib, Glesatinib, Regorafenib, Vandetanib	FALSE
EOC164	TP53	loss	TP53:NM_000546.6:exon6:c.659A>G:p.Y220C	chr17:7674872T>C	nonsynonymous_SNV	NA	NA	TRUE	TRUE	TRUE	NA	TRUE	TRUE	NA	TRUE	IVA	Rezatapopt	TRUE
EOC164	VEGFA	gain	VEGFA:amp	NA	amplification	1-4	4-9	FALSE	FALSE	FALSE	NA	FALSE	FALSE	NA	NA	X	Bevacizumab	FALSE
EOC164	XPO1	gain	XPO1:ENST00000401558:e.4::USP34:ENST00000398571:e.11	chr2:61364037::chr2:61505460	fusion	3	1	FALSE	TRUE	FALSE	NA	FALSE	TRUE	TRUE	NA	X	Selinexor	TRUE
EOC165	AR	gain	AR:ENST00000374690:e.2_8del	chrX:67555056_67729632del	inframe_deletion	1	1	FALSE	FALSE	FALSE	NA	TRUE	TRUE	FALSE	NA	X	Abiraterone, Apalutamide, Darolutamide, Enzalutamide	FALSE
EOC165	CCNE1	gain	CCNE1:amp	NA	amplification	3	22	FALSE	FALSE	TRUE	NA	TRUE	TRUE	TRUE	NA	IVA	Lunresertib + Camonsertib	TRUE
EOC165	KIF5B	gain	KIF5B:ENST00000302418:e.2::ARHGAP12:ENST00000344936:e.2	chr10:31913486::chr10:32044747	fusion	4	2	FALSE	FALSE	TRUE	NA	TRUE	TRUE	TRUE	NA	IVB	Pralsetinib, Selpercatinib	TRUE
EOC165	PIK3CG	gain	PIK3CG:NM_001282426.2:exon2:c.1152G>T:p.E384D	chr7:106868713G>T	nonsynonymous_SNV	NA	NA	FALSE	FALSE	FALSE	NA	TRUE	FALSE	FALSE	NA	X	Apitolisib, BGT-226, Dactolisib, Duvelisib, Gedatolisib, Omipalisib, PF-04691502, Pictilisib, Pilaralisib, SF-1126, Sonolisib, Voxtalisib	FALSE
EOC165	PSMB4	gain	PSMB4:amp	NA	amplification	2	10	FALSE	FALSE	FALSE	NA	TRUE	TRUE	FALSE	NA	X	Bortezomib, Ixazomib, Ixazomib Citrate, Marizomib, Oprozomib	FALSE
EOC165	PSMD4	gain	PSMD4:amp	NA	amplification	2	10	FALSE	FALSE	TRUE	NA	TRUE	TRUE	TRUE	NA	X	Bortezomib, Ixazomib, Ixazomib Citrate, Oprozomib	TRUE
EOC165	RAD51B	loss	PRKCE:ENST00000306156:e.1::RAD51B:ENST00000471583:e.8	chr2:45747724::chr14:68131435	fusion	2	2	FALSE	FALSE	FALSE	NA	TRUE	TRUE	NA	FALSE	IIIA	Olaparib	FALSE
EOC165	RET	gain	RET:NM_020975.6:exon16:c.2789C>T:p.T930M	chr10:43122004C>T	nonsynonymous_SNV	NA	NA	FALSE	FALSE	FALSE	NA	TRUE	TRUE	FALSE	NA	IIIA	Selpercatinib, Pralsetinib	FALSE
EOC165	TP53	loss	TP53:NM_000546.6:exon5:c.434T>A:p.L145Q	chr17:7675178A>T	nonsynonymous_SNV	NA	NA	FALSE	FALSE	TRUE	NA	TRUE	TRUE	NA	TRUE	IVA	Adavosertib	TRUE
EOC165	TSC2	loss	CACNG3:ENST00000005284:antisense::TSC2:ENST00000219476:e.39	chr16:2087859::chr16:24328335	fusion_from_unknown	3	4	FALSE	FALSE	FALSE	NA	TRUE	TRUE	NA	FALSE	IIIA	Everolimus	FALSE
EOC167	ATM	loss	ATM:NM_000051.4:exon55:c.8030A>G:p.Y2677C	chr11:108334988A>G	nonsynonymous_SNV	NA	NA	FALSE	FALSE	FALSE	TRUE	FALSE	TRUE	NA	FALSE	IIIA	Olaparib, Talazoparib + Enzalutamide	FALSE
EOC167	EPCAM	gain	MSH2:ENST00000233146:e.8::EPCAM:ENST00000263735:e.2	chr2:47339507::chr2:47452154	fusion	2	1	FALSE	FALSE	FALSE	TRUE	TRUE	TRUE	FALSE	NA	X	Catumaxomab, Edrecolomab	FALSE
EOC167	ERBB2	gain	ERBB2:ENST00000269571:e.16::KRT32:ENST00000225899:antisense	chr17:39722205::chr17:41462648	truncated_transcripts	2	1	FALSE	FALSE	FALSE	TRUE	FALSE	TRUE	FALSE	NA	X	AC-480, AEE-788, Afatinib, BMS-690514, CUDC-101, Dacomitinib, Dacomitinib Anhydrous, JNJ-26483327, Lapatinib, MP-412, Neratinib, Pertuzumab, Poziotinib, Sapitinib, TAK-285, Tesevatinib, Trastuzumab, Tucatinib, Vandetanib, Varlitinib, Zanidatamab, Zenocutuzumab	FALSE
EOC167	GRIN1	gain	GRIN1:ENST00000371561:e.3::CCDC183:ENST00000338005:e.6	chr9:136800848::chr9:137148732	fusion	2-3	1	FALSE	FALSE	FALSE	TRUE	TRUE	TRUE	FALSE	NA	X	Memantine	FALSE
EOC167	MAPK11	gain	SBF1:ENST00000380817:e.24::MAPK11:ENST00000330651:e.2	chr22:50269061::chr22:50460525	fusion	0	2	FALSE	TRUE	TRUE	TRUE	TRUE	TRUE	TRUE	NA	IVB	Regorafenib	TRUE
EOC167	NDUFAF2	gain	DEPDC1B:ENST00000265036:antisense::NDUFAF2:ENST00000296597:e.2	chr5:60647916::chr5:60973960	fusion_from_unknown	4	1	FALSE	FALSE	FALSE	FALSE	FALSE	TRUE	FALSE	NA	X	Metformin	FALSE
EOC167	PPP2R1A	loss	PPP2R1A:ENST00000322088:e.1del	chr19:52190173_52201943del	inframe_deletion	1	0	FALSE	FALSE	FALSE	FALSE	FALSE	TRUE	NA	FALSE	IVA	Lunresertib + Camonsertib	FALSE
EOC167	PTK2	gain	PTK2:amp	NA	amplification	2-3	3-5	FALSE	TRUE	FALSE	FALSE	FALSE	TRUE	TRUE	NA	X	Defactinib, GSK-2256098	TRUE
EOC167	RPS6KB1	gain	RPS6KB1:ENST00000225577:e.1::PTRH2:ENST00000393038:antisense	chr17:59700527::chr17:59908129	truncated_transcripts	3	1	FALSE	FALSE	FALSE	TRUE	FALSE	TRUE	TRUE	NA	X	LY-2584702	TRUE
EOC167	TIGIT	gain	TIGIT:ENST00000383671:e.3::intergenic	chr3:114303554::chr12:63751183	truncated_transcripts	4	0	FALSE	FALSE	FALSE	FALSE	FALSE	TRUE	FALSE	NA	X	Domvanalimab, Ociperlimab, Tiragolumab	FALSE
EOC167	TP53	loss	TP53:NM_000546.6:exon5:c.559+1G>A	chr17:7675052C>T	splicing	NA	NA	FALSE	TRUE	TRUE	TRUE	TRUE	TRUE	NA	TRUE	IVA	Adavosertib	TRUE
EOC172	BCR	gain	BCR:ENST00000305877:e.1::ZNF772:ENST00000356584:antisense;ZNF419:ENST00000221735:e.0::BCR:ENST00000305877:e.2	chr19:57473690::chr22:23229488;chr19:57478828::chr22:23220232	multiple	0-2	0-2	FALSE	FALSE	FALSE	NA	TRUE	TRUE	FALSE	NA	IVB	Asciminib, Bosutinib, Dasatinib, Imatinib, Nilotinib, Ponatinib	FALSE
EOC172	CDK6	gain	CDK6:ENST00000424848:e.2::intergenic;EML6:ENST00000356458:e.28::CDK6:ENST00000424848:e.3	chr2:19054429::chr7:92799368;chr2:54932724::chr7:92799516	balanced_translocation	1	1	FALSE	FALSE	FALSE	NA	TRUE	TRUE	FALSE	NA	IVB	Abemaciclib, Palbociclib, Ribociclib	FALSE
EOC172	EGFR	gain	EGFR:NM_005228.5:exon27:c.3232A>G:p.T1078A	chr7:55202586A>G	nonsynonymous_SNV	NA	NA	FALSE	FALSE	FALSE	NA	TRUE	FALSE	TRUE	NA	X	AC-480, AEE-788, Afatinib, Amivantamab, Aumolertinib, BMS-690514, Brigatinib, Cetuximab, CLN-081, CUDC-101, Dacomitinib, Dacomitinib Anhydrous, Erlotinib, Erlotinib Hydrochloride, Gefitinib, JNJ-26483327, Lapatinib, Lazertinib, MP-412, Neratinib, Nimotuzumab, Osimertinib, Panitumumab, Poziotinib, Sapitinib, TAK-285, Tesevatinib, Theliatinib, Vandetanib, Varlitinib	FALSE
EOC172	F10	gain	F10:ENST00000375559:e.2::intergenic	chr13:113135182::chr16:59165723	truncated_transcripts	1	1	FALSE	FALSE	FALSE	NA	FALSE	FALSE	FALSE	NA	X	Apixaban, Rivaroxaban	FALSE
EOC172	PRKCB	gain	PRKCB:ENST00000643927:e.2::intergenic	chr16:23856875::chrX:42401908	truncated_transcripts	1	1	FALSE	FALSE	FALSE	NA	FALSE	FALSE	FALSE	NA	X	Enzastaurin	FALSE
EOC172	PSMC6	gain	AKAP6:ENST00000280979:antisense::PSMC6:ENST00000445930:e.2	chr14:32423160::chr14:52699497	fusion_from_unknown	0	1	FALSE	FALSE	FALSE	NA	FALSE	TRUE	FALSE	NA	X	Bortezomib, Ixazomib, Ixazomib Citrate, Oprozomib	FALSE
EOC172	TP53	loss	TP53:NM_000546.6:exon10:c.1001G>T:p.G334V	chr17:7670708C>A	nonsynonymous_SNV	NA	NA	TRUE	TRUE	TRUE	NA	TRUE	TRUE	NA	TRUE	IVA	Adavosertib	TRUE
EOC175	BCL2L1	gain	BCL2L1:amp	NA	amplification	2-3	6	FALSE	FALSE	FALSE	NA	FALSE	FALSE	NA	NA	X	Navitoclax	FALSE
EOC175	BIRC2	gain	BIRC2:amp	NA	amplification	4	9-11	TRUE	TRUE	FALSE	NA	TRUE	TRUE	TRUE	NA	X	Birinapant	TRUE
EOC175	BIRC2	gain	BIRC2:ENST00000227758:e.3::BIRC2:ENST00000227758:antisense	chr11:102349579::chr11:102355778	truncated_transcripts	11-13	3-6	FALSE	FALSE	FALSE	NA	TRUE	TRUE	FALSE	NA	X	Birinapant	FALSE
EOC175	BIRC3	gain	BIRC3:amp	NA	amplification	5-9	9-15	FALSE	TRUE	FALSE	NA	TRUE	TRUE	TRUE	NA	X	Birinapant	TRUE
EOC175	CCDC6	gain	CCDC6:ENST00000263102:e.1::ANK3:ENST00000280772:e.40	chr10:59884286::chr10:60063247	fusion	3	2	TRUE	TRUE	FALSE	NA	TRUE	TRUE	TRUE	NA	IVB	Pralsetinib, Selpercatinib	TRUE
EOC175	CD22	gain	CD22:ENST00000085219:e.9::intergenic	chr19:35085627::chr19:35343842	truncated_transcripts	4	0	FALSE	FALSE	FALSE	NA	FALSE	TRUE	FALSE	NA	X	Epratuzumab	FALSE
EOC175	CD274	gain	CD274:amp	NA	amplification	0	9-11	FALSE	TRUE	FALSE	NA	TRUE	TRUE	TRUE	NA	X	Atezolizumab, Avelumab, Danburstotug, Durvalumab, Envafolimab, Sugemalimab	TRUE
EOC175	CD274	gain	CD274:ENST00000381577:e.6::intergenic	chr9:5467387::chr9:125393258	truncated_transcripts	2	7-8	TRUE	TRUE	FALSE	NA	TRUE	TRUE	TRUE	NA	X	Atezolizumab, Avelumab, Danburstotug, Durvalumab, Envafolimab, Sugemalimab	TRUE
EOC175	ENG	gain	ENG:amp	NA	amplification	0	12-13	FALSE	FALSE	FALSE	NA	TRUE	FALSE	NA	NA	X	Carotuximab	FALSE
EOC175	ERBB4	gain	ERBB4:ENST00000342788:e.13_22del	chr2:211426393_211692214del	inframe_deletion	3	0	FALSE	FALSE	FALSE	NA	FALSE	TRUE	FALSE	NA	IVB	Afatinib, Dacomitinib, Neratinib, Poziotinib, Vandetanib	FALSE
EOC175	EZH2	gain	EZH2:ENST00000320356:e.2_3del	chr7:148840445_148872839del	inframe_deletion	3-4	1	FALSE	FALSE	FALSE	NA	TRUE	TRUE	FALSE	NA	IIIA	Tazemetostat	FALSE
EOC175	FGFR2	gain	FGFR2:NM_000141.5:exon7:c.892G>T:p.G298C,FGFR2:NM_022970.4:exon7:c.892G>T:p.G298C	chr10:121520026C>A	nonsynonymous_SNV	NA	NA	TRUE	TRUE	FALSE	NA	TRUE	TRUE	TRUE	NA	IIIB	Futibatinib, Pemigatinib	TRUE
EOC175	FKBP1A	gain	FKBP1A:ENST00000400137:e.2::BPIFB3:ENST00000375494:antisense	chr20:1392208::chr20:33049492	truncated_transcripts	4-5	3	FALSE	FALSE	FALSE	NA	TRUE	FALSE	TRUE	NA	X	Everolimus, Sirolimus, Tacrolimus Anhydrous, Temsirolimus	FALSE
EOC175	JAK2	gain	JAK2:amp	NA	amplification	0	9-11	FALSE	FALSE	FALSE	NA	TRUE	FALSE	NA	NA	X	AZD-1480, BMS-911543, Fedratinib, Ruxolitinib	FALSE
EOC175	NF1	loss	RAB11FIP4:ENST00000621161:e.3::NF1:ENST00000358273:e.38	chr17:31326595::chr17:31500970	fusion	2	1	FALSE	FALSE	FALSE	NA	TRUE	TRUE	NA	FALSE	IIIA	Selumetinib	FALSE
EOC175	PDGFRB	gain	PDGFRB:NM_002609.4:exon10:c.1423C>T:p.Q475X	chr5:150129913G>A	stopgain	NA	NA	FALSE	FALSE	FALSE	NA	TRUE	FALSE	FALSE	NA	X	Catequentinib, Cediranib, CM-082, Crenolanib, Dasatinib, Dovitinib, ENMD-981693, Famitinib, Foretinib, Ilorasertib, Imatinib, Imatinib Mesylate, Pazopanib, Quizartinib, Regorafenib, Sorafenib, Sorafenib Tosylate, Sunitinib, Sunitinib Malate, Vatalanib, XL-820, XL-999	FALSE
EOC175	RAD51B	loss	RAD51B:ENST00000487861:e.8_10dup	chr14:68141166_68499831dup	frameshift_duplication	2	0	FALSE	FALSE	FALSE	NA	FALSE	TRUE	NA	FALSE	IIIA	Olaparib	FALSE
EOC175	TP53	loss	TP53:NM_000546.6:exon5:c.559+1G>A	chr17:7675052C>T	splicing	NA	NA	TRUE	TRUE	FALSE	NA	TRUE	TRUE	NA	TRUE	IVA	Adavosertib	TRUE
EOC177	AKT1	gain	AKT1:ENST00000649815:e.3::intergenic	chr14:104762816::chr14:104787452	truncated_transcripts	2	1	FALSE	FALSE	FALSE	NA	FALSE	TRUE	FALSE	NA	X	Afuresertib, Capivasertib, Fulvestrant, Ipatasertib, MK-2206, Triciribine Phosphate, Uprosertib	FALSE
EOC177	AKT3	gain	AKT3:ENST00000673466:e.7_8del;AKT3:ENST00000673466:e.6_7del;AKT3:ENST00000673466:e.5del	chr1:243613739_243615096del;chr1:243615161_243637611del;chr1:243637743_243645894del	multiple	4	NA	FALSE	FALSE	FALSE	NA	FALSE	TRUE	FALSE	NA	IVB	Capivasertib	FALSE
EOC177	CD47	gain	CD47:ENST00000361309:e.6_7del	chr3:108057569_108058337del	inframe_deletion	4	1	FALSE	FALSE	FALSE	NA	FALSE	TRUE	FALSE	NA	X	Magrolimab	FALSE
EOC177	CD74	gain	CD74:ENST00000009530:e.8del;CD74:ENST00000009530:e.6_7del	chr5:150402252_150402565del;chr5:150402626_150404681del	multiple	5	1	FALSE	FALSE	FALSE	NA	FALSE	TRUE	FALSE	NA	IVB	Repotrectinib	FALSE
EOC177	DDR2	gain	DDR2:NM_006182.4:exon9:c.884G>T:p.G295V	chr1:162761239G>T	nonsynonymous_SNV	NA	NA	FALSE	FALSE	FALSE	NA	FALSE	TRUE	FALSE	NA	IVB	Regorafenib	FALSE
EOC177	EPHA6	gain	EPHA6:ENST00000389672:e.4_5dup	chr3:97105328_97327063dup	inframe_duplication	1	1	FALSE	FALSE	FALSE	NA	FALSE	TRUE	FALSE	NA	IVB	Vandetanib	FALSE
EOC177	FYN	gain	FYN:ENST00000354650:e.7del	chr6:111704101_111707921del	frameshift_deletion	5	0	FALSE	FALSE	FALSE	NA	FALSE	TRUE	FALSE	NA	X	Dasatinib, ENMD-981693, Ilorasertib, JNJ-26483327	FALSE
EOC177	GRIN1	gain	GRIN1:NM_007327.4:exon17:c.2443delG:p.V816Sfs*5	chr9:137163667CGGTGCGTTCTCCTTCATCCATTCTCGGGTGGGTTCTCCGTGGGCTGCGGCCTCCCTGGCCAGCAACTGAGGCTCTGGGTCCCGGCACACA>C	frameshift_deletion	NA	NA	FALSE	FALSE	FALSE	NA	TRUE	FALSE	FALSE	NA	X	Memantine	FALSE
EOC177	GRIN1	gain	GRIN1:NM_007327.4:exon5:c.793delG:p.G265Afs*61	chr9:137156789CGGTGAGTGCTGGGCCTTGGCGGGGTCCCCGAACGGGGAGGACCCCACGGGCTCTGAGTCGCATGCTCGCCTA>C	frameshift_deletion	NA	NA	FALSE	FALSE	FALSE	NA	FALSE	FALSE	FALSE	NA	X	Memantine	FALSE
EOC177	GRIN2A	gain	GRIN2A:ENST00000330684:e.4::GALNS:ENST00000268695:e.11;CDT1:ENST00000301019:antisense::GRIN2A:ENST00000330684:e.5	chr16:9855843::chr16:88825925;chr16:9856070::chr16:88808294	balanced_translocation	0	1	FALSE	FALSE	FALSE	NA	FALSE	TRUE	FALSE	NA	X	Memantine	FALSE
EOC177	HDAC2	gain	HDAC2:ENST00000519065:e.1del	chr6:113963262_114068049del	5prime_deletion	4	0-1	FALSE	FALSE	FALSE	NA	FALSE	TRUE	FALSE	NA	X	Belinostat, CUDC-101, Entinostat, Mocetinostat, Panobinostat, Vorinostat	FALSE
EOC177	IGF1	gain	intergenic::IGF1:ENST00000337514:e.3	chr12:102383554::chr12:102475068	fusion_from_unknown	3	0-1	FALSE	FALSE	FALSE	NA	FALSE	TRUE	FALSE	NA	X	Dusigitumab	FALSE
EOC177	ITGAV	gain	ITGAV:ENST00000261023:e.9_10del	chr2:186638320_186638409del	frameshift_deletion	2	0	FALSE	FALSE	FALSE	NA	FALSE	TRUE	FALSE	NA	X	Etaracizumab	FALSE
EOC177	ITGB3	gain	ITGB3:NM_000212.3:exon10:c.1531G>A:p.E511K	chr17:47292409G>A	nonsynonymous_SNV	NA	NA	FALSE	FALSE	FALSE	NA	FALSE	FALSE	FALSE	NA	X	Etaracizumab	FALSE
EOC177	JAK1	gain	JAK1:ENST00000342505:e.6del	chr1:64867209_64869312del	frameshift_deletion	1	1	FALSE	FALSE	FALSE	NA	FALSE	TRUE	FALSE	NA	X	Itacitinib, Ruxolitinib	FALSE
EOC177	KRAS	gain	KRAS:amp	NA	amplification	1-3	2-15	FALSE	FALSE	TRUE	NA	FALSE	TRUE	TRUE	NA	IVB	Adagrasib, Sotorasib	TRUE
EOC177	NBN	loss	intergenic::NBN:ENST00000265433:e.16	chr8:40026460::chr8:89935911	fusion_from_unknown	3	1	FALSE	FALSE	FALSE	NA	FALSE	TRUE	NA	FALSE	IIIA	Talazoparib + Enzalutamide	FALSE
EOC177	NDUFA11	gain	NDUFA11:ENST00000308961:e.2del;NDUFA11:ENST00000308961:e.1_2del	chr19:5896577_5896907del;chr19:5896997_5903612del	multiple	1	0	FALSE	FALSE	FALSE	NA	FALSE	TRUE	FALSE	NA	X	Metformin	FALSE
EOC177	NDUFAF3	gain	NDUFAF3:ENST00000326925:e.1_2dup	chr3:49010451_49022471dup	truncated_duplication	0-1	1-2	FALSE	FALSE	FALSE	NA	FALSE	FALSE	FALSE	NA	X	Metformin	FALSE
EOC177	NDUFS7	gain	NDUFS7:ENST00000233627:e.2del;NDUFS7:ENST00000233627:e.3del	chr19:1387846_1388524del;chr19:1388591_1388831del	multiple	1	0	FALSE	FALSE	FALSE	NA	FALSE	TRUE	FALSE	NA	X	Metformin	FALSE
EOC177	NF1	loss	NF1:ENST00000358273:e.6del	chr17:31181488_31181709del	frameshift_deletion	1	1	FALSE	FALSE	FALSE	NA	FALSE	TRUE	NA	FALSE	IIIA	Selumetinib	FALSE
EOC177	NTRK2	gain	NTRK2:ENST00000277120:e.3_4del;NTRK2:ENST00000277120:e.4_5del;NTRK2:ENST00000277120:e.5_6del;NTRK2:ENST00000277120:e.8_9del;NTRK2:ENST00000277120:e.10del;NTRK2:ENST00000277120:e.11_12del;NTRK2:ENST00000277120:e.12del	chr9:84702233_84702348del;chr9:84702419_84707844del;chr9:84707912_84710637del;chr9:84724356_84727654del;chr9:84727960_84741893del;chr9:84741925_84744971del;chr9:84745073_84751986del;chr9:84752085_84810542del	multiple	1	NA	FALSE	FALSE	FALSE	NA	FALSE	TRUE	FALSE	NA	IC	Entrectinib, Larotrectinib, Repotrectinib	FALSE
EOC177	NTRK3	gain	NTRK3:ENST00000629765:e.14::GPRIN3:ENST00000609438:e.2	chr4:89275799::chr15:87989229	multiple	3-4	1	FALSE	FALSE	FALSE	NA	FALSE	TRUE	FALSE	NA	IC	Entrectinib, Larotrectinib, Repotrectinib	FALSE
EOC177	PIK3R1	gain	PIK3R1:ENST00000521381:e.10del	chr5:68293482_68293708del	frameshift_deletion	1	0	FALSE	FALSE	FALSE	NA	FALSE	TRUE	FALSE	NA	X	Apitolisib, BGT-226, Dactolisib, Gedatolisib, Omipalisib, PF-04691502, Pictilisib, Pilaralisib, SF-1126, Sonolisib, Voxtalisib	FALSE
EOC177	PPP2R1A	loss	PPP2R1A:ENST00000322088:e.2del	chr19:52202032_52205961del	frameshift_deletion	3	0	FALSE	FALSE	FALSE	NA	FALSE	TRUE	NA	FALSE	IVA	Lunresertib + Camonsertib	FALSE
EOC177	PSMA5	gain	PSMA5:ENST00000271308:e.8::SORT1:ENST00000256637:e.18	chr1:109315445::chr1:109409974	fusion	3	0	FALSE	FALSE	FALSE	NA	FALSE	TRUE	FALSE	NA	X	Bortezomib, Ixazomib, Ixazomib Citrate, Marizomib, Oprozomib	FALSE
EOC177	PSMA7	gain	PSMA7:ENST00000370873:e.2del;PSMA7:ENST00000370873:e.4_5del;PSMA7:ENST00000442551:e.2_3del	chr20:62139907_62140820del;chr20:62138290_62139075del	multiple	5	1	FALSE	FALSE	FALSE	NA	FALSE	TRUE	FALSE	NA	X	Bortezomib, Ixazomib, Ixazomib Citrate, Marizomib, Oprozomib	FALSE
EOC177	PSMB1	gain	PSMB1:ENST00000262193:e.2_3del	chr6:170546184_170549006del	frameshift_deletion	2	0	FALSE	FALSE	FALSE	NA	FALSE	TRUE	FALSE	NA	X	Bortezomib, Ixazomib, Ixazomib Citrate, Marizomib, Oprozomib	FALSE
EOC177	PSMB4	gain	PSMB4:ENST00000290541:e.3del;PSMB4:ENST00000290541:e.6del	chr1:151400587_151400763del;chr1:151401629_151401816del	multiple	4	1	FALSE	FALSE	FALSE	NA	FALSE	TRUE	FALSE	NA	X	Bortezomib, Ixazomib, Ixazomib Citrate, Marizomib, Oprozomib	FALSE
EOC177	PTK2	gain	PTK2:ENST00000696786:e.23del	chr8:140739108_140743231del	frameshift_deletion	7	0	FALSE	FALSE	FALSE	NA	FALSE	TRUE	FALSE	NA	X	Defactinib, GSK-2256098	FALSE
EOC177	PTK2B	gain	PTK2B:ENST00000346049:e.11del;PTK2B:ENST00000346049:e.12_13del;PTK2B:ENST00000519512:e.5_6del	chr8:27433551_27434092del;chr8:27434132_27434513del	multiple	1	0	FALSE	FALSE	FALSE	NA	FALSE	TRUE	FALSE	NA	X	Defactinib	FALSE
EOC177	ROS1	gain	ROS1:ENST00000368507:e.26del	chr6:117355723_117357187del	frameshift_deletion	1	1	FALSE	FALSE	FALSE	NA	FALSE	TRUE	FALSE	NA	X	Cabozantinib, Ceritinib, Crizotinib, Entrectinib, Lorlatinib, Repotrectinib, Taletrectinib	FALSE
EOC177	TP53	loss	TP53:NM_000546.6:exon7:c.730G>A:p.G244S	chr17:7674233C>T	nonsynonymous_SNV	NA	NA	TRUE	TRUE	TRUE	NA	TRUE	TRUE	NA	TRUE	IVA	Adavosertib	TRUE
EOC182	COL4A4	gain	COL4A4:NM_000092.5:exon42:c.4055G>T:p.G1352V	chr2:227027928C>A	nonsynonymous_SNV	NA	NA	FALSE	FALSE	FALSE	NA	TRUE	TRUE	FALSE	NA	X	TRC-093	FALSE
EOC182	ERBB4	gain	ERBB4:ENST00000342788:e.1::SPAG16:ENST00000331683:antisense	chr2:212451782::chr2:213690695	truncated_transcripts	2	1	FALSE	FALSE	FALSE	NA	FALSE	TRUE	FALSE	NA	X	AC-480, Afatinib, BMS-690514, Dacomitinib, Dacomitinib Anhydrous, JNJ-26483327, Neratinib, Poziotinib, Vandetanib	FALSE
EOC182	NF1	loss	NF1:NM_001042492.3:exon46:c.6850_6853del:p.Y2285Tfs*5	chr17:31338733CACTT>C	frameshift_deletion	NA	NA	TRUE	TRUE	FALSE	NA	TRUE	TRUE	NA	TRUE	IIIA	Selumetinib	TRUE
EOC182	NRG1	gain	NRG1:ENST00000356819:e.4del	chr8:32613538_32614692del	inframe_deletion	0-1	1-2	FALSE	FALSE	FALSE	NA	TRUE	TRUE	FALSE	NA	IIIB	Zenocutuzumab	FALSE
EOC182	NTRK2	gain	NTRK2:ENST00000277120:e.1_2del	chr9:84620108_84671961del	5prime_deletion	1	1	FALSE	FALSE	FALSE	NA	TRUE	TRUE	FALSE	NA	X	Altiratinib, Entrectinib, Larotrectinib, Larotrectinib Sulfate, Repotrectinib, Selitrectinib, Taletrectinib, Zurletrectinib	FALSE
EOC182	RAD51C	loss	RAD51C:NM_058216.3:exon1:c.90delG:p.F32Sfs*8	NA	germline	NA	NA	NA	NA	NA	NA	NA	TRUE	NA	TRUE	IIIA	Olaparib, Talazoparib + Enzalutamide	TRUE
EOC182	TP53	loss	TP53:NM_000546.6:exon8:c.818G>A:p.R273H	chr17:7673802C>T	nonsynonymous_SNV	NA	NA	TRUE	TRUE	FALSE	NA	TRUE	TRUE	NA	TRUE	IVA	Adavosertib	TRUE
EOC183	BIRC2	gain	BIRC2:amp	NA	amplification	1	13-15	TRUE	TRUE	FALSE	NA	TRUE	TRUE	TRUE	NA	X	Birinapant	TRUE
EOC183	BIRC3	gain	BIRC3:amp	NA	amplification	1	13-15	FALSE	FALSE	FALSE	NA	TRUE	TRUE	FALSE	NA	X	Birinapant	FALSE
EOC183	EPHA6	gain	EPHA6:ENST00000389672:e.2_3del	chr3:96855490_97046627del	inframe_deletion	3	1	FALSE	FALSE	FALSE	NA	TRUE	TRUE	FALSE	NA	IVB	Vandetanib	FALSE
EOC183	IGF1R	gain	intergenic::IGF1R:ENST00000650285:e.2	chr11:55869721::chr15:98644783	fusion_from_unknown	3	1	FALSE	FALSE	FALSE	NA	FALSE	TRUE	FALSE	NA	X	Cixutumumab, Figitumumab, Ganitumab	FALSE
EOC183	IGF2	gain	IGF2:NM_000612.6:exon2:c.79C>T:p.R27C	chr11:2135445G>A	nonsynonymous_SNV	NA	NA	FALSE	FALSE	FALSE	NA	TRUE	FALSE	FALSE	NA	X	Dusigitumab	FALSE
EOC183	JAK2	gain	JAK2:amp	NA	amplification	0	9-11	FALSE	FALSE	FALSE	NA	TRUE	FALSE	NA	NA	X	AZD-1480, BMS-911543, Fedratinib, Ruxolitinib	FALSE
EOC183	KLRC1	gain	KLRC1:amp	NA	amplification	1	9-14	FALSE	FALSE	FALSE	NA	TRUE	FALSE	NA	NA	X	Monalizumab	FALSE
EOC183	MDM2	gain	MDM2:amp	NA	amplification	1	10-11	TRUE	TRUE	FALSE	NA	TRUE	TRUE	TRUE	NA	IVB	Brigimadlin, Milademetan	TRUE
EOC183	NDUFA9	gain	NDUFA9:amp	NA	amplification	1	3-7	FALSE	TRUE	FALSE	NA	FALSE	TRUE	TRUE	NA	X	Metformin	TRUE
EOC183	NDUFS5	gain	NDUFS5:amp	NA	amplification	1	5-8	FALSE	FALSE	FALSE	NA	FALSE	FALSE	NA	NA	X	Metformin	FALSE
EOC183	NTRK2	gain	NTRK2:ENST00000277120:e.2::intergenic;NTRK2:ENST00000277120:e.8::TRPM3:ENST00000677713:antisense;intergenic::NTRK2:ENST00000277120:e.15;NTRK2:ENST00000277120:e.12::BORCS5:ENST00000314565:e.3;NTRK2:ENST00000277120:e.12::ARHGAP17:ENST00000289968:e.2	chr9:3622294::chr9:84696844;chr9:70599197::chr9:84727074;chr9:84900814::chr12:46020776;chr9:84820573::chr12:12400227;chr9:84860016::chr16:24983263	multiple	2	NA	FALSE	TRUE	FALSE	NA	TRUE	TRUE	TRUE	NA	IC	Entrectinib, Larotrectinib, Repotrectinib	TRUE
EOC183	PSMA8	gain	PSMA8:amp	NA	amplification	1	6-9	FALSE	FALSE	FALSE	NA	FALSE	FALSE	NA	NA	X	Bortezomib, Ixazomib, Ixazomib Citrate, Marizomib, Oprozomib	FALSE
EOC183	PSMB2	gain	PSMB2:amp	NA	amplification	1-2	6	FALSE	FALSE	FALSE	NA	FALSE	FALSE	NA	NA	X	Bortezomib, Ixazomib, Ixazomib Citrate, Marizomib, Oprozomib	FALSE
EOC183	TP53	loss	TP53:NM_000546.6:exon5:c.455delC:p.P152Rfs*18	chr17:7675156CG>C	frameshift_deletion	NA	NA	TRUE	TRUE	FALSE	NA	TRUE	TRUE	NA	TRUE	IVA	Adavosertib	TRUE
EOC190	AKT3	gain	AKT3:ENST00000673466:e.2::CATSPERE:ENST00000366534:antisense	chr1:243840994::chr1:244634140	truncated_transcripts	4	1	FALSE	FALSE	FALSE	NA	FALSE	FALSE	FALSE	NA	X	Afuresertib, Capivasertib, Ipatasertib, MK-2206, Triciribine Phosphate, Uprosertib	FALSE
EOC190	ATP4A	gain	ATP4A:amp	NA	amplification	1	9-10	FALSE	FALSE	FALSE	NA	TRUE	FALSE	NA	NA	X	Rabeprazole	FALSE
EOC190	CCNE1	gain	CCNE1:amp	NA	amplification	1	23-24	TRUE	TRUE	TRUE	NA	TRUE	TRUE	TRUE	NA	IVA	Lunresertib + Camonsertib	TRUE
EOC190	CD22	gain	CD22:amp	NA	amplification	1	9-10	FALSE	FALSE	FALSE	NA	TRUE	TRUE	FALSE	NA	X	Epratuzumab	FALSE
EOC190	COL4A4	gain	COL4A4:NM_000092.5:exon40:c.3745A>G:p.R1249G	chr2:227032017T>C	nonsynonymous_SNV	NA	NA	FALSE	FALSE	FALSE	NA	TRUE	FALSE	FALSE	NA	X	TRC-093	FALSE
EOC190	CXCL8	gain	CXCL8:amp	NA	amplification	1	16-19	FALSE	FALSE	FALSE	NA	TRUE	FALSE	NA	NA	X	Adakitug	FALSE
EOC190	EPHA5	gain	EPHA5:ENST00000613740:e.8::SCARB2:ENST00000264896:e.2	chr4:65383662::chr4:76232018	fusion	4	12-14	FALSE	FALSE	FALSE	NA	TRUE	TRUE	FALSE	NA	IVB	Vandetanib	FALSE
EOC190	EPHA5	gain	EPHA5:amp	NA	amplification	1	17-18	FALSE	FALSE	FALSE	NA	TRUE	FALSE	NA	NA	X	Vandetanib	FALSE
EOC190	ESR1	gain	ESR1:ENST00000206249:e.3del	chr6:151855746_151937745del	inframe_deletion	2-3	1	FALSE	FALSE	FALSE	NA	TRUE	TRUE	FALSE	NA	IIIB	Elacestrant	FALSE
EOC190	IGF1R	gain	IGF1R:NM_000875.5:exon10:c.2156G>A:p.R719H	chr15:98916831G>A	nonsynonymous_SNV	NA	NA	FALSE	FALSE	FALSE	NA	FALSE	FALSE	FALSE	NA	X	Cixutumumab, Figitumumab, Ganitumab	FALSE
EOC190	NDUFS5	gain	NDUFS5:amp	NA	amplification	2	8-10	FALSE	FALSE	FALSE	NA	TRUE	FALSE	NA	NA	X	Metformin	FALSE
EOC190	NF1	loss	NF1:NM_001042492.3:exon30:c.4021C>T:p.Q1341X	chr17:31249030C>T	stopgain	NA	NA	FALSE	FALSE	FALSE	NA	FALSE	TRUE	NA	FALSE	IIIA	Selumetinib	FALSE
EOC190	PIK3CG	gain	PIK3CG:amp	NA	amplification	1	6-8	FALSE	FALSE	FALSE	NA	FALSE	FALSE	NA	NA	X	Apitolisib, BGT-226, Dactolisib, Duvelisib, Gedatolisib, Omipalisib, PF-04691502, Pictilisib, Pilaralisib, SF-1126, Sonolisib, Voxtalisib	FALSE
EOC190	SYK	gain	intergenic::SYK:ENST00000375754:e.14	chr9:90893523::chr9:91491519	fusion_from_unknown	3	1	FALSE	FALSE	FALSE	NA	FALSE	TRUE	FALSE	NA	X	Entospletinib, Sovleplenib	FALSE
EOC190	TP53	loss	TP53:NM_000546.6:exon5:c.524G>A:p.R175H	chr17:7675088C>T	nonsynonymous_SNV	NA	NA	TRUE	TRUE	TRUE	NA	TRUE	TRUE	NA	TRUE	IVA	Adavosertib	TRUE
EOC191	ATP4A	gain	ATP4A:NM_000704.3:exon21:c.3034G>A:p.V1012I	chr19:35550879C>T	nonsynonymous_SNV	NA	NA	FALSE	FALSE	FALSE	NA	FALSE	FALSE	FALSE	NA	X	Rabeprazole	FALSE
EOC191	CDK6	gain	intergenic::CDK6:ENST00000424848:e.3	chr7:92798200::chr7:106762613	fusion_from_unknown	4	1	FALSE	FALSE	FALSE	NA	FALSE	TRUE	FALSE	NA	IVB	Abemaciclib, Palbociclib, Ribociclib	FALSE
EOC191	EGFR	gain	EGFR:ENST00000275493:e.3::CHCHD2:ENST00000395422:e.2;EGFR:ENST00000275493:e.7::intergenic;EGFR:ENST00000275493:e.4::intergenic;EGFR:ENST00000275493:antisense::EGFR:ENST00000275493:e.4;EGFR:ENST00000275493:antisense::EGFR:ENST00000275493:e.5	chr7:55146485::chr7:56109407;chr2:103640246::chr7:55155267;chr2:103622849::chr7:55146772;chr7:55146491::chr7:55146833	multiple	3	NA	FALSE	FALSE	FALSE	NA	TRUE	TRUE	FALSE	NA	IIIB	Erlotinib, Cetuximab, Cetuximab + Chemotherapy, Panitumumab, Panitumumab + Chemotherapy, Afatinib, Amivantamab + Chemotherapy, Amivantamab + Lazertinib, Dacomitinib, Erlotinib + Ramucirumab, Gefitinib, Osimertinib, Osimertinib + Chemotherapy, Amivantamab	FALSE
EOC191	EPHA6	gain	EPHA6:NM_001080448.3:exon6:c.1692T>G:p.N564K	chr3:97405235T>G	nonsynonymous_SNV	NA	NA	FALSE	FALSE	FALSE	NA	TRUE	FALSE	FALSE	NA	X	Vandetanib	FALSE
EOC191	EPHA8	gain	EPHA8:NM_020526.5:exon4:c.859G>A:p.D287N	chr1:22586515G>A	nonsynonymous_SNV	NA	NA	FALSE	FALSE	FALSE	NA	TRUE	FALSE	FALSE	NA	X	Vandetanib	FALSE
EOC191	FYN	gain	FYN:ENST00000354650:e.1_2dup	chr6:111791833_111939508dup	truncated_duplication	1	1	FALSE	FALSE	FALSE	NA	FALSE	FALSE	FALSE	NA	X	Dasatinib, ENMD-981693, Ilorasertib, JNJ-26483327	FALSE
EOC191	MET	gain	MET:ENST00000397752:e.1_2dup	chr7:116666125_116713598dup	truncated_duplication	5	0	FALSE	FALSE	FALSE	NA	FALSE	FALSE	FALSE	NA	X	Altiratinib, AMG-208, AMG-337, Amivantamab, Cabozantinib, Cabozantinib S-Malate, Capmatinib, Crizotinib, Elzovantinib, Emibetuzumab, Foretinib, Glesatinib, Golvatinib, Merestinib, MK-2461, MK-8033, Onartuzumab, Savolitinib, Tepotinib, Tivantinib	FALSE
EOC191	NDUFB7	gain	NDUFB7:amp	NA	amplification	2	7	TRUE	TRUE	FALSE	NA	TRUE	TRUE	TRUE	NA	X	Metformin	TRUE
EOC191	PDE4D	gain	PDE4D:ENST00000340635:e.2_5del	chr5:59088871_59222547del	frameshift_deletion	1	1	FALSE	FALSE	FALSE	NA	FALSE	TRUE	FALSE	NA	X	Roflumilast	FALSE
EOC191	PTK2	gain	PTK2:ENST00000696786:e.24::AGO2:ENST00000220592:e.2	chr8:140621813::chr8:140737489	fusion	3	2-3	FALSE	FALSE	FALSE	NA	TRUE	TRUE	FALSE	NA	X	Defactinib, GSK-2256098	FALSE
EOC191	SDC4	gain	SDC4:ENST00000372733:e.1::intergenic	chr20:45279671::chr20:45336334	truncated_transcripts	3	1	FALSE	FALSE	FALSE	NA	FALSE	TRUE	FALSE	NA	X	Repotrectinib	FALSE
EOC191	SLC6A4	gain	SLC6A4:NM_001045.6:exon3:c.334_343del:p.N112Gfs*147	chr17:30221602CCTGTGATACTGACCCCCTCCATT>C	frameshift_deletion	NA	NA	FALSE	FALSE	FALSE	NA	FALSE	FALSE	FALSE	NA	X	Escitalopram	FALSE
EOC191	TP53	loss	TP53:NM_000546.6:exon10:c.1009C>T:p.R337C	chr17:7670700G>A	nonsynonymous_SNV	NA	NA	TRUE	TRUE	FALSE	NA	TRUE	TRUE	NA	TRUE	IVA	Adavosertib	TRUE
EOC192	ARID1A	loss	ARID1A:NM_006015.6:exon11:c.3133_3142del:p.G1045Lfs*11	chr1:26767933GGGTAGGAAAC>G	frameshift_deletion	NA	NA	FALSE	FALSE	FALSE	NA	FALSE	TRUE	NA	FALSE	IVA	PLX2853, Tazemetostat	FALSE
EOC192	CCNE1	gain	CCNE1:amp	NA	amplification	1-2	2-26	FALSE	TRUE	FALSE	NA	FALSE	TRUE	TRUE	NA	IVA	Lunresertib + Camonsertib	TRUE
EOC192	NDUFB7	gain	NDUFB7:ENST00000215565:e.2::intergenic	chr19:14566897::chr19:14918286	truncated_transcripts	4	1	FALSE	FALSE	FALSE	NA	FALSE	FALSE	FALSE	NA	X	Metformin	FALSE
EOC192	NF1	loss	NF1:NM_001042492.3:exon51:c.7481G>A:p.W2494X	chr17:31352280G>A	stopgain	NA	NA	TRUE	FALSE	FALSE	NA	FALSE	TRUE	NA	TRUE	IIIA	Selumetinib	TRUE
EOC192	PDE4A	gain	PDE4A:NM_001111307.2:exon8:c.938C>T:p.A313V	chr19:10457939C>T	nonsynonymous_SNV	NA	NA	FALSE	FALSE	FALSE	NA	FALSE	FALSE	FALSE	NA	X	Roflumilast	FALSE
EOC192	TP53	loss	TP53:NM_000546.6:exon8:c.824G>A:p.C275Y	chr17:7673796C>T	nonsynonymous_SNV	NA	NA	TRUE	TRUE	TRUE	NA	TRUE	TRUE	NA	TRUE	IVA	Adavosertib	TRUE
EOC196	AR	gain	AR:NM_000044.6:exon1:c.1211C>T:p.A404V	chrX:67546357C>T	nonsynonymous_SNV	NA	NA	FALSE	FALSE	FALSE	NA	FALSE	FALSE	FALSE	NA	X	Abiraterone, Apalutamide, Darolutamide, Enzalutamide	FALSE
EOC196	CD22	gain	CD22:NM_001771.4:exon9:c.1789C>T:p.R597C	chr19:35341719C>T	nonsynonymous_SNV	NA	NA	FALSE	FALSE	FALSE	NA	FALSE	TRUE	FALSE	NA	X	Epratuzumab	FALSE
EOC196	KRAS	gain	KRAS:NM_004985.5:exon2:c.35G>T:p.G12V,KRAS:NM_033360.4:exon2:c.35G>T:p.G12V	chr12:25245350C>A	nonsynonymous_SNV	NA	NA	TRUE	TRUE	FALSE	NA	TRUE	TRUE	TRUE	NA	IIIA	Cobimetinib, Trametinib	TRUE
EOC196	TP53	loss	TP53:NM_000546.6:exon7:c.782+2->G	chr17:7674179:A>AC	splicing	NA	NA	TRUE	TRUE	TRUE	FALSE	TRUE	TRUE	NA	TRUE	IVA	Adavosertib	TRUE
EOC197	KIF5B	gain	KIF5B:NM_004521.3:exon12:c.1273A>G:p.I425V	chr10:32033877T>C	nonsynonymous_SNV	NA	NA	FALSE	FALSE	FALSE	NA	TRUE	FALSE	TRUE	NA	X	Pralsetinib, Selpercatinib	FALSE
EOC197	NDUFA5	gain	NDUFA5:ENST00000355749:e.5del	chr7:123541541_123541722del	inframe_deletion	1	1	FALSE	FALSE	FALSE	NA	TRUE	TRUE	FALSE	NA	X	Metformin	FALSE
EOC197	NF1	loss	NF1:ENST00000358273:e.18_31del	chr17:31226276_31254402del	inframe_deletion	0	1-2	TRUE	TRUE	TRUE	NA	TRUE	TRUE	NA	TRUE	IIIA	Selumetinib	TRUE
EOC197	PIK3CB	gain	PIK3CB:NM_006219.3:exon4:c.343A>T:p.S115C	chr3:138755808T>A	nonsynonymous_SNV	NA	NA	TRUE	FALSE	FALSE	NA	TRUE	TRUE	TRUE	NA	IVB	AZD8186, GSK2636771	TRUE
EOC197	PTK2	gain	PTK2:ENST00000696786:e.30::DENND3:ENST00000519811:antisense	chr8:140684299::chr8:141143377	truncated_transcripts	5	1	TRUE	TRUE	FALSE	NA	TRUE	TRUE	TRUE	NA	X	Defactinib, GSK-2256098	TRUE
EOC197	RAD51C	loss	RAD51C:NM_058216.3:exon7:c.935G>A:p.R312Q	chr17:58724070G>A	nonsynonymous_SNV	NA	NA	TRUE	TRUE	TRUE	NA	TRUE	TRUE	NA	TRUE	IIIA	Olaparib, Talazoparib + Enzalutamide	TRUE
EOC197	TP53	loss	TP53:NM_000546.6:exon7:c.725G>T:p.C242F	chr17:7674238C>A	nonsynonymous_SNV	NA	NA	TRUE	TRUE	TRUE	NA	TRUE	TRUE	NA	TRUE	IVA	Adavosertib	TRUE
EOC198	BRCA1	loss	BRCA1:NM_007294.4:exon10:c.3947_3950del:p.F1316*	chr17:43091580CAAGA>C	stopgain	NA	NA	TRUE	TRUE	FALSE	NA	TRUE	TRUE	NA	TRUE	IA	Niraparib, Olaparib, Olaparib + Bevacizumab, Rucaparib	TRUE
EOC198	CD47	gain	intergenic::CD47:ENST00000361309:e.11	chr3:107830729::chr3:108047300	fusion_from_unknown	2	0	FALSE	FALSE	FALSE	NA	FALSE	TRUE	FALSE	NA	X	Magrolimab	FALSE
EOC198	ERBB4	gain	ERBB4:ENST00000342788:e.1::intergenic	chr2:212406537::chr2:212683743	truncated_transcripts	2	0	FALSE	FALSE	FALSE	NA	FALSE	TRUE	FALSE	NA	X	AC-480, Afatinib, BMS-690514, Dacomitinib, Dacomitinib Anhydrous, JNJ-26483327, Neratinib, Poziotinib, Vandetanib	FALSE
EOC198	FGFR3	gain	FGFR3:NM_000142.5:exon18:c.2389G>T:p.A797S	chr4:1807230G>T	nonsynonymous_SNV	NA	NA	FALSE	FALSE	FALSE	NA	TRUE	FALSE	FALSE	NA	X	AZD-4547, Brivanib, Brivanib Alaninate, Dovitinib, ENMD-2076, ENMD-981693, Erdafitinib, Fexagratinib, Futibatinib, Infigratinib, Pazopanib, Pemigatinib, Rogaratinib, XL-999	FALSE
EOC198	NDUFB6	gain	NDUFB6:ENST00000379847:e.2::intergenic	chr1:98589623::chr9:32561535	truncated_transcripts	1	1	FALSE	FALSE	FALSE	NA	TRUE	FALSE	FALSE	NA	X	Metformin	FALSE
EOC198	NF1	loss	NF1:NM_001042492.3:exon16:c.1790_1824del:p.L597Qfs*5	chr17:31223511CTCAAGTGGTTGCGGGAAATATTGATCTGCAGGAAT>C	frameshift_deletion	NA	NA	TRUE	TRUE	FALSE	NA	TRUE	TRUE	NA	TRUE	IIIA	Selumetinib	TRUE
EOC198	PDE4D	gain	PDE4D:ENST00000340635:e.7_11dup	chr5:58987212_58995471dup	frameshift_duplication	0	1	FALSE	FALSE	FALSE	NA	TRUE	TRUE	FALSE	NA	X	Roflumilast	FALSE
EOC198	TP53	loss	TP53:NM_000546.6:exon6:c.578A>G:p.H193R	chr17:7674953T>C	nonsynonymous_SNV	NA	NA	TRUE	TRUE	FALSE	NA	TRUE	TRUE	NA	TRUE	IVA	Adavosertib	TRUE
EOC202	EPHA10	gain	EPHA10:NM_001099439.2:exon5:c.1090G>T:p.D364Y	chr1:37753143C>A	nonsynonymous_SNV	NA	NA	FALSE	FALSE	FALSE	NA	TRUE	TRUE	FALSE	NA	IVB	Vandetanib	FALSE
EOC202	EPHA7	gain	EPHA7:ENST00000369303:e.3::intergenic;intergenic::EPHA7:ENST00000369303:e.4	chr6:93360650::chr6:103090972;chr6:93360637::chr6:103090958	balanced_translocation	1	1	FALSE	TRUE	FALSE	NA	FALSE	TRUE	TRUE	NA	IVB	Vandetanib	TRUE
EOC202	GSK3B	gain	GSK3B:ENST00000264235:e.8::ZNF202:ENST00000530393:antisense;ZNF202:ENST00000530393:antisense::GSK3B:ENST00000264235:e.9	chr3:119874872::chr11:123745991;chr3:119874836::chr11:123746040	balanced_translocation	1-2	1	FALSE	FALSE	FALSE	NA	TRUE	TRUE	FALSE	NA	X	LY-2090314	FALSE
EOC202	MET	gain	MET:NM_000245.4:exon14:c.2899G>A:p.E967K	chr7:116771860G>A	nonsynonymous_SNV	NA	NA	FALSE	FALSE	FALSE	NA	FALSE	FALSE	FALSE	NA	X	Altiratinib, AMG-208, AMG-337, Amivantamab, Cabozantinib, Cabozantinib S-Malate, Capmatinib, Crizotinib, Elzovantinib, Emibetuzumab, Foretinib, Glesatinib, Golvatinib, Merestinib, MK-2461, MK-8033, Onartuzumab, Savolitinib, Tepotinib, Tivantinib	FALSE
EOC202	PARP1	gain	PARP1:NM_001618.4:exon12:c.1737G>C:p.K579N	chr1:226379150C>G	nonsynonymous_SNV	NA	NA	FALSE	FALSE	FALSE	NA	FALSE	FALSE	FALSE	NA	X	Niraparib, Olaparib, Pamiparib, Rucaparib, Senaparib, Talazoparib, Veliparib	FALSE
EOC202	PIK3CG	gain	DAB1:ENST00000371236:e.1::PIK3CG:ENST00000496166:e.11;PIK3CG:ENST00000496166:e.10::DAB1:ENST00000371236:e.2	chr1:57294332::chr7:106903473;chr1:57294319::chr7:106903504	balanced_translocation	1-2	0-1	FALSE	FALSE	FALSE	NA	TRUE	TRUE	FALSE	NA	X	Apitolisib, BGT-226, Dactolisib, Duvelisib, Gedatolisib, Omipalisib, PF-04691502, Pictilisib, Pilaralisib, SF-1126, Sonolisib, Voxtalisib	FALSE
EOC202	PPP2R1A	loss	PPP2R1A:NM_014225.6:exon10:c.1129-2A>T	chr19:52219689A>T	splicing	NA	NA	FALSE	FALSE	TRUE	NA	FALSE	TRUE	NA	TRUE	IVA	Lunresertib + Camonsertib	TRUE
EOC202	SLC6A2	gain	SLC6A2:NM_001172501.3:exon2:c.58G>T:p.G20C	chr16:55656752G>T	nonsynonymous_SNV	NA	NA	FALSE	FALSE	FALSE	NA	TRUE	FALSE	FALSE	NA	X	Atomoxetine	FALSE
EOC202	TP53	loss	TP53:NM_000546.6:exon8:c.814G>A:p.V272M	chr17:7673806C>T	nonsynonymous_SNV	NA	NA	FALSE	TRUE	TRUE	NA	TRUE	TRUE	NA	TRUE	IVA	Adavosertib	TRUE
EOC202	YES1	gain	YES1:NM_005433.4:exon12:c.1611C>A:p.Y537X	chr18:724445G>T	stopgain	NA	NA	FALSE	FALSE	FALSE	NA	FALSE	FALSE	TRUE	NA	X	Dasatinib, ENMD-981693, Ilorasertib, JNJ-26483327	FALSE
EOC204	APEX1	gain	APEX1:amp	NA	amplification	1	1-18	TRUE	FALSE	FALSE	NA	FALSE	TRUE	TRUE	NA	X	APX-3330	TRUE
EOC204	GRIN2A	gain	GRIN2A:ENST00000330684:e.9::RBFOX1:ENST00000550418:antisense;intergenic::GRIN2A:ENST00000330684:e.5	chr16:6096292::chr16:9827609;chr16:9857818::chr16:13310944	balanced_translocation	2-3	2	FALSE	FALSE	FALSE	NA	TRUE	TRUE	FALSE	NA	X	Memantine	FALSE
EOC204	GRIN2B	gain	GRIN2B:ENST00000609686:e.4::intergenic;GRIN2B:ENST00000609686:antisense::GRIN2B:ENST00000609686:e.5	chr1:95993293::chr12:13719308;chr12:13719315::chr12:13719500	multiple	5	2	FALSE	FALSE	FALSE	NA	FALSE	TRUE	FALSE	NA	X	Memantine	FALSE
EOC204	GRIN2B	gain	GRIN2B:amp	NA	amplification	2-3	4-8	FALSE	FALSE	FALSE	NA	FALSE	FALSE	NA	NA	X	Memantine	FALSE
EOC204	IDH2	gain	IDH2:amp	NA	amplification	1	10-21	FALSE	FALSE	FALSE	NA	TRUE	FALSE	NA	NA	X	Enasidenib, Vorasidenib	FALSE
EOC204	IGF1R	gain	IGF1R:amp	NA	amplification	1	10-11	TRUE	TRUE	FALSE	NA	TRUE	TRUE	TRUE	NA	X	Cixutumumab, Figitumumab, Ganitumab	TRUE
EOC204	KLRC1	gain	KLRC1:amp	NA	amplification	2-3	7-10	FALSE	FALSE	FALSE	NA	FALSE	FALSE	NA	NA	X	Monalizumab	FALSE
EOC204	LAG3	gain	LAG3:amp	NA	amplification	2-3	7-10	FALSE	FALSE	FALSE	NA	FALSE	FALSE	NA	NA	X	Fianlimab, Relatlimab	FALSE
EOC204	NDUFA9	gain	NDUFA9:amp	NA	amplification	2-3	8-12	TRUE	FALSE	FALSE	NA	FALSE	TRUE	TRUE	NA	X	Metformin	TRUE
EOC204	NTRK3	gain	intergenic::NTRK3:ENST00000629765:e.14	chr14:30541090::chr15:88045150	fusion_from_unknown	15	2	FALSE	FALSE	FALSE	NA	FALSE	TRUE	FALSE	NA	IC	Entrectinib, Larotrectinib, Repotrectinib	FALSE
EOC204	NTRK3	gain	NTRK3:amp	NA	amplification	1	10-16	FALSE	FALSE	FALSE	NA	TRUE	FALSE	NA	NA	X	Altiratinib, Entrectinib, Larotrectinib, Larotrectinib Sulfate, Repotrectinib, Selitrectinib, Taletrectinib, Zurletrectinib	FALSE
EOC204	PARP2	gain	PARP2:amp	NA	amplification	1	1-18	TRUE	FALSE	FALSE	NA	FALSE	TRUE	TRUE	NA	IVB	Niraparib, Olaparib, Rucaparib, Talazoparib	TRUE
EOC204	PNP	gain	PNP:amp	NA	amplification	1	1-18	FALSE	FALSE	FALSE	NA	FALSE	FALSE	NA	NA	X	Forodesine, Forodesine Hydrochloride	FALSE
EOC204	PSMA6	gain	PSMA6:amp	NA	amplification	1	1-13	FALSE	FALSE	FALSE	NA	FALSE	FALSE	NA	NA	X	Bortezomib, Ixazomib, Ixazomib Citrate, Marizomib, Oprozomib	FALSE
EOC204	SRSF2	loss	SRSF2:NM_001195427.2:exon2:c.620A>G:p.K207R	chr17:76736207T>C	nonsynonymous_SNV	NA	NA	FALSE	FALSE	FALSE	NA	FALSE	FALSE	NA	FALSE	X	Ceralasertib	FALSE
EOC204	TP53	loss	TP53:NM_000546.6:exon5:c.524G>A:p.R175H	chr17:7675088C>T	nonsynonymous_SNV	NA	NA	TRUE	TRUE	FALSE	NA	TRUE	TRUE	NA	TRUE	IVA	Adavosertib	TRUE
EOC206	ADRA1B	gain	ADRA1B:amp	NA	amplification	1	2-21	FALSE	FALSE	FALSE	NA	FALSE	FALSE	NA	NA	X	Carvedilol	FALSE
EOC206	AR	gain	AR:amp	NA	amplification	1	1-17	FALSE	FALSE	FALSE	NA	FALSE	FALSE	NA	NA	X	Abiraterone, Apalutamide, Darolutamide, Enzalutamide	FALSE
EOC206	AR	gain	AR:ENST00000374690:e.1::intergenic	chr10:4347819::chrX:67559305	truncated_transcripts	17	1	FALSE	FALSE	FALSE	NA	FALSE	TRUE	FALSE	NA	X	Abiraterone, Apalutamide, Darolutamide, Enzalutamide	FALSE
EOC206	CCNE1	gain	CCNE1:amp	NA	amplification	0	8-10	FALSE	FALSE	FALSE	NA	FALSE	TRUE	FALSE	NA	IVA	Lunresertib + Camonsertib	FALSE
EOC206	CD22	gain	CD22:ENST00000085219:e.6::intergenic	chr19:31026484::chr19:35338625	truncated_transcripts	2	1	FALSE	FALSE	FALSE	NA	TRUE	TRUE	FALSE	NA	X	Epratuzumab	FALSE
EOC206	EGFR	gain	EGFR:NM_005228.5:exon20:c.2386G>C:p.G796R	chr7:55181395G>C	nonsynonymous_SNV	NA	NA	FALSE	FALSE	FALSE	NA	FALSE	TRUE	FALSE	NA	IIIB	Erlotinib, Cetuximab, Cetuximab + Chemotherapy, Panitumumab, Panitumumab + Chemotherapy, Afatinib, Amivantamab + Chemotherapy, Amivantamab + Lazertinib, Dacomitinib, Erlotinib + Ramucirumab, Gefitinib, Osimertinib, Osimertinib + Chemotherapy, Amivantamab	FALSE
EOC206	EPHA3	gain	EPHA3:NM_005233.6:exon6:c.1387C>A:p.P463T	chr3:89395917C>A	nonsynonymous_SNV	NA	NA	FALSE	FALSE	FALSE	NA	FALSE	TRUE	FALSE	NA	IVB	Vandetanib	FALSE
EOC206	GRIN3A	gain	ALDOB:ENST00000647789:e.0::GRIN3A:ENST00000361820:e.4	chr9:101446838::chr9:101667997	promoter_hijacking	2	1	FALSE	FALSE	FALSE	NA	FALSE	TRUE	FALSE	NA	X	Memantine	FALSE
EOC206	GRIN3B	gain	GRIN3B:NM_138690.3:exon2:c.466G>A:p.E156K	chr19:1003169G>A	nonsynonymous_SNV	NA	NA	FALSE	FALSE	FALSE	NA	TRUE	FALSE	FALSE	NA	X	Memantine	FALSE
EOC206	HDAC7	gain	SP7:ENST00000536324:e.2::HDAC7:ENST00000080059:e.2	chr12:47823899::chr12:53329517	fusion	2	1	FALSE	FALSE	FALSE	NA	FALSE	TRUE	FALSE	NA	X	Belinostat, CUDC-101, Entinostat, Panobinostat	FALSE
EOC206	NDUFA13	gain	NDUFA13:amp	NA	amplification	0	6-8	FALSE	FALSE	FALSE	NA	FALSE	FALSE	NA	NA	X	Metformin	FALSE
EOC206	NDUFA13	gain	NDUFA13:ENST00000507754:e.1::NACC1:ENST00000292431:e.2	chr19:13125015::chr19:19523465	fusion	2	4-6	FALSE	FALSE	TRUE	NA	TRUE	TRUE	TRUE	NA	X	Metformin	TRUE
EOC206	NTRK3	gain	NTRK3:NM_001012338.3:exon16:c.1819T>C:p.C607R	chr15:87933082A>G	nonsynonymous_SNV	NA	NA	FALSE	FALSE	FALSE	NA	FALSE	TRUE	FALSE	NA	IIIB	Entrectinib, Larotrectinib, Repotrectinib, Selitrectinib	FALSE
EOC206	PPP2R1A	loss	PPP2R1A:NM_014225.6:exon5:c.548G>A:p.R183Q	chr19:52212730G>A	nonsynonymous_SNV	NA	NA	FALSE	FALSE	FALSE	NA	FALSE	TRUE	NA	FALSE	IVA	Lunresertib + Camonsertib	FALSE
EOC206	PSMD4	gain	POGZ:ENST00000271715:antisense::PSMD4:ENST00000368884:e.2	chr1:151257785::chr1:151413950	fusion_from_unknown	5	1	FALSE	FALSE	FALSE	NA	FALSE	TRUE	FALSE	NA	X	Bortezomib, Ixazomib, Ixazomib Citrate, Oprozomib	FALSE
EOC206	RPS6KB1	gain	RPS6KB1:NM_003161.4:exon12:c.1055T>G:p.F352C	chr17:59936477T>G	nonsynonymous_SNV	NA	NA	FALSE	FALSE	TRUE	NA	FALSE	TRUE	TRUE	NA	X	LY-2584702	TRUE
EOC206	TP53	loss	TP53:NM_000546.6:exon8:c.818G>A:p.R273H	chr17:7673802C>T	nonsynonymous_SNV	NA	NA	FALSE	FALSE	TRUE	NA	TRUE	TRUE	NA	TRUE	IVA	Adavosertib	TRUE
EOC207	ADRA1D	gain	intergenic::ADRA1D:ENST00000379453:e.2;ADRA1D:ENST00000379453:e.1::intergenic	chr6:10209919::chr20:4244042;chr6:10209874::chr20:4244059	balanced_translocation	4	1	FALSE	FALSE	FALSE	NA	FALSE	TRUE	FALSE	NA	X	Carvedilol	FALSE
EOC207	AKT1	gain	AKT1:ENST00000649815:e.3::NUDT14:ENST00000392568:e.2	chr14:104782123::chr14:105179020	fusion	2-3	1	FALSE	FALSE	TRUE	NA	TRUE	TRUE	TRUE	NA	IIIB	Capivasertib + Fulvestrant	TRUE
EOC207	BCR	gain	BCR:ENST00000305877:e.2::BCR:ENST00000305877:antisense	chr22:23254007::chr22:23255991	truncated_transcripts	2	1	FALSE	FALSE	FALSE	NA	FALSE	FALSE	FALSE	NA	X	Asciminib, Bosutinib, Dasatinib, Imatinib, Imatinib Mesylate, Nilotinib, Ponatinib, Ponatinib Hydrochloride	FALSE
EOC207	CHEK2	loss	CHEK2:ENST00000404276:e.5::SFI1:ENST00000400288:antisense	chr22:28714152::chr22:31536596	truncated_transcripts	2	1	FALSE	FALSE	FALSE	NA	TRUE	TRUE	NA	FALSE	IIIA	Olaparib, Talazoparib + Enzalutamide	FALSE
EOC207	CSF1	gain	CSF1:amp	NA	amplification	2-3	5-6	FALSE	FALSE	FALSE	NA	FALSE	FALSE	NA	NA	X	PD-360324	FALSE
EOC207	EML4	gain	EML4:ENST00000318522:e.1::PKDCC:ENST00000294964:e.4	chr2:42055015::chr2:42218746	fusion	3-4	1	FALSE	FALSE	FALSE	NA	TRUE	TRUE	FALSE	NA	IVB	Alectinib, Ceritinib, Crizotinib, Lorlatinib	FALSE
EOC207	ERBB4	gain	intergenic::ERBB4:ENST00000342788:e.21	chr2:210981748::chr2:211500041	fusion_from_unknown	4	1	FALSE	FALSE	FALSE	NA	TRUE	TRUE	FALSE	NA	IVB	Afatinib, Dacomitinib, Neratinib, Poziotinib, Vandetanib	FALSE
EOC207	EZH2	gain	EZH2:ENST00000320356:e.1::EZH2:ENST00000320356:antisense	chr7:148872021::chr7:148899871	truncated_transcripts	4-5	1	FALSE	FALSE	FALSE	NA	TRUE	TRUE	FALSE	NA	X	Tazemetostat	FALSE
EOC207	FGFR3	gain	FGFR3:amp	NA	amplification	0	16-18	TRUE	FALSE	TRUE	NA	TRUE	TRUE	TRUE	NA	IVB	Erdafitinib, Fexagratinib, Futibatinib, Pazopanib, Pemigatinib	TRUE
EOC207	HCK	gain	intergenic::HCK:ENST00000375852:e.2;ASXL1:ENST00000375687:e.4::HCK:ENST00000375852:e.2;HCK:ENST00000375852:e.1::intergenic	chr20:32058165::chr20:32245800;chr20:32057709::chr20:32402305;chr20:32058164::chr20:32245788	multiple	5-6	NA	FALSE	FALSE	FALSE	NA	TRUE	TRUE	FALSE	NA	IVB	Bosutinib, Dasatinib	FALSE
EOC207	HDAC6	gain	HDAC6:NM_006044.4:exon23:c.2243C>G:p.P748R	chrX:48820161C>G	nonsynonymous_SNV	NA	NA	FALSE	FALSE	FALSE	NA	TRUE	TRUE	FALSE	NA	X	Belinostat, CUDC-101, Entinostat, Panobinostat, Vorinostat	FALSE
EOC207	LYN	gain	LYN:ENST00000519728:e.10::intergenic;LYN:ENST00000519728:antisense::LYN:ENST00000519728:e.2;LYN:ENST00000519728:e.1::LYN:ENST00000519728:antisense	chr5:26220261::chr8:55988573;chr8:55854516::chr8:55884128;chr8:55900705::chr8:55903187	multiple	14	1	FALSE	FALSE	FALSE	NA	TRUE	TRUE	FALSE	NA	IVB	Bosutinib, Dasatinib	FALSE
EOC207	LYN	gain	LYN:amp	NA	amplification	1	14-15	FALSE	FALSE	FALSE	NA	TRUE	FALSE	NA	NA	X	Bosutinib, Dasatinib, ENMD-981693, Ilorasertib, JNJ-26483327	FALSE
EOC207	NDUFA7	gain	NDUFA7:amp	NA	amplification	1	4-8	TRUE	FALSE	FALSE	NA	FALSE	TRUE	TRUE	NA	X	Metformin	TRUE
EOC207	PLK4	gain	PLK4:NM_014264.5:exon7:c.1468A>G:p.R490G	chr4:127889874A>G	nonsynonymous_SNV	NA	NA	FALSE	FALSE	FALSE	NA	FALSE	FALSE	TRUE	NA	X	CFI-400945, Ocifisertib	FALSE
EOC207	TP53	loss	TP53:NM_000546.6:exon6:c.659A>G:p.Y220C	chr17:7674872T>C	nonsynonymous_SNV	NA	NA	TRUE	FALSE	TRUE	NA	TRUE	TRUE	NA	TRUE	IVA	Rezatapopt	TRUE
EOC215	BCR	gain	intergenic::BCR:ENST00000305877:e.9;BCR:ENST00000305877:e.15::KIAA1671:ENST00000358431:antisense	chr22:23282407::chr22:47739609;chr22:23294380::chr22:25149846	balanced_translocation	2	2	FALSE	FALSE	FALSE	NA	TRUE	TRUE	FALSE	NA	IVB	Asciminib, Bosutinib, Dasatinib, Imatinib, Nilotinib, Ponatinib	FALSE
EOC215	BRCA1	loss	BRCA1:NM_007294.4:exon10:c.3052_3053insTGAGA:p.N1018Mfs*8	NA	germline	NA	NA	NA	NA	NA	NA	NA	TRUE	NA	TRUE	IA	Niraparib, Olaparib, Olaparib + Bevacizumab, Rucaparib	TRUE
EOC215	CD3E	gain	CD3E:NM_000733.4:exon7:c.508G>A:p.G170S	chr11:118313862G>A	nonsynonymous_SNV	NA	NA	FALSE	FALSE	FALSE	NA	TRUE	FALSE	FALSE	NA	X	Catumaxomab, Teclistamab	FALSE
EOC215	MKNK1	gain	FAAH:ENST00000243167:antisense::MKNK1:ENST00000371945:e.9	chr1:46408203::chr1:46567885	fusion_from_unknown	8	1	FALSE	FALSE	FALSE	NA	FALSE	TRUE	FALSE	NA	X	Tomivosertib	FALSE
EOC215	NBN	loss	NBN:ENST00000265433:e.2_4del	chr8:89979577_89982742del	frameshift_deletion	4	1	FALSE	FALSE	FALSE	NA	FALSE	TRUE	NA	FALSE	IIIA	Talazoparib + Enzalutamide	FALSE
EOC215	PDE4B	gain	PDE4B:ENST00000341517:e.3::intergenic	chr1:66219250::chr1:66405045	truncated_transcripts	4-5	2-3	FALSE	FALSE	FALSE	NA	TRUE	TRUE	FALSE	NA	X	Roflumilast	FALSE
EOC215	RAD54L	loss	RAD54L:NM_003579.4:exon6:c.418C>A:p.P140T	chr1:46260552C>A	nonsynonymous_SNV	NA	NA	FALSE	FALSE	FALSE	NA	TRUE	FALSE	NA	FALSE	X	Olaparib	FALSE
EOC215	TP53	loss	TP53:NM_000546.6:exon7:c.742C>T:p.R248W	chr17:7674221G>A	nonsynonymous_SNV	NA	NA	TRUE	FALSE	TRUE	NA	TRUE	TRUE	NA	TRUE	IVA	Adavosertib	TRUE
EOC217	ERBB4	gain	ERBB4:ENST00000342788:e.1::intergenic	chr2:212500328::chr2:212929125	truncated_transcripts	2	0	FALSE	FALSE	FALSE	NA	FALSE	TRUE	FALSE	NA	X	AC-480, Afatinib, BMS-690514, Dacomitinib, Dacomitinib Anhydrous, JNJ-26483327, Neratinib, Poziotinib, Vandetanib	FALSE
EOC217	ITK	gain	ITK:NM_005546.4:exon4:c.452A>C:p.N151T	chr5:157214317A>C	nonsynonymous_SNV	NA	NA	FALSE	FALSE	FALSE	NA	FALSE	FALSE	NA	NA	X	Pazopanib	FALSE
EOC217	NF1	loss	NF1:ENST00000358273:e.9_12dup	chr17:31194440_31209318dup	inframe_duplication	0	1	TRUE	FALSE	TRUE	NA	TRUE	TRUE	NA	TRUE	IIIA	Selumetinib	TRUE
EOC217	RET	gain	RET:ENST00000355710:e.6_9dup	chr10:43107091_43113268dup	inframe_duplication	1	1	FALSE	FALSE	FALSE	NA	FALSE	TRUE	FALSE	NA	IIIA	Selpercatinib, Pralsetinib	FALSE
EOC217	TP53	loss	TP53:NM_000546.6:exon5:c.434T>C:p.L145P	chr17:7675178A>G	nonsynonymous_SNV	NA	NA	TRUE	FALSE	TRUE	NA	TRUE	TRUE	NA	TRUE	IVA	Adavosertib	TRUE
EOC218	APEX1	gain	APEX1:ENST00000216714:e.3_4del	chr14:20456101_20456668del	inframe_deletion	2	0	FALSE	FALSE	FALSE	NA	FALSE	TRUE	FALSE	NA	X	APX-3330	FALSE
EOC218	CD22	gain	CD22:ENST00000085219:e.9_10del;CD22:ENST00000085219:e.10del;CD22:ENST00000085219:e.11_12del	chr19:35341965_35344829del;chr19:35344924_35345050del;chr19:35345126_35345602del	multiple	2	NA	FALSE	FALSE	FALSE	NA	FALSE	TRUE	FALSE	NA	X	Epratuzumab	FALSE
EOC218	CD74	gain	CD74:ENST00000009530:e.8del;CD74:ENST00000009530:e.6_7del;CD74:ENST00000009530:e.6del;CD74:ENST00000009530:e.4del;CD74:ENST00000009530:e.3_4del;CD74:ENST00000009530:e.2_3del;CD74:ENST00000009530:e.1del	chr5:150402252_150402565del;chr5:150402626_150404681del;chr5:150404766_150405084del;chr5:150405181_150406260del;chr5:150406321_150406881del;chr5:150406960_150407152del;chr5:150407325_150412626del	multiple	1	NA	FALSE	FALSE	FALSE	NA	FALSE	TRUE	FALSE	NA	IVB	Repotrectinib	FALSE
EOC218	CDKN2A	loss	CDKN2A:del	NA	deletion	0	NA	TRUE	TRUE	FALSE	NA	TRUE	TRUE	NA	TRUE	IVA	Abemaciclib, Palbociclib, Ribociclib	TRUE
EOC218	DDB1	gain	DDB1:ENST00000301764:e.16del	chr11:61312085_61313500del	frameshift_deletion	2	0	FALSE	FALSE	FALSE	NA	FALSE	TRUE	FALSE	NA	X	Lenalidomide, Thalidomide	FALSE
EOC218	DHODH	gain	ATP5F1A:ENST00000398752:antisense::DHODH:ENST00000219240:e.2	chr16:72006027::chr18:46088237;chr16:72006384::chr18:46089996	multiple	2	1	FALSE	FALSE	FALSE	NA	FALSE	TRUE	FALSE	NA	X	Emvododstat	FALSE
EOC218	EPCAM	gain	EPCAM:NM_002354.3:exon3:c.210G>T:p.K70N	chr2:47373833G>T	nonsynonymous_SNV	NA	NA	TRUE	TRUE	FALSE	NA	TRUE	TRUE	TRUE	NA	X	Catumaxomab, Edrecolomab	TRUE
EOC218	FGR	gain	FGR:ENST00000374005:e.7_8del	chr1:27615844_27616857del	inframe_deletion	1	0	FALSE	FALSE	FALSE	NA	FALSE	TRUE	FALSE	NA	IVB	Dasatinib	FALSE
EOC218	HDAC2	gain	HDAC2:ENST00000519065:e.11_12del;HDAC2:ENST00000519065:e.10_11del	chr6:113943506_113944280del;chr6:113944410_113945362del	multiple	2	0	FALSE	FALSE	FALSE	NA	FALSE	TRUE	FALSE	NA	X	Belinostat, CUDC-101, Entinostat, Mocetinostat, Panobinostat, Vorinostat	FALSE
EOC218	IDH2	gain	IDH2:ENST00000330062:e.10_11del	chr15:90084353_90084816del	inframe_deletion	3	0	FALSE	FALSE	FALSE	NA	FALSE	TRUE	FALSE	NA	IIIB	Enasidenib, Vorasidenib	FALSE
EOC218	IMPDH2	gain	IMPDH2:ENST00000326739:e.10del	chr3:49025041_49025127del	inframe_deletion	1	0	FALSE	FALSE	FALSE	NA	FALSE	TRUE	FALSE	NA	X	Mycophenolate Mofetil	FALSE
EOC218	MKNK2	gain	MKNK2:ENST00000250896:e.8_9del;MKNK2:ENST00000250896:e.7_8del;MKNK2:ENST00000250896:e.9del	chr19:2042662_2042766del;chr19:2042870_2043124del;chr19:2042523_2042608del	multiple	1	NA	FALSE	FALSE	FALSE	NA	FALSE	TRUE	FALSE	NA	X	Tomivosertib	FALSE
EOC218	MS4A1	gain	MS4A1:ENST00000345732:e.6_7del;MS4A1:ENST00000345732:e.7_8del;MS4A1:ENST00000528313:e.3_4del	chr11:60466157_60466959del;chr11:60467060_60468250del	multiple	2	0	FALSE	FALSE	FALSE	NA	FALSE	TRUE	FALSE	NA	X	Obinutuzumab, Ocaratuzumab, Ofatumumab, Rituximab	FALSE
EOC218	NDUFA10	gain	NDUFA10:ENST00000419408:e.4::NOL4L:ENST00000621426:e.2	chr2:239899931::chr20:32566045	fusion	1	0	FALSE	FALSE	FALSE	NA	FALSE	TRUE	FALSE	NA	X	Metformin	FALSE
EOC218	NDUFA2	gain	NDUFA2:ENST00000252102:e.1del	chr5:140647363_140647484del	inframe_deletion	1	0	FALSE	FALSE	FALSE	NA	FALSE	TRUE	FALSE	NA	X	Metformin	FALSE
EOC218	NDUFAB1	gain	NDUFAB1:ENST00000007516:e.4del;NDUFAB1:ENST00000007516:e.3_4del	chr16:23581174_23582277del;chr16:23582375_23585336del	multiple	2	0	FALSE	FALSE	FALSE	NA	FALSE	TRUE	FALSE	NA	X	Metformin	FALSE
EOC218	NDUFC1	gain	NDUFC1:ENST00000394223:e.4_5del	chr4:139292609_139295043del	inframe_deletion	1	0	FALSE	FALSE	FALSE	NA	FALSE	TRUE	FALSE	NA	X	Metformin	FALSE
EOC218	NDUFS6	gain	NDUFS6:ENST00000274137:e.1del;NDUFS6:ENST00000274137:e.3del;NDUFS6:ENST00000274137:e.3_4del	chr5:1801548_1802320del;chr5:1802375_1814340del;chr5:1814461_1815851del	multiple	1	NA	FALSE	FALSE	FALSE	NA	FALSE	TRUE	FALSE	NA	X	Metformin	FALSE
EOC218	NDUFS7	gain	NDUFS7:ENST00000233627:e.4del;NDUFS7:ENST00000233627:e.5_6del	chr19:1388937_1390870del;chr19:1391050_1391119del	multiple	1	0	FALSE	FALSE	FALSE	NA	FALSE	TRUE	FALSE	NA	X	Metformin	FALSE
EOC218	NDUFV1	gain	NDUFV1:ENST00000322776:e.7del;NDUFV1:ENST00000322776:e.9del;NDUFV1:ENST00000322776:e.4del;NDUFV1:ENST00000533075:e.4del	chr11:67611568_67611896del;chr11:67611979_67612121del;chr11:67609634_67610380del	multiple	2	NA	FALSE	FALSE	FALSE	NA	FALSE	TRUE	FALSE	NA	X	Metformin	FALSE
EOC218	NF1	loss	NF1:NM_001042492.3:exon47:c.6985A>T:p.N2329Y	chr17:31340568A>T	nonsynonymous_SNV	NA	NA	FALSE	FALSE	FALSE	NA	FALSE	FALSE	NA	TRUE	X	Cobimetinib, Selumetinib, Trametinib	FALSE
EOC218	NF1	loss	NF1:ENST00000358273:e.32_36del	chr17:31257107_31275003del	frameshift_deletion	0	1	TRUE	TRUE	FALSE	NA	FALSE	TRUE	NA	TRUE	IIIA	Selumetinib	TRUE
EOC218	NTRK2	gain	intergenic::NTRK2:ENST00000277120:e.16	chr9:84934575::chr14:86936075	fusion_from_unknown	1	1	FALSE	FALSE	FALSE	NA	FALSE	TRUE	FALSE	NA	IC	Entrectinib, Larotrectinib, Repotrectinib	FALSE
EOC218	PSMA4	gain	PSMA4:ENST00000044462:e.7_8del	chr15:78545764_78546575del	inframe_deletion	2	0	FALSE	FALSE	FALSE	NA	FALSE	TRUE	FALSE	NA	X	Bortezomib, Ixazomib, Ixazomib Citrate, Marizomib, Oprozomib	FALSE
EOC218	PSMB2	gain	PSMB2:NM_002794.5:exon1:c.21C>G:p.I7M	chr1:35641412G>C	nonsynonymous_SNV	NA	NA	TRUE	TRUE	FALSE	NA	TRUE	TRUE	TRUE	NA	X	Bortezomib, Ixazomib, Ixazomib Citrate, Marizomib, Oprozomib	TRUE
EOC218	PSMB2	gain	PSMB2:ENST00000373237:e.3_4del;PSMB2:ENST00000373237:e.2_3del	chr1:35609408_35631274del;chr1:35631344_35636310del	multiple	2	0	FALSE	FALSE	FALSE	NA	FALSE	TRUE	FALSE	NA	X	Bortezomib, Ixazomib, Ixazomib Citrate, Marizomib, Oprozomib	FALSE
EOC218	PSMC5	gain	PSMC5:ENST00000310144:e.4_5del;PSMC5:ENST00000310144:e.6del	chr17:63829949_63830133del;chr17:63830191_63830273del	multiple	2	0	FALSE	FALSE	FALSE	NA	FALSE	TRUE	FALSE	NA	X	Bortezomib, Ixazomib, Ixazomib Citrate, Oprozomib	FALSE
EOC218	PSMD3	gain	PSMD3:ENST00000264639:e.3del;PSMD3:ENST00000264639:e.5del;PSMD3:ENST00000264639:e.7del;PSMD3:ENST00000264639:e.8_9del;PSMD3:ENST00000264639:e.9del	chr17:39986711_39988682del;chr17:39989928_39990093del;chr17:39990198_39994955del;chr17:39995295_39995424del;chr17:39995526_39996182del	multiple	1	NA	FALSE	FALSE	FALSE	NA	FALSE	TRUE	FALSE	NA	X	Bortezomib, Ixazomib, Ixazomib Citrate, Oprozomib	FALSE
EOC218	SMARCB1	loss	SMARCB1:ENST00000644036:e.6del	chr22:23816935_23825224del	frameshift_deletion	1	0	FALSE	FALSE	FALSE	NA	FALSE	TRUE	NA	FALSE	X	Tazemetostat	FALSE
EOC218	TP53	loss	TP53:NM_000546.6:exon5:c.403T>C:p.C135R	chr17:7675209A>G	nonsynonymous_SNV	NA	NA	TRUE	TRUE	FALSE	NA	FALSE	TRUE	NA	TRUE	IVA	Adavosertib	TRUE
EOC218	TXNRD1	gain	TXNRD1:ENST00000525566:e.11del	chr12:104321317_104325338del	inframe_deletion	2	0	FALSE	FALSE	FALSE	NA	FALSE	TRUE	FALSE	NA	IVB	Arsenic Trioxide	FALSE
EOC218	XPO1	gain	XPO1:ENST00000401558:e.13_14del	chr2:61492748_61492915del	inframe_deletion	2	0	FALSE	FALSE	FALSE	NA	FALSE	TRUE	FALSE	NA	X	Selinexor	FALSE
EOC219	ADRM1	gain	ADRM1:NM_007002.4:exon9:c.1033G>A:p.A345T	chr20:62308386G>A	nonsynonymous_SNV	NA	NA	FALSE	FALSE	FALSE	NA	TRUE	FALSE	FALSE	NA	X	Bortezomib, Ixazomib, Ixazomib Citrate, Oprozomib	FALSE
EOC219	AKT2	gain	AKT2:amp	NA	amplification	2-4	4-14	FALSE	FALSE	FALSE	NA	FALSE	TRUE	TRUE	NA	IVB	Capivasertib	TRUE
EOC219	BIRC2	gain	BIRC2:amp	NA	amplification	0-1	14-101	TRUE	FALSE	TRUE	NA	TRUE	TRUE	TRUE	NA	X	Birinapant	TRUE
EOC219	BIRC3	gain	BIRC3:amp	NA	amplification	0-1	14-101	TRUE	FALSE	TRUE	NA	TRUE	TRUE	TRUE	NA	X	Birinapant	TRUE
EOC219	CCND1	gain	CCND1:amp	NA	amplification	0-1	3-12	FALSE	FALSE	FALSE	NA	FALSE	FALSE	NA	NA	X	Palbociclib	FALSE
EOC219	CCNE1	gain	CCNE1:amp	NA	amplification	2-4	4-30	FALSE	FALSE	FALSE	NA	FALSE	TRUE	FALSE	NA	IVA	Lunresertib + Camonsertib	FALSE
EOC219	CHEK2	loss	CHEK2:ENST00000404276:e.8::ZNRF3:ENST00000544604:antisense	chr22:28702565::chr22:28899342	truncated_transcripts	6	2	FALSE	FALSE	FALSE	NA	FALSE	TRUE	NA	FALSE	IIIA	Olaparib, Talazoparib + Enzalutamide	FALSE
EOC219	MRE11	loss	MRE11:NM_005591.4:exon10:c.1052G>A:p.R351H	chr11:94467859C>T	nonsynonymous_SNV	NA	NA	FALSE	FALSE	FALSE	NA	FALSE	FALSE	NA	FALSE	X	Talazoparib	FALSE
EOC219	NDUFC2	gain	NDUFC2:amp	NA	amplification	0-1	3-12	FALSE	FALSE	TRUE	NA	FALSE	TRUE	TRUE	NA	X	Metformin	TRUE
EOC219	NDUFS8	gain	NDUFS8:amp	NA	amplification	0-1	3-12	FALSE	FALSE	FALSE	NA	FALSE	FALSE	NA	NA	X	Metformin	FALSE
EOC219	NDUFV1	gain	NDUFV1:amp	NA	amplification	0-1	3-12	FALSE	FALSE	FALSE	NA	FALSE	FALSE	NA	NA	X	Metformin	FALSE
EOC219	PSMC4	gain	PSMC4:amp	NA	amplification	2-4	4-14	TRUE	FALSE	FALSE	NA	FALSE	TRUE	TRUE	NA	X	Bortezomib, Ixazomib, Ixazomib Citrate, Oprozomib	TRUE
EOC219	PSMD8	gain	PSMD8:amp	NA	amplification	2-4	4-14	FALSE	FALSE	FALSE	NA	FALSE	TRUE	TRUE	NA	X	Bortezomib, Ixazomib, Ixazomib Citrate, Oprozomib	TRUE
EOC219	PTK2	gain	PTK2:amp	NA	amplification	1-3	3-10	FALSE	FALSE	TRUE	NA	FALSE	TRUE	TRUE	NA	X	Defactinib, GSK-2256098	TRUE
EOC219	TP53	loss	TP53:NM_000546.6:exon6:c.574C>T:p.Q192X|TP53:NM_000546.6:exon5:c.527G>A:p.C176Y	chr17:7674957G>A|chr17:7675085C>T	stopgain|nonsynonymous_SNV	NA	NA	TRUE	FALSE	FALSE	NA	FALSE	TRUE	NA	TRUE	IVA	Adavosertib	TRUE
EOC221	CCND1	gain	CCND1:amp	NA	amplification	2	20-27	FALSE	FALSE	FALSE	NA	TRUE	FALSE	NA	NA	X	Palbociclib	FALSE
EOC221	CCNE1	gain	CCNE1:amp	NA	amplification	0	8-9	FALSE	FALSE	FALSE	NA	FALSE	TRUE	TRUE	NA	IVA	Lunresertib + Camonsertib	TRUE
EOC221	EPHA4	gain	EPHA4:ENST00000281821:e.1_3del	chr2:221553016_221603225del	5prime_deletion	3	1	FALSE	FALSE	FALSE	NA	FALSE	TRUE	FALSE	NA	X	Vandetanib	FALSE
EOC221	ESR1	gain	ESR1:ENST00000206249:e.5_6del	chr6:151996508_152064619del	inframe_deletion	2	1	FALSE	FALSE	FALSE	NA	TRUE	TRUE	FALSE	NA	IIIB	Elacestrant	FALSE
EOC221	NBN	loss	NBN:ENST00000265433:e.1_9del	chr8:89958366_90027795del	5prime_deletion	4-5	1	FALSE	FALSE	FALSE	NA	FALSE	TRUE	NA	FALSE	IIIA	Talazoparib + Enzalutamide	FALSE
EOC221	NDUFC2	gain	NDUFC2:amp	NA	amplification	2	24-32	FALSE	TRUE	TRUE	NA	TRUE	TRUE	TRUE	NA	X	Metformin	TRUE
EOC221	TP53	loss	TP53:NM_000546.6:exon6:c.578A>G:p.H193R	chr17:7674953T>C	nonsynonymous_SNV	NA	NA	FALSE	TRUE	TRUE	NA	TRUE	TRUE	NA	TRUE	IVA	Adavosertib	TRUE
EOC222	ADRM1	gain	ADRM1:NM_007002.4:exon10:c.1171G>T:p.E391X	chr20:62308708G>T	stopgain	NA	NA	FALSE	FALSE	FALSE	NA	TRUE	FALSE	TRUE	NA	X	Bortezomib, Ixazomib, Ixazomib Citrate, Oprozomib	FALSE
EOC222	ALK	gain	VRK2:ENST00000340157:antisense::ALK:ENST00000389048:e.10	chr2:29284520::chr2:58004716	fusion_from_unknown	3	2	FALSE	FALSE	FALSE	NA	TRUE	TRUE	FALSE	NA	IIIA	Crizotinib, Alectinib, Brigatinib, Ceritinib, Lorlatinib	FALSE
EOC222	BRCA2	loss	BRCA2:NM_000059.4:exon24:c.9118-2A>G:NA;BRCA2:NM_000059.4:exon11:c.3734_3758del:p.N1246Rfs*5	chr13:32338088GAGAATATTAGTGAGGAAACTTCTGC>G	germline|somatic_frameshift_deletion	NA	NA	FALSE	FALSE	TRUE	NA	TRUE	TRUE	NA	TRUE	IA	Niraparib, Olaparib, Olaparib + Bevacizumab, Rucaparib	TRUE
EOC222	COL4A4	gain	COL4A4:NM_000092.5:exon29:c.2417A>G:p.K806R	chr2:227057567T>C	nonsynonymous_SNV	NA	NA	FALSE	FALSE	FALSE	NA	TRUE	FALSE	FALSE	NA	X	TRC-093	FALSE
EOC222	EPHA10	gain	EPHA10:NM_001099439.2:exon14:c.2472C>A:p.S824R	chr1:37719999G>T	nonsynonymous_SNV	NA	NA	FALSE	FALSE	TRUE	NA	TRUE	TRUE	TRUE	NA	IVB	Vandetanib	TRUE
EOC222	EPHB3	gain	EPHB3:amp	NA	amplification	1	10	FALSE	FALSE	FALSE	NA	TRUE	FALSE	NA	NA	X	Vandetanib	FALSE
EOC222	ERBB4	gain	ERBB4:ENST00000342788:e.18_25dup	chr2:211391962_211624044dup	inframe_duplication	2	1	FALSE	FALSE	FALSE	NA	TRUE	TRUE	FALSE	NA	IVB	Afatinib, Dacomitinib, Neratinib, Poziotinib, Vandetanib	FALSE
EOC222	HCK	gain	TM9SF4:ENST00000398022:e.1::HCK:ENST00000375852:e.2	chr20:32043627::chr20:32118842	fusion	4	1	FALSE	FALSE	FALSE	NA	TRUE	TRUE	FALSE	NA	IVB	Bosutinib, Dasatinib	FALSE
EOC222	HDAC2	gain	HDAC2:ENST00000519065:e.1::SLC22A3:ENST00000275300:e.6;SLC22A3:ENST00000275300:antisense::HDAC2:ENST00000519065:e.2;SLC22A3:ENST00000275300:e.5::HDAC2:ENST00000519065:e.2	chr6:113960134::chr6:160415235;chr6:113960297::chr6:160415108;chr6:113960120::chr6:160415191	multiple	2	NA	FALSE	FALSE	FALSE	NA	TRUE	TRUE	FALSE	NA	X	Belinostat, CUDC-101, Entinostat, Mocetinostat, Panobinostat, Vorinostat	FALSE
EOC222	HTR3C	gain	HTR3C:amp	NA	amplification	1	10	FALSE	FALSE	FALSE	NA	TRUE	FALSE	NA	NA	X	Ramosetron	FALSE
EOC222	HTR3D	gain	HTR3D:amp	NA	amplification	1	10	FALSE	FALSE	FALSE	NA	TRUE	FALSE	NA	NA	X	Ramosetron	FALSE
EOC222	HTR3E	gain	HTR3E:amp	NA	amplification	1	10	FALSE	FALSE	FALSE	NA	TRUE	FALSE	NA	NA	X	Ramosetron	FALSE
EOC222	IDH2	gain	IDH2:ENST00000330062:e.1::ZNF710:ENST00000268154:antisense	chr15:90080902::chr15:90098366	truncated_transcripts	4	1	FALSE	FALSE	FALSE	NA	TRUE	TRUE	FALSE	NA	X	Enasidenib, Vorasidenib	FALSE
EOC222	KLRC1	gain	KLRC1:amp	NA	amplification	2	6	FALSE	FALSE	FALSE	NA	TRUE	FALSE	NA	NA	X	Monalizumab	FALSE
EOC222	LYN	gain	LYN:amp	NA	amplification	2	7	FALSE	FALSE	FALSE	NA	TRUE	FALSE	NA	NA	X	Bosutinib, Dasatinib, ENMD-981693, Ilorasertib, JNJ-26483327	FALSE
EOC222	NDUFB5	gain	NDUFB5:amp	NA	amplification	1	10	FALSE	FALSE	FALSE	NA	TRUE	FALSE	NA	NA	X	Metformin	FALSE
EOC222	NDUFV2	gain	NDUFV2:ENST00000318388:e.1del	chr18:9084928_9116464del	5prime_deletion	1	2	FALSE	FALSE	FALSE	NA	TRUE	TRUE	FALSE	NA	X	Metformin	FALSE
EOC222	PIK3CA	gain	PIK3CA:amp	NA	amplification	1	10	FALSE	FALSE	FALSE	NA	TRUE	FALSE	NA	NA	X	Alpelisib, Apitolisib, BGT-226, Capivasertib, Dactolisib, Fulvestrant, Gedatolisib, Inavolisib, Omipalisib, Palbociclib, PF-04691502, Pictilisib, Pilaralisib, Serabelisib, SF-1126, Sonolisib, Voxtalisib	FALSE
EOC222	PSMD2	gain	PSMD2:amp	NA	amplification	1	10	FALSE	FALSE	TRUE	NA	TRUE	TRUE	TRUE	NA	X	Bortezomib, Ixazomib, Ixazomib Citrate, Oprozomib	TRUE
EOC222	TACR1	gain	intergenic::TACR1:ENST00000305249:e.3;TACR1:ENST00000305249:e.2::intergenic	chr2:66017069::chr2:75109377;chr2:71772715::chr2:75103138	balanced_translocation	2	2	FALSE	FALSE	FALSE	NA	TRUE	TRUE	FALSE	NA	X	Aprepitant, Fosaprepitant, Fosaprepitant Dimeglumine, Netupitant	FALSE
EOC222	TEK	gain	TEK:NM_000459.5:exon2:c.313C>T:p.R105X	chr9:27158091C>T	stopgain	NA	NA	FALSE	FALSE	FALSE	NA	TRUE	FALSE	FALSE	NA	X	Altiratinib, CEP-11981, Foretinib, Glesatinib, Regorafenib, Vandetanib	FALSE
EOC222	TP53	loss	TP53:NM_000546.6:exon6:c.641A>G:p.H214R	chr17:7674890T>C	nonsynonymous_SNV	NA	NA	FALSE	FALSE	TRUE	NA	TRUE	TRUE	NA	TRUE	IVA	Adavosertib	TRUE
EOC227	ATP4A	gain	ATP4A:amp	NA	amplification	2-3	3-5	FALSE	FALSE	FALSE	FALSE	FALSE	FALSE	NA	NA	X	Rabeprazole	FALSE
EOC227	IL1A	gain	IL1A:amp	NA	amplification	1	7-12	FALSE	FALSE	FALSE	TRUE	TRUE	FALSE	NA	NA	X	Bermekimab	FALSE
EOC227	NTRK2	gain	NTRK2:ENST00000277120:e.15::intergenic	chr9:84942137::chr9:85522778	truncated_transcripts	1	1	FALSE	FALSE	FALSE	FALSE	FALSE	TRUE	FALSE	NA	X	Altiratinib, Entrectinib, Larotrectinib, Larotrectinib Sulfate, Repotrectinib, Selitrectinib, Taletrectinib, Zurletrectinib	FALSE
EOC227	PSMA8	gain	PSMA8:amp	NA	amplification	0-1	4-7	FALSE	FALSE	FALSE	TRUE	FALSE	FALSE	NA	NA	X	Bortezomib, Ixazomib, Ixazomib Citrate, Marizomib, Oprozomib	FALSE
EOC227	PSMD8	gain	PSMD8:amp	NA	amplification	3	4-6	TRUE	FALSE	FALSE	TRUE	FALSE	TRUE	TRUE	NA	X	Bortezomib, Ixazomib, Ixazomib Citrate, Oprozomib	TRUE
EOC227	RET	gain	RET:amp	NA	amplification	1-2	3-6	FALSE	FALSE	FALSE	FALSE	FALSE	FALSE	NA	NA	X	Alectinib, Cabozantinib, Pralsetinib, Quizartinib, Regorafenib, Selpercatinib, Sorafenib, Sorafenib Tosylate, Sunitinib, Sunitinib Malate, Vandetanib	FALSE
EOC227	TP53	loss	TP53:NM_000546.6:exon6:c.586C>T:p.R196X	chr17:7674945G>A	stopgain	NA	NA	TRUE	FALSE	FALSE	TRUE	TRUE	TRUE	NA	TRUE	IVA	Adavosertib	TRUE
EOC23	PSMA8	gain	PSMA8:amp	NA	amplification	1	21	FALSE	FALSE	FALSE	NA	TRUE	FALSE	NA	NA	X	Bortezomib, Ixazomib, Ixazomib Citrate, Marizomib, Oprozomib	FALSE
EOC23	TP53	loss	TP53:NM_000546.6:exon7:c.722C>T:p.S241F	chr17:7674241G>A	nonsynonymous_SNV	NA	NA	FALSE	FALSE	TRUE	NA	TRUE	TRUE	NA	TRUE	IVA	Adavosertib	TRUE
EOC238	ADRA1D	gain	intergenic::ADRA1D:ENST00000379453:e.2	chr20:1865144::chr20:4231213	fusion_from_unknown	1	2-3	FALSE	FALSE	FALSE	NA	TRUE	TRUE	FALSE	NA	X	Carvedilol	FALSE
EOC238	EPHA5	gain	EPHA5:ENST00000613740:e.3::intergenic	chr4:65505875::chr6:86399242	truncated_transcripts	5	1-2	FALSE	FALSE	FALSE	NA	TRUE	TRUE	FALSE	NA	X	Vandetanib	FALSE
EOC238	ERBB4	gain	SLC45A1:ENST00000471889:e.4::ERBB4:ENST00000342788:e.20;intergenic::ERBB4:ENST00000342788:e.2	chr1:8326013::chr2:211577283;chr2:210878765::chr2:212447281	multiple	2-3	0-1	FALSE	FALSE	FALSE	NA	FALSE	TRUE	FALSE	NA	IVB	Afatinib, Dacomitinib, Neratinib, Poziotinib, Vandetanib	FALSE
EOC238	GRIN3A	gain	GRIN3A:NM_133445.3:exon8:c.2995C>T:p.R999C	chr9:101577781G>A	nonsynonymous_SNV	NA	NA	FALSE	FALSE	FALSE	NA	TRUE	FALSE	FALSE	NA	X	Memantine	FALSE
EOC238	HDAC9	gain	HDAC9:ENST00000686413:e.13_22del	chr7:18725034_18906899del	frameshift_deletion	1	1	FALSE	FALSE	FALSE	NA	TRUE	TRUE	FALSE	NA	X	Belinostat, CUDC-101, Entinostat, Panobinostat	FALSE
EOC238	HSP90AB1	gain	HSP90AB1:amp	NA	amplification	2	3-6	FALSE	FALSE	FALSE	NA	FALSE	TRUE	FALSE	NA	X	Retaspimycin, Retaspimycin Hydrochloride, SNX 5422, Tanespimycin	FALSE
EOC238	NDUFA7	gain	NDUFA7:amp	NA	amplification	3	6	TRUE	FALSE	TRUE	NA	TRUE	TRUE	TRUE	NA	X	Metformin	TRUE
EOC238	PCSK9	gain	ADGRL2:ENST00000686636:e.11::PCSK9:ENST00000302118:e.6	chr1:55054627::chr1:81961375	fusion	3	2	FALSE	FALSE	FALSE	NA	TRUE	TRUE	FALSE	NA	X	Ongericimab	FALSE
EOC238	TP53	loss	TP53:NM_000546.6:exon8:c.814G>C:p.V272L	chr17:7673806C>G	nonsynonymous_SNV	NA	NA	TRUE	TRUE	TRUE	NA	TRUE	TRUE	NA	TRUE	IVA	Adavosertib	TRUE
EOC238	VEGFA	gain	VEGFA:amp	NA	amplification	2	3-6	FALSE	FALSE	FALSE	NA	FALSE	FALSE	NA	NA	X	Bevacizumab	FALSE
EOC25	CCND1	gain	CCND1:amp	NA	amplification	2	6-8	FALSE	FALSE	FALSE	NA	FALSE	FALSE	NA	NA	X	Palbociclib	FALSE
EOC25	ESR1	gain	ESR1:ENST00000206249:antisense::ESR1:ENST00000206249:e.3;ESR1:ENST00000206249:antisense::ESR1:ENST00000206249:e.4	chr6:151872338::chr6:151921683	fusion_from_unknown	3	0	FALSE	FALSE	FALSE	NA	FALSE	TRUE	FALSE	NA	IIIB	Elacestrant	FALSE
EOC25	KDM6A	loss	intergenic::KDM6A:ENST00000611820:e.4	chr6:73678513::chrX:44963142	fusion_from_unknown	1	1	FALSE	FALSE	FALSE	NA	TRUE	TRUE	NA	FALSE	IVA	Tazemetostat	FALSE
EOC25	KIT	gain	KIT:NM_000222.3:exon19:c.2663G>A:p.R888Q	chr4:54736787G>A	nonsynonymous_SNV	NA	NA	FALSE	FALSE	FALSE	NA	TRUE	TRUE	FALSE	NA	IIIA	Imatinib, Regorafenib, Ripretinib, Sunitinib	FALSE
EOC25	NDUFA13	gain	NDUFA13:amp	NA	amplification	1	8	FALSE	FALSE	FALSE	NA	TRUE	FALSE	NA	NA	X	Metformin	FALSE
EOC25	NDUFC2	gain	NDUFC2:amp	NA	amplification	2	6-7	TRUE	FALSE	FALSE	NA	TRUE	TRUE	TRUE	NA	X	Metformin	TRUE
EOC25	NRG1	gain	intergenic::NRG1:ENST00000405005:e.2	chr8:31986823::chr18:26443670	multiple	0-1	3	FALSE	FALSE	FALSE	NA	TRUE	TRUE	FALSE	NA	II	Zenocutuzumab	FALSE
EOC25	PDE10A	gain	PDE10A:NM_001385079.1:exon1:c.314C>A:p.S105X	chr6:165662498G>T	stopgain	NA	NA	FALSE	FALSE	FALSE	NA	FALSE	FALSE	FALSE	NA	X	PBF-999	FALSE
EOC25	PSMA8	gain	PSMA8:amp	NA	amplification	2-3	18-20	FALSE	FALSE	FALSE	NA	TRUE	FALSE	NA	NA	X	Bortezomib, Ixazomib, Ixazomib Citrate, Marizomib, Oprozomib	FALSE
EOC25	TP53	loss	TP53:NM_000546.6:exon5:c.524G>A:p.R175H	chr17:7675088C>T	nonsynonymous_SNV	NA	NA	TRUE	TRUE	FALSE	NA	TRUE	TRUE	NA	TRUE	IVA	Adavosertib	TRUE
EOC252	CD47	gain	intergenic::CD47:ENST00000361309:e.9	chr3:107882091::chr3:108051938	fusion_from_unknown	2-4	1-2	FALSE	FALSE	FALSE	NA	TRUE	TRUE	FALSE	NA	X	Magrolimab	FALSE
EOC252	CSF1	gain	CSF1:amp	NA	amplification	1-2	1-6	FALSE	FALSE	FALSE	NA	FALSE	FALSE	NA	NA	X	PD-360324	FALSE
EOC252	ERBB3	gain	ERBB3:NM_001982.4:exon28:c.3904G>C:p.A1302P	chr12:56101930G>C	nonsynonymous_SNV	NA	NA	FALSE	FALSE	FALSE	NA	FALSE	FALSE	FALSE	NA	X	MM-121, Poziotinib, Sapitinib, Seribantumab, Vandetanib, Zenocutuzumab	FALSE
EOC252	MTOR	gain	MTOR:NM_004958.4:exon57:c.7567A>C:p.T2523P	chr1:11108248T>G	nonsynonymous_SNV	NA	NA	FALSE	FALSE	FALSE	NA	FALSE	FALSE	TRUE	NA	X	Apitolisib, AZD-8055, BGT-226, Dactolisib, Everolimus, Gedatolisib, Omipalisib, PF-04691502, Ridaforolimus, Sapanisertib, SF-1126, Temsirolimus, Vistusertib, Voxtalisib	FALSE
EOC252	NF1	loss	NF1:NM_001042492.3:exon18:c.2027dupC:p.I679Dfs*21	chr17:31226459A>AC	frameshift_insertion	NA	NA	TRUE	TRUE	FALSE	NA	TRUE	TRUE	NA	TRUE	IIIA	Selumetinib	TRUE
EOC252	PIK3R2	gain	PIK3R2:NM_005027.4:exon13:c.1669G>A:p.D557N	chr19:18167239G>A	nonsynonymous_SNV	NA	NA	TRUE	TRUE	FALSE	NA	TRUE	TRUE	TRUE	NA	X	Apitolisib, BGT-226, Dactolisib, Gedatolisib, Omipalisib, PF-04691502, Pictilisib, Pilaralisib, SF-1126, Sonolisib, Voxtalisib	TRUE
EOC252	PTK6	gain	PTK6:amp	NA	amplification	1-2	2-8	FALSE	FALSE	FALSE	NA	FALSE	FALSE	NA	NA	X	Vandetanib	FALSE
EOC252	SRC	gain	SRC:NM_198291.3:exon9:c.744dupC:p.T250Hfs*74	chr20:37397738G>GC	frameshift_insertion	NA	NA	FALSE	FALSE	FALSE	NA	FALSE	FALSE	FALSE	NA	X	Bosutinib, Dasatinib, Elzovantinib, ENMD-981693, Ilorasertib, JNJ-26483327, Saracatinib, Vandetanib	FALSE
EOC252	SRMS	gain	SRMS:amp	NA	amplification	1-2	2-8	FALSE	FALSE	FALSE	NA	FALSE	FALSE	NA	NA	X	Dasatinib, ENMD-981693, Ilorasertib	FALSE
EOC252	TP53	loss	TP53:NM_000546.6:exon7:c.743G>A:p.R248Q	chr17:7674220C>T	nonsynonymous_SNV	NA	NA	TRUE	TRUE	FALSE	NA	TRUE	TRUE	NA	TRUE	IVA	Adavosertib	TRUE
EOC256	BRCA2	loss	intergenic::BRCA2:ENST00000380152:e.19	chr6:85677297::chr13:32370132	fusion_from_unknown	3	1	FALSE	FALSE	FALSE	TRUE	FALSE	TRUE	NA	FALSE	IA	Niraparib, Olaparib, Olaparib + Bevacizumab, Rucaparib	FALSE
EOC256	CCDC6	gain	CCDC6:ENST00000263102:e.2::ANK3:ENST00000280772:e.42;CCDC6:ENST00000263102:e.2::ANK3:ENST00000502769:e.2	chr10:59840105::chr10:60058267	multiple	2-3	1	TRUE	TRUE	FALSE	TRUE	FALSE	TRUE	TRUE	NA	IVB	Pralsetinib, Selpercatinib	TRUE
EOC256	CCNE1	gain	CCNE1:amp	NA	amplification	2	14-15	TRUE	TRUE	FALSE	TRUE	TRUE	TRUE	TRUE	NA	IVA	Lunresertib + Camonsertib	TRUE
EOC256	CDK12	loss	SNCA:ENST00000394991:e.3::CDK12:ENST00000447079:e.6	chr4:89823584::chr17:39500390	fusion	2	2	FALSE	FALSE	FALSE	TRUE	FALSE	TRUE	NA	FALSE	IIIA	Olaparib, Talazoparib + Enzalutamide	FALSE
EOC256	EGFR	gain	EGFR:NM_005228.5:exon15:c.1831G>A:p.A611T	chr7:55165388G>A	nonsynonymous_SNV	NA	NA	FALSE	FALSE	FALSE	TRUE	TRUE	FALSE	TRUE	NA	X	AC-480, AEE-788, Afatinib, Amivantamab, Aumolertinib, BMS-690514, Brigatinib, Cetuximab, CLN-081, CUDC-101, Dacomitinib, Dacomitinib Anhydrous, Erlotinib, Erlotinib Hydrochloride, Gefitinib, JNJ-26483327, Lapatinib, Lazertinib, MP-412, Neratinib, Nimotuzumab, Osimertinib, Panitumumab, Poziotinib, Sapitinib, TAK-285, Tesevatinib, Theliatinib, Vandetanib, Varlitinib	FALSE
EOC256	FNTB	gain	FNTB:ENST00000246166:e.7::intergenic	chr2:113701226::chr14:65036748	truncated_transcripts	3	1-2	FALSE	FALSE	FALSE	TRUE	FALSE	TRUE	FALSE	NA	X	Tipifarnib	FALSE
EOC256	GRIN2A	gain	intergenic::GRIN2A:ENST00000330684:e.3	chr7:96846726::chr16:10153284	fusion_from_unknown	2	1	FALSE	FALSE	FALSE	TRUE	FALSE	TRUE	FALSE	NA	X	Memantine	FALSE
EOC256	KIF5B	gain	KIF5B:ENST00000302418:e.4::PLXDC2:ENST00000377252:e.2;GPR158:ENST00000376351:antisense::KIF5B:ENST00000302418:e.2	chr10:19886563::chr10:32039117;chr10:25599463::chr10:32058839	balanced_translocation	1-3	1-2	TRUE	TRUE	FALSE	TRUE	FALSE	TRUE	TRUE	NA	IVB	Pralsetinib, Selpercatinib	TRUE
EOC256	NDUFA9	gain	NDUFA9:amp	NA	amplification	3	4-6	TRUE	TRUE	FALSE	FALSE	FALSE	TRUE	TRUE	NA	X	Metformin	TRUE
EOC256	NOTCH1	gain	NOTCH1:ENST00000651671:e.2::intergenic	chr2:41922226::chr9:136532116	truncated_transcripts	2	4-5	FALSE	FALSE	FALSE	TRUE	TRUE	FALSE	TRUE	NA	X	Brontictuzumab	FALSE
EOC256	PTK2	gain	PTK2:amp	NA	amplification	0-1	5-8	FALSE	FALSE	FALSE	FALSE	FALSE	TRUE	TRUE	NA	X	Defactinib, GSK-2256098	TRUE
EOC256	PTK2	gain	PTK2:ENST00000696786:e.25::intergenic	chr8:140722593::chr8:141943619	truncated_transcripts	5	2	TRUE	TRUE	FALSE	TRUE	TRUE	TRUE	TRUE	NA	X	Defactinib, GSK-2256098	TRUE
EOC256	TP53	loss	TP53:NM_000546.6:exon5:c.469G>T:p.V157F	chr17:7675143C>A	nonsynonymous_SNV	NA	NA	TRUE	TRUE	FALSE	TRUE	TRUE	TRUE	NA	TRUE	IVA	Adavosertib	TRUE
EOC257	AR	gain	intergenic::AR:ENST00000374690:e.2	chr2:188094168::chrX:67609096	fusion_from_unknown	1	1	FALSE	FALSE	FALSE	FALSE	FALSE	TRUE	FALSE	NA	X	Abiraterone, Apalutamide, Darolutamide, Enzalutamide	FALSE
EOC257	ARAF	gain	intergenic::ARAF:ENST00000377045:e.15	chrX:47570858::chrX:103441099	fusion_from_unknown	1	1	FALSE	FALSE	FALSE	FALSE	FALSE	TRUE	FALSE	NA	IIIB	Cobimetinib, Trametinib, Sorafenib	FALSE
EOC257	BRCA1	loss	BRCA1:ENST00000357654:e.8::intergenic	chr17:34642029::chr17:43096908	truncated_transcripts	1	1-2	FALSE	FALSE	FALSE	TRUE	TRUE	TRUE	NA	FALSE	IA	Niraparib, Olaparib, Olaparib + Bevacizumab, Rucaparib	FALSE
EOC257	CD22	gain	CD22:NM_001771.4:exon7:c.1492G>A:p.A498T	chr19:35341123G>A	nonsynonymous_SNV	NA	NA	FALSE	FALSE	FALSE	TRUE	TRUE	FALSE	FALSE	NA	X	Epratuzumab	FALSE
EOC257	CSF1R	gain	CSF1R:NM_001288705.3:exon5:c.847G>T:p.V283L	chr5:150077318C>A	nonsynonymous_SNV	NA	NA	FALSE	FALSE	FALSE	TRUE	FALSE	FALSE	FALSE	NA	X	AMG-820, Cabiralizumab, Elzovantinib, Emactuzumab, ENMD-2076, Fexagratinib, Pazopanib, Quizartinib, Sunitinib, Sunitinib Malate, Vatalanib	FALSE
EOC257	EPHA5	gain	intergenic::EPHA5:ENST00000613740:e.6	chr4:63042044::chr4:65485114	fusion_from_unknown	2	1	FALSE	FALSE	FALSE	FALSE	FALSE	TRUE	FALSE	NA	IVB	Vandetanib	FALSE
EOC257	EPHB1	gain	TMPRSS15:ENST00000284885:antisense::EPHB1:ENST00000398015:e.4	chr3:134998698::chr21:18409376	fusion_from_unknown	2	1	FALSE	FALSE	FALSE	TRUE	TRUE	TRUE	FALSE	NA	IVB	Vandetanib	FALSE
EOC257	EPHB2	gain	EPHB2:ENST00000374630:e.1::intergenic	chr1:22411427::chr1:22752946	truncated_transcripts	2	1	FALSE	FALSE	FALSE	TRUE	TRUE	TRUE	FALSE	NA	X	Vandetanib	FALSE
EOC257	ERBB4	gain	intergenic::ERBB4:ENST00000342788:e.21;ERBB4:ENST00000342788:e.1::intergenic;intergenic::ERBB4:ENST00000342788:e.26	chr2:200485992::chr2:211446790;chr2:212318562::chrX:136282780;chr2:211410079::chrX:4758328	multiple	2	NA	FALSE	FALSE	FALSE	FALSE	FALSE	TRUE	FALSE	NA	IVB	Afatinib, Dacomitinib, Neratinib, Poziotinib, Vandetanib	FALSE
EOC257	FGFR3	gain	FGFR3:ENST00000440486:e.1_3del	chr4:1785187_1799542del	5prime_deletion	3	1	FALSE	FALSE	FALSE	FALSE	FALSE	TRUE	FALSE	NA	X	AZD-4547, Brivanib, Brivanib Alaninate, Dovitinib, ENMD-2076, ENMD-981693, Erdafitinib, Fexagratinib, Futibatinib, Infigratinib, Pazopanib, Pemigatinib, Rogaratinib, XL-999	FALSE
EOC257	GRIN2A	gain	GRIN2A:NM_001134407.3:exon13:c.3891C>A:p.D1297E	chr16:9763653G>T	nonsynonymous_SNV	NA	NA	FALSE	FALSE	FALSE	TRUE	FALSE	FALSE	TRUE	NA	X	Memantine	FALSE
EOC257	HDAC4	gain	intergenic::HDAC4:ENST00000543185:e.3	chr2:239270433::chrX:44396330	fusion_from_unknown	1	1	FALSE	FALSE	FALSE	FALSE	FALSE	TRUE	FALSE	NA	X	Belinostat, CUDC-101, Entinostat, Panobinostat	FALSE
EOC257	PSMD2	gain	PSMD2:ENST00000310118:e.16::ABCC5:ENST00000334444:antisense	chr3:183935966::chr3:184306944	truncated_transcripts	4	1	FALSE	FALSE	FALSE	TRUE	FALSE	TRUE	FALSE	NA	X	Bortezomib, Ixazomib, Ixazomib Citrate, Oprozomib	FALSE
EOC257	PTEN	loss	PTEN:NM_000314.8:exon9:c.1031A>T:p.K344M	chr10:87965291A>T	nonsynonymous_SNV	NA	NA	FALSE	FALSE	FALSE	TRUE	FALSE	TRUE	NA	FALSE	IIIA	Capivasertib + Fulvestrant	FALSE
EOC257	TP53	loss	TP53:NM_000546.6:exon8:c.844C>G:p.R282G	chr17:7673776G>C	nonsynonymous_SNV	NA	NA	FALSE	TRUE	TRUE	TRUE	TRUE	TRUE	NA	TRUE	IVA	Adavosertib	TRUE
EOC26	ALK	gain	SLC1A6:ENST00000430939:e.1::ALK:ENST00000389048:e.5	chr2:29420047::chr19:14988064	fusion	2	6	FALSE	FALSE	FALSE	FALSE	FALSE	TRUE	FALSE	NA	IIIA	Crizotinib, Alectinib, Brigatinib, Ceritinib, Lorlatinib	FALSE
EOC26	ATP4A	gain	ATP4A:amp	NA	amplification	2-3	3-8	FALSE	FALSE	FALSE	FALSE	FALSE	FALSE	NA	NA	X	Rabeprazole	FALSE
EOC26	CCNE1	gain	CCNE1:amp	NA	amplification	2-3	3-10	FALSE	FALSE	FALSE	FALSE	FALSE	TRUE	FALSE	NA	IVA	Lunresertib + Camonsertib	FALSE
EOC26	CD22	gain	CD22:amp	NA	amplification	2-3	3-8	FALSE	TRUE	FALSE	FALSE	FALSE	TRUE	TRUE	NA	X	Epratuzumab	TRUE
EOC26	CD22	gain	CD22:ENST00000085219:e.3del	chr19:35332923_35336035del	inframe_deletion	9	0	FALSE	FALSE	FALSE	FALSE	FALSE	TRUE	FALSE	NA	X	Epratuzumab	FALSE
EOC26	CD74	gain	CD74:ENST00000009530:e.8del;CD74:ENST00000009530:e.6_7del;CD74:ENST00000009530:e.6del;CD74:ENST00000009530:e.4del;CD74:ENST00000009530:e.3_4del;CD74:ENST00000009530:e.2_3del;CD74:ENST00000009530:e.1del	chr5:150402252_150402565del;chr5:150402626_150404681del;chr5:150404766_150405084del;chr5:150405181_150406260del;chr5:150406321_150406881del;chr5:150406960_150407152del;chr5:150407325_150412626del	multiple	2	NA	FALSE	FALSE	FALSE	FALSE	FALSE	TRUE	FALSE	NA	IVB	Repotrectinib	FALSE
EOC26	DDB1	gain	DDB1:ENST00000301764:e.3del	chr11:61329585_61329959del	multiple	3	0	FALSE	FALSE	FALSE	FALSE	FALSE	TRUE	FALSE	NA	X	Lenalidomide, Thalidomide	FALSE
EOC26	DHODH	gain	ATP5F1A:ENST00000398752:antisense::DHODH:ENST00000219240:e.2	chr16:72006027::chr18:46088237;chr16:72006384::chr18:46089996	multiple	2	5	FALSE	FALSE	FALSE	FALSE	FALSE	TRUE	FALSE	NA	X	Emvododstat	FALSE
EOC26	EPHB3	gain	EPHB3:amp	NA	amplification	2	2-32	FALSE	FALSE	FALSE	FALSE	FALSE	FALSE	NA	NA	X	Vandetanib	FALSE
EOC26	EPHB3	gain	LMNTD1:ENST00000543629:e.4::EPHB3:ENST00000330394:e.10	chr3:184579111::chr12:25431956	fusion	33	0	FALSE	FALSE	FALSE	FALSE	FALSE	TRUE	FALSE	NA	IVB	Vandetanib	FALSE
EOC26	ESR1	gain	ESR1:ENST00000206249:e.1::intergenic	chr6:151835283::chr21:22945313	truncated_transcripts	3	0	FALSE	FALSE	FALSE	TRUE	FALSE	TRUE	FALSE	NA	X	Elacestrant, Fulvestrant	FALSE
EOC26	GRIN1	gain	GRIN1:ENST00000371561:e.6del	chr9:137157036_137158378del	frameshift_deletion	3	1	FALSE	FALSE	FALSE	FALSE	FALSE	TRUE	FALSE	NA	X	Memantine	FALSE
EOC26	GRIN2B	gain	GRIN2B:amp	NA	amplification	2	6-12	FALSE	FALSE	FALSE	TRUE	FALSE	FALSE	NA	NA	X	Memantine	FALSE
EOC26	HDAC2	gain	HDAC2:ENST00000519065:e.13_14del;HDAC2:ENST00000519065:e.12del;HDAC2:ENST00000519065:e.10_11del;HDAC2:ENST00000519065:e.9_10del	chr6:113941088_113941708del;chr6:113941766_113943352del;chr6:113944410_113945362del;chr6:113945470_113946008del	multiple	2	NA	FALSE	FALSE	FALSE	FALSE	FALSE	TRUE	FALSE	NA	X	Belinostat, CUDC-101, Entinostat, Mocetinostat, Panobinostat, Vorinostat	FALSE
EOC26	HDAC3	gain	HDAC3:ENST00000305264:e.5_6del	chr5:141629739_141629860del	frameshift_deletion	3	0	FALSE	FALSE	FALSE	FALSE	FALSE	TRUE	FALSE	NA	X	Belinostat, CUDC-101, Entinostat, Mocetinostat, Panobinostat, Vorinostat	FALSE
EOC26	HDAC7	gain	HDAC7:amp	NA	amplification	2	10-13	FALSE	FALSE	FALSE	TRUE	TRUE	FALSE	NA	NA	X	Belinostat, CUDC-101, Entinostat, Panobinostat	FALSE
EOC26	HTR3C	gain	HTR3C:ENST00000318351:e.9::intergenic	chr1:168994048::chr3:184060257	truncated_transcripts	31	0	FALSE	FALSE	FALSE	FALSE	FALSE	TRUE	FALSE	NA	X	Ramosetron	FALSE
EOC26	HTR3C	gain	HTR3C:amp	NA	amplification	2	2-32	FALSE	FALSE	FALSE	FALSE	FALSE	FALSE	NA	NA	X	Ramosetron	FALSE
EOC26	HTR3D	gain	YEATS2:ENST00000305135:e.1::HTR3D:ENST00000428798:e.2	chr3:183701868::chr3:184024517	fusion	31	0	FALSE	FALSE	FALSE	FALSE	FALSE	TRUE	FALSE	NA	X	Ramosetron	FALSE
EOC26	HTR3D	gain	HTR3D:amp	NA	amplification	2	2-32	FALSE	FALSE	FALSE	FALSE	FALSE	FALSE	NA	NA	X	Ramosetron	FALSE
EOC26	HTR3E	gain	HTR3E:amp	NA	amplification	2	2-32	FALSE	FALSE	FALSE	FALSE	FALSE	FALSE	NA	NA	X	Ramosetron	FALSE
EOC26	IDH2	gain	IDH2:ENST00000330062:e.1_2del	chr15:90091644_90102276del	inframe_deletion	4	0	FALSE	FALSE	FALSE	FALSE	FALSE	TRUE	FALSE	NA	IIIB	Enasidenib, Vorasidenib	FALSE
EOC26	IL1A	gain	IL1A:amp	NA	amplification	2	6-10	FALSE	FALSE	FALSE	TRUE	FALSE	FALSE	NA	NA	X	Bermekimab	FALSE
EOC26	IRAK4	gain	IRAK4:amp	NA	amplification	2	21-25	TRUE	TRUE	TRUE	TRUE	TRUE	TRUE	TRUE	NA	IVB	Emavusertib	TRUE
EOC26	JAK1	gain	JAK1:ENST00000342505:e.15_16del	chr1:64844889_64845513del	inframe_deletion	4	0	FALSE	FALSE	FALSE	FALSE	FALSE	TRUE	FALSE	NA	IVB	Ruxolitinib	FALSE
EOC26	KLRC1	gain	KLRC1:amp	NA	amplification	2	6-12	FALSE	FALSE	FALSE	TRUE	FALSE	FALSE	NA	NA	X	Monalizumab	FALSE
EOC26	KRAS	gain	KRAS:ENST00000311936:e.4::KRAS:ENST00000311936:antisense;intergenic::KRAS:ENST00000311936:e.3;KRAS:ENST00000311936:antisense::KRAS:ENST00000311936:e.5;ZNF827:ENST00000508784:e.8::KRAS:ENST00000311936:e.5	chr12:25217300::chr12:25344430;chr12:25242767::chr12:25388134;chr12:25214880::chr12:25328853;chr4:145808138::chr12:25220675	multiple	39-252	5-9	TRUE	TRUE	TRUE	TRUE	FALSE	TRUE	TRUE	NA	IIIB	Adagrasib + Cetuximab, Adagrasib, Sotorasib, Adagrasib + Panitumumab, Sotorasib + Cetuximab, Sotorasib + Panitumumab, Cobimetinib, Trametinib, Cetuximab, Cetuximab + Chemotherapy, Panitumumab, Panitumumab + Chemotherapy	TRUE
EOC26	KRAS	gain	KRAS:amp	NA	amplification	2	47-154	TRUE	TRUE	TRUE	TRUE	TRUE	TRUE	TRUE	NA	IVB	Adagrasib, Sotorasib	TRUE
EOC26	LAG3	gain	LAG3:amp	NA	amplification	2	6-12	FALSE	FALSE	FALSE	TRUE	FALSE	FALSE	NA	NA	X	Fianlimab, Relatlimab	FALSE
EOC26	LYN	gain	LYN:amp	NA	amplification	1-2	6-13	FALSE	FALSE	FALSE	TRUE	FALSE	FALSE	NA	NA	X	Bosutinib, Dasatinib, ENMD-981693, Ilorasertib, JNJ-26483327	FALSE
EOC26	MKNK2	gain	MKNK2:ENST00000250896:e.10_11del	chr19:2042034_2042427del	inframe_deletion	2	0	FALSE	FALSE	FALSE	FALSE	FALSE	TRUE	FALSE	NA	X	Tomivosertib	FALSE
EOC26	NAE1	gain	NAE1:ENST00000290810:e.16del	chr16:66809074_66810373del	inframe_deletion	2	0	FALSE	FALSE	FALSE	FALSE	FALSE	TRUE	FALSE	NA	X	Pevonedistat	FALSE
EOC26	NDUFA13	gain	NDUFA13:amp	NA	amplification	3-4	3-8	FALSE	FALSE	FALSE	FALSE	FALSE	FALSE	NA	NA	X	Metformin	FALSE
EOC26	NDUFA13	gain	NDUFA13:ENST00000507754:e.2del;NDUFA13:ENST00000507754:e.3del	chr19:19526259_19527280del;chr19:19527351_19527700del	multiple	6-10	1	FALSE	FALSE	FALSE	FALSE	FALSE	TRUE	FALSE	NA	X	Metformin	FALSE
EOC26	NDUFA9	gain	NDUFA9:amp	NA	amplification	2	6-12	TRUE	TRUE	TRUE	TRUE	FALSE	TRUE	TRUE	NA	X	Metformin	TRUE
EOC26	NDUFB2	gain	NDUFB2:ENST00000247866:e.1_2del	chr7:140696842_140702866del	inframe_deletion	4	0	FALSE	FALSE	FALSE	FALSE	FALSE	TRUE	FALSE	NA	X	Metformin	FALSE
EOC26	NDUFB7	gain	intergenic::NDUFB7:ENST00000215565:e.2;PRODH2:ENST00000653904:e.9::NDUFB7:ENST00000215565:e.2;PRODH2:ENST00000653904:e.9::NDUFB7:ENST00000215565:e.2;PRODH2:ENST00000588266:e.3::NDUFB7:ENST00000215565:e.2	chr19:14018104::chr19:14581084;chr19:14573740::chr19:35800298;chr19:14573706::chr19:35800267	multiple	21	NA	FALSE	FALSE	FALSE	FALSE	FALSE	TRUE	FALSE	NA	X	Metformin	FALSE
EOC26	NDUFB7	gain	NDUFB7:amp	NA	amplification	3-4	6-24	TRUE	TRUE	TRUE	TRUE	FALSE	TRUE	TRUE	NA	X	Metformin	TRUE
EOC26	NDUFS2	gain	NDUFS2:ENST00000676972:e.12_13del;NDUFS2:ENST00000676972:e.13_14del	chr1:161213732_161213864del;chr1:161213921_161214156del	multiple	4	0	FALSE	FALSE	FALSE	FALSE	FALSE	TRUE	FALSE	NA	X	Metformin	FALSE
EOC26	NDUFS6	gain	NDUFS6:amp	NA	amplification	2	4-11	FALSE	TRUE	TRUE	TRUE	FALSE	TRUE	TRUE	NA	X	Metformin	TRUE
EOC26	NDUFV1	gain	NDUFV1:ENST00000322776:e.4del;NDUFV1:ENST00000322776:e.7del	chr11:67609634_67610380del;chr11:67611568_67611896del	multiple	3	1	FALSE	FALSE	FALSE	FALSE	FALSE	TRUE	FALSE	NA	X	Metformin	FALSE
EOC26	NF1	loss	NF1:ENST00000358273:e.48del	chr17:31343134_31349119del	frameshift_deletion	1	2	FALSE	FALSE	FALSE	FALSE	FALSE	TRUE	NA	FALSE	IIIA	Selumetinib	FALSE
EOC26	NRG1	gain	intergenic::NRG1:ENST00000405005:e.2	chr8:31296367::chr8:31748028	fusion_from_unknown	0-2	0-5	FALSE	FALSE	FALSE	TRUE	TRUE	TRUE	FALSE	NA	II	Zenocutuzumab	FALSE
EOC26	NTRK2	gain	NTRK2:ENST00000277120:e.4_5del;NTRK2:ENST00000277120:e.5_6del;NTRK2:ENST00000277120:e.7del	chr9:84702419_84707844del;chr9:84707912_84710637del;chr9:84723708_84724223del	multiple	2	NA	FALSE	FALSE	FALSE	FALSE	FALSE	TRUE	FALSE	NA	IC	Entrectinib, Larotrectinib, Repotrectinib	FALSE
EOC26	PARP1	gain	PARP1:ENST00000366794:e.8del;PARP1:ENST00000366794:e.7_8del	chr1:226381209_226383037del;chr1:226383183_226385504del	multiple	3	1	FALSE	FALSE	FALSE	FALSE	FALSE	TRUE	FALSE	NA	IVB	Niraparib, Olaparib, Rucaparib, Talazoparib	FALSE
EOC26	PARP2	gain	PARP2:ENST00000429687:e.6_7del	chr14:20351122_20352245del	frameshift_deletion	3	0	FALSE	FALSE	FALSE	FALSE	FALSE	TRUE	FALSE	NA	X	Niraparib, Olaparib, Pamiparib, Rucaparib, Senaparib, Talazoparib, Veliparib	FALSE
EOC26	PDE4C	gain	PDE4C:amp	NA	amplification	3-4	3-8	FALSE	FALSE	FALSE	FALSE	FALSE	FALSE	NA	NA	X	Roflumilast	FALSE
EOC26	PIK3R2	gain	PIK3R2:amp	NA	amplification	3-4	3-8	FALSE	FALSE	FALSE	FALSE	FALSE	TRUE	FALSE	NA	X	Apitolisib, BGT-226, Dactolisib, Gedatolisib, Omipalisib, PF-04691502, Pictilisib, Pilaralisib, SF-1126, Sonolisib, Voxtalisib	FALSE
EOC26	PLK4	gain	PLK4:NM_014264.5:exon5:c.444G>T:p.M148I	chr4:127885814G>T	nonsynonymous_SNV	NA	NA	TRUE	TRUE	TRUE	TRUE	TRUE	TRUE	TRUE	NA	X	CFI-400945, Ocifisertib	TRUE
EOC26	PPP2R1A	loss	PPP2R1A:ENST00000322088:e.1del;PPP2R1A:ENST00000322088:e.2del;PPP2R1A:ENST00000322088:e.10_11del;PPP2R1A:ENST00000322088:e.11del	chr19:52190173_52201943del;chr19:52202032_52205961del;chr19:52219864_52220189del;chr19:52220248_52220978del	multiple	5	1	FALSE	FALSE	FALSE	FALSE	FALSE	TRUE	NA	FALSE	IVA	Lunresertib + Camonsertib	FALSE
EOC26	PPP5C	gain	PPP5C:ENST00000012443:e.1del	chr19:46347216_46353747del	inframe_deletion	6	0	FALSE	FALSE	FALSE	FALSE	FALSE	TRUE	FALSE	NA	X	LB-100	FALSE
EOC26	PSMA1	gain	PSMA1:ENST00000396394:e.8del	chr11:14507767_14510873del;chr11:14510949_14513568del	multiple	3	1	FALSE	FALSE	FALSE	FALSE	FALSE	TRUE	FALSE	NA	X	Bortezomib, Ixazomib, Ixazomib Citrate, Marizomib, Oprozomib	FALSE
EOC26	PSMA7	gain	PSMA7:ENST00000370873:e.2del;PSMA7:ENST00000370873:e.3del;PSMA7:ENST00000442551:e.1del	chr20:62139907_62140820del;chr20:62139198_62139782del	multiple	4	1	FALSE	FALSE	FALSE	FALSE	FALSE	TRUE	FALSE	NA	X	Bortezomib, Ixazomib, Ixazomib Citrate, Marizomib, Oprozomib	FALSE
EOC26	PSMB2	gain	PSMB2:ENST00000373237:e.3_4del;PSMB2:ENST00000373237:e.2_3del;PSMB2:ENST00000373237:e.1_2del	chr1:35609408_35631274del;chr1:35631344_35636310del;chr1:35636432_35641342del	multiple	4	NA	FALSE	FALSE	FALSE	FALSE	FALSE	TRUE	FALSE	NA	X	Bortezomib, Ixazomib, Ixazomib Citrate, Marizomib, Oprozomib	FALSE
EOC26	PSMB6	gain	PSMB6:ENST00000270586:e.1del	chr17:4796295_4796727del	inframe_deletion	2	0	FALSE	FALSE	FALSE	FALSE	FALSE	TRUE	FALSE	NA	X	Bortezomib, Ixazomib, Ixazomib Citrate, Marizomib, Oprozomib	FALSE
EOC26	PSMB7	gain	PSMB7:ENST00000259457:e.6_7del;PSMB7:ENST00000259457:e.6del;PSMB7:ENST00000259457:e.4_5del;PSMB7:ENST00000259457:e.3_4del	chr9:124356915_124384598del;chr9:124384655_124405316del;chr9:124405432_124412352del;chr9:124412492_124413908del	multiple	3	NA	FALSE	FALSE	FALSE	FALSE	FALSE	TRUE	FALSE	NA	X	Bortezomib, Ixazomib, Ixazomib Citrate, Marizomib, Oprozomib	FALSE
EOC26	PTK2	gain	PTK2:ENST00000696786:e.20del;PTK2:ENST00000696786:e.17_19del	chr8:140752315_140761164del;chr8:140761262_140764234del	multiple	3	1	FALSE	FALSE	FALSE	FALSE	FALSE	TRUE	FALSE	NA	X	Defactinib, GSK-2256098	FALSE
EOC26	SF3B1	gain	SF3B1:ENST00000335508:e.12del;SF3B1:ENST00000335508:e.11_12del	chr2:197403036_197403586del;chr2:197403764_197405076del	multiple	3	1	FALSE	FALSE	FALSE	FALSE	FALSE	TRUE	FALSE	NA	X	Ceralasertib, Emavusertib	FALSE
EOC26	SRD5A1	gain	SRD5A1:amp	NA	amplification	2	4-11	FALSE	FALSE	FALSE	TRUE	FALSE	TRUE	TRUE	NA	X	Abiraterone	TRUE
EOC26	TP53	loss	TP53:NM_000546.6:exon8:c.856G>A:p.E286K	chr17:7673764C>T	nonsynonymous_SNV	NA	NA	TRUE	TRUE	TRUE	TRUE	TRUE	TRUE	NA	TRUE	IVA	Adavosertib	TRUE
EOC26	XPO1	gain	XPO1:ENST00000401558:e.9del;XPO1:ENST00000401558:e.8_9del;XPO1:ENST00000401558:e.7del	chr2:61497008_61498674del;chr2:61498792_61498865del;chr2:61498914_61499714del	multiple	3-4	NA	FALSE	FALSE	FALSE	FALSE	FALSE	TRUE	FALSE	NA	X	Selinexor	FALSE
EOC264	ALK	gain	DTNB:ENST00000406818:e.8::ALK:ENST00000389048:e.5	chr2:25561940::chr2:29523665	fusion	5	2	FALSE	FALSE	FALSE	NA	TRUE	TRUE	FALSE	NA	IIIA	Crizotinib, Alectinib, Brigatinib, Ceritinib, Lorlatinib	FALSE
EOC264	EPHB1	gain	MKKS:ENST00000347364:e.1::EPHB1:ENST00000398015:e.4	chr3:135085049::chr20:10430053	fusion	3	2	FALSE	FALSE	FALSE	NA	TRUE	TRUE	FALSE	NA	IVB	Vandetanib	FALSE
EOC264	EPHB4	gain	EPHB4:NM_004444.5:exon10:c.1712A>C:p.E571A	chr7:100813696T>G	nonsynonymous_SNV	NA	NA	FALSE	FALSE	FALSE	NA	TRUE	FALSE	TRUE	NA	X	Tesevatinib, Vandetanib	FALSE
EOC264	ESR2	gain	ESR2:ENST00000341099:e.2::FUT8:ENST00000673929:antisense	chr14:64281444::chr14:65520149	truncated_transcripts	2	1	FALSE	FALSE	FALSE	NA	TRUE	FALSE	FALSE	NA	X	Fulvestrant	FALSE
EOC264	FN1	gain	FN1:ENST00000354785:e.19::MREG:ENST00000263268:e.2	chr2:215406077::chr2:216008762	fusion	4	1	FALSE	FALSE	FALSE	NA	TRUE	TRUE	FALSE	NA	X	L19SIP 131I	FALSE
EOC264	GRIN2B	gain	GRIN2B:ENST00000609686:e.4::intergenic	chr12:13739056::chr12:14287860	truncated_transcripts	6	2	FALSE	FALSE	FALSE	NA	TRUE	TRUE	FALSE	NA	X	Memantine	FALSE
EOC264	NDUFB9	gain	NDUFB9:NM_005005.3:exon2:c.220C>T:p.R74C	chr8:124543205C>T	nonsynonymous_SNV	NA	NA	FALSE	FALSE	FALSE	NA	TRUE	FALSE	FALSE	NA	X	Metformin	FALSE
EOC264	PDE4C	gain	PDE4C:ENST00000594617:e.2::PIK3R2:ENST00000222254:e.13	chr19:18166945::chr19:18226814	fusion	5	3	FALSE	FALSE	FALSE	NA	TRUE	TRUE	FALSE	NA	X	Roflumilast	FALSE
EOC264	PLK4	gain	ABHD18:ENST00000645843:e.8::PLK4:ENST00000270861:e.10	chr4:127891773::chr4:128018479	fusion	2	2	FALSE	FALSE	FALSE	NA	TRUE	TRUE	FALSE	NA	X	CFI-400945, Ocifisertib	FALSE
EOC264	PPP5C	gain	PPP5C:ENST00000012443:e.4::intergenic	chr19:31091554::chr19:46377333	truncated_transcripts	3	1	FALSE	FALSE	FALSE	NA	TRUE	TRUE	FALSE	NA	X	LB-100	FALSE
EOC264	ROS1	gain	ROS1:ENST00000368507:e.12::intergenic;intergenic::ROS1:ENST00000368507:e.17	chr6:117162804::chr6:117392089;chr6:117162719::chr6:117383393	balanced_translocation	2	1	FALSE	FALSE	FALSE	NA	TRUE	TRUE	FALSE	NA	IIIA	Crizotinib, Entrectinib, Repotrectinib, Ceritinib, Lorlatinib	FALSE
EOC264	TP53	loss	TP53:NM_000546.6:exon6:c.646G>A:p.V216M	chr17:7674885C>T	nonsynonymous_SNV	NA	NA	FALSE	TRUE	FALSE	NA	TRUE	TRUE	NA	TRUE	IVA	Adavosertib	TRUE
EOC268	ADRB3	gain	ADRB3:amp	NA	amplification	1	8-9	FALSE	FALSE	FALSE	NA	TRUE	FALSE	NA	NA	X	Carvedilol	FALSE
EOC268	ARID1A	loss	ARID1A:ENST00000324856:e.4::intergenic	chr1:26759229::chr1:27657458	truncated_transcripts	2	1	FALSE	FALSE	FALSE	NA	TRUE	TRUE	NA	FALSE	IVA	PLX2853, Tazemetostat	FALSE
EOC268	ATR	loss	ATR:NM_001184.4:exon33:c.5711G>A:p.R1904Q	chr3:142497040C>T	nonsynonymous_SNV	NA	NA	FALSE	FALSE	FALSE	NA	TRUE	TRUE	NA	FALSE	IIIA	Talazoparib + Enzalutamide	FALSE
EOC268	ENG	gain	ENG:NM_001114753.3:exon7:c.926G>A:p.S309N	chr9:127824865C>T	nonsynonymous_SNV	NA	NA	FALSE	FALSE	FALSE	NA	FALSE	TRUE	FALSE	NA	X	Carotuximab	FALSE
EOC268	ESR1	gain	ESR1:ENST00000427531:e.6::SYNE1:ENST00000367255:e.129	chr6:152109771::chr6:152184988	fusion	2	0	FALSE	FALSE	FALSE	NA	FALSE	TRUE	FALSE	NA	IIIB	Elacestrant	FALSE
EOC268	FGFR1	gain	FGFR1:amp	NA	amplification	1	8-9	FALSE	FALSE	FALSE	NA	TRUE	FALSE	NA	NA	X	AZD-4547, Brivanib, Brivanib Alaninate, ENMD-981693, Erdafitinib, Fexagratinib, Futibatinib, Infigratinib, Lucitanib, Pazopanib, Pemigatinib, Regorafenib, Rogaratinib, XL-999	FALSE
EOC268	IDO1	gain	IDO1:amp	NA	amplification	1	8-9	FALSE	FALSE	FALSE	NA	TRUE	FALSE	NA	NA	X	Linrodostat	FALSE
EOC268	PARP1	gain	PARP1:amp	NA	amplification	1	6-7	FALSE	TRUE	FALSE	NA	FALSE	TRUE	TRUE	NA	IVB	Niraparib, Olaparib, Rucaparib, Talazoparib	TRUE
EOC268	TP53	loss	TP53:NM_000546.6:exon8:c.832C>T:p.P278S	chr17:7673788G>A	nonsynonymous_SNV	NA	NA	FALSE	TRUE	FALSE	NA	TRUE	TRUE	NA	TRUE	IVA	Adavosertib	TRUE
EOC270	PSMD8	gain	PSMD8:ENST00000215071:e.1::HCN2:ENST00000251287:e.2	chr19:603163::chr19:38375798;chr19:603241::chr19:38375798	multiple	1	1	FALSE	FALSE	FALSE	NA	FALSE	TRUE	FALSE	NA	X	Bortezomib, Ixazomib, Ixazomib Citrate, Oprozomib	FALSE
EOC270	TNC	gain	TNC:NM_002160.4:exon22:c.5746G>A:p.G1916S	chr9:115035245C>T	nonsynonymous_SNV	NA	NA	FALSE	FALSE	FALSE	NA	TRUE	TRUE	FALSE	NA	X	F16SIP 131I	FALSE
EOC270	TP53	loss	TP53:NM_000546.6:exon6:c.637C>T:p.R213X	chr17:7674894G>A	stopgain	NA	NA	TRUE	FALSE	TRUE	NA	TRUE	TRUE	NA	TRUE	IVA	Adavosertib	TRUE
EOC277	ADRM1	gain	ADRM1:NM_007002.4:exon7:c.826G>A:p.V276I	chr20:62307798G>A	nonsynonymous_SNV	NA	NA	FALSE	FALSE	FALSE	NA	FALSE	FALSE	TRUE	NA	X	Bortezomib, Ixazomib, Ixazomib Citrate, Oprozomib	FALSE
EOC277	ADRM1	gain	ADRM1:amp	NA	amplification	2	7-12	FALSE	FALSE	FALSE	NA	TRUE	FALSE	NA	NA	X	Bortezomib, Ixazomib, Ixazomib Citrate, Oprozomib	FALSE
EOC277	AURKA	gain	AURKA:amp	NA	amplification	2	7-9	FALSE	FALSE	FALSE	NA	TRUE	FALSE	NA	NA	X	Alisertib, AMG-900, ENMD-2076, ENMD-981693, Ilorasertib, Tozasertib	FALSE
EOC277	BRCA1	loss	BRCA1:NM_007294.4:exon10:c.2799_2811del:p.K935Lfs*61	chr17:43092719GCTTATCTTTCTGA>G	frameshift_deletion	NA	NA	TRUE	FALSE	TRUE	NA	TRUE	TRUE	NA	TRUE	IA	Niraparib, Olaparib, Olaparib + Bevacizumab, Rucaparib	TRUE
EOC277	EML4	gain	EML4:ENST00000318522:e.20::intergenic	chr2:42325790::chr2:124009777	truncated_transcripts	2-4	1-2	FALSE	FALSE	FALSE	NA	TRUE	TRUE	FALSE	NA	X	Alectinib, Ceritinib, Crizotinib, Lorlatinib	FALSE
EOC277	ERBB4	gain	ERBB4:ENST00000342788:e.4_5dup;intergenic::ERBB4:ENST00000342788:e.2	chr2:211743964_211789732dup;chr2:212132690::chr5:16205839	multiple	2	2	FALSE	FALSE	FALSE	NA	FALSE	TRUE	FALSE	NA	IVB	Afatinib, Dacomitinib, Neratinib, Poziotinib, Vandetanib	FALSE
EOC277	FGFR2	gain	TMC5:ENST00000542583:antisense::FGFR2:ENST00000358487:e.6;FGFR2:ENST00000358487:e.5::FGFR2:ENST00000358487:antisense	chr10:121547624::chr16:19430861;chr10:121539602::chr10:121542974	multiple	1-2	3-4	FALSE	FALSE	FALSE	NA	TRUE	TRUE	FALSE	NA	IIIA	Futibatinib, Pemigatinib	FALSE
EOC277	FLT1	gain	FLT1:NM_002019.4:exon5:c.671G>C:p.R224P	chr13:28434063C>G	nonsynonymous_SNV	NA	NA	FALSE	FALSE	FALSE	NA	TRUE	TRUE	FALSE	NA	IVB	Pazopanib, Regorafenib, Sorafenib, Sunitinib, Vandetanib	FALSE
EOC277	MET	gain	MET:ENST00000397752:e.5::intergenic	chr7:116754220::chr7:140491091	truncated_transcripts	2	2	FALSE	FALSE	FALSE	NA	FALSE	TRUE	FALSE	NA	X	Altiratinib, AMG-208, AMG-337, Amivantamab, Cabozantinib, Cabozantinib S-Malate, Capmatinib, Crizotinib, Elzovantinib, Emibetuzumab, Foretinib, Glesatinib, Golvatinib, Merestinib, MK-2461, MK-8033, Onartuzumab, Savolitinib, Tepotinib, Tivantinib	FALSE
EOC277	PSMA7	gain	PSMA7:amp	NA	amplification	2	7-12	FALSE	FALSE	FALSE	NA	TRUE	FALSE	NA	NA	X	Bortezomib, Ixazomib, Ixazomib Citrate, Marizomib, Oprozomib	FALSE
EOC277	PSMC6	gain	PSMC6:NM_002806.5:exon14:c.1117A>G:p.K373E	chr14:52727564A>G	nonsynonymous_SNV	NA	NA	TRUE	FALSE	TRUE	NA	TRUE	TRUE	TRUE	NA	X	Bortezomib, Ixazomib, Ixazomib Citrate, Oprozomib	TRUE
EOC277	PTK6	gain	PTK6:amp	NA	amplification	2	7-12	FALSE	FALSE	FALSE	NA	TRUE	FALSE	NA	NA	X	Vandetanib	FALSE
EOC277	RARB	gain	RARB:NM_000965.5:exon3:c.448+1G>T	chr3:25501324G>T	splicing	NA	NA	FALSE	FALSE	FALSE	NA	TRUE	FALSE	FALSE	NA	X	Tretinoin	FALSE
EOC277	SRMS	gain	SRMS:amp	NA	amplification	2	7-12	FALSE	FALSE	FALSE	NA	TRUE	FALSE	NA	NA	X	Dasatinib, ENMD-981693, Ilorasertib	FALSE
EOC277	TP53	loss	TP53:NM_000546.6:exon5:c.452C>A:p.P151H	chr17:7675160G>T	nonsynonymous_SNV	NA	NA	TRUE	FALSE	TRUE	NA	TRUE	TRUE	NA	TRUE	IVA	Adavosertib	TRUE
EOC278	AKT2	gain	AKT2:amp	NA	amplification	1	8	TRUE	TRUE	FALSE	NA	TRUE	TRUE	TRUE	NA	IVB	Capivasertib	TRUE
EOC278	ATP4A	gain	ATP4A:amp	NA	amplification	1	7	FALSE	FALSE	FALSE	NA	TRUE	FALSE	NA	NA	X	Rabeprazole	FALSE
EOC278	BCR	gain	BCR:NM_004327.4:exon1:c.421G>A:p.E141K	chr22:23181381G>A	nonsynonymous_SNV	NA	NA	FALSE	FALSE	FALSE	NA	TRUE	FALSE	TRUE	NA	X	Asciminib, Bosutinib, Dasatinib, Imatinib, Imatinib Mesylate, Nilotinib, Ponatinib, Ponatinib Hydrochloride	FALSE
EOC278	CCDC6	gain	CCDC6:ENST00000263102:e.7::intergenic	chr10:59788292::chr10:59796648	truncated_transcripts	1-4	1-2	FALSE	FALSE	FALSE	NA	TRUE	TRUE	FALSE	NA	X	Pralsetinib, Selpercatinib	FALSE
EOC278	CD22	gain	CD22:amp	NA	amplification	1	7	FALSE	FALSE	FALSE	NA	TRUE	TRUE	FALSE	NA	X	Epratuzumab	FALSE
EOC278	EZH2	gain	EZH2:NM_004456.5:exon20:c.2207_2220del:p.A736Vfs*22	chr7:148807681ACTTCAGGGCATCAG>A	frameshift_deletion	NA	NA	TRUE	TRUE	FALSE	NA	TRUE	TRUE	TRUE	NA	X	Tazemetostat	TRUE
EOC278	FGFR1	gain	FGFR1:ENST00000447712:e.6::intergenic;SLC20A2:ENST00000520262:e.3::FGFR1:ENST00000447712:e.7	chr8:38215615::chr8:38425456;chr8:38426024::chr8:42463406	balanced_translocation	19	1	FALSE	FALSE	FALSE	NA	FALSE	TRUE	FALSE	NA	IIIA	Pemigatinib	FALSE
EOC278	PSMC4	gain	PSMC4:amp	NA	amplification	1	8	TRUE	TRUE	FALSE	NA	TRUE	TRUE	TRUE	NA	X	Bortezomib, Ixazomib, Ixazomib Citrate, Oprozomib	TRUE
EOC278	PSMD8	gain	PSMD8:amp	NA	amplification	1	7	TRUE	TRUE	FALSE	NA	TRUE	TRUE	TRUE	NA	X	Bortezomib, Ixazomib, Ixazomib Citrate, Oprozomib	TRUE
EOC278	TP53	loss	TP53:NM_000546.6:exon5:c.452C>G:p.P151R	chr17:7675160G>C	nonsynonymous_SNV	NA	NA	TRUE	TRUE	FALSE	NA	TRUE	TRUE	NA	TRUE	IVA	Adavosertib	TRUE
EOC286	ARID1A	loss	ARID1A:ENST00000324856:e.17::intergenic	chr1:26774060::chr1:26810291	truncated_transcripts	1	1	FALSE	FALSE	FALSE	NA	FALSE	TRUE	NA	FALSE	IVA	PLX2853, Tazemetostat	FALSE
EOC286	HDAC4	gain	HDAC4:NM_001378414.1:exon26:c.3101_3119del:p.R1034Pfs*8	chr2:239053570GGTTGTGCGCTGCAGGCAGC>G	frameshift_deletion	NA	NA	FALSE	FALSE	FALSE	NA	TRUE	FALSE	FALSE	NA	X	Belinostat, CUDC-101, Entinostat, Panobinostat	FALSE
EOC286	HDAC4	gain	HDAC4:NM_001378414.1:exon26:c.3097T>A:p.W1033R	chr2:239053593A>T	nonsynonymous_SNV	NA	NA	FALSE	FALSE	FALSE	NA	TRUE	TRUE	FALSE	NA	X	Belinostat, CUDC-101, Entinostat, Panobinostat	FALSE
EOC286	IGF1R	gain	IGF1R:NM_000875.5:exon5:c.1167G>C:p.K389N	chr15:98899541G>C	nonsynonymous_SNV	NA	NA	FALSE	FALSE	TRUE	NA	FALSE	TRUE	TRUE	NA	X	Cixutumumab, Figitumumab, Ganitumab	TRUE
EOC286	ITK	gain	ITK:ENST00000422843:e.1::intergenic	chr1:191779368::chr5:157198160	truncated_transcripts	2	1	FALSE	FALSE	FALSE	NA	FALSE	TRUE	FALSE	NA	X	Pazopanib	FALSE
EOC286	MLH1	loss	MLH1:NM_000249.4:exon13:c.1514G>C:p.S505T	chr3:37028888G>C	nonsynonymous_SNV	NA	NA	FALSE	FALSE	FALSE	NA	FALSE	TRUE	NA	FALSE	IIIA	Talazoparib + Enzalutamide	FALSE
EOC286	TEK	gain	TEK:NM_000459.5:exon6:c.804C>G:p.C268W	chr9:27173265C>G	nonsynonymous_SNV	NA	NA	FALSE	FALSE	FALSE	NA	TRUE	TRUE	FALSE	NA	IVB	Regorafenib, Vandetanib	FALSE
EOC286	TNC	gain	TNC:ENST00000350763:e.16_22del	chr9:115032219_115055411del	frameshift_deletion	1	1	FALSE	FALSE	FALSE	NA	TRUE	TRUE	FALSE	NA	X	F16SIP 131I	FALSE
EOC286	TP53	loss	TP53:NM_000546.6:exon5:c.526T>C:p.C176R	chr17:7675086A>G	nonsynonymous_SNV	NA	NA	TRUE	FALSE	TRUE	NA	TRUE	TRUE	NA	TRUE	IVA	Adavosertib	TRUE
EOC291	HDAC5	gain	HDAC5:ENST00000682912:e.3::HDAC5:ENST00000682912:antisense	chr17:44097293::chr17:44101139	truncated_transcripts	1	2	FALSE	FALSE	FALSE	NA	TRUE	TRUE	FALSE	NA	X	Belinostat, CUDC-101, Entinostat, Panobinostat	FALSE
EOC291	TP53	loss	TP53:NM_000546.6:exon7:c.763A>T:p.I255F	chr17:7674200:T>A	nonsynonymous_SNV	NA	NA	TRUE	FALSE	FALSE	FALSE	TRUE	TRUE	NA	TRUE	IVA	Adavosertib	TRUE
EOC292	ARID1A	loss	RPA2:ENST00000373912:antisense::ARID1A:ENST00000324856:e.9	chr1:26764982::chr1:27922672	fusion_from_unknown	4	1	FALSE	FALSE	FALSE	NA	FALSE	TRUE	NA	FALSE	IVA	PLX2853, Tazemetostat	FALSE
EOC292	BRIP1	loss	BRIP1:NM_032043.3:exon16:c.2364_2366delinsCAATAGGAATTCCTTTACCTGTA:p.V789Nfs*14	NA	germline	NA	NA	NA	NA	NA	NA	NA	TRUE	NA	TRUE	IIIA	Olaparib	TRUE
EOC292	CCDC6	gain	CCDC6:ENST00000263102:e.3dup	chr10:59818211_59841100dup	inframe_duplication	2	1	FALSE	FALSE	FALSE	NA	FALSE	TRUE	FALSE	NA	IVB	Pralsetinib, Selpercatinib	FALSE
EOC292	EML4	gain	intergenic::EML4:ENST00000318522:e.18	chr1:36789730::chr2:42306314	fusion_from_unknown	6	1	FALSE	FALSE	FALSE	NA	TRUE	TRUE	FALSE	NA	IVB	Alectinib, Ceritinib, Crizotinib, Lorlatinib	FALSE
EOC292	ENG	gain	ENG:NM_001114753.3:exon15:c.1940C>T:p.T647I	chr9:127815719G>A	nonsynonymous_SNV	NA	NA	TRUE	FALSE	FALSE	NA	TRUE	TRUE	TRUE	NA	X	Carotuximab	TRUE
EOC292	HAVCR2	gain	HAVCR2:ENST00000307851:e.5del	chr5:157092644_157098079del	frameshift_deletion	2	1	FALSE	FALSE	FALSE	NA	FALSE	TRUE	FALSE	NA	X	Sabatolimab	FALSE
EOC292	IGF1R	gain	intergenic::IGF1R:ENST00000650285:e.2	chr15:98054781::chr15:98664757	fusion_from_unknown	3	1	FALSE	FALSE	FALSE	NA	FALSE	TRUE	FALSE	NA	X	Cixutumumab, Figitumumab, Ganitumab	FALSE
EOC292	KRAS	gain	KRAS:amp	NA	amplification	6-24	7-33	TRUE	FALSE	TRUE	NA	TRUE	TRUE	TRUE	NA	IVB	Adagrasib, Sotorasib	TRUE
EOC292	NF1	loss	TMEM63C:ENST00000298351:e.24::NF1:ENST00000358273:e.31	chr14:77258457::chr17:31252165	fusion	1-2	1-2	FALSE	FALSE	FALSE	NA	TRUE	TRUE	NA	FALSE	IIIA	Selumetinib	FALSE
EOC292	PTK2	gain	PTK2:ENST00000522684:e.31::AGO2:ENST00000220592:e.2	chr8:140626087::chr8:140664132	multiple	7	1	TRUE	FALSE	FALSE	NA	TRUE	TRUE	TRUE	NA	X	Defactinib, GSK-2256098	TRUE
EOC292	RAD51B	loss	RAD51B:ENST00000471583:e.8_9dup	chr14:68035773_68428237dup	inframe_duplication	2	1	FALSE	FALSE	FALSE	NA	FALSE	TRUE	NA	FALSE	IIIA	Olaparib	FALSE
EOC292	TIGIT	gain	TIGIT:NM_173799.4:exon4:c.713G>A:p.S238N	chr3:114308109G>A	nonsynonymous_SNV	NA	NA	FALSE	FALSE	FALSE	NA	TRUE	FALSE	FALSE	NA	X	Domvanalimab, Ociperlimab, Tiragolumab	FALSE
EOC292	TP53	loss	TP53:NM_000546.6:exon6:c.568_569del:p.P190Sfs*18	chr17:7674961AGG>A	frameshift_deletion	NA	NA	TRUE	FALSE	TRUE	NA	TRUE	TRUE	NA	TRUE	IVA	Adavosertib	TRUE
EOC293	ADRA1A	gain	ADRA1A:ENST00000380586:e.2::intergenic	chr8:26753216::chr8:29279269	truncated_transcripts	2	1	FALSE	FALSE	FALSE	NA	TRUE	FALSE	FALSE	NA	X	Carvedilol	FALSE
EOC293	ARAF	gain	ARAF:NM_001654.5:exon9:c.752A>G:p.D251G	chrX:47567010A>G	nonsynonymous_SNV	NA	NA	FALSE	FALSE	FALSE	NA	TRUE	FALSE	TRUE	NA	X	Belvarafenib, Cobimetinib, Sorafenib, Tovorafenib, Trametinib	FALSE
EOC293	CDK12	loss	CDK12:NM_016507.4:exon2:c.1745C>G:p.S582X	chr17:39471577C>G	stopgain	NA	NA	FALSE	TRUE	TRUE	NA	TRUE	TRUE	NA	TRUE	IIIA	Olaparib, Talazoparib + Enzalutamide	TRUE
EOC293	COL4A4	gain	COL4A4:ENST00000396625:e.37::COL4A3:ENST00000396578:antisense	chr2:227041909::chr2:227166806	truncated_transcripts	2	1	FALSE	FALSE	FALSE	NA	TRUE	TRUE	FALSE	NA	X	TRC-093	FALSE
EOC293	CYP3A43	gain	CYP3A43:ENST00000354829:e.3::SMURF1:ENST00000361368:antisense	chr7:99119976::chr7:99839304	truncated_transcripts	3	1	FALSE	FALSE	FALSE	NA	FALSE	TRUE	FALSE	NA	X	Cobicistat, Ritonavir	FALSE
EOC293	EPHB4	gain	intergenic::EPHB4:ENST00000358173:e.13	chr7:100281104::chr7:100810166	fusion_from_unknown	2	1	FALSE	FALSE	FALSE	NA	FALSE	TRUE	FALSE	NA	IVB	Vandetanib	FALSE
EOC293	GRIN2B	gain	GRIN2B:ENST00000609686:e.4::ANO6:ENST00000320560:e.2	chr12:13735870::chr12:45216086	fusion	2	1	FALSE	FALSE	FALSE	NA	FALSE	TRUE	FALSE	NA	X	Memantine	FALSE
EOC293	HDAC9	gain	intergenic::HDAC9:ENST00000686413:e.22	chr7:18874336::chr7:19277105	fusion_from_unknown	3	1	FALSE	FALSE	FALSE	NA	FALSE	TRUE	FALSE	NA	X	Belinostat, CUDC-101, Entinostat, Panobinostat	FALSE
EOC293	HTR3A	gain	ZBTB16:ENST00000335953:e.4::HTR3A:ENST00000504030:e.2	chr11:113965265::chr11:114203448	fusion	2	1-2	FALSE	FALSE	FALSE	NA	FALSE	TRUE	FALSE	NA	X	Dolasetron, Dolasetron Mesylate, Granisetron, Granisetron Hydrochloride, Ondansetron, Ondansetron Hydrochloride, Palonosetron, Palonosetron Hydrochloride, Ramosetron	FALSE
EOC293	MSTN	gain	OSGEPL1:ENST00000264151:e.5::MSTN:ENST00000260950:e.2	chr2:189753031::chr2:190064161	fusion	3	1	FALSE	FALSE	FALSE	NA	FALSE	TRUE	FALSE	NA	X	Landogrozumab	FALSE
EOC293	NDUFB9	gain	NDUFB9:amp	NA	amplification	1-2	11-14	FALSE	TRUE	TRUE	NA	TRUE	TRUE	TRUE	NA	X	Metformin	TRUE
EOC293	NRG1	gain	UNC5D:ENST00000404895:e.1::NRG1:ENST00000405005:e.2;UNC5D:ENST00000404895:e.1::NRG1:ENST00000520407:e.2	chr8:32234681::chr8:35325795	fusion	2	0-1	FALSE	FALSE	FALSE	NA	TRUE	TRUE	FALSE	NA	II	Zenocutuzumab	FALSE
EOC293	NTRK2	gain	NTRK2:ENST00000277120:e.14::ARID1B:ENST00000636930:antisense	chr6:157139504::chr9:84892490	truncated_transcripts	4	1	FALSE	FALSE	FALSE	NA	FALSE	TRUE	FALSE	NA	X	Altiratinib, Entrectinib, Larotrectinib, Larotrectinib Sulfate, Repotrectinib, Selitrectinib, Taletrectinib, Zurletrectinib	FALSE
EOC293	NTRK3	gain	SH3GL3:ENST00000427482:antisense::NTRK3:ENST00000629765:e.15	chr15:83556830::chr15:87997156	fusion_from_unknown	2	1	FALSE	FALSE	FALSE	NA	TRUE	TRUE	FALSE	NA	IC	Entrectinib, Larotrectinib, Repotrectinib	FALSE
EOC293	PSMD14	gain	SLC4A10:ENST00000446997:e.1::PSMD14:ENST00000409682:e.4	chr2:161334031::chr2:161666482	fusion	2-3	0-1	FALSE	FALSE	FALSE	NA	TRUE	TRUE	FALSE	NA	X	Bortezomib, Ixazomib, Ixazomib Citrate, Oprozomib	FALSE
EOC293	PTEN	loss	PTEN:ENST00000371953:e.5::intergenic	chr10:83711908::chr10:87951463	truncated_transcripts	2	1	FALSE	FALSE	FALSE	NA	FALSE	TRUE	NA	FALSE	IIIA	Capivasertib + Fulvestrant	FALSE
EOC293	TP53	loss	TP53:NM_000546.6:exon8:c.818G>A:p.R273H	chr17:7673802C>T	nonsynonymous_SNV	NA	NA	FALSE	TRUE	TRUE	NA	TRUE	TRUE	NA	TRUE	IVA	Adavosertib	TRUE
EOC294	ARAF	gain	ARAF:NM_001654.5:exon13:c.1378G>T:p.A460S	chrX:47569616G>T	nonsynonymous_SNV	NA	NA	FALSE	FALSE	FALSE	NA	FALSE	FALSE	TRUE	NA	X	Belvarafenib, Cobimetinib, Sorafenib, Tovorafenib, Trametinib	FALSE
EOC294	BRCA2	loss	BRCA2:NM_000059.4:exon11:c.3846_3847del:p.V1283Kfs*2	NA	germline	NA	NA	NA	NA	NA	NA	NA	TRUE	NA	TRUE	IA	Niraparib, Olaparib, Olaparib + Bevacizumab, Rucaparib	TRUE
EOC294	CCR2	gain	CCR2:NM_001123396.4:exon2:c.1016C>G:p.T339R	chr3:46358543C>G	nonsynonymous_SNV	NA	NA	FALSE	FALSE	FALSE	NA	FALSE	FALSE	FALSE	NA	X	BMS-813160	FALSE
EOC294	CTLA4	gain	CTLA4:amp	NA	amplification	1-2	2-7	FALSE	FALSE	FALSE	NA	FALSE	FALSE	NA	NA	X	Cadonilimab, Ipilimumab, Tremelimumab, Zalifrelimab	FALSE
EOC294	EPHA5	gain	EPHA5:ENST00000613740:e.4_5del	chr4:65479363_65507433del	inframe_deletion	2-3	1	FALSE	FALSE	FALSE	NA	FALSE	TRUE	FALSE	NA	IVB	Vandetanib	FALSE
EOC294	EPHA6	gain	intergenic::EPHA6:ENST00000389672:e.2;EPHA6:ENST00000389672:e.1::intergenic	chr3:96848236::chr18:3054456;chr3:96848218::chr18:3054439	balanced_translocation	2	1	FALSE	FALSE	FALSE	NA	FALSE	TRUE	FALSE	NA	IVB	Vandetanib	FALSE
EOC294	EPHA7	gain	EPHA7:NM_004440.4:exon15:c.2547A>G:p.I849M	chr6:93246971T>C	nonsynonymous_SNV	NA	NA	TRUE	FALSE	FALSE	NA	TRUE	TRUE	TRUE	NA	IVB	Vandetanib	TRUE
EOC294	EPHA7	gain	EPHA7:NM_004440.4:exon7:c.1513C>G:p.L505V	chr6:93269597G>C	nonsynonymous_SNV	NA	NA	FALSE	FALSE	FALSE	NA	FALSE	TRUE	FALSE	NA	IVB	Vandetanib	FALSE
EOC294	EPHA7	gain	EPHA7:NM_004440.4:exon7:c.1523G>A:p.G508E	chr6:93269587C>T	nonsynonymous_SNV	NA	NA	FALSE	FALSE	FALSE	NA	FALSE	TRUE	FALSE	NA	IVB	Vandetanib	FALSE
EOC294	ERBB4	gain	ERBB4:ENST00000342788:e.20::WWP2:ENST00000359154:antisense	chr2:211498412::chr16:69921049	truncated_transcripts	1	1	FALSE	FALSE	FALSE	NA	FALSE	TRUE	FALSE	NA	X	AC-480, Afatinib, BMS-690514, Dacomitinib, Dacomitinib Anhydrous, JNJ-26483327, Neratinib, Poziotinib, Vandetanib	FALSE
EOC294	ESR1	gain	ESR1:ENST00000427531:e.3_6del	chr6:151878014_152107678del	inframe_deletion	0	1	FALSE	FALSE	FALSE	NA	FALSE	TRUE	FALSE	NA	IIIB	Elacestrant	FALSE
EOC294	GSK3B	gain	GSK3B:ENST00000264235:e.9_10del	chr3:119843196_119864576del	frameshift_deletion	3	1	FALSE	FALSE	FALSE	NA	FALSE	TRUE	FALSE	NA	X	LY-2090314	FALSE
EOC294	IDH1	gain	IDH1:amp	NA	amplification	1-2	2-7	FALSE	FALSE	FALSE	NA	FALSE	FALSE	NA	NA	X	IDH305, Ivosidenib, Olutasidenib, Vorasidenib	FALSE
EOC294	KRAS	gain	KRAS:amp	NA	amplification	1-2	3-27	FALSE	TRUE	FALSE	NA	FALSE	TRUE	TRUE	NA	IVB	Adagrasib, Sotorasib	TRUE
EOC294	NDUFA10	gain	AGTPBP1:ENST00000357081:e.24::NDUFA10:ENST00000252711:e.2	chr2:240034217::chr9:85575960	fusion	6	1	FALSE	FALSE	FALSE	NA	FALSE	TRUE	FALSE	NA	X	Metformin	FALSE
EOC294	NDUFB5	gain	NDUFB5:amp	NA	amplification	3-4	4-5	FALSE	FALSE	FALSE	NA	FALSE	FALSE	NA	NA	X	Metformin	FALSE
EOC294	NDUFB7	gain	NDUFB7:amp	NA	amplification	2	6-7	FALSE	FALSE	FALSE	NA	FALSE	TRUE	NA	NA	X	Metformin	NA
EOC294	NDUFB7	gain	NDUFB7:NM_004146.6:exon3:c.344G>T:p.R115L	chr19:14566203C>A	nonsynonymous_SNV	NA	NA	FALSE	FALSE	FALSE	NA	TRUE	FALSE	TRUE	NA	X	Metformin	FALSE
EOC294	NDUFS1	gain	NDUFS1:amp	NA	amplification	1-2	2-7	FALSE	FALSE	FALSE	NA	FALSE	FALSE	NA	NA	X	Metformin	FALSE
EOC294	PIK3CA	gain	PIK3CA:amp	NA	amplification	3-4	4-5	FALSE	FALSE	FALSE	NA	FALSE	FALSE	NA	NA	X	Alpelisib, Apitolisib, BGT-226, Capivasertib, Dactolisib, Fulvestrant, Gedatolisib, Inavolisib, Omipalisib, Palbociclib, PF-04691502, Pictilisib, Pilaralisib, Serabelisib, SF-1126, Sonolisib, Voxtalisib	FALSE
EOC294	PTK6	gain	PTK6:NM_005975.4:exon3:c.425C>T:p.A142V	chr20:63534243G>A	nonsynonymous_SNV	NA	NA	FALSE	FALSE	FALSE	NA	FALSE	FALSE	FALSE	NA	X	Vandetanib	FALSE
EOC294	TP53	loss	TP53:NM_000546.6:exon4:c.321_329del:p.G108_R110del	chr17:7676039ACGGAAACCG>A	inframe_deletion	NA	NA	TRUE	TRUE	TRUE	NA	TRUE	TRUE	NA	TRUE	IVA	Adavosertib	TRUE
EOC295	ADRB3	gain	ADRB3:amp	NA	amplification	0	12-16	FALSE	FALSE	FALSE	TRUE	TRUE	FALSE	NA	NA	X	Carvedilol	FALSE
EOC295	CXCL8	gain	CXCL8:amp	NA	amplification	1	10-13	FALSE	FALSE	FALSE	TRUE	TRUE	FALSE	NA	NA	X	Adakitug	FALSE
EOC295	ERBB2	gain	ERBB2:NM_004448.4:exon18:c.2089G>A:p.V697M	chr17:39723541G>A	nonsynonymous_SNV	NA	NA	FALSE	TRUE	FALSE	TRUE	TRUE	TRUE	TRUE	NA	IIIA	Trastuzumab Deruxtecan, Ado-Trastuzumab Emtansine, Neratinib	TRUE
EOC295	FGFR1	gain	FGFR1:amp	NA	amplification	0	18-23	FALSE	FALSE	FALSE	TRUE	TRUE	FALSE	NA	NA	X	AZD-4547, Brivanib, Brivanib Alaninate, ENMD-981693, Erdafitinib, Fexagratinib, Futibatinib, Infigratinib, Lucitanib, Pazopanib, Pemigatinib, Regorafenib, Rogaratinib, XL-999	FALSE
EOC295	FNTA	gain	FNTA:amp	NA	amplification	1-2	11-13	FALSE	TRUE	FALSE	TRUE	TRUE	TRUE	TRUE	NA	IVB	Tipifarnib	TRUE
EOC295	MTOR	gain	MTOR:NM_004958.4:exon47:c.6589C>G:p.R2197G	chr1:11124571G>C	nonsynonymous_SNV	NA	NA	FALSE	TRUE	FALSE	TRUE	TRUE	TRUE	TRUE	NA	IIIB	Everolimus	TRUE
EOC295	NDUFS5	gain	NDUFS5:amp	NA	amplification	1-2	7-12	FALSE	FALSE	FALSE	TRUE	TRUE	FALSE	NA	NA	X	Metformin	FALSE
EOC295	TP53	loss	TP53:NM_000546.6:exon8:c.817C>T:p.R273C	chr17:7673803G>A	nonsynonymous_SNV	NA	NA	FALSE	TRUE	FALSE	TRUE	TRUE	TRUE	NA	TRUE	IVA	Adavosertib	TRUE
EOC299	AKT3	gain	AKT3:ENST00000673466:e.2::CATSPERE:ENST00000366534:antisense	chr1:243724333::chr1:244605740	truncated_transcripts	5	1	FALSE	FALSE	FALSE	FALSE	FALSE	FALSE	FALSE	NA	X	Afuresertib, Capivasertib, Ipatasertib, MK-2206, Triciribine Phosphate, Uprosertib	FALSE
EOC299	ATP4A	gain	ATP4A:amp	NA	amplification	1-2	1-7	FALSE	FALSE	FALSE	TRUE	FALSE	FALSE	NA	NA	X	Rabeprazole	FALSE
EOC299	ATR	loss	ATR:NM_001184.4:exon17:c.3402delT:p.F1134Lfs*6	chr3:142542712TA>T	frameshift_deletion	NA	NA	FALSE	FALSE	FALSE	TRUE	FALSE	TRUE	NA	FALSE	IIIA	Talazoparib + Enzalutamide	FALSE
EOC299	CCNE1	gain	CCNE1:amp	NA	amplification	1-2	26-32	TRUE	FALSE	TRUE	TRUE	TRUE	TRUE	TRUE	NA	IVA	Lunresertib + Camonsertib	TRUE
EOC299	CD22	gain	CD22:amp	NA	amplification	1-2	1-7	FALSE	FALSE	FALSE	TRUE	FALSE	TRUE	FALSE	NA	X	Epratuzumab	FALSE
EOC299	FNTA	gain	FNTA:amp	NA	amplification	2	24-25	TRUE	FALSE	TRUE	TRUE	TRUE	TRUE	TRUE	NA	IVB	Tipifarnib	TRUE
EOC299	MTOR	gain	MTOR:NM_004958.4:exon41:c.5726T>C:p.L1909S	chr1:11128940A>G	nonsynonymous_SNV	NA	NA	TRUE	FALSE	TRUE	TRUE	TRUE	TRUE	TRUE	NA	IIIB	Everolimus	TRUE
EOC299	NDUFAF2	gain	ELOVL7:ENST00000508821:antisense::NDUFAF2:ENST00000296597:e.4	chr5:60762427::chr5:61144688	fusion_from_unknown	1	1	FALSE	FALSE	FALSE	TRUE	FALSE	TRUE	FALSE	NA	X	Metformin	FALSE
EOC299	PSMA6	gain	PSMA6:amp	NA	amplification	2	2-7	FALSE	FALSE	FALSE	TRUE	FALSE	FALSE	NA	NA	X	Bortezomib, Ixazomib, Ixazomib Citrate, Marizomib, Oprozomib	FALSE
EOC299	PSMD8	gain	PSMD8:amp	NA	amplification	1-2	1-9	TRUE	FALSE	FALSE	TRUE	FALSE	TRUE	TRUE	NA	X	Bortezomib, Ixazomib, Ixazomib Citrate, Oprozomib	TRUE
EOC299	TP53	loss	TP53:NM_000546.6:exon7:c.725G>T:p.C242F	chr17:7674238C>A	nonsynonymous_SNV	NA	NA	TRUE	FALSE	TRUE	TRUE	TRUE	TRUE	NA	TRUE	IVA	Adavosertib	TRUE
EOC299	TSC1	loss	TSC1:ENST00000298552:e.3::AK8:ENST00000298545:e.12	chr9:132767884::chr9:132927874	fusion	0	2-3	TRUE	FALSE	TRUE	TRUE	TRUE	TRUE	NA	TRUE	IIIA	Everolimus	TRUE
EOC3	CDKN2A	loss	CDKN2A:del	NA	deletion	0	NA	TRUE	TRUE	TRUE	NA	FALSE	TRUE	NA	TRUE	IVA	Abemaciclib, Palbociclib, Ribociclib	TRUE
EOC3	CSF1R	gain	intergenic::CSF1R:ENST00000675795:e.6	chr5:149095838::chr5:150076538	fusion_from_unknown	2	0	FALSE	FALSE	FALSE	NA	FALSE	TRUE	FALSE	NA	IVB	Elzovantinib, Fexagratinib, Pazopanib, Quizartinib, Sunitinib	FALSE
EOC3	ESR1	gain	intergenic::ESR1:ENST00000206249:e.3	chr6:151850551::chr6:154674243	fusion_from_unknown	1-2	1-2	FALSE	FALSE	FALSE	NA	TRUE	TRUE	FALSE	NA	IIIB	Elacestrant	FALSE
EOC3	GRIN2A	gain	GRIN2A:NM_001134407.3:exon2:c.38C>T:p.P13L	chr16:10180374G>A	nonsynonymous_SNV	NA	NA	FALSE	FALSE	FALSE	NA	TRUE	FALSE	TRUE	NA	X	Memantine	FALSE
EOC3	MTOR	gain	MTOR:NM_004958.4:exon52:c.7102C>T:p.R2368X	chr1:11114875G>A	stopgain	NA	NA	FALSE	FALSE	FALSE	NA	FALSE	FALSE	TRUE	NA	X	Apitolisib, AZD-8055, BGT-226, Dactolisib, Everolimus, Gedatolisib, Omipalisib, PF-04691502, Ridaforolimus, Sapanisertib, SF-1126, Temsirolimus, Vistusertib, Voxtalisib	FALSE
EOC3	NF1	loss	NF1:ENST00000358273:e.5_19del	chr17:31169630_31227405del	frameshift_deletion	0	1-2	TRUE	TRUE	TRUE	NA	TRUE	TRUE	NA	TRUE	IIIA	Selumetinib	TRUE
EOC3	PDE10A	gain	intergenic::PDE10A:ENST00000539869:e.2	chr6:163803767::chr6:165930496;chr6:165088289::chr6:165666488	multiple	2	1	FALSE	FALSE	FALSE	NA	FALSE	TRUE	FALSE	NA	X	PBF-999	FALSE
EOC3	PTGS2	gain	PTGS2:NM_000963.4:exon4:c.440C>T:p.T147I	chr1:186678278G>A	nonsynonymous_SNV	NA	NA	FALSE	FALSE	FALSE	NA	FALSE	TRUE	FALSE	NA	X	Celecoxib	FALSE
EOC3	RAD51B	loss	RAD51B:ENST00000471583:e.7::RDH12:ENST00000551171:e.2	chr14:67699617::chr14:67929975	fusion	2-3	1	FALSE	FALSE	FALSE	NA	FALSE	TRUE	NA	FALSE	IIIA	Olaparib	FALSE
EOC3	RAD54L	loss	TRABD2B:ENST00000606738:antisense::RAD54L:ENST00000371975:e.9	chr1:46267353::chr1:47943111	fusion_from_unknown	2-3	1	FALSE	FALSE	FALSE	NA	TRUE	TRUE	NA	FALSE	IIIA	Olaparib	FALSE
EOC3	RARB	gain	intergenic::RARB:ENST00000330688:e.2	chr3:24793522::chr8:59931476	fusion_from_unknown	2	0	FALSE	FALSE	FALSE	NA	FALSE	TRUE	FALSE	NA	IVB	Tretinoin	FALSE
EOC3	TP53	loss	TP53:NM_000546.6:exon5:c.532delC:p.H178Tfs*69	chr17:7675079TG>T	frameshift_deletion	NA	NA	TRUE	TRUE	TRUE	NA	TRUE	TRUE	NA	TRUE	IVA	Adavosertib	TRUE
EOC306	BRCA1	loss	BRCA1:NM_007294.4:exon10:c.1319delT:p.L440*	chr17:43094211TA>T	stopgain	NA	NA	FALSE	TRUE	FALSE	NA	TRUE	TRUE	NA	TRUE	IA	Niraparib, Olaparib, Olaparib + Bevacizumab, Rucaparib	TRUE
EOC306	CCDC6	gain	CCDC6:ENST00000263102:e.1::ANK3:ENST00000280772:e.29	chr10:59904762::chr10:60089172	fusion	4	1	FALSE	FALSE	FALSE	NA	TRUE	TRUE	FALSE	NA	IVB	Pralsetinib, Selpercatinib	FALSE
EOC306	ITK	gain	PPARGC1B:ENST00000309241:antisense::ITK:ENST00000422843:e.5;ITK:ENST00000422843:e.4::PPARGC1B:ENST00000309241:antisense	chr5:149743708::chr5:157217006;chr5:149754573::chr5:157217244	balanced_translocation	3	2	FALSE	FALSE	FALSE	NA	TRUE	TRUE	FALSE	NA	IVB	Pazopanib	FALSE
EOC306	NDUFB9	gain	NDUFB9:amp	NA	amplification	2	9	FALSE	TRUE	FALSE	NA	TRUE	TRUE	TRUE	NA	X	Metformin	TRUE
EOC306	NF1	loss	NF1:ENST00000358273:e.1_57del	chr17:31084908_31366628del	5prime_deletion	0	3	FALSE	TRUE	FALSE	NA	TRUE	TRUE	NA	TRUE	IIIA	Selumetinib	TRUE
EOC306	NOTCH1	gain	NOTCH1:ENST00000651671:e.13::PRRX2:ENST00000372469:antisense	chr9:129669464::chr9:136514547	truncated_transcripts	2	1	FALSE	FALSE	FALSE	NA	TRUE	TRUE	FALSE	NA	X	Brontictuzumab	FALSE
EOC306	PARP1	gain	DNAH14:ENST00000682510:antisense::PARP1:ENST00000366794:e.22	chr1:225299574::chr1:226363044	fusion_from_unknown	3	1	FALSE	FALSE	FALSE	NA	TRUE	TRUE	FALSE	NA	IVB	Niraparib, Olaparib, Rucaparib, Talazoparib	FALSE
EOC306	PSMD12	gain	intergenic::PSMD12:ENST00000356126:e.2	chr17:67360693::chr22:34522582	fusion_from_unknown	4	2	FALSE	FALSE	FALSE	NA	TRUE	TRUE	FALSE	NA	X	Bortezomib, Ixazomib, Ixazomib Citrate, Oprozomib	FALSE
EOC306	TP53	loss	TP53:NM_000546.6:exon8:c.841G>C:p.D281H	chr17:7673779C>G	nonsynonymous_SNV	NA	NA	FALSE	TRUE	FALSE	NA	TRUE	TRUE	NA	TRUE	IVA	Adavosertib	TRUE
EOC308	BRIP1	loss	BRIP1:NM_032043.3:exon5:c.484C>T:p.R162X	NA	germline	NA	NA	NA	NA	NA	NA	NA	TRUE	NA	TRUE	IIIA	Olaparib	TRUE
EOC308	CCNE1	gain	CCNE1:amp	NA	amplification	2-5	10-17	TRUE	FALSE	TRUE	NA	TRUE	TRUE	TRUE	NA	IVA	Lunresertib + Camonsertib	TRUE
EOC308	EPHB3	gain	EPHB3:amp	NA	amplification	3-7	11-28	FALSE	FALSE	FALSE	NA	TRUE	FALSE	NA	NA	X	Vandetanib	FALSE
EOC308	EPHB3	gain	FOXP1:ENST00000649528:antisense::EPHB3:ENST00000330394:e.2	chr3:71100056::chr3:184556194	fusion_from_unknown	15	1	FALSE	FALSE	FALSE	NA	FALSE	TRUE	FALSE	NA	IVB	Vandetanib	FALSE
EOC308	HTR3C	gain	HTR3C:amp	NA	amplification	3-7	11-28	FALSE	FALSE	FALSE	NA	TRUE	FALSE	NA	NA	X	Ramosetron	FALSE
EOC308	HTR3D	gain	HTR3D:amp	NA	amplification	3-7	11-28	FALSE	FALSE	FALSE	NA	TRUE	FALSE	NA	NA	X	Ramosetron	FALSE
EOC308	HTR3E	gain	HTR3E:amp	NA	amplification	3-7	11-28	FALSE	FALSE	FALSE	NA	TRUE	FALSE	NA	NA	X	Ramosetron	FALSE
EOC308	NDUFB5	gain	NDUFB5:amp	NA	amplification	3-7	11-28	FALSE	FALSE	FALSE	NA	TRUE	FALSE	NA	NA	X	Metformin	FALSE
EOC308	NF1	loss	NF1:ENST00000358273:e.1::NF1:ENST00000358273:antisense	chr17:31094099::chr17:31118437	truncated_transcripts	0	3-4	TRUE	TRUE	TRUE	NA	TRUE	TRUE	NA	TRUE	IIIA	Selumetinib	TRUE
EOC308	NF1	loss	NF1:NM_001042492.3:exon58:c.8441G>A:p.R2814H	chr17:31374076G>A	nonsynonymous_SNV	NA	NA	FALSE	FALSE	FALSE	NA	FALSE	TRUE	NA	FALSE	IIIA	Selumetinib	FALSE
EOC308	PIK3CA	gain	PIK3CA:amp	NA	amplification	3-7	11-28	FALSE	FALSE	FALSE	NA	TRUE	FALSE	NA	NA	X	Alpelisib, Apitolisib, BGT-226, Capivasertib, Dactolisib, Fulvestrant, Gedatolisib, Inavolisib, Omipalisib, Palbociclib, PF-04691502, Pictilisib, Pilaralisib, Serabelisib, SF-1126, Sonolisib, Voxtalisib	FALSE
EOC308	PSMC4	gain	PSMC4:ENST00000157812:e.1_6del	chr19:39930268_39976668del	5prime_deletion	1-2	2-3	FALSE	FALSE	FALSE	NA	TRUE	TRUE	FALSE	NA	X	Bortezomib, Ixazomib, Ixazomib Citrate, Oprozomib	FALSE
EOC308	PSMD2	gain	PSMD2:amp	NA	amplification	3-7	11-28	TRUE	TRUE	TRUE	NA	TRUE	TRUE	TRUE	NA	X	Bortezomib, Ixazomib, Ixazomib Citrate, Oprozomib	TRUE
EOC308	TP53	loss	TP53:NM_000546.6:exon6:c.629delA:p.N210Tfs*37	chr17:7674901GT>G	frameshift_deletion	NA	NA	TRUE	TRUE	TRUE	NA	TRUE	TRUE	NA	TRUE	IVA	Adavosertib	TRUE
EOC309	ADRA1D	gain	ADRA1D:amp	NA	amplification	3	5	FALSE	FALSE	FALSE	NA	TRUE	FALSE	NA	NA	X	Carvedilol	FALSE
EOC309	ADRM1	gain	ADRM1:amp	NA	amplification	3	6	FALSE	FALSE	FALSE	NA	TRUE	FALSE	NA	NA	X	Bortezomib, Ixazomib, Ixazomib Citrate, Oprozomib	FALSE
EOC309	AKT1	gain	AKT1:amp	NA	amplification	2	6	FALSE	TRUE	FALSE	NA	TRUE	TRUE	TRUE	NA	IVB	Capivasertib	TRUE
EOC309	BCL2L1	gain	BCL2L1:amp	NA	amplification	3	6	FALSE	FALSE	FALSE	NA	TRUE	FALSE	NA	NA	X	Navitoclax	FALSE
EOC309	BCR	gain	BCR:ENST00000305877:e.1_17dup	chr22:23115217_23310051dup	truncated_duplication	0	2	FALSE	FALSE	FALSE	NA	TRUE	TRUE	FALSE	NA	X	Asciminib, Bosutinib, Dasatinib, Imatinib, Imatinib Mesylate, Nilotinib, Ponatinib, Ponatinib Hydrochloride	FALSE
EOC309	CCNE1	gain	CCNE1:amp	NA	amplification	2	42-43	TRUE	TRUE	FALSE	NA	TRUE	TRUE	TRUE	NA	IVA	Lunresertib + Camonsertib	TRUE
EOC309	EPHA2	gain	EPHA2:ENST00000358432:e.10::intergenic	chr1:16105493::chr1:16133541	truncated_transcripts	3	1	FALSE	FALSE	FALSE	NA	FALSE	TRUE	FALSE	NA	X	Dasatinib, Regorafenib, Vandetanib	FALSE
EOC309	FGFR3	gain	FGFR3:amp	NA	amplification	0	12-13	TRUE	TRUE	FALSE	NA	TRUE	TRUE	TRUE	NA	IVB	Erdafitinib, Fexagratinib, Futibatinib, Pazopanib, Pemigatinib	TRUE
EOC309	FKBP1A	gain	FKBP1A:amp	NA	amplification	3	5	FALSE	FALSE	FALSE	NA	TRUE	FALSE	NA	NA	X	Everolimus, Sirolimus, Tacrolimus Anhydrous, Temsirolimus	FALSE
EOC309	HCK	gain	HCK:amp	NA	amplification	3	6	FALSE	FALSE	FALSE	NA	TRUE	FALSE	NA	NA	X	Bosutinib, Dasatinib, ENMD-981693, Ilorasertib	FALSE
EOC309	NBN	loss	NBN:NM_002485.5:exon2:c.124A>T:p.S42C	chr8:89982769T>A	nonsynonymous_SNV	NA	NA	FALSE	FALSE	FALSE	NA	TRUE	TRUE	NA	FALSE	IIIA	Talazoparib + Enzalutamide	FALSE
EOC309	PTK2	gain	PTK2:ENST00000696786:e.5::intergenic	chr8:140850629::chr8:141444589	truncated_transcripts	4	1	FALSE	FALSE	FALSE	NA	TRUE	TRUE	FALSE	NA	X	Defactinib, GSK-2256098	FALSE
EOC309	SDC4	gain	intergenic::SDC4:ENST00000372733:e.2	chr20:45240650::chr20:45346339	fusion_from_unknown	7-8	5	FALSE	FALSE	FALSE	NA	TRUE	TRUE	FALSE	NA	IVB	Repotrectinib	FALSE
EOC309	SDC4	gain	SDC4:amp	NA	amplification	3	10-11	FALSE	FALSE	FALSE	NA	TRUE	FALSE	NA	NA	X	Repotrectinib	FALSE
EOC309	TP53	loss	TP53:NM_000546.6:exon7:c.747G>T:p.R249S	chr17:7674216C>A	nonsynonymous_SNV	NA	NA	TRUE	TRUE	FALSE	NA	TRUE	TRUE	NA	TRUE	IVA	Adavosertib	TRUE
EOC310	ADRB3	gain	ADRB3:amp	NA	amplification	1	7-11	FALSE	FALSE	FALSE	NA	FALSE	FALSE	NA	NA	X	Carvedilol	FALSE
EOC310	ALK	gain	ALK:ENST00000389048:e.1::intergenic	chr2:29901998::chr2:231872586	truncated_transcripts	3	2	FALSE	FALSE	FALSE	NA	TRUE	TRUE	FALSE	NA	X	Alectinib, ASP-3026, Brigatinib, Ceritinib, Crizotinib, Entrectinib, Lorlatinib	FALSE
EOC310	CCND1	gain	CCND1:amp	NA	amplification	2	8	FALSE	FALSE	FALSE	NA	FALSE	FALSE	NA	NA	X	Palbociclib	FALSE
EOC310	CCNE1	gain	CCNE1:amp	NA	amplification	3-4	9-12	FALSE	TRUE	TRUE	NA	TRUE	TRUE	TRUE	NA	IVA	Lunresertib + Camonsertib	TRUE
EOC310	EGFR	gain	intergenic::EGFR:ENST00000275493:e.2	chr7:55073061::chr19:30057250	fusion_from_unknown	6	1	FALSE	FALSE	FALSE	NA	FALSE	TRUE	FALSE	NA	IIIB	Erlotinib, Cetuximab, Cetuximab + Chemotherapy, Panitumumab, Panitumumab + Chemotherapy, Afatinib, Amivantamab + Chemotherapy, Amivantamab + Lazertinib, Dacomitinib, Erlotinib + Ramucirumab, Gefitinib, Osimertinib, Osimertinib + Chemotherapy, Amivantamab	FALSE
EOC310	EPHB6	gain	EPHB6:NM_004445.6:exon7:c.308C>T:p.A103V	chr7:142864108C>T	nonsynonymous_SNV	NA	NA	FALSE	FALSE	FALSE	NA	TRUE	FALSE	TRUE	NA	X	Vandetanib	FALSE
EOC310	ERBB2	gain	ERBB2:ENST00000269571:e.1_14dup	chr17:39691628_39717114dup	truncated_duplication	3	0-1	FALSE	FALSE	FALSE	NA	FALSE	TRUE	FALSE	NA	X	AC-480, AEE-788, Afatinib, BMS-690514, CUDC-101, Dacomitinib, Dacomitinib Anhydrous, JNJ-26483327, Lapatinib, MP-412, Neratinib, Pertuzumab, Poziotinib, Sapitinib, TAK-285, Tesevatinib, Trastuzumab, Tucatinib, Vandetanib, Varlitinib, Zanidatamab, Zenocutuzumab	FALSE
EOC310	MET	gain	intergenic::MET:ENST00000397752:e.3	chr7:116728977::chr7:136802920	fusion_from_unknown	2-3	1	FALSE	FALSE	FALSE	NA	TRUE	TRUE	FALSE	NA	IIIB	Capmatinib, Crizotinib, Tepotinib	FALSE
EOC310	NDUFC2	gain	NDUFC2:amp	NA	amplification	2	26-27	FALSE	TRUE	TRUE	NA	TRUE	TRUE	TRUE	NA	X	Metformin	TRUE
EOC310	PDE4B	gain	DYNLT5:ENST00000282670:e.3::PDE4B:ENST00000341517:e.4	chr1:65955341::chr1:66775440	fusion	4	1	FALSE	FALSE	FALSE	NA	FALSE	TRUE	FALSE	NA	X	Roflumilast	FALSE
EOC310	PDE4D	gain	PDE4D:ENST00000340635:e.2_6del	chr5:59006985_59503354del	frameshift_deletion	1	1	FALSE	FALSE	FALSE	NA	TRUE	TRUE	FALSE	NA	X	Roflumilast	FALSE
EOC310	TP53	loss	TP53:NM_000546.6:exon7:c.686_688del:p.C229_T230delinsS	chr17:7674274GTAC>G	inframe_deletion	NA	NA	FALSE	TRUE	TRUE	NA	TRUE	TRUE	NA	TRUE	IVA	Adavosertib	TRUE
EOC310	YES1	gain	YES1:amp	NA	amplification	3-4	8-9	FALSE	TRUE	TRUE	NA	TRUE	TRUE	TRUE	NA	IVB	Dasatinib	TRUE
EOC312	BRAF	gain	BRAF:ENST00000646891:e.1::RAB19:ENST00000537763:antisense	chr7:140421853::chr7:140907993	truncated_transcripts	2	0	FALSE	FALSE	FALSE	NA	FALSE	TRUE	FALSE	NA	X	Belvarafenib, Binimetinib, Cetuximab, Cobimetinib, Dabrafenib, Encorafenib, Panitumumab, Plixorafenib, Regorafenib, Selumetinib, Sorafenib, Sorafenib Tosylate, Tovorafenib, Trametinib, Vemurafenib	FALSE
EOC312	MRE11	loss	FBXO43:ENST00000428847:antisense::MRE11:ENST00000323929:e.20	chr8:100135907::chr11:94420350	fusion_from_unknown	2	1	FALSE	FALSE	FALSE	NA	TRUE	TRUE	NA	FALSE	IIIA	Talazoparib + Enzalutamide	FALSE
EOC312	NF1	loss	NF1:NM_001042492.3:exon8:c.781A>T:p.K261X	chr17:31182558A>T	stopgain	NA	NA	TRUE	TRUE	FALSE	NA	TRUE	TRUE	NA	TRUE	IIIA	Selumetinib	TRUE
EOC312	PDE4D	gain	PDE4D:ENST00000502484:e.4del	chr5:59212471_59969607del	inframe_deletion	2	0	FALSE	FALSE	FALSE	NA	FALSE	TRUE	FALSE	NA	X	Roflumilast	FALSE
EOC312	PPP5C	gain	ZDHHC20:ENST00000400590:e.1::PPP5C:ENST00000012443:e.2;IGFL4:ENST00000377697:e.0::PPP5C:ENST00000012443:e.3;PPP5C:ENST00000012443:e.2::intergenic;intergenic::PPP5C:ENST00000012443:e.2;PPP5C:ENST00000012443:e.2::PPP5C:ENST00000012443:antisense;PPP5C:ENST00000012443:e.4::PPP5C:ENST00000012443:antisense	chr13:21442248::chr19:46344736;chr19:46066985::chr19:46368643;chr19:46098426::chr19:46360802;chr3:147963226::chr19:46340197;chr19:46368785::chr19:46380357	multiple	7-10	NA	FALSE	FALSE	FALSE	NA	TRUE	TRUE	FALSE	NA	X	LB-100	FALSE
EOC312	PPP5C	gain	PPP5C:amp	NA	amplification	1	7-13	FALSE	FALSE	FALSE	NA	TRUE	FALSE	NA	NA	X	LB-100	FALSE
EOC312	RPS6KB1	gain	BCAS3:ENST00000407086:e.4::RPS6KB1:ENST00000225577:e.2	chr17:59890908::chr17:60696697	fusion	2-3	1-2	FALSE	FALSE	FALSE	NA	TRUE	TRUE	FALSE	NA	X	LY-2584702	FALSE
EOC312	TP53	loss	TP53:NM_000546.6:exon6:c.560-1G>T	chr17:7674972C>A	splicing	NA	NA	TRUE	TRUE	FALSE	NA	TRUE	TRUE	NA	TRUE	IVA	Adavosertib	TRUE
EOC318	ALK	gain	CLIP4:ENST00000320081:antisense::ALK:ENST00000389048:e.5	chr2:29114237::chr2:29462108	fusion_from_unknown	5	1	FALSE	FALSE	FALSE	NA	FALSE	TRUE	FALSE	NA	IIIA	Crizotinib, Alectinib, Brigatinib, Ceritinib, Lorlatinib	FALSE
EOC318	CDK12	loss	CDK12:NM_016507.4:exon2:c.1556dupA:p.T520Nfs*55	chr17:39471387G>GA	frameshift_insertion	NA	NA	TRUE	TRUE	TRUE	NA	TRUE	TRUE	NA	TRUE	IIIA	Olaparib, Talazoparib + Enzalutamide	TRUE
EOC318	EML4	gain	EML4:ENST00000318522:e.11::intergenic	chr2:41525763::chr2:42288648	truncated_transcripts	4	1	TRUE	TRUE	TRUE	NA	FALSE	TRUE	TRUE	NA	X	Alectinib, Ceritinib, Crizotinib, Lorlatinib	TRUE
EOC318	ESR1	gain	ZDHHC14:ENST00000359775:e.1::ESR1:ENST00000206249:e.5;ZDHHC14:ENST00000359775:e.1::ESR1:ENST00000406599:e.2	chr6:152001374::chr6:157495505	fusion	3	0	FALSE	FALSE	FALSE	NA	FALSE	TRUE	FALSE	NA	IIIB	Elacestrant	FALSE
EOC318	FRK	gain	intergenic::FRK:ENST00000606080:e.2	chr6:103968391::chr6:116063999	fusion_from_unknown	3	0	FALSE	FALSE	FALSE	NA	FALSE	TRUE	FALSE	NA	IVB	Dasatinib, Regorafenib	FALSE
EOC318	FYN	gain	FYN:ENST00000354650:e.12::LAMA4:ENST00000230538:e.31	chr6:111691700::chr6:112129808	fusion	4	1	FALSE	FALSE	FALSE	NA	FALSE	TRUE	FALSE	NA	IVB	Dasatinib	FALSE
EOC318	GPD2	gain	MARCHF7:ENST00000409175:e.7::GPD2:ENST00000438166:e.3	chr2:156476513::chr2:159750606	fusion	3	2	FALSE	FALSE	FALSE	NA	FALSE	TRUE	FALSE	NA	X	Metformin	FALSE
EOC318	HDAC9	gain	HDAC9:ENST00000441542:e.5::AHR:ENST00000242057:e.2	chr7:17105725::chr7:18625184	fusion	5	1	FALSE	FALSE	TRUE	NA	FALSE	TRUE	TRUE	NA	X	Belinostat, CUDC-101, Entinostat, Panobinostat	TRUE
EOC318	IL1A	gain	IL1A:ENST00000263339:e.4::INTS5:ENST00000330574:e.2	chr2:112780303::chr11:62661695	fusion	5	0-1	FALSE	FALSE	FALSE	NA	FALSE	TRUE	FALSE	NA	X	Bermekimab	FALSE
EOC318	NBN	loss	intergenic::NBN:ENST00000265433:e.2	chr8:89677571::chr8:89991743	multiple	5-6	1	FALSE	FALSE	FALSE	NA	FALSE	TRUE	NA	FALSE	IIIA	Talazoparib + Enzalutamide	FALSE
EOC318	NDUFA8	gain	NDUFA8:ENST00000373768:e.1_2del	chr9:122150610_122163747del	5prime_deletion	1	1-2	FALSE	FALSE	FALSE	NA	FALSE	TRUE	FALSE	NA	X	Metformin	FALSE
EOC318	NDUFB6	gain	NDUFB6:ENST00000379847:e.3::intergenic	chr9:32556155::chr9:36556544	truncated_transcripts	4	1	TRUE	FALSE	TRUE	NA	FALSE	TRUE	TRUE	NA	X	Metformin	TRUE
EOC318	PIK3CG	gain	PIK3CG:amp	NA	amplification	2	7-8	FALSE	FALSE	FALSE	NA	FALSE	FALSE	NA	NA	X	Apitolisib, BGT-226, Dactolisib, Duvelisib, Gedatolisib, Omipalisib, PF-04691502, Pictilisib, Pilaralisib, SF-1126, Sonolisib, Voxtalisib	FALSE
EOC318	PIK3R3	gain	PIK3R3:ENST00000262741:e.1::AGBL4:ENST00000371839:e.7	chr1:46091164::chr1:48849130	fusion	3	1	TRUE	FALSE	FALSE	NA	FALSE	TRUE	TRUE	NA	X	Apitolisib, BGT-226, Dactolisib, Gedatolisib, Omipalisib, PF-04691502, Pictilisib, Pilaralisib, SF-1126, Sonolisib, Voxtalisib	TRUE
EOC318	PPP2CA	gain	intergenic::PPP2CA:ENST00000481195:e.2	chr5:133856844::chr5:134223978	fusion_from_unknown	3	1	FALSE	FALSE	FALSE	NA	FALSE	TRUE	FALSE	NA	X	LB-100	FALSE
EOC318	PSMB3	gain	EFCAB13:ENST00000331493:e.23::PSMB3:ENST00000619426:e.4	chr17:38756148::chr17:47416436	fusion	3	1	FALSE	FALSE	FALSE	NA	FALSE	TRUE	FALSE	NA	X	Bortezomib, Ixazomib, Ixazomib Citrate, Marizomib, Oprozomib	FALSE
EOC318	PTK2	gain	PTK2:amp	NA	amplification	2-4	7-8	FALSE	TRUE	TRUE	NA	FALSE	TRUE	TRUE	NA	X	Defactinib, GSK-2256098	TRUE
EOC318	ROS1	gain	ROS1:ENST00000368507:e.5::intergenic;DCBLD1:ENST00000338728:e.1::ROS1:ENST00000368507:e.6	chr6:117123122::chr6:117404729;chr6:117186937::chr6:117404729;chr6:117404723::chr6:117491177	multiple	3-4	3-4	TRUE	TRUE	TRUE	NA	TRUE	TRUE	TRUE	NA	IIIA	Crizotinib, Entrectinib, Repotrectinib, Ceritinib, Lorlatinib	TRUE
EOC318	TP53	loss	TP53:NM_000546.6:exon6:c.659A>G:p.Y220C	chr17:7674872T>C	nonsynonymous_SNV	NA	NA	TRUE	TRUE	TRUE	NA	TRUE	TRUE	NA	TRUE	IVA	Rezatapopt	TRUE
EOC318	UBA3	gain	SYNPR:ENST00000478300:antisense::UBA3:ENST00000361055:e.8	chr3:63565233::chr3:69064061	fusion_from_unknown	4	1	FALSE	FALSE	FALSE	NA	TRUE	TRUE	FALSE	NA	X	Pevonedistat	FALSE
EOC319	ADRA1D	gain	ADRA1D:amp	NA	amplification	3	7-8	FALSE	FALSE	FALSE	NA	TRUE	FALSE	NA	NA	X	Carvedilol	FALSE
EOC319	AKT2	gain	AKT2:amp	NA	amplification	3	7	TRUE	FALSE	FALSE	NA	TRUE	TRUE	TRUE	NA	IVB	Capivasertib	TRUE
EOC319	ATP4A	gain	ATP4A:amp	NA	amplification	3	7	FALSE	FALSE	FALSE	NA	TRUE	FALSE	NA	NA	X	Rabeprazole	FALSE
EOC319	AXL	gain	AXL:amp	NA	amplification	3	7	FALSE	FALSE	FALSE	NA	TRUE	FALSE	NA	NA	X	Gilteritinib	FALSE
EOC319	BCL2L1	gain	BCL2L1:amp	NA	amplification	3	8-9	FALSE	FALSE	FALSE	NA	TRUE	FALSE	NA	NA	X	Navitoclax	FALSE
EOC319	CD22	gain	CD22:amp	NA	amplification	3	7	FALSE	FALSE	FALSE	NA	TRUE	TRUE	TRUE	NA	X	Epratuzumab	TRUE
EOC319	CYP3A7	gain	CYP3A7:NM_000765.5:exon1:c.68_71del:p.L24Mfs*65	chr7:99735022CAGAT>C	frameshift_deletion	NA	NA	FALSE	FALSE	FALSE	NA	TRUE	FALSE	FALSE	NA	X	Cobicistat, Ritonavir	FALSE
EOC319	EGFR	gain	FRMPD4:ENST00000675598:e.0::EGFR:ENST00000275493:e.15	chr7:55164189::chrX:11933683	promoter_hijacking	5	0	FALSE	FALSE	FALSE	NA	FALSE	TRUE	FALSE	NA	X	AC-480, AEE-788, Afatinib, Amivantamab, Aumolertinib, BMS-690514, Brigatinib, Cetuximab, CLN-081, CUDC-101, Dacomitinib, Dacomitinib Anhydrous, Erlotinib, Erlotinib Hydrochloride, Gefitinib, JNJ-26483327, Lapatinib, Lazertinib, MP-412, Neratinib, Nimotuzumab, Osimertinib, Panitumumab, Poziotinib, Sapitinib, TAK-285, Tesevatinib, Theliatinib, Vandetanib, Varlitinib	FALSE
EOC319	GSK3A	gain	GSK3A:amp	NA	amplification	3	7	FALSE	FALSE	FALSE	NA	TRUE	FALSE	NA	NA	X	LY-2090314	FALSE
EOC319	HCK	gain	HCK:amp	NA	amplification	3	8-9	FALSE	FALSE	FALSE	NA	TRUE	FALSE	NA	NA	X	Bosutinib, Dasatinib, ENMD-981693, Ilorasertib	FALSE
EOC319	MS4A1	gain	MS4A1:NM_152866.3:exon6:c.350T>A:p.M117K	chr11:60465934T>A	nonsynonymous_SNV	NA	NA	FALSE	FALSE	FALSE	NA	TRUE	FALSE	FALSE	NA	X	Obinutuzumab, Ocaratuzumab, Ofatumumab, Rituximab	FALSE
EOC319	PDGFRB	gain	PDGFRB:ENST00000261799:e.4::CAMK2A:ENST00000671881:e.19	chr5:150134623::chr5:150222117	fusion	3	1	FALSE	FALSE	FALSE	NA	FALSE	TRUE	FALSE	NA	IIIA	Imatinib	FALSE
EOC319	PDGFRB	gain	PDGFRB:NM_002609.4:exon3:c.243C>G:p.F81L	chr5:150135676G>C	nonsynonymous_SNV	NA	NA	FALSE	FALSE	FALSE	NA	TRUE	FALSE	FALSE	NA	X	Catequentinib, Cediranib, CM-082, Crenolanib, Dasatinib, Dovitinib, ENMD-981693, Famitinib, Foretinib, Ilorasertib, Imatinib, Imatinib Mesylate, Pazopanib, Quizartinib, Regorafenib, Sorafenib, Sorafenib Tosylate, Sunitinib, Sunitinib Malate, Vatalanib, XL-820, XL-999	FALSE
EOC319	PSMC4	gain	PSMC4:amp	NA	amplification	3	7	FALSE	FALSE	FALSE	NA	TRUE	TRUE	TRUE	NA	X	Bortezomib, Ixazomib, Ixazomib Citrate, Oprozomib	TRUE
EOC319	PSMD8	gain	PSMD8:amp	NA	amplification	3	7-9	TRUE	FALSE	FALSE	NA	TRUE	TRUE	TRUE	NA	X	Bortezomib, Ixazomib, Ixazomib Citrate, Oprozomib	TRUE
EOC319	TEK	gain	TEK:ENST00000380036:e.1::intergenic	chr9:27146077::chr9:27230263	truncated_transcripts	2	1	FALSE	FALSE	FALSE	NA	FALSE	TRUE	FALSE	NA	X	Altiratinib, CEP-11981, Foretinib, Glesatinib, Regorafenib, Vandetanib	FALSE
EOC319	TP53	loss	TP53:NM_000546.6:exon7:c.673-1G>A	chr17:7674291C>T	splicing	NA	NA	TRUE	FALSE	FALSE	NA	TRUE	TRUE	NA	TRUE	IVA	Adavosertib	TRUE
EOC321	BRAF	gain	BRAF:ENST00000646891:e.13::TMEM178B:ENST00000565468:antisense	chr7:140761753::chr7:141219454	truncated_transcripts	2	1	FALSE	FALSE	FALSE	NA	FALSE	TRUE	FALSE	NA	X	Belvarafenib, Binimetinib, Cetuximab, Cobimetinib, Dabrafenib, Encorafenib, Panitumumab, Plixorafenib, Regorafenib, Selumetinib, Sorafenib, Sorafenib Tosylate, Tovorafenib, Trametinib, Vemurafenib	FALSE
EOC321	BRCA1	loss	intergenic::BRCA1:ENST00000357654:e.19	chr12:4974626::chr17:43061369	fusion_from_unknown	1	2	FALSE	FALSE	FALSE	NA	TRUE	TRUE	NA	FALSE	IA	Niraparib, Olaparib, Olaparib + Bevacizumab, Rucaparib	FALSE
EOC321	ERBB2	gain	intergenic::ERBB2:ENST00000269571:e.2	chr17:39587378::chr17:39688103	fusion_from_unknown	13	12-14	FALSE	FALSE	FALSE	NA	TRUE	TRUE	FALSE	NA	IIIB	Ado-Trastuzumab Emtansine, Lapatinib + Capecitabine, Lapatinib + Letrozole, Margetuximab + Chemotherapy, Neratinib, Neratinib + Capecitabine, Trastuzumab, Trastuzumab + Chemotherapy, Trastuzumab + Pertuzumab + Chemotherapy, Trastuzumab + Tucatinib + Capecitabine, Trastuzumab Deruxtecan, Tucatinib + Trastuzumab, Pembrolizumab + Trastuzumab + Chemotherapy, Trastuzumab + Pertuzumab, Lapatinib + Tras…	FALSE
EOC321	ERBB2	gain	ERBB2:amp	NA	amplification	0-7	7-16	FALSE	TRUE	FALSE	NA	TRUE	TRUE	TRUE	NA	IIIA	Ado-Trastuzumab Emtansine, Lapatinib + Capecitabine, Lapatinib + Letrozole, Margetuximab + Chemotherapy, Neratinib, Neratinib + Capecitabine, Trastuzumab, Trastuzumab + Chemotherapy, Trastuzumab + Pertuzumab + Chemotherapy, Trastuzumab + Tucatinib + Capecitabine, Trastuzumab Deruxtecan, Tucatinib + Trastuzumab, Pembrolizumab + Trastuzumab + Chemotherapy, Trastuzumab + Pertuzumab, Lapatinib + Tras…	TRUE
EOC321	NF1	loss	NF1:ENST00000358273:e.31_56del	chr17:31249844_31359760del	inframe_deletion	0	1	TRUE	TRUE	FALSE	NA	TRUE	TRUE	NA	TRUE	IIIA	Selumetinib	TRUE
EOC321	PDE4D	gain	PDE4D:ENST00000502484:e.3dup	chr5:59888295_60014082dup	frameshift_duplication	1	1	FALSE	FALSE	FALSE	NA	TRUE	TRUE	FALSE	NA	X	Roflumilast	FALSE
EOC321	PTK2B	gain	SCARA5:ENST00000354914:antisense::PTK2B:ENST00000346049:e.24	chr8:27444992::chr8:27921995	fusion_from_unknown	2	1	FALSE	FALSE	FALSE	NA	TRUE	TRUE	FALSE	NA	X	Defactinib	FALSE
EOC321	TP53	loss	TP53:NM_000546.6:exon7:c.713G>T:p.C238F	chr17:7674250C>A	nonsynonymous_SNV	NA	NA	TRUE	TRUE	FALSE	NA	TRUE	TRUE	NA	TRUE	IVA	Adavosertib	TRUE
EOC321	XPO1	gain	XPO1:ENST00000401558:e.2::intergenic	chr2:61529501::chr2:62284498	truncated_transcripts	2	0-1	FALSE	FALSE	FALSE	NA	TRUE	FALSE	TRUE	NA	X	Selinexor	FALSE
EOC323	ADRM1	gain	ADRM1:amp	NA	amplification	3-4	5-6	FALSE	FALSE	FALSE	NA	TRUE	FALSE	NA	NA	X	Bortezomib, Ixazomib, Ixazomib Citrate, Oprozomib	FALSE
EOC323	AURKA	gain	AURKA:amp	NA	amplification	3-4	5-6	FALSE	FALSE	FALSE	NA	TRUE	FALSE	NA	NA	X	Alisertib, AMG-900, ENMD-2076, ENMD-981693, Ilorasertib, Tozasertib	FALSE
EOC323	BCL2	gain	intergenic::BCL2:ENST00000333681:e.3	chr18:62998313::chr18:63203030	fusion_from_unknown	2	1	FALSE	FALSE	FALSE	NA	TRUE	TRUE	FALSE	NA	X	Navitoclax, Venetoclax	FALSE
EOC323	CYP3A5	gain	CYP3A5:NM_000777.5:exon11:c.1243C>T:p.R415C	chr7:99652563G>A	nonsynonymous_SNV	NA	NA	FALSE	FALSE	FALSE	NA	TRUE	FALSE	TRUE	NA	X	Cobicistat, Ritonavir	FALSE
EOC323	EPHA3	gain	EPHA3:ENST00000336596:antisense::EPHA3:ENST00000336596:e.6	chr3:89376815::chr3:89380116	fusion_from_unknown	2	1	FALSE	FALSE	FALSE	NA	FALSE	TRUE	FALSE	NA	IVB	Vandetanib	FALSE
EOC323	EPHA5	gain	EPHA5:ENST00000613740:e.3::CAPN13:ENST00000295055:e.2;EPHA5:ENST00000613740:e.11del	chr2:30802697::chr4:65572515;chr4:65364814_65365491del	multiple	2	2	FALSE	FALSE	FALSE	NA	TRUE	TRUE	FALSE	NA	IVB	Vandetanib	FALSE
EOC323	HDAC6	gain	HDAC6:NM_006044.4:exon25:c.2766G>C:p.Q922H	chrX:48823165G>C	nonsynonymous_SNV	NA	NA	FALSE	FALSE	FALSE	NA	TRUE	FALSE	FALSE	NA	X	Belinostat, CUDC-101, Entinostat, Panobinostat, Vorinostat	FALSE
EOC323	IGF1	gain	IGF1:ENST00000337514:e.2::IGF1:ENST00000337514:antisense;IGF1:ENST00000337514:antisense::IGF1:ENST00000337514:e.4;IGF1:ENST00000337514:antisense::IGF1:ENST00000337514:e.3	chr12:102467829::chr12:102525954;chr12:102409262::chr12:102467830	multiple	1	2	FALSE	FALSE	FALSE	NA	TRUE	TRUE	FALSE	NA	X	Dusigitumab	FALSE
EOC323	NRG1	gain	DIS3L2:ENST00000325385:e.6::NRG1:ENST00000356819:e.6	chr2:232113335::chr8:32648247	fusion	2	1	FALSE	TRUE	TRUE	NA	TRUE	TRUE	TRUE	NA	II	Zenocutuzumab	TRUE
EOC323	PARP1	gain	PARP1:ENST00000366794:e.10del	chr1:226380063_226380105del	inframe_deletion	1	1	FALSE	FALSE	FALSE	NA	FALSE	TRUE	FALSE	NA	IVB	Niraparib, Olaparib, Rucaparib, Talazoparib	FALSE
EOC323	PARP1	gain	PARP1:NM_001618.4:exon10:c.1361_1401del:p.V454Efs*24	chr1:226380063TCTTGGTGGAGGCGGAGACGTCCTGGAGGAAGTCCTCAGACA>T	frameshift_deletion	NA	NA	FALSE	FALSE	FALSE	NA	FALSE	FALSE	FALSE	NA	X	Niraparib, Olaparib, Pamiparib, Rucaparib, Senaparib, Talazoparib, Veliparib	FALSE
EOC323	PCSK9	gain	PCSK9:ENST00000302118:e.5::intergenic	chr1:55053831::chr10:92771434	truncated_transcripts	4	0	FALSE	FALSE	FALSE	NA	FALSE	TRUE	FALSE	NA	X	Ongericimab	FALSE
EOC323	PDE4C	gain	PDE4C:NM_001098818.4:exon15:c.1810A>T:p.S604C	chr19:18211162T>A	nonsynonymous_SNV	NA	NA	FALSE	FALSE	FALSE	NA	TRUE	FALSE	FALSE	NA	X	Roflumilast	FALSE
EOC323	PDE4D	gain	MACC1:ENST00000400331:antisense::PDE4D:ENST00000340635:e.2	chr5:60380063::chr7:20153192	fusion_from_unknown	2	1	FALSE	FALSE	FALSE	NA	TRUE	TRUE	FALSE	NA	X	Roflumilast	FALSE
EOC323	PDE4D	gain	PDE4D:NM_001104631.2:exon15:c.2017G>T:p.G673C	chr5:58975077C>A	nonsynonymous_SNV	NA	NA	FALSE	FALSE	TRUE	NA	TRUE	TRUE	TRUE	NA	X	Roflumilast	TRUE
EOC323	PDGFB	gain	PDGFB:amp	NA	amplification	2-3	5-6	FALSE	FALSE	FALSE	NA	TRUE	FALSE	NA	NA	X	Imatinib	FALSE
EOC323	PDGFRA	gain	intergenic::PDGFRA:ENST00000257290:e.8;PDGFRA:ENST00000257290:e.7::intergenic	chr4:54268059::chr20:55965181;chr4:54268037::chr20:55965193	balanced_translocation	2	1	FALSE	FALSE	FALSE	NA	TRUE	TRUE	FALSE	NA	IIIA	Imatinib	FALSE
EOC323	PIK3CA	gain	PIK3CA:NM_006218.4:exon16:c.2356C>G:p.P786A	chr3:179224761C>G	nonsynonymous_SNV	NA	NA	FALSE	FALSE	FALSE	NA	TRUE	FALSE	TRUE	NA	X	Alpelisib, Apitolisib, BGT-226, Capivasertib, Dactolisib, Fulvestrant, Gedatolisib, Inavolisib, Omipalisib, Palbociclib, PF-04691502, Pictilisib, Pilaralisib, Serabelisib, SF-1126, Sonolisib, Voxtalisib	FALSE
EOC323	PIK3R3	gain	PIK3R3:NM_003629.4:exon9:c.1058_1092del:p.Y353Sfs*13	chr1:46046012GATTGATATCCTCAACAAACCAGGTTTTCTCATCAT>G	frameshift_deletion	NA	NA	FALSE	FALSE	FALSE	NA	TRUE	FALSE	FALSE	NA	X	Apitolisib, BGT-226, Dactolisib, Gedatolisib, Omipalisib, PF-04691502, Pictilisib, Pilaralisib, SF-1126, Sonolisib, Voxtalisib	FALSE
EOC323	PIK3R3	gain	PIK3R3:ENST00000262741:e.9del	chr1:46046012_46046048del	inframe_deletion	0-1	2	FALSE	FALSE	FALSE	NA	TRUE	TRUE	FALSE	NA	X	Apitolisib, BGT-226, Dactolisib, Gedatolisib, Omipalisib, PF-04691502, Pictilisib, Pilaralisib, SF-1126, Sonolisib, Voxtalisib	FALSE
EOC323	PSMA7	gain	PSMA7:amp	NA	amplification	3-4	5-6	FALSE	FALSE	FALSE	NA	TRUE	FALSE	NA	NA	X	Bortezomib, Ixazomib, Ixazomib Citrate, Marizomib, Oprozomib	FALSE
EOC323	PTEN	loss	PTEN:ENST00000371953:e.1::PTEN:ENST00000371953:antisense;PTEN:ENST00000371953:e.2::PTEN:ENST00000371953:antisense	chr10:87867581::chr10:87908772	truncated_transcripts	0	2-3	FALSE	FALSE	FALSE	NA	TRUE	FALSE	NA	TRUE	X	AZD-8186, Capivasertib, Fulvestrant, GSK-2636771	FALSE
EOC323	PTK2	gain	PTK2:amp	NA	amplification	3-4	5-6	FALSE	TRUE	TRUE	NA	TRUE	TRUE	TRUE	NA	X	Defactinib, GSK-2256098	TRUE
EOC323	PTK6	gain	PTK6:amp	NA	amplification	3-4	5-6	FALSE	FALSE	FALSE	NA	TRUE	FALSE	NA	NA	X	Vandetanib	FALSE
EOC323	RAD51C	loss	RAD51C:NM_058216.3:exon1:c.90delG:p.F32Sfs*8	NA	germline	NA	NA	NA	NA	NA	NA	NA	TRUE	NA	TRUE	IIIA	Olaparib, Talazoparib + Enzalutamide	TRUE
EOC323	SRMS	gain	SRMS:amp	NA	amplification	3-4	5-6	FALSE	FALSE	FALSE	NA	TRUE	FALSE	NA	NA	X	Dasatinib, ENMD-981693, Ilorasertib	FALSE
EOC323	TP53	loss	TP53:NM_000546.6:exon4:c.329G>T:p.R110L	chr17:7676040C>A	nonsynonymous_SNV	NA	NA	FALSE	TRUE	TRUE	NA	TRUE	TRUE	NA	TRUE	IVA	Adavosertib	TRUE
EOC323	TSC2	loss	TSC2:ENST00000219476:e.27::intergenic	chr16:1906550::chr16:2079258	truncated_transcripts	5	0	FALSE	FALSE	FALSE	NA	FALSE	TRUE	NA	FALSE	IIIA	Everolimus	FALSE
EOC326	ABL1	gain	ABL1:ENST00000318560:e.9del	chr9:130878568_130880069del;chr9:130880156_130880499del	multiple	2	1	FALSE	FALSE	FALSE	NA	FALSE	TRUE	FALSE	NA	IIIB	Dasatinib, Imatinib, Ponatinib, Asciminib, Bosutinib, Nilotinib	FALSE
EOC326	ADRA1A	gain	ADRA1A:ENST00000380573:e.2::DIP2A:ENST00000417564:antisense	chr8:26836225::chr21:46486760	truncated_transcripts	1	1	FALSE	FALSE	FALSE	NA	FALSE	FALSE	FALSE	NA	X	Carvedilol	FALSE
EOC326	ALK	gain	ALK:ENST00000389048:e.6::PPP1CB:ENST00000395366:antisense;ALK:ENST00000389048:e.3::ALK:ENST00000389048:antisense;ALK:ENST00000389048:e.1::ALK:ENST00000389048:antisense;ALK:ENST00000389048:antisense::ALK:ENST00000389048:e.4	chr2:28765908::chr2:29326854;chr2:29615827::chr2:29879730;chr2:29625386::chr2:29625580	multiple	5-8	0	FALSE	FALSE	FALSE	NA	FALSE	TRUE	FALSE	NA	IIIA	Crizotinib, Alectinib, Brigatinib, Ceritinib, Lorlatinib	FALSE
EOC326	ALK	gain	ALK:amp	NA	amplification	2-3	2-7	FALSE	FALSE	FALSE	NA	FALSE	FALSE	NA	NA	X	Alectinib, ASP-3026, Brigatinib, Ceritinib, Crizotinib, Entrectinib, Lorlatinib	FALSE
EOC326	ARID1A	loss	ARID1A:NM_006015.6:exon1:c.791C>A:p.S264X	chr1:26697194C>A	stopgain	NA	NA	FALSE	FALSE	FALSE	NA	FALSE	TRUE	NA	FALSE	IVA	PLX2853, Tazemetostat	FALSE
EOC326	CD3D	gain	CD3D:ENST00000300692:e.1del	chr11:118340594_118342554del	inframe_deletion	3	0	FALSE	FALSE	FALSE	NA	FALSE	TRUE	FALSE	NA	X	Catumaxomab, Teclistamab	FALSE
EOC326	DDB1	gain	DDB1:ENST00000301764:e.15_16del	chr11:61313706_61313862del	frameshift_deletion	2	0	FALSE	FALSE	FALSE	NA	FALSE	TRUE	FALSE	NA	X	Lenalidomide, Thalidomide	FALSE
EOC326	EPHA6	gain	EPHA6:NM_001080448.3:exon1:c.290G>C:p.G97A	chr3:96814913G>C	nonsynonymous_SNV	NA	NA	FALSE	FALSE	FALSE	NA	TRUE	FALSE	TRUE	NA	X	Vandetanib	FALSE
EOC326	EPHA7	gain	EPHA7:NM_004440.4:exon11:c.2024A>G:p.Q675R	chr6:93258185T>C	nonsynonymous_SNV	NA	NA	FALSE	FALSE	FALSE	NA	FALSE	TRUE	FALSE	NA	IVB	Vandetanib	FALSE
EOC326	ESR2	gain	ESR2:ENST00000341099:e.8::RTN1:ENST00000267484:e.4	chr14:59645105::chr14:64233442	fusion	1	1	FALSE	FALSE	FALSE	NA	FALSE	TRUE	FALSE	NA	IVB	Fulvestrant	FALSE
EOC326	F10	gain	F10:NM_000504.4:exon8:c.884A>G:p.Q295R	chr13:113148934A>G	nonsynonymous_SNV	NA	NA	FALSE	FALSE	FALSE	NA	FALSE	FALSE	FALSE	NA	X	Apixaban, Rivaroxaban	FALSE
EOC326	FN1	gain	FN1:ENST00000354785:e.45_46del;FN1:ENST00000354785:e.44_45del;FN1:ENST00000354785:e.43_44del;FN1:ENST00000354785:e.43del;FN1:ENST00000354785:e.41_42del;FN1:ENST00000354785:e.40del;FN1:ENST00000354785:e.39del;FN1:ENST00000354785:e.38_39del;FN1:ENST00000354785:e.37_38del;FN1:ENST00000354785:e.36_37del;FN1:ENST00000354785:e.35_36del;FN1:ENST00000354785:e.35del;FN1:ENST00000354785:e.32_34del;FN1:ENST…	chr2:215361626_215361969del;chr2:215362079_215364879del;chr2:215364985_215365505del;chr2:215365629_215367862del;chr2:215368027_215370294del;chr2:215370433_215371910del;chr2:215372376_215373323del;chr2:215373411_215375214del;chr2:215375393_215375629del;chr2:215375718_215376498del;chr2:215376674_215378175del;chr2:215378261_215379129del;chr2:215379317_215382212del;chr2:215379319_215380813del;chr2:21…	multiple	4	NA	FALSE	FALSE	FALSE	NA	FALSE	TRUE	FALSE	NA	X	L19SIP 131I	FALSE
EOC326	FNTB	gain	intergenic::FNTB:ENST00000246166:e.12	chr9:75222396::chr14:65060139	fusion_from_unknown	1	1	FALSE	FALSE	FALSE	NA	FALSE	TRUE	FALSE	NA	IVB	Tipifarnib	FALSE
EOC326	HSP90AB1	gain	HSP90AB1:NM_007355.4:exon9:c.1462delG:p.G488Vfs*26	chr6:44251883TGGTGCGTTGACTCTGATTGAAGCCTTTTTGGAGGAGTGGGGAGCACAATTAGGGCTTCCTGGGAACTGGCAGTATGAGGCATTTTAGTCACTGAGTTCATTTAATTACCCTACA>T	frameshift_deletion	NA	NA	FALSE	FALSE	FALSE	NA	TRUE	FALSE	FALSE	NA	X	Retaspimycin, Retaspimycin Hydrochloride, SNX 5422, Tanespimycin	FALSE
EOC326	IDH2	gain	IDH2:ENST00000330062:e.8_9del;IDH2:ENST00000330062:e.7_8del;IDH2:ENST00000330062:e.7del;IDH2:ENST00000330062:e.2del;IDH2:ENST00000330062:e.1_2del	chr15:90085098_90085275del;chr15:90085387_90087112del;chr15:90087262_90087438del;chr15:90090645_90091554del;chr15:90091644_90102276del	multiple	2	NA	FALSE	FALSE	FALSE	NA	FALSE	TRUE	FALSE	NA	IIIB	Enasidenib, Vorasidenib	FALSE
EOC326	IDO1	gain	IDO1:amp	NA	amplification	0	4-31	FALSE	FALSE	FALSE	NA	FALSE	FALSE	NA	NA	X	Linrodostat	FALSE
EOC326	IDO1	gain	PITRM1:ENST00000224949:antisense::IDO1:ENST00000518237:e.2	chr8:39910564::chr10:3139914	fusion_from_unknown	12-27	0-1	FALSE	FALSE	FALSE	NA	FALSE	TRUE	FALSE	NA	X	Linrodostat	FALSE
EOC326	IGF2	gain	IGF2:ENST00000416167:e.3_4del;IGF2:ENST00000416167:e.3del;IGF2:ENST00000416167:e.1del	chr11:2133223_2133517del;chr11:2133664_2135366del;chr11:2135531_2138231del	multiple	1	NA	FALSE	FALSE	FALSE	NA	FALSE	TRUE	FALSE	NA	X	Dusigitumab	FALSE
EOC326	JAK2	gain	VWA8:ENST00000379310:e.37::JAK2:ENST00000381652:e.20	chr9:5089020::chr13:41645250	fusion	2	0	FALSE	FALSE	FALSE	NA	FALSE	TRUE	FALSE	NA	IIIA	Fedratinib, Ruxolitinib	FALSE
EOC326	KDR	gain	KDR:ENST00000263923:e.26del;KDR:ENST00000263923:e.9_10del;KDR:ENST00000263923:e.6del	chr4:55087759_55088869del;chr4:55088971_55089372del;chr4:55107893_55110403del;chr4:55113482_55114127del	multiple	2	NA	FALSE	FALSE	FALSE	NA	FALSE	TRUE	FALSE	NA	IVB	Cabozantinib, Fexagratinib, Pazopanib, Regorafenib, Sorafenib, Sunitinib, Vandetanib	FALSE
EOC326	NDUFA1	gain	NDUFA1:ENST00000371437:e.1del;NDUFA1:ENST00000371437:e.2del	chrX:119872012_119873303del;chrX:119873392_119876513del	multiple	1	0	FALSE	FALSE	FALSE	NA	FALSE	TRUE	FALSE	NA	X	Metformin	FALSE
EOC326	NDUFA13	gain	NDUFA13:ENST00000507754:e.1_2del;NDUFA13:ENST00000507754:e.2del;NDUFA13:ENST00000507754:e.3del	chr19:19516332_19526182del;chr19:19526259_19527280del;chr19:19527351_19527700del	multiple	3	NA	FALSE	FALSE	FALSE	NA	FALSE	TRUE	FALSE	NA	X	Metformin	FALSE
EOC326	NDUFB2	gain	NDUFB2:ENST00000247866:e.1_2del;NDUFB2:ENST00000247866:e.2_3del	chr7:140696842_140702866del;chr7:140703010_140704860del	multiple	3	1	FALSE	FALSE	FALSE	NA	FALSE	TRUE	FALSE	NA	X	Metformin	FALSE
EOC326	NDUFB7	gain	NDUFB7:ENST00000215565:e.2_3del	chr19:14566265_14566769del	inframe_deletion	1	1	FALSE	FALSE	FALSE	NA	FALSE	TRUE	FALSE	NA	X	Metformin	FALSE
EOC326	NDUFB8	gain	NDUFB8:ENST00000299166:e.3del;NDUFB8:ENST00000299166:e.1del	chr10:100527073_100529379del;chr10:100529507_100529768del	multiple	3	1	FALSE	FALSE	FALSE	NA	FALSE	TRUE	FALSE	NA	X	Metformin	FALSE
EOC326	NDUFB9	gain	NDUFB9:ENST00000276689:e.1del	chr8:124539286_124543086del	inframe_deletion	2	0	FALSE	FALSE	FALSE	NA	FALSE	TRUE	FALSE	NA	X	Metformin	FALSE
EOC326	NDUFC2	gain	NDUFC2:ENST00000281031:e.1del	chr11:78073142_78079592del	inframe_deletion	3	0	FALSE	FALSE	FALSE	NA	FALSE	TRUE	FALSE	NA	X	Metformin	FALSE
EOC326	NDUFS2	gain	NDUFS2:ENST00000676972:e.3del;NDUFS2:ENST00000676972:e.8_9del;NDUFS2:ENST00000676972:e.10_11del;NDUFS2:ENST00000676972:e.12del;NDUFS2:ENST00000676972:e.13_14del	chr1:161206596_161209192del;chr1:161210389_161210595del;chr1:161212480_161213647del;chr1:161213725_161213863del;chr1:161213921_161214156del	multiple	2	NA	FALSE	FALSE	FALSE	NA	FALSE	TRUE	FALSE	NA	X	Metformin	FALSE
EOC326	NDUFS7	gain	NDUFS7:ENST00000233627:e.4_5del	chr19:1388938_1390877del	frameshift_deletion	2	0	FALSE	FALSE	FALSE	NA	FALSE	TRUE	FALSE	NA	X	Metformin	FALSE
EOC326	NDUFS8	gain	NDUFS8:ENST00000313468:e.5del	chr11:68033282_68036252del	frameshift_deletion	2	0	FALSE	FALSE	FALSE	NA	FALSE	TRUE	FALSE	NA	X	Metformin	FALSE
EOC326	NDUFV1	gain	NDUFV1:ENST00000322776:e.7_8del;NDUFV1:ENST00000322776:e.8del	chr11:67611569_67611900del;chr11:67611973_67612119del	multiple	2	1	FALSE	FALSE	FALSE	NA	FALSE	TRUE	FALSE	NA	X	Metformin	FALSE
EOC326	NRG1	gain	intergenic::NRG1:ENST00000405005:e.2;intergenic::NRG1:ENST00000405005:e.6	chr8:32091592::chrX:79562118;chr8:32658429::chr21:19547087	multiple	1	0	FALSE	FALSE	FALSE	NA	FALSE	TRUE	FALSE	NA	II	Zenocutuzumab	FALSE
EOC326	PPP2R1A	loss	PPP2R1A:NM_014225.6:exon4:c.415G>T:p.D139Y	chr19:52211404G>T	nonsynonymous_SNV	NA	NA	FALSE	FALSE	FALSE	NA	TRUE	TRUE	NA	FALSE	IVA	Lunresertib + Camonsertib	FALSE
EOC326	PPP2R1A	loss	PPP2R1A:ENST00000322088:e.7del;PPP2R1A:ENST00000322088:e.8del;PPP2R1A:ENST00000322088:e.9del;PPP2R1A:ENST00000322088:e.10_11del;PPP2R1A:ENST00000322088:e.11del	chr19:52215892_52216003del;chr19:52216073_52216528del;chr19:52216662_52219690del;chr19:52219864_52220189del;chr19:52220248_52220978del	multiple	2	NA	FALSE	FALSE	FALSE	NA	FALSE	TRUE	NA	FALSE	IVA	Lunresertib + Camonsertib	FALSE
EOC326	PSMA5	gain	PSMA5:ENST00000271308:e.8del;PSMA5:ENST00000271308:e.7del	chr1:109402091_109409929del;chr1:109410016_109411013del	multiple	3	0	FALSE	FALSE	FALSE	NA	FALSE	TRUE	FALSE	NA	X	Bortezomib, Ixazomib, Ixazomib Citrate, Marizomib, Oprozomib	FALSE
EOC326	PSMA7	gain	PSMA7:ENST00000370873:e.6del;PSMA7:ENST00000370873:e.4_5del;PSMA7:ENST00000370873:e.3del;PSMA7:ENST00000370873:e.2del	chr20:62136950_62137365del;chr20:62137425_62138170del;chr20:62138290_62139075del;chr20:62139198_62139782del;chr20:62139907_62140820del;chr20:62140943_62143207del	multiple	4	NA	FALSE	FALSE	FALSE	NA	FALSE	TRUE	FALSE	NA	X	Bortezomib, Ixazomib, Ixazomib Citrate, Marizomib, Oprozomib	FALSE
EOC326	PSMB1	gain	PSMB1:ENST00000262193:e.3del;PSMB1:ENST00000262193:e.2_3del	chr6:170543731_170546104del;chr6:170546184_170549006del	multiple	2	0	FALSE	FALSE	FALSE	NA	FALSE	TRUE	FALSE	NA	X	Bortezomib, Ixazomib, Ixazomib Citrate, Marizomib, Oprozomib	FALSE
EOC326	PSMB4	gain	PSMB4:ENST00000290541:e.4del	chr1:151400844_151401238del	frameshift_deletion	8	0	FALSE	FALSE	FALSE	NA	FALSE	TRUE	FALSE	NA	X	Bortezomib, Ixazomib, Ixazomib Citrate, Marizomib, Oprozomib	FALSE
EOC326	PSMB4	gain	PSMB4:amp	NA	amplification	2-3	4-7	TRUE	TRUE	FALSE	NA	FALSE	TRUE	TRUE	NA	X	Bortezomib, Ixazomib, Ixazomib Citrate, Marizomib, Oprozomib	TRUE
EOC326	PSMD4	gain	PSMD4:amp	NA	amplification	2-3	4-7	TRUE	TRUE	FALSE	NA	FALSE	TRUE	TRUE	NA	X	Bortezomib, Ixazomib, Ixazomib Citrate, Oprozomib	TRUE
EOC326	PSMD8	gain	PSMD8:ENST00000215071:e.5del	chr19:38380998_38382116del	frameshift_deletion	2	0	FALSE	FALSE	FALSE	NA	FALSE	TRUE	FALSE	NA	X	Bortezomib, Ixazomib, Ixazomib Citrate, Oprozomib	FALSE
EOC326	PTGS2	gain	PTGS2:amp	NA	amplification	2-3	3-6	FALSE	FALSE	FALSE	NA	FALSE	FALSE	NA	NA	X	Celecoxib	FALSE
EOC326	SRSF2	loss	SRSF2:ENST00000359995:e.1del	chr17:76736467_76736802del	inframe_deletion	2	0	FALSE	FALSE	FALSE	NA	FALSE	TRUE	NA	FALSE	IVA	Ceralasertib	FALSE
EOC326	TNFRSF17	gain	TNFRSF17:amp	NA	amplification	2-4	5-11	FALSE	FALSE	FALSE	NA	FALSE	FALSE	NA	NA	X	Teclistamab	FALSE
EOC326	TP53	loss	TP53:NM_000546.6:exon6:c.578A>G:p.H193R	chr17:7674953T>C	nonsynonymous_SNV	NA	NA	TRUE	TRUE	TRUE	NA	TRUE	TRUE	NA	TRUE	IVA	Adavosertib	TRUE
EOC330	ABL1	gain	ABL1:NM_005157.6:exon3:c.461G>C:p.S154T	chr9:130855008G>C	nonsynonymous_SNV	NA	NA	FALSE	TRUE	FALSE	NA	TRUE	TRUE	TRUE	NA	IIIB	Dasatinib, Imatinib, Ponatinib, Asciminib, Bosutinib, Nilotinib	TRUE
EOC330	CCDC6	gain	CCDC6:ENST00000263102:e.1del	chr10:59896123_59907297del	5prime_deletion	2	1	FALSE	FALSE	FALSE	NA	TRUE	TRUE	FALSE	NA	X	Pralsetinib, Selpercatinib	FALSE
EOC330	COL4A4	gain	COL4A4:NM_000092.5:exon2:c.47C>A:p.T16N	chr2:227147437G>T	nonsynonymous_SNV	NA	NA	FALSE	FALSE	FALSE	NA	TRUE	FALSE	FALSE	NA	X	TRC-093	FALSE
EOC330	CSF1R	gain	CSF1R:ENST00000675795:e.14del	chr5:150059724_150059761del	frameshift_deletion	1	1	FALSE	FALSE	FALSE	NA	TRUE	TRUE	FALSE	NA	X	AMG-820, Cabiralizumab, Elzovantinib, Emactuzumab, ENMD-2076, Fexagratinib, Pazopanib, Quizartinib, Sunitinib, Sunitinib Malate, Vatalanib	FALSE
EOC330	CSF1R	gain	CSF1R:NM_001288705.3:exon14:c.2073_2108del:p.Q691_I702del	chr5:150059723GTGGATGTTCTTATAGTCGACGCCTCCCTCGGGGTCC>G	inframe_deletion	NA	NA	FALSE	FALSE	FALSE	NA	TRUE	TRUE	FALSE	NA	IVB	Elzovantinib, Fexagratinib, Pazopanib, Quizartinib, Sunitinib	FALSE
EOC330	EPHA6	gain	EPHA6:NM_001080448.3:exon11:c.2245A>T:p.K749X	chr3:97532402A>T	stopgain	NA	NA	FALSE	FALSE	FALSE	NA	TRUE	FALSE	FALSE	NA	X	Vandetanib	FALSE
EOC330	EPHB2	gain	EPHB2:ENST00000374630:e.6del	chr1:22881641_22890808del	frameshift_deletion	1	1	FALSE	FALSE	FALSE	NA	TRUE	TRUE	FALSE	NA	X	Vandetanib	FALSE
EOC330	FGFR1	gain	FGFR1:NM_023110.3:exon18:c.2351G>T:p.R784L	chr8:38413746C>A	nonsynonymous_SNV	NA	NA	FALSE	TRUE	FALSE	NA	TRUE	TRUE	TRUE	NA	IIIB	Pemigatinib	TRUE
EOC330	NDUFB6	gain	NDUFB6:ENST00000379847:e.1_2del	chr9:32560843_32577641del	5prime_deletion	1	1	FALSE	FALSE	FALSE	NA	TRUE	TRUE	FALSE	NA	X	Metformin	FALSE
EOC330	NRG1	gain	intergenic::NRG1:ENST00000405005:e.2	chr8:31862667::chr21:34757623	fusion_from_unknown	1	1	FALSE	FALSE	FALSE	NA	TRUE	TRUE	FALSE	NA	II	Zenocutuzumab	FALSE
EOC330	RAD51C	loss	RAD51C:NM_058216.3:exon1:c.90delG:p.F32Sfs*8	NA	germline	NA	NA	NA	NA	NA	NA	NA	TRUE	NA	TRUE	IIIA	Olaparib, Talazoparib + Enzalutamide	TRUE
EOC330	TP53	loss	TP53:NM_000546.6:exon7:c.733G>A:p.G245S	chr17:7674230C>T	nonsynonymous_SNV	NA	NA	FALSE	TRUE	FALSE	NA	TRUE	TRUE	NA	TRUE	IVA	Adavosertib	TRUE
EOC332	ADRA1B	gain	intergenic::ADRA1B:ENST00000306675:e.2	chr5:136634715::chr5:159879792	fusion_from_unknown	2	2	FALSE	FALSE	FALSE	NA	TRUE	TRUE	FALSE	NA	X	Carvedilol	FALSE
EOC332	AXL	gain	intergenic::AXL:ENST00000301178:e.15	chr15:25321632::chr19:41250357	fusion_from_unknown	6	0	FALSE	FALSE	FALSE	NA	FALSE	TRUE	FALSE	NA	IVB	Gilteritinib	FALSE
EOC332	BRCA1	loss	BRCA1:ENST00000357654:e.19::BRCA1:ENST00000357654:antisense	chr17:43054770::chr17:43056530	truncated_transcripts	1	1	FALSE	FALSE	FALSE	NA	TRUE	TRUE	NA	FALSE	IA	Niraparib, Olaparib, Olaparib + Bevacizumab, Rucaparib	FALSE
EOC332	CCNE1	gain	CCNE1:amp	NA	amplification	1	11-12	FALSE	FALSE	FALSE	NA	TRUE	TRUE	TRUE	NA	IVA	Lunresertib + Camonsertib	TRUE
EOC332	CSF1R	gain	intergenic::CSF1R:ENST00000675795:e.2	chr5:150101234::chr19:41487524	fusion_from_unknown	2-3	2	FALSE	FALSE	FALSE	NA	TRUE	TRUE	FALSE	NA	IVB	Elzovantinib, Fexagratinib, Pazopanib, Quizartinib, Sunitinib	FALSE
EOC332	FGFR1	gain	FGFR1:NM_023110.3:exon17:c.2263G>T:p.D755Y	chr8:38413947C>A	nonsynonymous_SNV	NA	NA	FALSE	FALSE	FALSE	NA	TRUE	TRUE	FALSE	NA	IIIB	Pemigatinib	FALSE
EOC332	GRIN2C	gain	GRIN2C:amp	NA	amplification	0	11	FALSE	FALSE	FALSE	NA	TRUE	FALSE	NA	NA	X	Memantine	FALSE
EOC332	GRIN2D	gain	MACROH2A1:ENST00000511689:e.5::GRIN2D:ENST00000263269:e.4	chr5:135354570::chr19:48399853	fusion	1	2	FALSE	FALSE	FALSE	NA	TRUE	TRUE	FALSE	NA	X	Memantine	FALSE
EOC332	IDO1	gain	ARSB:ENST00000264914:e.4::IDO1:ENST00000518237:e.2	chr5:78903373::chr8:39910189	fusion	4-5	1-2	FALSE	FALSE	FALSE	NA	TRUE	TRUE	FALSE	NA	X	Linrodostat	FALSE
EOC332	NDUFAF2	gain	NDUFAF2:ENST00000296597:e.1::intergenic	chr5:61013693::chr5:72765532	truncated_transcripts	2	1	FALSE	FALSE	FALSE	NA	TRUE	TRUE	FALSE	NA	X	Metformin	FALSE
EOC332	PPP5C	gain	PPP5C:amp	NA	amplification	2	7-8	FALSE	FALSE	FALSE	NA	TRUE	FALSE	NA	NA	X	LB-100	FALSE
EOC332	PSMC4	gain	PSMC4:amp	NA	amplification	5	8	FALSE	FALSE	FALSE	NA	TRUE	TRUE	TRUE	NA	X	Bortezomib, Ixazomib, Ixazomib Citrate, Oprozomib	TRUE
EOC332	TP53	loss	TP53:NM_000546.6:exon7:c.686_687del:p.C229Yfs*10	chr17:7674275TAC>T	frameshift_deletion	NA	NA	FALSE	FALSE	FALSE	NA	TRUE	TRUE	NA	TRUE	IVA	Adavosertib	TRUE
EOC333	ADORA2A	gain	ADORA2A:amp	NA	amplification	0	9-15	FALSE	FALSE	FALSE	NA	TRUE	FALSE	NA	NA	X	Imaradenant, PBF-999	FALSE
EOC333	ALK	gain	ALK:ENST00000389048:e.1::CIRBP:ENST00000587896:antisense	chr2:29800740::chr19:1263291	truncated_transcripts	7	0	FALSE	FALSE	FALSE	NA	FALSE	TRUE	FALSE	NA	X	Alectinib, ASP-3026, Brigatinib, Ceritinib, Crizotinib, Entrectinib, Lorlatinib	FALSE
EOC333	APEX1	gain	APEX1:amp	NA	amplification	2-3	5-18	TRUE	TRUE	FALSE	NA	FALSE	TRUE	TRUE	NA	X	APX-3330	TRUE
EOC333	GRIN2B	gain	GRIN2B:amp	NA	amplification	2-6	4-11	FALSE	FALSE	FALSE	NA	FALSE	FALSE	NA	NA	X	Memantine	FALSE
EOC333	KLRC1	gain	KLRC1:amp	NA	amplification	2-6	4-11	FALSE	FALSE	FALSE	NA	FALSE	FALSE	NA	NA	X	Monalizumab	FALSE
EOC333	KRAS	gain	KRAS:amp	NA	amplification	2-6	4-11	FALSE	TRUE	FALSE	NA	FALSE	TRUE	TRUE	NA	IVB	Adagrasib, Sotorasib	TRUE
EOC333	LAG3	gain	LAG3:amp	NA	amplification	2-6	4-12	FALSE	FALSE	FALSE	NA	FALSE	FALSE	NA	NA	X	Fianlimab, Relatlimab	FALSE
EOC333	NDUFA9	gain	NDUFA9:amp	NA	amplification	2-6	4-12	TRUE	TRUE	FALSE	NA	FALSE	TRUE	TRUE	NA	X	Metformin	TRUE
EOC333	NRG1	gain	WRN:ENST00000298139:e.1::NRG1:ENST00000405005:e.2;NRG1:ENST00000520407:e.1::WRN:ENST00000298139:antisense;NRG1:ENST00000520407:e.1::TTI2:ENST00000360742:e.2;NRG1:ENST00000520407:e.1::FUT10:ENST00000327671:e.4	chr8:31035949::chr8:32230601;chr8:31133105::chr8:32512428;chr8:31893904::chr8:33515278;chr8:32288083::chr8:33420440	multiple	5	0	FALSE	FALSE	FALSE	NA	FALSE	TRUE	FALSE	NA	II	Zenocutuzumab	FALSE
EOC333	PARP2	gain	PARP2:amp	NA	amplification	2-3	5-18	TRUE	TRUE	FALSE	NA	FALSE	TRUE	TRUE	NA	IVB	Niraparib, Olaparib, Rucaparib, Talazoparib	TRUE
EOC333	PDGFB	gain	PDGFB:ENST00000331163:e.1::GAREM1:ENST00000269209:antisense	chr18:32283460::chr22:39238392	truncated_transcripts	1-3	0-1	FALSE	FALSE	FALSE	NA	TRUE	TRUE	FALSE	NA	X	Imatinib	FALSE
EOC333	PNP	gain	PNP:amp	NA	amplification	2-3	5-18	FALSE	FALSE	FALSE	NA	FALSE	FALSE	NA	NA	X	Forodesine, Forodesine Hydrochloride	FALSE
EOC333	TP53	loss	TP53:NM_000546.6:exon6:c.659A>G:p.Y220C	chr17:7674872T>C	nonsynonymous_SNV	NA	NA	TRUE	TRUE	TRUE	NA	TRUE	TRUE	NA	TRUE	IVA	Rezatapopt	TRUE
EOC336	BARD1	loss	BARD1:NM_000465.4:exon5:c.1360C>G:p.P454A	chr2:214769267G>C	nonsynonymous_SNV	NA	NA	FALSE	FALSE	FALSE	NA	TRUE	TRUE	NA	FALSE	IIIA	Olaparib	FALSE
EOC336	BRCA1	loss	BRCA1:NM_007294.4:exon10:c.3606_3652del:p.Y1202*	chr17:43091878CTAGATAAGTTCTCTTCTGAGGACTCTAATTTCTTGGCCCCTCTTCGG>C	stopgain	NA	NA	FALSE	FALSE	TRUE	NA	TRUE	TRUE	NA	TRUE	IA	Niraparib, Olaparib, Olaparib + Bevacizumab, Rucaparib	TRUE
EOC336	BRCA1	loss	BRCA1:ENST00000357654:e.10del	chr17:43091879_43091927del	inframe_deletion	1	2	FALSE	FALSE	FALSE	NA	TRUE	TRUE	NA	FALSE	IA	Niraparib, Olaparib, Olaparib + Bevacizumab, Rucaparib	FALSE
EOC336	CD70	gain	CD70:NM_001252.5:exon3:c.261T>A:p.H87Q	chr19:6586341A>T	nonsynonymous_SNV	NA	NA	FALSE	FALSE	FALSE	NA	TRUE	FALSE	FALSE	NA	X	Cusatuzumab	FALSE
EOC336	ERBB2	gain	ERBB2:ENST00000269571:e.3::intergenic	chr17:39709229::chr22:35480414	truncated_transcripts	3	0	FALSE	FALSE	FALSE	NA	TRUE	TRUE	FALSE	NA	X	AC-480, AEE-788, Afatinib, BMS-690514, CUDC-101, Dacomitinib, Dacomitinib Anhydrous, JNJ-26483327, Lapatinib, MP-412, Neratinib, Pertuzumab, Poziotinib, Sapitinib, TAK-285, Tesevatinib, Trastuzumab, Tucatinib, Vandetanib, Varlitinib, Zanidatamab, Zenocutuzumab	FALSE
EOC336	F10	gain	F10:NM_000504.4:exon8:c.1027C>G:p.L343V	chr13:113149077C>G	nonsynonymous_SNV	NA	NA	FALSE	FALSE	FALSE	NA	TRUE	TRUE	FALSE	NA	X	Apixaban, Rivaroxaban	FALSE
EOC336	FGFR2	gain	FGFR2:NM_000141.5:exon7:c.755C>G:p.S252W,FGFR2:NM_022970.4:exon7:c.755C>G:p.S252W	chr10:121520163G>C	nonsynonymous_SNV	NA	NA	FALSE	FALSE	TRUE	NA	TRUE	TRUE	TRUE	NA	IIIB	Futibatinib, Pemigatinib	TRUE
EOC336	GSK3B	gain	GSK3B:ENST00000264235:e.1_9del	chr3:119846815_120123113del	5prime_deletion	2	1	FALSE	FALSE	FALSE	NA	TRUE	TRUE	FALSE	NA	X	LY-2090314	FALSE
EOC336	MET	gain	MET:NM_000245.4:exon2:c.1129A>G:p.I377V	chr7:116700213A>G	nonsynonymous_SNV	NA	NA	FALSE	FALSE	FALSE	NA	TRUE	FALSE	TRUE	NA	X	Altiratinib, AMG-208, AMG-337, Amivantamab, Cabozantinib, Cabozantinib S-Malate, Capmatinib, Crizotinib, Elzovantinib, Emibetuzumab, Foretinib, Glesatinib, Golvatinib, Merestinib, MK-2461, MK-8033, Onartuzumab, Savolitinib, Tepotinib, Tivantinib	FALSE
EOC336	NDUFB9	gain	NDUFB9:amp	NA	amplification	2	9	FALSE	FALSE	FALSE	NA	TRUE	TRUE	FALSE	NA	X	Metformin	FALSE
EOC336	NDUFV3	gain	intergenic::NDUFV3:ENST00000354250:e.2	chr10:2858438::chr21:42881739	fusion_from_unknown	2	1	FALSE	FALSE	FALSE	NA	TRUE	TRUE	FALSE	NA	X	Metformin	FALSE
EOC336	NTRK2	gain	NTRK2:ENST00000277120:e.12::BIRC6:ENST00000421745:e.67;BIRC6:ENST00000421745:e.66::NTRK2:ENST00000277120:e.13	chr2:32577294::chr9:84832611;chr2:32581383::chr9:84832460	balanced_translocation	0	2	FALSE	FALSE	FALSE	NA	TRUE	TRUE	FALSE	NA	IC	Entrectinib, Larotrectinib, Repotrectinib	FALSE
EOC336	PSMD1	gain	intergenic::PSMD1:ENST00000308696:e.17	chr2:231135794::chr2:231717854	fusion_from_unknown	3	2	FALSE	FALSE	FALSE	NA	TRUE	TRUE	FALSE	NA	X	Bortezomib, Ixazomib, Ixazomib Citrate, Oprozomib	FALSE
EOC336	PTEN	loss	PTEN:ENST00000371953:e.6::intergenic	chr10:87952176::chr10:87975384	truncated_transcripts	0	2	FALSE	FALSE	TRUE	NA	TRUE	TRUE	NA	TRUE	IIIA	Capivasertib + Fulvestrant	TRUE
EOC336	PTK2	gain	PTK2:amp	NA	amplification	2	8	FALSE	FALSE	TRUE	NA	TRUE	TRUE	TRUE	NA	X	Defactinib, GSK-2256098	TRUE
EOC336	RARA	gain	ZNF143:ENST00000396602:antisense::RARA:ENST00000254066:e.3	chr11:9459769::chr17:40345697	fusion_from_unknown	2	1	FALSE	FALSE	TRUE	NA	TRUE	TRUE	TRUE	NA	IIIB	Arsenic Trioxide, Tretinoin, Tretinoin + Arsenic Trioxide	TRUE
EOC336	TP53	loss	TP53:NM_000546.6:exon6:c.578A>G:p.H193R	chr17:7674953T>C	nonsynonymous_SNV	NA	NA	FALSE	FALSE	TRUE	NA	TRUE	TRUE	NA	TRUE	IVA	Adavosertib	TRUE
EOC336	TSC2	loss	TSC2:ENST00000219476:e.26_32dup	chr16:2077090_2083104dup	frameshift_duplication	3	0	FALSE	FALSE	FALSE	NA	TRUE	TRUE	NA	FALSE	IIIA	Everolimus	FALSE
EOC337	ACHE	gain	ACHE:NM_000665.5:exon2:c.266G>T:p.G89V	chr7:100893967C>A	nonsynonymous_SNV	NA	NA	FALSE	FALSE	FALSE	NA	TRUE	TRUE	FALSE	NA	X	Donepezil	FALSE
EOC337	AKT3	gain	SDCCAG8:ENST00000366541:antisense::AKT3:ENST00000673466:e.9	chr1:243479094::chr1:243594636	fusion_from_unknown	5	1	FALSE	FALSE	FALSE	NA	FALSE	TRUE	FALSE	NA	IVB	Capivasertib	FALSE
EOC337	ARID1A	loss	ARID1A:NM_006015.6:exon8:c.2528G>A:p.G843E	chr1:26763081G>A	nonsynonymous_SNV	NA	NA	FALSE	FALSE	FALSE	NA	TRUE	TRUE	NA	TRUE	IVA	PLX2853, Tazemetostat	TRUE
EOC337	ATR	loss	ATR:NM_001184.4:exon28:c.4943C>G:p.S1648C	chr3:142508019G>C	nonsynonymous_SNV	NA	NA	FALSE	FALSE	FALSE	NA	TRUE	FALSE	NA	FALSE	X	Ceralasertib, Talazoparib	FALSE
EOC337	EPHA6	gain	intergenic::EPHA6:ENST00000389672:e.6	chr3:97370065::chr3:102568291	fusion_from_unknown	2	1	FALSE	FALSE	FALSE	NA	TRUE	TRUE	FALSE	NA	IVB	Vandetanib	FALSE
EOC337	FGFR1	gain	FGFR1:ENST00000447712:e.2::TOP1MT:ENST00000329245:e.2	chr8:38452715::chr8:143345905	fusion	6	1-2	FALSE	FALSE	FALSE	NA	TRUE	TRUE	FALSE	NA	IIIA	Pemigatinib	FALSE
EOC337	HCK	gain	HCK:ENST00000375852:e.2_7del	chr20:32057123_32083949del	frameshift_deletion	3	1	FALSE	FALSE	FALSE	NA	TRUE	TRUE	FALSE	NA	X	Bosutinib, Dasatinib, ENMD-981693, Ilorasertib	FALSE
EOC337	NBN	loss	NBN:ENST00000265433:e.16del	chr8:89934807_89936069del	inframe_deletion	7-10	0-3	FALSE	FALSE	FALSE	NA	TRUE	TRUE	NA	FALSE	IIIA	Talazoparib + Enzalutamide	FALSE
EOC337	NDUFB9	gain	NDUFB9:amp	NA	amplification	1	16	FALSE	FALSE	FALSE	NA	TRUE	TRUE	FALSE	NA	X	Metformin	FALSE
EOC337	NDUFS6	gain	NDUFS6:amp	NA	amplification	4	6-7	FALSE	FALSE	FALSE	NA	TRUE	TRUE	FALSE	NA	X	Metformin	FALSE
EOC337	NRP1	gain	NRP1:NM_003873.7:exon4:c.443C>T:p.S148F	chr10:33263861G>A	nonsynonymous_SNV	NA	NA	FALSE	FALSE	TRUE	NA	TRUE	TRUE	TRUE	NA	X	Vesencumab	TRUE
EOC337	PIK3CA	gain	PIK3CA:NM_006218.4:exon4:c.807G>C:p.Q269H	chr3:179201534G>C	nonsynonymous_SNV	NA	NA	FALSE	FALSE	TRUE	NA	TRUE	TRUE	TRUE	NA	IIIA	Inavolisib + Palbociclib + Fulvestrant, Alpelisib + Fulvestrant, Capivasertib + Fulvestrant	TRUE
EOC337	PIK3CD	gain	EPHA6:ENST00000389672:e.5::PIK3CD:ENST00000377346:antisense	chr1:9636755::chr3:97370047	truncated_transcripts	3	1-3	FALSE	FALSE	FALSE	NA	TRUE	TRUE	FALSE	NA	X	AMG-319, Apitolisib, AZD-8186, BGT-226, Dactolisib, Duvelisib, Gedatolisib, Idelalisib, INCB-40093, Omipalisib, Parsaclisib, PF-04691502, Pictilisib, Pilaralisib, SF-1126, Sonolisib, Voxtalisib, Zandelisib	FALSE
EOC337	PSMD6	gain	PSMD6:NM_014814.3:exon5:c.742G>C:p.E248Q	chr3:64018683C>G	nonsynonymous_SNV	NA	NA	FALSE	FALSE	TRUE	NA	TRUE	TRUE	TRUE	NA	X	Bortezomib, Ixazomib, Ixazomib Citrate, Oprozomib	TRUE
EOC337	PTK2	gain	PTK2:amp	NA	amplification	1	16-17	FALSE	FALSE	TRUE	NA	TRUE	TRUE	TRUE	NA	X	Defactinib, GSK-2256098	TRUE
EOC337	SRD5A1	gain	SRD5A1:amp	NA	amplification	4	6-7	FALSE	FALSE	TRUE	NA	TRUE	TRUE	TRUE	NA	X	Abiraterone	TRUE
EOC337	SRD5A3	gain	SRD5A3:NM_024592.5:exon5:c.956A>C:p.X319S	chr4:55370090A>C	stoploss	NA	NA	FALSE	FALSE	FALSE	NA	TRUE	FALSE	TRUE	NA	X	Abiraterone	FALSE
EOC337	TP53	loss	TP53:NM_000546.6:exon5:c.524G>A:p.R175H	chr17:7675088C>T	nonsynonymous_SNV	NA	NA	FALSE	FALSE	TRUE	NA	TRUE	TRUE	NA	TRUE	IVA	Adavosertib	TRUE
EOC337	TSC2	loss	TSC2:NM_000548.5:exon14:c.1396C>G:p.L466V	chr16:2063006C>G	nonsynonymous_SNV	NA	NA	FALSE	FALSE	FALSE	NA	TRUE	TRUE	NA	FALSE	IIIA	Everolimus	FALSE
EOC337	XPO1	gain	USP34:ENST00000398571:e.0::XPO1:ENST00000401558:e.25	chr2:61475685::chr2:61481009	promoter_hijacking	4	2-3	FALSE	FALSE	FALSE	NA	TRUE	TRUE	FALSE	NA	X	Selinexor	FALSE
EOC339	AKT2	gain	AKT2:amp	NA	amplification	1-2	3-9	FALSE	TRUE	FALSE	NA	FALSE	TRUE	TRUE	NA	IVB	Capivasertib	TRUE
EOC339	AKT3	gain	AKT3:ENST00000673466:e.1_2dup	chr1:243806075_243901084dup	truncated_duplication	2	2	FALSE	FALSE	FALSE	NA	FALSE	FALSE	FALSE	NA	X	Afuresertib, Capivasertib, Ipatasertib, MK-2206, Triciribine Phosphate, Uprosertib	FALSE
EOC339	AR	gain	PLEKHA7:ENST00000531066:antisense::AR:ENST00000374690:e.3	chr11:17021211::chrX:67685180	fusion_from_unknown	3	0	FALSE	FALSE	FALSE	NA	FALSE	TRUE	FALSE	NA	X	Abiraterone, Apalutamide, Darolutamide, Enzalutamide	FALSE
EOC339	BRAF	gain	BRAF:amp	NA	amplification	3-4	4-6	FALSE	FALSE	FALSE	NA	FALSE	FALSE	NA	NA	X	Belvarafenib, Binimetinib, Cetuximab, Cobimetinib, Dabrafenib, Encorafenib, Panitumumab, Plixorafenib, Regorafenib, Selumetinib, Sorafenib, Sorafenib Tosylate, Tovorafenib, Trametinib, Vemurafenib	FALSE
EOC339	CCNE1	gain	CCNE1:amp	NA	amplification	1-2	6-9	TRUE	FALSE	FALSE	NA	FALSE	TRUE	TRUE	NA	IVA	Lunresertib + Camonsertib	TRUE
EOC339	CD274	gain	CD274:amp	NA	amplification	0-1	4-10	FALSE	TRUE	FALSE	NA	FALSE	TRUE	TRUE	NA	X	Atezolizumab, Avelumab, Danburstotug, Durvalumab, Envafolimab, Sugemalimab	TRUE
EOC339	DDR2	gain	DDR2:amp	NA	amplification	2	3-7	FALSE	FALSE	FALSE	NA	FALSE	FALSE	NA	NA	X	Regorafenib	FALSE
EOC339	EPHA1	gain	EPHA1:amp	NA	amplification	3-4	4-6	FALSE	FALSE	FALSE	NA	FALSE	FALSE	NA	NA	X	Vandetanib	FALSE
EOC339	EPHB6	gain	EPHB6:amp	NA	amplification	3-4	4-6	FALSE	FALSE	FALSE	NA	FALSE	FALSE	NA	NA	X	Vandetanib	FALSE
EOC339	ERBB4	gain	ERBB4:ENST00000342788:e.1::ZHX2:ENST00000314393:antisense	chr2:212354059::chr8:122951737	truncated_transcripts	3	1	FALSE	FALSE	FALSE	NA	FALSE	TRUE	FALSE	NA	X	AC-480, Afatinib, BMS-690514, Dacomitinib, Dacomitinib Anhydrous, JNJ-26483327, Neratinib, Poziotinib, Vandetanib	FALSE
EOC339	EZH2	gain	EZH2:amp	NA	amplification	3-4	4-6	FALSE	TRUE	FALSE	NA	FALSE	TRUE	TRUE	NA	IVB	Tazemetostat	TRUE
EOC339	FYN	gain	FYN:ENST00000354650:e.4_13dup	chr6:111670751_111720586dup	inframe_duplication	1	1	FALSE	FALSE	FALSE	NA	FALSE	TRUE	FALSE	NA	IVB	Dasatinib	FALSE
EOC339	GPD2	gain	GPD2:ENST00000438166:e.2::CACNA1A:ENST00000360228:antisense	chr2:156488827::chr19:13451970	truncated_transcripts	5	1	FALSE	FALSE	FALSE	NA	FALSE	FALSE	FALSE	NA	X	Metformin	FALSE
EOC339	GRIN2D	gain	intergenic::GRIN2D:ENST00000263269:e.12	chr19:48427975::chr19:56876381	fusion_from_unknown	2	1	FALSE	FALSE	FALSE	NA	FALSE	TRUE	FALSE	NA	X	Memantine	FALSE
EOC339	HDAC8	gain	HDAC8:ENST00000373573:e.10::NHSL2:ENST00000633930:e.4;PIN4:ENST00000373669:antisense::HDAC8:ENST00000373573:e.11;RASGRF2:ENST00000265080:antisense::HDAC8:ENST00000373573:e.11	chrX:72134643::chrX:72347902;chrX:72196599::chrX:72348379;chr5:80968058::chrX:72347890	multiple	3	NA	FALSE	FALSE	FALSE	NA	FALSE	TRUE	FALSE	NA	X	Belinostat, CUDC-101, Entinostat, Mocetinostat, Panobinostat	FALSE
EOC339	IGF1R	gain	intergenic::IGF1R:ENST00000650285:e.19	chr15:98942079::chr15:99037359	fusion_from_unknown	2	1	FALSE	FALSE	FALSE	NA	FALSE	TRUE	FALSE	NA	X	Cixutumumab, Figitumumab, Ganitumab	FALSE
EOC339	JAK2	gain	JAK2:amp	NA	amplification	0-1	4-10	FALSE	FALSE	FALSE	NA	FALSE	FALSE	NA	NA	X	AZD-1480, BMS-911543, Fedratinib, Ruxolitinib	FALSE
EOC339	KDM6A	loss	SCML2:ENST00000251900:antisense::KDM6A:ENST00000611820:e.5	chrX:18262749::chrX:44996790	fusion_from_unknown	2	1	FALSE	FALSE	FALSE	NA	FALSE	TRUE	NA	FALSE	IVA	Tazemetostat	FALSE
EOC339	NDUFA12	gain	VEZT:ENST00000436874:antisense::NDUFA12:ENST00000327772:e.3	chr12:94994647::chr12:95285164	fusion_from_unknown	1	1	FALSE	FALSE	FALSE	NA	FALSE	TRUE	FALSE	NA	X	Metformin	FALSE
EOC339	NDUFB2	gain	NDUFB2:amp	NA	amplification	3-4	4-6	FALSE	FALSE	FALSE	NA	FALSE	FALSE	NA	NA	X	Metformin	FALSE
EOC339	NDUFB7	gain	NDUFB7:amp	NA	amplification	1-2	2-7	TRUE	FALSE	FALSE	NA	FALSE	TRUE	TRUE	NA	X	Metformin	TRUE
EOC339	NOTCH1	gain	NOTCH1:NM_017617.5:exon10:c.1616A>T:p.N539I	chr9:136516034T>A	nonsynonymous_SNV	NA	NA	TRUE	FALSE	FALSE	NA	FALSE	TRUE	TRUE	NA	X	Brontictuzumab	TRUE
EOC339	NRP1	gain	BEX4:ENST00000372695:e.3::NRP1:ENST00000374867:e.2	chr10:33333206::chrX:103216485	fusion	4	1	FALSE	FALSE	FALSE	NA	FALSE	TRUE	FALSE	NA	X	Vesencumab	FALSE
EOC339	PIM1	gain	PIM1:amp	NA	amplification	2	3-7	FALSE	FALSE	FALSE	NA	FALSE	FALSE	NA	NA	X	AZD-1208	FALSE
EOC339	PSMC4	gain	PSMC4:amp	NA	amplification	1-2	3-9	FALSE	TRUE	FALSE	NA	FALSE	TRUE	TRUE	NA	X	Bortezomib, Ixazomib, Ixazomib Citrate, Oprozomib	TRUE
EOC339	PSMD2	gain	PSMD2:NM_002808.5:exon1:c.109delG:p.D38Tfs*26	chr3:184299374CG>C	frameshift_deletion	NA	NA	FALSE	FALSE	FALSE	NA	TRUE	FALSE	FALSE	NA	X	Bortezomib, Ixazomib, Ixazomib Citrate, Oprozomib	FALSE
EOC339	RAD51B	loss	RAD51B:ENST00000471583:e.7::P3H2:ENST00000319332:antisense;P3H2:ENST00000319332:antisense::RAD51B:ENST00000471583:e.8	chr3:190009550::chr14:68291508;chr3:190019213::chr14:68281309	multiple	1-2	1	FALSE	FALSE	FALSE	NA	FALSE	TRUE	NA	FALSE	IIIA	Olaparib	FALSE
EOC339	SMO	gain	SMO:NM_005631.5:exon1:c.74delA:p.D25Afs*30	chr7:129189224GA>G	frameshift_deletion	NA	NA	FALSE	FALSE	FALSE	NA	TRUE	FALSE	FALSE	NA	X	BMS-833923, Glasdegib, Sonidegib, Taladegib, Vismodegib	FALSE
EOC339	SMO	gain	SMO:NM_005631.5:exon1:c.67_68del:p.L23Gfs*112	chr7:129189217GCT>G	frameshift_deletion	NA	NA	FALSE	FALSE	FALSE	NA	TRUE	FALSE	FALSE	NA	X	BMS-833923, Glasdegib, Sonidegib, Taladegib, Vismodegib	FALSE
EOC339	TP53	loss	TP53:NM_000546.6:exon5:c.378C>G:p.Y126X	chr17:7675234G>C	stopgain	NA	NA	TRUE	TRUE	FALSE	NA	TRUE	TRUE	NA	TRUE	IVA	Adavosertib	TRUE
EOC339	VEGFA	gain	VEGFA:amp	NA	amplification	2	4-7	FALSE	FALSE	FALSE	NA	FALSE	FALSE	NA	NA	X	Bevacizumab	FALSE
EOC340	CDK6	gain	CDK6:ENST00000424848:e.5::intergenic	chr7:92667698::chr21:19864477	truncated_transcripts	3	1	FALSE	FALSE	FALSE	NA	TRUE	TRUE	FALSE	NA	X	Abemaciclib, Palbociclib, Ribociclib	FALSE
EOC340	KMT2A	gain	KMT2A:NM_001197104.2:exon13:c.4594C>T:p.R1532C	chr11:118490147C>T	nonsynonymous_SNV	NA	NA	FALSE	TRUE	FALSE	NA	TRUE	TRUE	TRUE	NA	IIIB	Revumenib	TRUE
EOC340	NF1	loss	NF1:NM_001042492.3:exon43:c.6428-1G>C	chr17:31337367G>C	splicing	NA	NA	FALSE	TRUE	FALSE	NA	TRUE	TRUE	NA	TRUE	IIIA	Selumetinib	TRUE
EOC340	RAD54L	loss	RAD54L:ENST00000371975:e.1del	chr1:46247737_46247886del	5prime_deletion	1	1	FALSE	FALSE	FALSE	NA	TRUE	TRUE	NA	FALSE	IIIA	Olaparib	FALSE
EOC340	TP53	loss	TP53:NM_000546.6:exon7:c.722C>T:p.S241F	chr17:7674241G>A	nonsynonymous_SNV	NA	NA	FALSE	TRUE	FALSE	NA	TRUE	TRUE	NA	TRUE	IVA	Adavosertib	TRUE
EOC340	TSC2	loss	TSC2:ENST00000219476:e.22del	chr16:2073413_2074659del	frameshift_deletion	0	1	FALSE	TRUE	FALSE	NA	TRUE	TRUE	NA	TRUE	IIIA	Everolimus	TRUE
EOC341	AURKC	gain	AURKC:NM_001015878.2:exon6:c.671G>C:p.C224S	chr19:57234970G>C	nonsynonymous_SNV	NA	NA	FALSE	FALSE	FALSE	NA	TRUE	FALSE	FALSE	NA	X	AMG-900, Ilorasertib, Tozasertib	FALSE
EOC341	FBXW7	loss	FBXW7:ENST00000281708:e.5_12dup	chr4:152325501_152402972dup	inframe_duplication	0	1	TRUE	FALSE	FALSE	NA	TRUE	TRUE	NA	TRUE	IVA	Lunresertib + Camonsertib	TRUE
EOC341	NDUFA13	gain	NDUFA13:NM_015965.7:exon3:c.209C>T:p.A70V	chr19:19527316C>T	nonsynonymous_SNV	NA	NA	TRUE	FALSE	FALSE	NA	TRUE	TRUE	TRUE	NA	X	Metformin	TRUE
EOC341	NF1	loss	NF1:ENST00000358273:e.2_7dup	chr17:31107165_31182296dup	frameshift_duplication	0	1	TRUE	FALSE	FALSE	NA	TRUE	TRUE	NA	TRUE	IIIA	Selumetinib	TRUE
EOC341	NRP1	gain	NRP1:NM_003873.7:exon9:c.1603C>T:p.R535C	chr10:33213397G>A	nonsynonymous_SNV	NA	NA	FALSE	FALSE	FALSE	NA	TRUE	TRUE	FALSE	NA	X	Vesencumab	FALSE
EOC341	TP53	loss	TP53:NM_000546.6:exon5:c.527G>A:p.C176Y	chr17:7675085C>T	nonsynonymous_SNV	NA	NA	TRUE	FALSE	FALSE	NA	TRUE	TRUE	NA	TRUE	IVA	Adavosertib	TRUE
EOC351	CCDC6	gain	USP37:ENST00000258399:antisense::CCDC6:ENST00000263102:e.8	chr2:218510238::chr10:59795021	fusion_from_unknown	2	0	FALSE	FALSE	FALSE	NA	FALSE	TRUE	FALSE	NA	IVB	Pralsetinib, Selpercatinib	FALSE
EOC351	CDK12	loss	GSDMA:ENST00000301659:e.9::CDK12:ENST00000447079:e.11	chr17:39518275::chr17:39974356	fusion	1	1	FALSE	FALSE	FALSE	NA	TRUE	TRUE	NA	FALSE	IIIA	Olaparib, Talazoparib + Enzalutamide	FALSE
EOC351	ENG	gain	ENG:amp	NA	amplification	0	12-15	FALSE	FALSE	FALSE	NA	TRUE	FALSE	NA	NA	X	Carotuximab	FALSE
EOC351	ENG	gain	SH2D3C:ENST00000314830:e.9::ENG:ENST00000373203:e.2	chr9:127741859::chr9:127858746	fusion	11-13	0-1	FALSE	FALSE	FALSE	NA	TRUE	TRUE	FALSE	NA	X	Carotuximab	FALSE
EOC351	EPHA3	gain	EPHA3:ENST00000336596:e.3::KCNMA1:ENST00000286628:antisense	chr3:89219430::chr10:77491103	truncated_transcripts	2	1	FALSE	FALSE	FALSE	NA	FALSE	TRUE	FALSE	NA	X	Vandetanib	FALSE
EOC351	EPHA5	gain	EPHA5:NM_001281766.3:exon3:c.891G>T:p.E297D	chr4:65601660C>A	nonsynonymous_SNV	NA	NA	FALSE	FALSE	FALSE	NA	TRUE	FALSE	FALSE	NA	X	Vandetanib	FALSE
EOC351	EPHA6	gain	EPHA6:NM_001080448.3:exon8:c.1945G>A:p.A649T	chr3:97475402G>A	nonsynonymous_SNV	NA	NA	FALSE	FALSE	FALSE	NA	TRUE	FALSE	FALSE	NA	X	Vandetanib	FALSE
EOC351	ERBB4	gain	ERBB4:ENST00000342788:e.4dup	chr2:211786557_211922990dup	inframe_duplication	1	1	FALSE	FALSE	FALSE	NA	TRUE	TRUE	FALSE	NA	IVB	Afatinib, Dacomitinib, Neratinib, Poziotinib, Vandetanib	FALSE
EOC351	HDAC5	gain	HDAC5:ENST00000682912:e.3::GPATCH8:ENST00000591680:e.7	chr17:44095732::chr17:44423572	fusion	1	0-1	FALSE	FALSE	FALSE	NA	TRUE	TRUE	FALSE	NA	X	Belinostat, CUDC-101, Entinostat, Panobinostat	FALSE
EOC351	ITGAV	gain	ITGAV:NM_002210.5:exon13:c.1163T>C:p.I388T	chr2:186646689T>C	nonsynonymous_SNV	NA	NA	FALSE	FALSE	FALSE	NA	TRUE	FALSE	TRUE	NA	X	Etaracizumab	FALSE
EOC351	NDUFA8	gain	TTLL11:ENST00000321582:e.2::NDUFA8:ENST00000373768:e.2	chr9:122034999::chr9:122168807	fusion	1	1	FALSE	FALSE	FALSE	NA	TRUE	TRUE	FALSE	NA	X	Metformin	FALSE
EOC351	PCSK9	gain	PCSK9:amp	NA	amplification	0-1	10-11	FALSE	FALSE	FALSE	NA	TRUE	FALSE	NA	NA	X	Ongericimab	FALSE
EOC351	PIK3R1	gain	intergenic::PIK3R1:ENST00000521381:e.8	chr5:68286754::chr5:68833464	fusion_from_unknown	1	1	FALSE	FALSE	FALSE	NA	TRUE	TRUE	FALSE	NA	X	Apitolisib, BGT-226, Dactolisib, Gedatolisib, Omipalisib, PF-04691502, Pictilisib, Pilaralisib, SF-1126, Sonolisib, Voxtalisib	FALSE
EOC351	PSMC2	gain	PSMC2:NM_002803.4:exon10:c.928G>A:p.D310N	chr7:103367496G>A	nonsynonymous_SNV	NA	NA	FALSE	TRUE	TRUE	NA	TRUE	TRUE	TRUE	NA	X	Bortezomib, Ixazomib, Ixazomib Citrate, Oprozomib	TRUE
EOC351	PSMD12	gain	PSMD12:ENST00000356126:e.5::intergenic;CUL2:ENST00000374749:antisense::PSMD12:ENST00000356126:e.5;ABCA8:ENST00000586539:antisense::PSMD12:ENST00000356126:e.5;PSMD12:ENST00000356126:e.5::PSMD12:ENST00000356126:antisense;PSMD12:ENST00000356126:e.4::PSMD12:ENST00000356126:antisense	chr10:35005057::chr17:67348299;chr10:35017037::chr17:67349259;chr17:67348623::chr17:68948204;chr17:67348612::chr17:67349263	multiple	1	NA	FALSE	TRUE	TRUE	NA	TRUE	TRUE	TRUE	NA	X	Bortezomib, Ixazomib, Ixazomib Citrate, Oprozomib	TRUE
EOC351	SF3B1	gain	SF3B1:NM_012433.4:exon23:c.3520_3521delinsTT:p.E1174L	chr2:197396074TC>AA	inframe_substitution	NA	NA	FALSE	TRUE	TRUE	NA	TRUE	TRUE	TRUE	NA	IVA	Emavusertib, Ceralasertib	TRUE
EOC351	TP53	loss	TP53:NM_000546.6:exon5:c.530_532del:p.P177del	chr17:7675079TGGG>T	inframe_deletion	NA	NA	FALSE	TRUE	TRUE	NA	TRUE	TRUE	NA	TRUE	IVA	Adavosertib	TRUE
EOC357	CD47	gain	HOXD4:ENST00000306324:antisense::CD47:ENST00000361309:e.5	chr2:176148484::chr3:108059547	fusion_from_unknown	8	2	FALSE	FALSE	FALSE	NA	TRUE	TRUE	FALSE	NA	X	Magrolimab	FALSE
EOC357	CD47	gain	CD47:amp	NA	amplification	1	7-8	FALSE	FALSE	FALSE	NA	TRUE	FALSE	NA	NA	X	Magrolimab	FALSE
EOC357	EPHA1	gain	EPHA1:NM_005232.5:exon5:c.980T>A:p.V327E	chr7:143399269A>T	nonsynonymous_SNV	NA	NA	FALSE	FALSE	FALSE	NA	TRUE	FALSE	TRUE	NA	X	Vandetanib	FALSE
EOC357	EPHA6	gain	EPHA6:amp	NA	amplification	1	7-8	FALSE	FALSE	FALSE	NA	TRUE	FALSE	NA	NA	X	Vandetanib	FALSE
EOC357	EPHB3	gain	EPHB3:amp	NA	amplification	1	7-8	FALSE	FALSE	FALSE	NA	TRUE	FALSE	NA	NA	X	Vandetanib	FALSE
EOC357	GRIN2A	gain	GRIN2A:ENST00000330684:e.4::intergenic;ITPR2:ENST00000381340:antisense::GRIN2A:ENST00000330684:e.5	chr12:27144107::chr16:9859600;chr12:26673134::chr16:9859808	balanced_translocation	3	1	FALSE	FALSE	FALSE	NA	FALSE	TRUE	FALSE	NA	X	Memantine	FALSE
EOC357	HTR3C	gain	HTR3C:amp	NA	amplification	1	7-8	FALSE	FALSE	FALSE	NA	TRUE	FALSE	NA	NA	X	Ramosetron	FALSE
EOC357	HTR3D	gain	HTR3D:amp	NA	amplification	1	7-8	FALSE	FALSE	FALSE	NA	TRUE	FALSE	NA	NA	X	Ramosetron	FALSE
EOC357	HTR3E	gain	HTR3E:amp	NA	amplification	1	7-8	FALSE	FALSE	FALSE	NA	TRUE	FALSE	NA	NA	X	Ramosetron	FALSE
EOC357	KRAS	gain	KRAS:amp	NA	amplification	0-1	3-14	FALSE	FALSE	TRUE	NA	FALSE	TRUE	TRUE	NA	IVB	Adagrasib, Sotorasib	TRUE
EOC357	NDUFB5	gain	NDUFB5:amp	NA	amplification	1	7-8	FALSE	FALSE	FALSE	NA	TRUE	FALSE	NA	NA	X	Metformin	FALSE
EOC357	PIK3CA	gain	PIK3CA:amp	NA	amplification	1	7-8	FALSE	FALSE	FALSE	NA	TRUE	FALSE	NA	NA	X	Alpelisib, Apitolisib, BGT-226, Capivasertib, Dactolisib, Fulvestrant, Gedatolisib, Inavolisib, Omipalisib, Palbociclib, PF-04691502, Pictilisib, Pilaralisib, Serabelisib, SF-1126, Sonolisib, Voxtalisib	FALSE
EOC357	PSMD2	gain	PSMD2:amp	NA	amplification	1	7-8	TRUE	FALSE	FALSE	NA	TRUE	TRUE	TRUE	NA	X	Bortezomib, Ixazomib, Ixazomib Citrate, Oprozomib	TRUE
EOC357	TIGIT	gain	TIGIT:amp	NA	amplification	1	7-8	FALSE	FALSE	FALSE	NA	TRUE	FALSE	NA	NA	X	Domvanalimab, Ociperlimab, Tiragolumab	FALSE
EOC357	TNFRSF17	gain	TNFRSF17:amp	NA	amplification	1-2	2-12	FALSE	FALSE	FALSE	NA	FALSE	FALSE	NA	NA	X	Teclistamab	FALSE
EOC357	TP53	loss	TP53:NM_000546.6:exon5:c.524G>A:p.R175H	chr17:7675088C>T	nonsynonymous_SNV	NA	NA	TRUE	FALSE	TRUE	NA	TRUE	TRUE	NA	TRUE	IVA	Adavosertib	TRUE
EOC359	BRAF	gain	BRAF:ENST00000644969:e.11_19dup	chr7:140733692_140784869dup	inframe_duplication	3	1	TRUE	TRUE	FALSE	FALSE	FALSE	TRUE	TRUE	NA	IIIA	Cobimetinib, Trametinib	TRUE
EOC359	EPHA3	gain	EPHA3:ENST00000336596:e.3_14del	chr3:89138189_89450133del	inframe_deletion	3-4	1	FALSE	FALSE	FALSE	TRUE	FALSE	TRUE	FALSE	NA	IVB	Vandetanib	FALSE
EOC359	ESR1	gain	ESR1:ENST00000206249:e.6::CCDC30:ENST00000668663:e.7;ESR1:ENST00000638569:e.1::CCDC30:ENST00000668663:e.7	chr1:42551354::chr6:152076904	fusion	3-4	1-2	TRUE	TRUE	FALSE	TRUE	TRUE	TRUE	TRUE	NA	IIIB	Elacestrant	TRUE
EOC359	FNTB	gain	FUT8:ENST00000673929:e.1::FNTB:ENST00000246166:e.9	chr14:65043755::chr14:65429681	fusion	3	1	FALSE	TRUE	FALSE	FALSE	FALSE	TRUE	TRUE	NA	IVB	Tipifarnib	TRUE
EOC359	KIF11	gain	KIF11:ENST00000260731:e.18_19del	chr10:92644734_92648598del	frameshift_deletion	2	1	FALSE	FALSE	FALSE	TRUE	FALSE	TRUE	FALSE	NA	X	Ispinesib, Litronesib	FALSE
EOC359	PSMD13	gain	KLHL3:ENST00000309755:antisense::PSMD13:ENST00000532097:e.2	chr5:137677902::chr11:235787	fusion_from_unknown	4	0	FALSE	FALSE	FALSE	TRUE	FALSE	TRUE	FALSE	NA	X	Bortezomib, Ixazomib, Ixazomib Citrate, Oprozomib	FALSE
EOC359	TP53	loss	TP53:NM_000546.6:exon1:UTR5	chr17:7687376C>G	splicing	NA	NA	TRUE	TRUE	FALSE	TRUE	TRUE	TRUE	NA	TRUE	IVA	Adavosertib	TRUE
EOC359	TSC2	loss	TSC2:NM_000548.5:exon31:c.3685C>T:p.Q1229X	chr16:2081669C>T	stopgain	NA	NA	TRUE	TRUE	FALSE	TRUE	TRUE	TRUE	NA	TRUE	IIIA	Everolimus	TRUE
EOC361	ATP4A	gain	ATP4A:NM_000704.3:exon11:c.1655C>T:p.A552V	chr19:35557693G>A	nonsynonymous_SNV	NA	NA	FALSE	FALSE	FALSE	NA	FALSE	TRUE	FALSE	NA	X	Rabeprazole	FALSE
EOC361	CCDC6	gain	CCDC6:ENST00000263102:e.2del	chr10:59842871_59861925del	inframe_deletion	2	1	FALSE	FALSE	FALSE	NA	FALSE	TRUE	FALSE	NA	IVB	Pralsetinib, Selpercatinib	FALSE
EOC361	CSF1	gain	intergenic::CSF1:ENST00000329608:e.2	chr1:109909585::chr1:109951909	fusion_from_unknown	2	1	FALSE	FALSE	FALSE	NA	TRUE	TRUE	FALSE	NA	X	PD-360324	FALSE
EOC361	EPHA2	gain	HSPB7:ENST00000311890:e.0::EPHA2:ENST00000358432:e.4	chr1:16022286::chr1:16145293	promoter_hijacking	3	1	FALSE	FALSE	FALSE	NA	TRUE	TRUE	FALSE	NA	X	Dasatinib, Regorafenib, Vandetanib	FALSE
EOC361	EPHA8	gain	EPHA8:ENST00000166244:e.13::EIF4G3:ENST00000602326:antisense	chr1:21130604::chr1:22600163	truncated_transcripts	3	1	FALSE	FALSE	FALSE	NA	FALSE	TRUE	FALSE	NA	X	Vandetanib	FALSE
EOC361	EPHB1	gain	EPHB1:ENST00000398015:e.1::intergenic;intergenic::EPHB1:ENST00000398015:e.2;EPHB1:ENST00000398015:e.1::NCKAP1:ENST00000361354:e.13;RYK:ENST00000623711:e.0::EPHB1:ENST00000398015:e.2;EPHB1:ENST00000398015:e.1::RYK:ENST00000623711:antisense;RYK:ENST00000623711:antisense::EPHB1:ENST00000398015:e.2;EPHB1:ENST00000398015:e.1::RYK:ENST00000623711:e.2	chr2:182578696::chr3:134840231;chr2:182578691::chr3:134840092;chr2:182982597::chr3:134840584;chr3:134258757::chr3:134840231;chr3:134840125::chr6:49414791;chr3:134259327::chr3:134840125;chr3:134259237::chr3:134840190;chr3:134840032::chr6:49414472;chr3:134259434::chr3:134840187	multiple	3	NA	FALSE	FALSE	FALSE	NA	TRUE	TRUE	FALSE	NA	IVB	Vandetanib	FALSE
EOC361	EPHB2	gain	EPHB2:NM_017449.5:exon16:c.2927C>T:p.A976V	chr1:22913536C>T	nonsynonymous_SNV	NA	NA	FALSE	FALSE	FALSE	NA	FALSE	FALSE	TRUE	NA	X	Vandetanib	FALSE
EOC361	FLT1	gain	FLT1:NM_002019.4:exon16:c.2319G>A:p.W773X	chr13:28345481C>T	stopgain	NA	NA	FALSE	FALSE	FALSE	NA	FALSE	FALSE	FALSE	NA	X	AEE-788, Axitinib, BMS-690514, Brivanib, Brivanib Alaninate, Cediranib, CEP-11981, Dovitinib, Famitinib, Foretinib, Fruquintinib, Glesatinib, Ilorasertib, Lenvatinib, Lenvatinib Mesylate, Lucitanib, Pazopanib, Regorafenib, Sorafenib, Sorafenib Tosylate, Sunitinib, Sunitinib Malate, Vandetanib, Vatalanib, XL-820, XL-999	FALSE
EOC361	FN1	gain	FN1:ENST00000354785:e.45_46del;FN1:ENST00000354785:e.44_45del;FN1:ENST00000354785:e.43_44del;FN1:ENST00000354785:e.43del;FN1:ENST00000354785:e.39del;FN1:ENST00000354785:e.38_39del;FN1:ENST00000354785:e.37_38del;FN1:ENST00000354785:e.36_37del;FN1:ENST00000354785:e.35_36del;FN1:ENST00000354785:e.23del;FN1:ENST00000354785:e.22_23del;FN1:ENST00000354785:e.19_20del;FN1:ENST00000354785:e.15_16del;FN1:E…	chr2:215361626_215361969del;chr2:215362079_215364879del;chr2:215364985_215365505del;chr2:215365629_215367862del;chr2:215372376_215373323del;chr2:215373411_215375214del;chr2:215375393_215375629del;chr2:215375718_215376498del;chr2:215376674_215378175del;chr2:215394721_215397139del;chr2:215397223_215397680del;chr2:215404655_215406238del;chr2:215408426_215409563del;chr2:215409738_215409933del;chr2:21…	multiple	3	NA	FALSE	FALSE	FALSE	NA	FALSE	TRUE	FALSE	NA	X	L19SIP 131I	FALSE
EOC361	HDAC10	gain	HDAC10:NM_032019.6:exon10:c.825G>A:p.M275I	chr22:50248743C>T	nonsynonymous_SNV	NA	NA	FALSE	FALSE	TRUE	NA	TRUE	TRUE	TRUE	NA	X	Belinostat, CUDC-101, Entinostat, Panobinostat	TRUE
EOC361	IGF1R	gain	IGF1R:NM_000875.5:exon21:c.4035_4036del:p.Y1346Rfs*27	chr15:98957372CTT>C	frameshift_deletion	NA	NA	FALSE	FALSE	FALSE	NA	TRUE	FALSE	FALSE	NA	X	Cixutumumab, Figitumumab, Ganitumab	FALSE
EOC361	IGF2	gain	IGF2:ENST00000416167:e.3_4del;IGF2:ENST00000416167:e.3del;IGF2:ENST00000416167:e.1del	chr11:2133223_2133517del;chr11:2133664_2135366del;chr11:2135531_2138231del	multiple	1	NA	FALSE	FALSE	FALSE	NA	FALSE	TRUE	FALSE	NA	X	Dusigitumab	FALSE
EOC361	LAG3	gain	LAG3:ENST00000203629:e.7::PTPN6:ENST00000318974:antisense	chr12:6778119::chr12:6954984	truncated_transcripts	2	1	FALSE	FALSE	FALSE	NA	TRUE	TRUE	FALSE	NA	X	Fianlimab, Relatlimab	FALSE
EOC361	MST1R	gain	IP6K1:ENST00000321599:e.2::MST1R:ENST00000296474:e.2	chr3:49745132::chr3:49906596	fusion	3	1	FALSE	FALSE	FALSE	NA	TRUE	TRUE	FALSE	NA	X	Glesatinib, MK-8033, Narnatumab	FALSE
EOC361	NDUFA13	gain	NDUFA13:amp	NA	amplification	1	13-16	FALSE	FALSE	FALSE	NA	TRUE	FALSE	NA	NA	X	Metformin	FALSE
EOC361	NDUFB7	gain	NDUFB7:ENST00000215565:e.1_2del	chr19:14566933_14571889del	inframe_deletion	4	0	FALSE	FALSE	FALSE	NA	FALSE	TRUE	FALSE	NA	X	Metformin	FALSE
EOC361	NDUFS2	gain	NDUFS2:ENST00000676972:e.12del;NDUFS2:ENST00000676972:e.14del	chr1:161213725_161213863del;chr1:161213925_161214164del	multiple	2	0	FALSE	FALSE	FALSE	NA	FALSE	TRUE	FALSE	NA	X	Metformin	FALSE
EOC361	NDUFS3	gain	MTCH2:ENST00000302503:antisense::NDUFS3:ENST00000263774:e.2	chr11:47577861::chr11:47642345	fusion_from_unknown	2	1	FALSE	FALSE	FALSE	NA	TRUE	TRUE	FALSE	NA	X	Metformin	FALSE
EOC361	NDUFS7	gain	NDUFS7:ENST00000233627:e.4_5del	chr19:1388938_1390877del	frameshift_deletion	2	0	FALSE	FALSE	FALSE	NA	FALSE	TRUE	FALSE	NA	X	Metformin	FALSE
EOC361	NF1	loss	NF1:NM_001042492.3:exon21:c.2446C>T:p.R816X	chr17:31229061C>T	stopgain	NA	NA	FALSE	FALSE	TRUE	NA	TRUE	TRUE	NA	TRUE	IIIA	Selumetinib	TRUE
EOC361	NRG1	gain	intergenic::NRG1:ENST00000405005:e.2	chr7:17427438::chr8:32334175	fusion_from_unknown	2	1-3	FALSE	FALSE	FALSE	NA	TRUE	TRUE	FALSE	NA	II	Zenocutuzumab	FALSE
EOC361	PDE4C	gain	PDE4C:ENST00000262805:e.7::PGPEP1:ENST00000269919:antisense	chr19:18219969::chr19:18366167	truncated_transcripts	7-8	1	FALSE	FALSE	FALSE	NA	TRUE	TRUE	FALSE	NA	X	Roflumilast	FALSE
EOC361	PDE4C	gain	PDE4C:amp	NA	amplification	1-2	8	FALSE	FALSE	FALSE	NA	TRUE	FALSE	NA	NA	X	Roflumilast	FALSE
EOC361	PIK3R2	gain	PIK3R2:amp	NA	amplification	1	7-8	FALSE	FALSE	TRUE	NA	TRUE	TRUE	TRUE	NA	X	Apitolisib, BGT-226, Dactolisib, Gedatolisib, Omipalisib, PF-04691502, Pictilisib, Pilaralisib, SF-1126, Sonolisib, Voxtalisib	TRUE
EOC361	PSMA7	gain	PSMA7:ENST00000370873:e.2del	chr20:62139907_62140820del;chr20:62140943_62143207del	multiple	4	0	FALSE	FALSE	FALSE	NA	FALSE	TRUE	FALSE	NA	X	Bortezomib, Ixazomib, Ixazomib Citrate, Marizomib, Oprozomib	FALSE
EOC361	RAD51B	loss	RAD51B:ENST00000487861:e.8_10dup	chr14:68017394_68587697dup	frameshift_duplication	1	1	FALSE	FALSE	FALSE	NA	FALSE	TRUE	NA	FALSE	IIIA	Olaparib	FALSE
EOC361	TP53	loss	TP53:NM_000546.6:exon6:c.596G>T:p.G199V	chr17:7674935C>A	nonsynonymous_SNV	NA	NA	FALSE	FALSE	TRUE	NA	TRUE	TRUE	NA	TRUE	IVA	Adavosertib	TRUE
EOC361	TTK	gain	TTK:NM_003318.5:exon19:c.2134A>T:p.S712C	chr6:80039699A>T	nonsynonymous_SNV	NA	NA	FALSE	FALSE	FALSE	NA	FALSE	TRUE	FALSE	NA	X	BAY-1161909, BAY-1217389	FALSE
EOC363	AKT2	gain	AKT2:amp	NA	amplification	0-1	2-7	FALSE	FALSE	FALSE	TRUE	FALSE	TRUE	TRUE	NA	IVB	Capivasertib	TRUE
EOC363	CCNE1	gain	CCNE1:amp	NA	amplification	1-2	14-31	FALSE	FALSE	TRUE	TRUE	TRUE	TRUE	TRUE	NA	IVA	Lunresertib + Camonsertib	TRUE
EOC363	FGFR1	gain	FGFR1:amp	NA	amplification	0	1-11	FALSE	FALSE	FALSE	FALSE	FALSE	FALSE	NA	NA	X	AZD-4547, Brivanib, Brivanib Alaninate, ENMD-981693, Erdafitinib, Fexagratinib, Futibatinib, Infigratinib, Lucitanib, Pazopanib, Pemigatinib, Regorafenib, Rogaratinib, XL-999	FALSE
EOC363	FNTA	gain	FNTA:amp	NA	amplification	2-5	5-6	FALSE	FALSE	TRUE	FALSE	FALSE	TRUE	TRUE	NA	IVB	Tipifarnib	TRUE
EOC363	PSMC4	gain	PSMC4:amp	NA	amplification	0-1	2-7	FALSE	FALSE	FALSE	TRUE	FALSE	TRUE	TRUE	NA	X	Bortezomib, Ixazomib, Ixazomib Citrate, Oprozomib	TRUE
EOC363	PTK2	gain	PTK2:amp	NA	amplification	2-3	4-6	FALSE	FALSE	FALSE	TRUE	FALSE	TRUE	TRUE	NA	X	Defactinib, GSK-2256098	TRUE
EOC363	TP53	loss	TP53:NM_000546.6:exon10:c.1024C>T:p.R342X	chr17:7670685G>A	stopgain	NA	NA	FALSE	FALSE	TRUE	TRUE	TRUE	TRUE	NA	TRUE	IVA	Adavosertib	TRUE
EOC363	WEE1	gain	WEE1:amp	NA	amplification	1-2	2-7	FALSE	FALSE	FALSE	TRUE	FALSE	FALSE	NA	NA	X	Adavosertib	FALSE
EOC368	ERBB4	gain	ERBB4:NM_005235.3:exon8:c.908C>T:p.S303F	chr2:211713624G>A	nonsynonymous_SNV	NA	NA	FALSE	FALSE	TRUE	NA	TRUE	TRUE	TRUE	NA	IVB	Afatinib, Dacomitinib, Neratinib, Poziotinib, Vandetanib	TRUE
EOC368	FGFR1	gain	FGFR1:amp	NA	amplification	1	9	FALSE	FALSE	FALSE	NA	TRUE	FALSE	NA	NA	X	AZD-4547, Brivanib, Brivanib Alaninate, ENMD-981693, Erdafitinib, Fexagratinib, Futibatinib, Infigratinib, Lucitanib, Pazopanib, Pemigatinib, Regorafenib, Rogaratinib, XL-999	FALSE
EOC368	MAPK1	gain	MAPK1:amp	NA	amplification	1	8	FALSE	FALSE	FALSE	NA	TRUE	FALSE	NA	NA	X	Temuterkib	FALSE
EOC368	MAPK1	gain	MAPK1:ENST00000215832:antisense::MAPK1:ENST00000215832:e.2	chr22:21840839::chr22:21852486	fusion_from_unknown	3	3	FALSE	FALSE	FALSE	NA	TRUE	TRUE	FALSE	NA	X	Temuterkib	FALSE
EOC368	PDE4A	gain	PDE4A:ENST00000380702:e.1::DNMT1:ENST00000359526:antisense	chr19:10135641::chr19:10443731	truncated_transcripts	2	1	FALSE	FALSE	FALSE	NA	TRUE	TRUE	FALSE	NA	X	Roflumilast	FALSE
EOC368	PSMB8	gain	PSMB8:amp	NA	amplification	0	10	FALSE	FALSE	FALSE	NA	TRUE	FALSE	NA	NA	X	Bortezomib, Ixazomib, Ixazomib Citrate, Marizomib, Oprozomib	FALSE
EOC368	PSMB9	gain	PSMB9:amp	NA	amplification	0	10	FALSE	FALSE	FALSE	NA	TRUE	FALSE	NA	NA	X	Bortezomib, Ixazomib, Ixazomib Citrate, Marizomib, Oprozomib	FALSE
EOC368	TP53	loss	TP53:NM_000546.6:exon4:c.372_373insGC:p.T125Afs*46	chr17:7675996T>TGC	frameshift_insertion	NA	NA	FALSE	FALSE	TRUE	NA	TRUE	TRUE	NA	TRUE	IVA	Adavosertib	TRUE
EOC372	ALK	gain	ALK:ENST00000389048:e.3::ALK:ENST00000389048:antisense	chr2:29633189::chr2:29634862	truncated_transcripts	4	0	FALSE	FALSE	FALSE	NA	FALSE	TRUE	FALSE	NA	X	Alectinib, ASP-3026, Brigatinib, Ceritinib, Crizotinib, Entrectinib, Lorlatinib	FALSE
EOC372	AXL	gain	AXL:ENST00000301178:e.1_4dup	chr19:41177545_41222063dup	truncated_duplication	1-2	2	FALSE	FALSE	FALSE	NA	FALSE	TRUE	FALSE	NA	X	Gilteritinib	FALSE
EOC372	BIRC2	gain	BIRC2:amp	NA	amplification	0	47-49	TRUE	TRUE	FALSE	NA	TRUE	TRUE	TRUE	NA	X	Birinapant	TRUE
EOC372	BIRC3	gain	BIRC3:amp	NA	amplification	0	47-49	TRUE	TRUE	FALSE	NA	TRUE	TRUE	TRUE	NA	X	Birinapant	TRUE
EOC372	EPHA3	gain	EPHA3:ENST00000336596:e.3::GBE1:ENST00000429644:antisense	chr3:81653095::chr3:89246681	truncated_transcripts	4-5	2-3	FALSE	FALSE	FALSE	NA	TRUE	TRUE	FALSE	NA	X	Vandetanib	FALSE
EOC372	EPHB1	gain	EPHB1:ENST00000398015:e.1::ERC2:ENST00000288221:antisense	chr3:55923685::chr3:134920611	truncated_transcripts	1	1	FALSE	FALSE	FALSE	NA	FALSE	TRUE	FALSE	NA	X	Vandetanib	FALSE
EOC372	FNTB	gain	FNTB:ENST00000246166:e.7::NCOA2:ENST00000452400:antisense	chr8:70309670::chr14:65038129	truncated_transcripts	3	0	FALSE	FALSE	FALSE	NA	FALSE	TRUE	FALSE	NA	X	Tipifarnib	FALSE
EOC372	IDH1	gain	IDH1:ENST00000345146:e.1_3dup	chr2:208250068_208265860dup	truncated_duplication	1	2-3	FALSE	FALSE	FALSE	NA	TRUE	TRUE	FALSE	NA	X	IDH305, Ivosidenib, Olutasidenib, Vorasidenib	FALSE
EOC372	IMPDH1	gain	IMPDH1:NM_000883.4:exon6:c.502G>A:p.A168T	chr7:128401017C>T	nonsynonymous_SNV	NA	NA	FALSE	TRUE	FALSE	NA	TRUE	TRUE	TRUE	NA	X	Mycophenolate Mofetil	TRUE
EOC372	PTK2	gain	PTK2:amp	NA	amplification	2	7-8	TRUE	TRUE	FALSE	NA	TRUE	TRUE	TRUE	NA	X	Defactinib, GSK-2256098	TRUE
EOC372	TP53	loss	TP53:NM_000546.6:exon6:c.659A>G:p.Y220C	chr17:7674872T>C	nonsynonymous_SNV	NA	NA	TRUE	TRUE	FALSE	NA	TRUE	TRUE	NA	TRUE	IVA	Rezatapopt	TRUE
EOC373	AR	gain	AR:NM_000044.6:exon1:c.431G>T:p.G144V	chrX:67545577G>T	nonsynonymous_SNV	NA	NA	FALSE	FALSE	FALSE	NA	TRUE	TRUE	FALSE	NA	X	Abiraterone, Apalutamide, Darolutamide, Enzalutamide	FALSE
EOC373	EPCAM	gain	intergenic::EPCAM:ENST00000263735:e.9	chr2:46871961::chr2:47386037	fusion_from_unknown	3-7	2-7	FALSE	FALSE	TRUE	NA	TRUE	TRUE	TRUE	NA	X	Catumaxomab, Edrecolomab	TRUE
EOC373	EPHA8	gain	EPHA8:NM_020526.5:exon16:c.2878G>C:p.G960R	chr1:22601448G>C	nonsynonymous_SNV	NA	NA	FALSE	FALSE	FALSE	NA	TRUE	TRUE	FALSE	NA	IVB	Vandetanib	FALSE
EOC373	FBXW7	loss	FBXW7:ENST00000281708:e.4::TIGD4:ENST00000304337:e.2	chr4:152393424::chr4:152777871	fusion	3	1	FALSE	FALSE	FALSE	NA	FALSE	TRUE	NA	FALSE	IVA	Lunresertib + Camonsertib	FALSE
EOC373	FKBP1A	gain	FKBP1A:amp	NA	amplification	2	7	FALSE	FALSE	FALSE	NA	FALSE	FALSE	NA	NA	X	Everolimus, Sirolimus, Tacrolimus Anhydrous, Temsirolimus	FALSE
EOC373	HDAC6	gain	HDAC6:NM_006044.4:exon25:c.3097C>A:p.P1033T	chrX:48823496C>A	nonsynonymous_SNV	NA	NA	FALSE	FALSE	FALSE	NA	TRUE	FALSE	FALSE	NA	X	Belinostat, CUDC-101, Entinostat, Panobinostat, Vorinostat	FALSE
EOC373	IGF1R	gain	IGF1R:ENST00000650285:e.2::intergenic;intergenic::IGF1R:ENST00000650285:e.3	chr15:98885381::chr17:79823186;chr2:66148810::chr15:98738212	multiple	7-12	4-5	FALSE	FALSE	TRUE	NA	TRUE	TRUE	TRUE	NA	X	Cixutumumab, Figitumumab, Ganitumab	TRUE
EOC373	IGF1R	gain	IGF1R:amp	NA	amplification	1	15-17	FALSE	TRUE	TRUE	NA	TRUE	TRUE	TRUE	NA	X	Cixutumumab, Figitumumab, Ganitumab	TRUE
EOC373	KLRC1	gain	KLRC1:NM_002259.5:exon7:c.668C>T:p.S223F	chr12:10446585G>A	nonsynonymous_SNV	NA	NA	FALSE	FALSE	FALSE	NA	TRUE	FALSE	FALSE	NA	X	Monalizumab	FALSE
EOC373	MET	gain	MET:amp	NA	amplification	3	5-6	FALSE	FALSE	FALSE	NA	FALSE	TRUE	FALSE	NA	IIIA	Capmatinib, Crizotinib, Tepotinib	FALSE
EOC373	NF1	loss	NF1:ENST00000358273:e.1::intergenic	chr17:31138161::chr17:31380566	truncated_transcripts	0	1-3	FALSE	TRUE	TRUE	NA	TRUE	TRUE	NA	TRUE	IIIA	Selumetinib	TRUE
EOC373	NF1	loss	NF1:NM_001042492.3:exon38:c.5486delC:p.R1830Afs*33	chr17:31327715AC>A	frameshift_deletion	NA	NA	FALSE	FALSE	TRUE	NA	FALSE	TRUE	NA	TRUE	IIIA	Selumetinib	TRUE
EOC373	NRG1	gain	intergenic::NRG1:ENST00000405005:e.2;NRG1:ENST00000520407:e.1::KCNMA1:ENST00000286628:e.3	chr8:31828852::chr20:60697065;chr8:32362268::chr10:77389145	balanced_translocation	4	1	FALSE	FALSE	FALSE	NA	FALSE	TRUE	FALSE	NA	II	Zenocutuzumab	FALSE
EOC373	PSMB7	gain	PSMB7:ENST00000259457:e.4::GARNL3:ENST00000373387:e.2	chr9:124411336::chr9:127289781	fusion	5	1	FALSE	FALSE	TRUE	NA	FALSE	TRUE	TRUE	NA	X	Bortezomib, Ixazomib, Ixazomib Citrate, Marizomib, Oprozomib	TRUE
EOC373	PSMC2	gain	PSMC2:amp	NA	amplification	2-3	3-6	FALSE	FALSE	FALSE	NA	FALSE	FALSE	NA	NA	X	Bortezomib, Ixazomib, Ixazomib Citrate, Oprozomib	FALSE
EOC373	PSMC3	gain	intergenic::PSMC3:ENST00000298852:e.7	chr11:47422984::chr11:47962919	fusion_from_unknown	2	1	FALSE	FALSE	FALSE	NA	FALSE	TRUE	FALSE	NA	X	Bortezomib, Ixazomib, Ixazomib Citrate, Oprozomib	FALSE
EOC373	PSMD12	gain	PSMD12:amp	NA	amplification	0	12-13	FALSE	FALSE	FALSE	NA	TRUE	FALSE	NA	NA	X	Bortezomib, Ixazomib, Ixazomib Citrate, Oprozomib	FALSE
EOC373	TP53	loss	TP53:NM_000546.6:exon7:c.711G>T:p.M237I	chr17:7674252C>A	nonsynonymous_SNV	NA	NA	FALSE	TRUE	TRUE	NA	TRUE	TRUE	NA	TRUE	IVA	Adavosertib	TRUE
EOC376	ATP4A	gain	intergenic::ATP4A:ENST00000262623:e.18	chr19:35549989::chr19:35553656	fusion_from_unknown	7	5	FALSE	FALSE	FALSE	NA	TRUE	TRUE	FALSE	NA	X	Rabeprazole	FALSE
EOC376	ATR	loss	ATR:NM_001184.4:exon3:c.196G>A:p.V66M	chr3:142566217C>T	nonsynonymous_SNV	NA	NA	FALSE	FALSE	FALSE	NA	TRUE	TRUE	NA	FALSE	IIIA	Talazoparib + Enzalutamide	FALSE
EOC376	CCNE1	gain	CCNE1:amp	NA	amplification	1	14	TRUE	FALSE	FALSE	NA	TRUE	TRUE	TRUE	NA	IVA	Lunresertib + Camonsertib	TRUE
EOC376	ESR1	gain	DCC:ENST00000442544:e.2::ESR1:ENST00000427531:e.7;DCC:ENST00000582875:e.1::ESR1:ENST00000427531:e.7	chr6:152103736::chr18:52799342	fusion	4	1	FALSE	FALSE	FALSE	NA	TRUE	TRUE	FALSE	NA	IIIB	Elacestrant	FALSE
EOC376	GRIN1	gain	GRIN1:NM_007327.4:exon3:c.560G>C:p.R187P	chr9:137145892G>C	nonsynonymous_SNV	NA	NA	FALSE	FALSE	FALSE	NA	TRUE	TRUE	FALSE	NA	X	Memantine	FALSE
EOC376	IRAK4	gain	TUFT1:ENST00000368849:e.10::IRAK4:ENST00000613694:e.5	chr1:151579462::chr12:43772468	fusion	5	1	FALSE	FALSE	FALSE	NA	TRUE	TRUE	FALSE	NA	IVB	Emavusertib	FALSE
EOC376	ITGAV	gain	ITGAV:amp	NA	amplification	4	17	FALSE	FALSE	FALSE	NA	TRUE	FALSE	NA	NA	X	Etaracizumab	FALSE
EOC376	KDM6A	loss	KDM6A:ENST00000611820:e.2::PRRC2C:ENST00000647382:e.12;intergenic::KDM6A:ENST00000611820:e.3	chr1:171531714::chrX:44923484;chrX:44927301::chrX:45730636	balanced_translocation	6	3	FALSE	FALSE	FALSE	NA	TRUE	TRUE	NA	FALSE	IVA	Tazemetostat	FALSE
EOC376	PSMD4	gain	PSMD4:amp	NA	amplification	4	14	TRUE	FALSE	FALSE	NA	TRUE	TRUE	TRUE	NA	X	Bortezomib, Ixazomib, Ixazomib Citrate, Oprozomib	TRUE
EOC376	TP53	loss	TP53:NM_000546.6:exon6:c.637C>T:p.R213X	chr17:7674894G>A	stopgain	NA	NA	TRUE	FALSE	FALSE	NA	TRUE	TRUE	NA	TRUE	IVA	Adavosertib	TRUE
EOC376	XPO1	gain	XPO1:amp	NA	amplification	4	9	FALSE	FALSE	FALSE	NA	TRUE	FALSE	NA	NA	X	Selinexor	FALSE
EOC378	ADRA1A	gain	ADRA1A:NM_000680.4:exon3:c.1180G>A:p.V394I	chr8:26770370C>T	nonsynonymous_SNV	NA	NA	FALSE	FALSE	FALSE	TRUE	TRUE	FALSE	FALSE	NA	X	Carvedilol	FALSE
EOC378	BRCA2	loss	BRCA2:NM_000059.4:exon11:c.2987_2993del:p.L997Qfs*44	chr13:32337341CTCTTAGG>C	frameshift_deletion	NA	NA	FALSE	FALSE	FALSE	TRUE	FALSE	TRUE	NA	TRUE	IA	Niraparib, Olaparib, Olaparib + Bevacizumab, Rucaparib	TRUE
EOC378	BRCA2	loss	BRCA2:NM_000059.4:exon11:c.2978_2982del:p.A994Tfs*13	NA	germline	NA	NA	NA	NA	NA	NA	NA	TRUE	NA	TRUE	IA	Niraparib, Olaparib, Olaparib + Bevacizumab, Rucaparib	TRUE
EOC378	CD3E	gain	CD3E:NM_000733.4:exon7:c.417C>A:p.C139X	chr11:118313771C>A	stopgain	NA	NA	FALSE	FALSE	FALSE	TRUE	TRUE	FALSE	FALSE	NA	X	Catumaxomab, Teclistamab	FALSE
EOC378	GRIN2B	gain	GRIN2B:NM_000834.5:exon4:c.636_644del:p.D213_K215del	chr12:13753682CTTAGAATCT>C	inframe_deletion	NA	NA	FALSE	FALSE	FALSE	TRUE	TRUE	TRUE	FALSE	NA	X	Memantine	FALSE
EOC378	NF1	loss	NF1:NM_001042492.3:exon21:c.2533_2548del:p.L847Sfs*26	chr17:31229147TTGTGCCCTTGGGGGAG>T	frameshift_deletion	NA	NA	FALSE	FALSE	TRUE	TRUE	TRUE	TRUE	NA	TRUE	IIIA	Selumetinib	TRUE
EOC378	TACR1	gain	TACR1:NM_001058.4:exon1:c.331_333del:p.F111del	chr2:75198601GAAA>G	inframe_deletion	NA	NA	FALSE	FALSE	FALSE	TRUE	TRUE	TRUE	FALSE	NA	X	Aprepitant, Fosaprepitant, Fosaprepitant Dimeglumine, Netupitant	FALSE
EOC378	TEK	gain	TEK:ENST00000380036:e.2::TEK:ENST00000380036:antisense	chr9:27166842::chr9:27167907	truncated_transcripts	1	1	FALSE	FALSE	FALSE	TRUE	FALSE	FALSE	FALSE	NA	X	Altiratinib, CEP-11981, Foretinib, Glesatinib, Regorafenib, Vandetanib	FALSE
EOC378	TP53	loss	TP53:NM_000546.6:exon10:c.1024C>T:p.R342X	chr17:7670685G>A	stopgain	NA	NA	FALSE	FALSE	TRUE	TRUE	TRUE	TRUE	NA	TRUE	IVA	Adavosertib	TRUE
EOC379	BRAF	gain	MKRN1:ENST00000255977:e.4::BRAF:ENST00000646891:e.9	chr7:140456920::chr7:140790264	fusion	4-5	1-2	FALSE	TRUE	TRUE	NA	TRUE	TRUE	TRUE	NA	II	Cobimetinib, Trametinib	TRUE
EOC379	BRCA1	loss	BRCA1:NM_007294.4:exon10:c.1040delT:p.L347Rfs*27	chr17:43094490CA>C	frameshift_deletion	NA	NA	FALSE	TRUE	TRUE	NA	TRUE	TRUE	NA	TRUE	IA	Niraparib, Olaparib, Olaparib + Bevacizumab, Rucaparib	TRUE
EOC379	EPHB1	gain	EPHB1:ENST00000398015:e.3::intergenic;SRRM3:ENST00000611745:antisense::EPHB1:ENST00000398015:e.12	chr3:98113463::chr3:135086839;chr3:135200072::chr7:76211998	multiple	2	1	FALSE	FALSE	FALSE	NA	FALSE	TRUE	FALSE	NA	IVB	Vandetanib	FALSE
EOC379	KIT	gain	KIT:NM_000222.3:exon3:c.495C>A:p.D165E	chr4:54698441C>A	nonsynonymous_SNV	NA	NA	FALSE	FALSE	FALSE	NA	TRUE	FALSE	TRUE	NA	X	Avapritinib, Catequentinib, Cediranib, CM-082, Dasatinib, Dovitinib, ENMD-2076, Famitinib, Foretinib, Imatinib, Imatinib Mesylate, Nilotinib, Pazopanib, Quizartinib, Regorafenib, Ripretinib, Sorafenib, Sorafenib Tosylate, Sunitinib, Sunitinib Malate, Vatalanib, XL-820, XL-999	FALSE
EOC379	NDUFB2	gain	NDUFB2:amp	NA	amplification	2-4	3-4	FALSE	FALSE	FALSE	NA	FALSE	FALSE	NA	NA	X	Metformin	FALSE
EOC379	NDUFB2	gain	NDUFB2:ENST00000461457:e.1::DENND2A:ENST00000496613:antisense	chr7:140658572::chr7:140707711	truncated_transcripts	7	1	FALSE	FALSE	FALSE	NA	FALSE	TRUE	FALSE	NA	X	Metformin	FALSE
EOC379	NDUFS6	gain	NDUFS6:ENST00000274137:e.2::intergenic;intergenic::NDUFS6:ENST00000274137:e.2	chr4:170995697::chr5:1802399;chr4:171002322::chr5:1802059	balanced_translocation	1-2	1	FALSE	FALSE	FALSE	NA	TRUE	TRUE	FALSE	NA	X	Metformin	FALSE
EOC379	NRP1	gain	NRP1:ENST00000374867:e.2::intergenic;intergenic::NRP1:ENST00000374867:e.3	chr10:33303878::chrX:151248152;chr10:33304275::chrX:151210226	multiple	1	1	FALSE	FALSE	FALSE	NA	TRUE	TRUE	FALSE	NA	X	Vesencumab	FALSE
EOC379	NTRK3	gain	RBFOX3:ENST00000693108:e.1::NTRK3:ENST00000629765:e.6;NTRK3:ENST00000629765:e.3::intergenic	chr15:88183284::chr17:79546507;chr4:4759157::chr15:88206312	balanced_translocation	1	0	FALSE	FALSE	FALSE	NA	FALSE	TRUE	FALSE	NA	IC	Entrectinib, Larotrectinib, Repotrectinib	FALSE
EOC379	PDE4B	gain	PDE4B:ENST00000341517:e.3::SPATA6:ENST00000371847:antisense	chr1:48323463::chr1:66177574	truncated_transcripts	2-4	2-3	FALSE	FALSE	FALSE	NA	TRUE	TRUE	FALSE	NA	X	Roflumilast	FALSE
EOC379	PDE4D	gain	PDE4D:ENST00000502484:e.3dup	chr5:59692170_60172628dup	frameshift_duplication	0	1	FALSE	FALSE	FALSE	NA	TRUE	TRUE	FALSE	NA	X	Roflumilast	FALSE
EOC379	PPP5C	gain	PPP5C:ENST00000012443:e.2::P4HA1:ENST00000394890:antisense	chr10:73034873::chr19:46363134	truncated_transcripts	1	1	FALSE	FALSE	FALSE	NA	FALSE	FALSE	TRUE	NA	X	LB-100	FALSE
EOC379	PTK2	gain	PTK2:ENST00000696786:e.25::PTK2:ENST00000696786:antisense;PTK2:ENST00000696786:antisense::PTK2:ENST00000696786:e.26;PTK2:ENST00000696786:antisense::PTK2:ENST00000696786:e.22	chr8:140725793::chr8:140726901;chr8:140726097::chr8:140744868	multiple	4	2-3	FALSE	FALSE	FALSE	NA	TRUE	TRUE	FALSE	NA	X	Defactinib, GSK-2256098	FALSE
EOC379	TP53	loss	TP53:NM_000546.6:exon7:c.742C>G:p.R248G	chr17:7674221G>C	nonsynonymous_SNV	NA	NA	FALSE	TRUE	TRUE	NA	TRUE	TRUE	NA	TRUE	IVA	Adavosertib	TRUE
EOC379	ZRSR2	loss	ZNF747:ENST00000693075:antisense::ZRSR2:ENST00000307771:e.4	chr16:30541803::chrX:15801325	fusion_from_unknown	1	1	FALSE	FALSE	FALSE	NA	FALSE	TRUE	NA	FALSE	IVA	Ceralasertib	FALSE
EOC382	AKT2	gain	AKT2:amp	NA	amplification	1	5-9	TRUE	FALSE	FALSE	NA	FALSE	TRUE	TRUE	NA	IVB	Capivasertib	TRUE
EOC382	DPP4	gain	DPP4:ENST00000360534:e.2::DPP4:ENST00000360534:antisense	chr2:162068504::chr2:162080999	truncated_transcripts	7	1	FALSE	FALSE	FALSE	NA	FALSE	FALSE	FALSE	NA	X	Gemigliptin	FALSE
EOC382	GPD2	gain	GPD2:amp	NA	amplification	2-4	4-8	FALSE	FALSE	FALSE	NA	FALSE	FALSE	NA	NA	X	Metformin	FALSE
EOC382	KDR	gain	KDR:ENST00000263923:e.10::SLC4A10:ENST00000446997:e.2	chr2:161596112::chr4:55106840	fusion	2	1	FALSE	FALSE	FALSE	NA	FALSE	TRUE	FALSE	NA	IVB	Cabozantinib, Fexagratinib, Pazopanib, Regorafenib, Sorafenib, Sunitinib, Vandetanib	FALSE
EOC382	KLRC1	gain	KLRC1:amp	NA	amplification	2-3	22-23	FALSE	FALSE	FALSE	NA	TRUE	FALSE	NA	NA	X	Monalizumab	FALSE
EOC382	LAG3	gain	LAG3:amp	NA	amplification	1	10-14	FALSE	FALSE	FALSE	NA	TRUE	FALSE	NA	NA	X	Fianlimab, Relatlimab	FALSE
EOC382	NDUFA9	gain	NDUFA9:amp	NA	amplification	1	10-14	TRUE	FALSE	TRUE	NA	TRUE	TRUE	TRUE	NA	X	Metformin	TRUE
EOC382	NF1	loss	NF1:ENST00000358273:e.57::KCNJ16:ENST00000392671:e.2	chr17:31363238::chr17:70099278	fusion	2-3	0-1	FALSE	FALSE	FALSE	NA	TRUE	TRUE	NA	FALSE	IIIA	Selumetinib	FALSE
EOC382	PSMC4	gain	PSMC4:amp	NA	amplification	1	5-9	FALSE	FALSE	FALSE	NA	FALSE	TRUE	FALSE	NA	X	Bortezomib, Ixazomib, Ixazomib Citrate, Oprozomib	FALSE
EOC382	PSMD8	gain	PSMD8:amp	NA	amplification	5	5-6	FALSE	FALSE	FALSE	NA	TRUE	TRUE	FALSE	NA	X	Bortezomib, Ixazomib, Ixazomib Citrate, Oprozomib	FALSE
EOC382	PSMD8	gain	PSMD8:ENST00000215071:e.6::intergenic;CATSPERG:ENST00000409235:e.28::PSMD8:ENST00000215071:e.2	chr9:63842054::chr19:38382986;chr19:38370341::chr19:38373776	balanced_translocation	4	3	TRUE	FALSE	FALSE	NA	FALSE	TRUE	TRUE	NA	X	Bortezomib, Ixazomib, Ixazomib Citrate, Oprozomib	TRUE
EOC382	TP53	loss	TP53:NM_000546.6:exon7:c.696_697insTGACTGTACCACCATC:p.H233*	chr17:7674266G>GGATGGTGGTACAGTCA	stopgain	NA	NA	TRUE	FALSE	TRUE	NA	TRUE	TRUE	NA	TRUE	IVA	Adavosertib	TRUE
EOC386	AKT2	gain	AKT2:amp	NA	amplification	1	33-36	TRUE	FALSE	FALSE	NA	TRUE	TRUE	TRUE	NA	IVB	Capivasertib	TRUE
EOC386	GRIN2B	gain	GRIN2B:amp	NA	amplification	4	5-6	FALSE	FALSE	FALSE	NA	TRUE	FALSE	NA	NA	X	Memantine	FALSE
EOC386	HAVCR2	gain	HAVCR2:ENST00000307851:e.4::intergenic	chr5:157085139::chr5:157095878	truncated_transcripts	1	4	FALSE	FALSE	FALSE	NA	FALSE	TRUE	FALSE	NA	X	Sabatolimab	FALSE
EOC386	HTR3C	gain	intergenic::HTR3C:ENST00000318351:e.2	chr3:184051052::chr19:37548404	fusion_from_unknown	4	1	FALSE	FALSE	FALSE	NA	FALSE	TRUE	FALSE	NA	X	Ramosetron	FALSE
EOC386	KLRC1	gain	KLRC1:amp	NA	amplification	3-4	5-6	FALSE	FALSE	FALSE	NA	TRUE	FALSE	NA	NA	X	Monalizumab	FALSE
EOC386	KRAS	gain	KRAS:amp	NA	amplification	5	5-6	TRUE	FALSE	FALSE	NA	TRUE	TRUE	TRUE	NA	IVB	Adagrasib, Sotorasib	TRUE
EOC386	LAG3	gain	LAG3:amp	NA	amplification	4	5-6	FALSE	FALSE	FALSE	NA	TRUE	FALSE	NA	NA	X	Fianlimab, Relatlimab	FALSE
EOC386	NDUFA9	gain	NDUFA9:amp	NA	amplification	4	5-6	FALSE	FALSE	FALSE	NA	TRUE	TRUE	TRUE	NA	X	Metformin	TRUE
EOC386	PPP2R1A	loss	PPP2R1A:ENST00000322088:e.1del	chr19:52124422_52194226del	5prime_deletion	1	1	FALSE	FALSE	FALSE	NA	FALSE	TRUE	NA	FALSE	IVA	Lunresertib + Camonsertib	FALSE
EOC386	PSMC4	gain	PSMC4:amp	NA	amplification	1	33-36	TRUE	FALSE	FALSE	NA	TRUE	TRUE	TRUE	NA	X	Bortezomib, Ixazomib, Ixazomib Citrate, Oprozomib	TRUE
EOC386	PSMD8	gain	PSMD8:amp	NA	amplification	1	24-26	TRUE	FALSE	FALSE	NA	TRUE	TRUE	TRUE	NA	X	Bortezomib, Ixazomib, Ixazomib Citrate, Oprozomib	TRUE
EOC386	TP53	loss	TP53:NM_000546.6:exon5:c.524G>A:p.R175H	chr17:7675088C>T	nonsynonymous_SNV	NA	NA	TRUE	FALSE	FALSE	NA	TRUE	TRUE	NA	TRUE	IVA	Adavosertib	TRUE
EOC386	TXNRD1	gain	TXNRD1:ENST00000525566:e.13::RIMBP2:ENST00000690449:e.2	chr12:104330706::chr12:130726193	fusion	2-3	1	FALSE	FALSE	FALSE	NA	TRUE	TRUE	TRUE	NA	IVB	Arsenic Trioxide	TRUE
EOC388	EPHA10	gain	EPHA10:amp	NA	amplification	1	10-14	FALSE	FALSE	FALSE	NA	TRUE	FALSE	NA	NA	X	Vandetanib	FALSE
EOC388	NDUFAF4	gain	NDUFAF4:amp	NA	amplification	1-4	4-5	FALSE	FALSE	TRUE	NA	FALSE	TRUE	TRUE	NA	X	Metformin	TRUE
EOC388	NDUFC2	gain	NDUFC2:amp	NA	amplification	0-1	5-7	FALSE	FALSE	TRUE	NA	FALSE	TRUE	TRUE	NA	X	Metformin	TRUE
EOC388	NDUFS5	gain	NDUFS5:amp	NA	amplification	1	8-11	FALSE	FALSE	FALSE	NA	TRUE	FALSE	NA	NA	X	Metformin	FALSE
EOC388	PPP5C	gain	PPP5C:amp	NA	amplification	1	10-15	FALSE	FALSE	FALSE	NA	TRUE	FALSE	NA	NA	X	LB-100	FALSE
EOC388	TP53	loss	TP53:NM_000546.6:exon4:c.354_360del:p.A119Lfs*2	chr17:7676007:GACTTGGCT>A	frameshift_deletion	NA	NA	TRUE	FALSE	TRUE	NA	TRUE	TRUE	NA	TRUE	IVA	Adavosertib	TRUE
EOC389	CHEK2	loss	intergenic::CHEK2:ENST00000404276:e.6;CHEK2:ENST00000404276:e.5::LARGE1:ENST00000397394:e.3;CHEK2:ENST00000404276:e.5::LARGE1:ENST00000476315:e.2	chr22:28715452::chr22:28870755;chr22:28715751::chr22:33758198	balanced_translocation	1	2-4	FALSE	FALSE	FALSE	NA	TRUE	TRUE	NA	FALSE	IIIA	Olaparib, Talazoparib + Enzalutamide	FALSE
EOC389	EPHA6	gain	intergenic::EPHA6:ENST00000389672:e.2	chr3:96692751::chr3:96842160	fusion_from_unknown	5	1	FALSE	FALSE	FALSE	NA	FALSE	TRUE	FALSE	NA	IVB	Vandetanib	FALSE
EOC389	ERBB4	gain	ERBB4:ENST00000342788:e.8_19del	chr2:211590922_211718414del	frameshift_deletion	4	0	FALSE	FALSE	FALSE	NA	FALSE	TRUE	FALSE	NA	X	AC-480, Afatinib, BMS-690514, Dacomitinib, Dacomitinib Anhydrous, JNJ-26483327, Neratinib, Poziotinib, Vandetanib	FALSE
EOC389	MDM2	gain	MDM2:amp	NA	amplification	4-5	9	FALSE	TRUE	TRUE	NA	TRUE	TRUE	TRUE	NA	IVB	Brigimadlin, Milademetan	TRUE
EOC389	NDUFA4L2	gain	NDUFA4L2:amp	NA	amplification	4-5	7	FALSE	FALSE	FALSE	NA	TRUE	FALSE	NA	NA	X	Metformin	FALSE
EOC389	RAD51B	loss	RAD51B:ENST00000487861:e.8_10del	chr14:68125512_68571364del	frameshift_deletion	2-4	1	FALSE	FALSE	FALSE	NA	FALSE	TRUE	NA	FALSE	IIIA	Olaparib	FALSE
EOC389	TEK	gain	TEK:ENST00000380036:e.3::MOB3B:ENST00000262244:antisense;TEK:ENST00000519080:e.1::MOB3B:ENST00000262244:antisense	chr9:27168542::chr9:27448817	truncated_transcripts	3	1	FALSE	FALSE	FALSE	NA	FALSE	TRUE	FALSE	NA	X	Altiratinib, CEP-11981, Foretinib, Glesatinib, Regorafenib, Vandetanib	FALSE
EOC389	TP53	loss	TP53:NM_000546.6:exon8:c.817C>T:p.R273C	chr17:7673803G>A	nonsynonymous_SNV	NA	NA	FALSE	TRUE	TRUE	NA	TRUE	TRUE	NA	TRUE	IVA	Adavosertib	TRUE
EOC390	FANCA	loss	FANCA:NM_000135.4:exon41:c.4093G>A:p.V1365I	chr16:89739207C>T	nonsynonymous_SNV	NA	NA	FALSE	FALSE	FALSE	NA	FALSE	FALSE	NA	TRUE	X	Talazoparib	FALSE
EOC390	IGF1R	gain	MEGF11:ENST00000395614:antisense::IGF1R:ENST00000650285:e.3	chr15:65899183::chr15:98885845	fusion_from_unknown	2	1	FALSE	FALSE	FALSE	NA	FALSE	TRUE	FALSE	NA	X	Cixutumumab, Figitumumab, Ganitumab	FALSE
EOC390	PSMC2	gain	PSMC2:ENST00000292644:e.1_12dup	chr7:103331226_103368294dup	truncated_duplication	1	1	FALSE	FALSE	FALSE	NA	FALSE	TRUE	FALSE	NA	X	Bortezomib, Ixazomib, Ixazomib Citrate, Oprozomib	FALSE
EOC390	PTEN	loss	PTEN:ENST00000371953:e.4dup	chr10:87927178_87932527dup	frameshift_duplication	0	1	FALSE	TRUE	FALSE	NA	FALSE	TRUE	NA	TRUE	IIIA	Capivasertib + Fulvestrant	TRUE
EOC390	RAD54L	loss	RAD54L:ENST00000371975:e.9_10dup	chr1:46267542_46270670dup	inframe_duplication	1	1	FALSE	FALSE	FALSE	NA	FALSE	TRUE	NA	FALSE	IIIA	Olaparib	FALSE
EOC390	TP53	loss	TP53:NM_000546.6:exon6:c.637C>T:p.R213X	chr17:7674894G>A	stopgain	NA	NA	FALSE	TRUE	TRUE	NA	TRUE	TRUE	NA	TRUE	IVA	Adavosertib	TRUE
EOC392	AKT2	gain	AKT2:amp	NA	amplification	1	9	FALSE	TRUE	FALSE	NA	TRUE	TRUE	TRUE	NA	IVB	Capivasertib	TRUE
EOC392	ATR	loss	ATR:NM_001184.4:exon19:c.3716T>C:p.I1239T	chr3:142538491A>G	nonsynonymous_SNV	NA	NA	FALSE	FALSE	FALSE	NA	TRUE	FALSE	NA	FALSE	X	Ceralasertib, Talazoparib	FALSE
EOC392	HDAC1	gain	HDAC1:ENST00000373548:e.1::CBFB:ENST00000412916:antisense	chr1:32299987::chr16:67070823	truncated_transcripts	3	0	FALSE	FALSE	FALSE	NA	TRUE	TRUE	FALSE	NA	X	Belinostat, CUDC-101, Entinostat, Mocetinostat, Panobinostat, Vorinostat	FALSE
EOC392	PARP3	gain	PARP3:NM_001003931.4:exon6:c.761C>T:p.S254F	chr3:51945124C>T	nonsynonymous_SNV	NA	NA	FALSE	TRUE	FALSE	NA	TRUE	TRUE	TRUE	NA	IVB	Olaparib, Rucaparib	TRUE
EOC392	PDE4D	gain	NDUFAF2:ENST00000296597:e.2::PDE4D:ENST00000340635:antisense	chr5:60271149::chr5:61090361	truncated_transcripts	4	2	FALSE	FALSE	FALSE	NA	TRUE	FALSE	FALSE	NA	X	Roflumilast	FALSE
EOC392	PSMB4	gain	PSMB4:amp	NA	amplification	3	10	FALSE	TRUE	FALSE	NA	TRUE	TRUE	TRUE	NA	X	Bortezomib, Ixazomib, Ixazomib Citrate, Marizomib, Oprozomib	TRUE
EOC392	PSMD4	gain	PSMD4:amp	NA	amplification	3	10	FALSE	TRUE	FALSE	NA	TRUE	TRUE	TRUE	NA	X	Bortezomib, Ixazomib, Ixazomib Citrate, Oprozomib	TRUE
EOC392	TP53	loss	TP53:NM_000546.6:exon5:c.514G>T:p.V172F	chr17:7675098C>A	nonsynonymous_SNV	NA	NA	FALSE	TRUE	FALSE	NA	TRUE	TRUE	NA	TRUE	IVA	Adavosertib	TRUE
EOC400	AR	gain	intergenic::AR:ENST00000374690:e.3	chrX:67681447::chrX:67762188	fusion_from_unknown	4	1	FALSE	FALSE	FALSE	NA	FALSE	TRUE	FALSE	NA	X	Abiraterone, Apalutamide, Darolutamide, Enzalutamide	FALSE
EOC400	ARID1A	loss	intergenic::ARID1A:ENST00000324856:e.2	chr1:26693166::chr1:89443651	fusion_from_unknown	1-3	1-3	FALSE	FALSE	FALSE	NA	TRUE	TRUE	NA	FALSE	IVA	PLX2853, Tazemetostat	FALSE
EOC400	CCDC6	gain	MRLN:ENST00000414264:e.1::CCDC6:ENST00000263102:e.4	chr10:59741545::chr10:59831354	fusion	2	1	FALSE	FALSE	FALSE	NA	FALSE	TRUE	FALSE	NA	IVB	Pralsetinib, Selpercatinib	FALSE
EOC400	CDK6	gain	CDK6:ENST00000424848:e.4::intergenic;intergenic::CDK6:ENST00000424848:e.5	chr7:92707818::chr15:47095366;chr7:92713479::chr15:47095151	balanced_translocation	3	1	FALSE	FALSE	FALSE	NA	FALSE	TRUE	FALSE	NA	IVB	Abemaciclib, Palbociclib, Ribociclib	FALSE
EOC400	EPHA6	gain	EPHA6:ENST00000389672:e.11_14dup	chr3:97492601_97645119dup	frameshift_duplication	0-2	1	FALSE	FALSE	FALSE	NA	TRUE	TRUE	FALSE	NA	X	Vandetanib	FALSE
EOC400	ERBB4	gain	ERBB4:ENST00000342788:e.2_20del	chr2:211468993_212295618del	frameshift_deletion	2	1	FALSE	FALSE	FALSE	NA	FALSE	TRUE	FALSE	NA	X	AC-480, Afatinib, BMS-690514, Dacomitinib, Dacomitinib Anhydrous, JNJ-26483327, Neratinib, Poziotinib, Vandetanib	FALSE
EOC400	FKBP1A	gain	intergenic::FKBP1A:ENST00000400137:e.3	chr20:1353761::chr20:1380344	fusion_from_unknown	2	1	FALSE	FALSE	FALSE	NA	FALSE	TRUE	FALSE	NA	IVB	Everolimus, ABI-009, Temsirolimus	FALSE
EOC400	GPD2	gain	intergenic::GPD2:ENST00000438166:e.4;GPD2:ENST00000438166:e.3::intergenic	chr2:149607486::chr2:156506781;chr2:149613666::chr2:156508883	balanced_translocation	1-2	1-2	FALSE	FALSE	FALSE	NA	TRUE	TRUE	FALSE	NA	X	Metformin	FALSE
EOC400	GRIN2B	gain	GRIN2B:ENST00000609686:e.5dup	chr12:13671180_13680468dup	frameshift_duplication	1-2	1	FALSE	FALSE	FALSE	NA	TRUE	TRUE	FALSE	NA	X	Memantine	FALSE
EOC400	HTR3A	gain	HTR3A:ENST00000504030:e.4::TNS3:ENST00000311160:e.3	chr7:47517079::chr11:113981614	fusion	2	0	FALSE	FALSE	FALSE	NA	FALSE	TRUE	FALSE	NA	X	Dolasetron, Dolasetron Mesylate, Granisetron, Granisetron Hydrochloride, Ondansetron, Ondansetron Hydrochloride, Palonosetron, Palonosetron Hydrochloride, Ramosetron	FALSE
EOC400	MKNK1	gain	MKNK1:ENST00000532110:e.3dup	chr1:46580755_46585056dup	inframe_duplication	3	1	FALSE	FALSE	FALSE	NA	FALSE	TRUE	FALSE	NA	X	Tomivosertib	FALSE
EOC400	NF1	loss	NF1:ENST00000358273:e.47_48dup	chr17:31339428_31343383dup	frameshift_duplication	0	1	TRUE	FALSE	TRUE	NA	TRUE	TRUE	NA	TRUE	IIIA	Selumetinib	TRUE
EOC400	NTRK3	gain	NTRK3:NM_001012338.3:exon11:c.1213G>T:p.D405Y	chr15:88128726C>A	nonsynonymous_SNV	NA	NA	FALSE	FALSE	FALSE	NA	FALSE	TRUE	FALSE	NA	IIIB	Entrectinib, Larotrectinib, Repotrectinib, Selitrectinib	FALSE
EOC400	PDE10A	gain	PDE10A:ENST00000647768:e.2dup	chr6:165681774_165712631dup	multiple	0-1	0-1	FALSE	FALSE	FALSE	NA	FALSE	TRUE	FALSE	NA	X	PBF-999	FALSE
EOC400	PSMA6	gain	PSMA6:amp	NA	amplification	0	2-16	FALSE	FALSE	FALSE	NA	FALSE	FALSE	NA	NA	X	Bortezomib, Ixazomib, Ixazomib Citrate, Marizomib, Oprozomib	FALSE
EOC400	PTEN	loss	PTEN:del	NA	deletion	0	NA	TRUE	FALSE	TRUE	NA	FALSE	TRUE	NA	TRUE	IIIA	Capivasertib + Fulvestrant	TRUE
EOC400	TP53	loss	TP53:NM_000546.6:exon5:c.523C>G:p.R175G	chr17:7675089G>C	nonsynonymous_SNV	NA	NA	TRUE	FALSE	TRUE	NA	TRUE	TRUE	NA	TRUE	IVA	Adavosertib	TRUE
EOC41	BRCA2	loss	BRCA2:NM_000059:g.32368097_32375637dup:c.8332_8632dup:p.E2878Dfs*4	NA	somatic_sv	0	NA	TRUE	FALSE	TRUE	FALSE	TRUE	TRUE	NA	TRUE	IA	Niraparib, Olaparib, Olaparib + Bevacizumab, Rucaparib	TRUE
EOC41	CD47	gain	CD47:amp	NA	amplification	2	7-8	FALSE	FALSE	FALSE	NA	TRUE	FALSE	NA	NA	X	Magrolimab	FALSE
EOC41	EML4	gain	EML4:NM_019063.5:exon22:c.2432_2450del:p.K812Ifs*32	chr2:42328975TGTAAAGTCCATCTGTTTCA>T	frameshift_deletion	NA	NA	FALSE	FALSE	FALSE	NA	FALSE	FALSE	FALSE	NA	X	Alectinib, Ceritinib, Crizotinib, Lorlatinib	FALSE
EOC41	EPHB1	gain	STXBP5L:ENST00000471454:antisense::EPHB1:ENST00000398015:e.2	chr3:121118616::chr3:134917993	fusion_from_unknown	5	1	FALSE	FALSE	FALSE	NA	FALSE	TRUE	FALSE	NA	IVB	Vandetanib	FALSE
EOC41	KRAS	gain	KRAS:ENST00000311936:e.3_4del	chr12:25215100_25231927del	inframe_deletion	2-3	1-2	FALSE	FALSE	FALSE	NA	FALSE	TRUE	FALSE	NA	IIIA	Cobimetinib, Trametinib	FALSE
EOC41	NRG1	gain	TEX15:ENST00000643185:antisense::NRG1:ENST00000405005:e.8	chr8:30889627::chr8:32748791	fusion_from_unknown	1	3-4	FALSE	FALSE	FALSE	NA	TRUE	TRUE	FALSE	NA	II	Zenocutuzumab	FALSE
EOC41	PDE4D	gain	PDE4D:ENST00000340635:e.15del	chr5:58970841_58971055del	inframe_deletion	2	1	FALSE	FALSE	FALSE	NA	FALSE	TRUE	FALSE	NA	X	Roflumilast	FALSE
EOC41	PTK2	gain	PTK2:amp	NA	amplification	3-4	4	TRUE	FALSE	FALSE	NA	FALSE	TRUE	TRUE	NA	X	Defactinib, GSK-2256098	TRUE
EOC41	TP53	loss	TP53:NM_000546.6:exon5:c.527G>T:p.C176F	chr17:7675085C>A	nonsynonymous_SNV	NA	NA	TRUE	FALSE	TRUE	NA	TRUE	TRUE	NA	TRUE	IVA	Adavosertib	TRUE
EOC41	TSC1	loss	TSC1:ENST00000298552:e.11_14dup;TSC1:ENST00000298552:e.11::intergenic;TSC1:ENST00000298552:e.11::KCNH6:ENST00000314672:antisense;KCNH6:ENST00000314672:antisense::TSC1:ENST00000298552:e.14	chr9:132906817_132911018dup;chr9:132910786::chr17:63505586;chr9:132911023::chr17:63526312;chr9:132906818::chr17:63526307;chr9:132906857::chr17:63525898	multiple	0	NA	TRUE	FALSE	TRUE	NA	TRUE	TRUE	NA	TRUE	IIIA	Everolimus	TRUE
EOC41	TSC2	loss	intergenic::TSC2:ENST00000219476:e.37	chr16:2086166::chr16:14321645	fusion_from_unknown	1-2	1	FALSE	FALSE	FALSE	NA	TRUE	TRUE	NA	FALSE	IIIA	Everolimus	FALSE
EOC412	COL4A4	gain	COL4A4:NM_000092.5:exon15:c.881G>A:p.G294D	chr2:227102838C>T	nonsynonymous_SNV	NA	NA	FALSE	FALSE	FALSE	NA	TRUE	FALSE	FALSE	NA	X	TRC-093	FALSE
EOC412	FRK	gain	FRK:NM_002031.3:exon8:c.1352G>T:p.R451I	chr6:115942580C>A	nonsynonymous_SNV	NA	NA	FALSE	FALSE	TRUE	NA	TRUE	TRUE	TRUE	NA	IVB	Dasatinib, Regorafenib	TRUE
EOC412	GRIN2A	gain	GRIN2A:ENST00000330684:e.2::intergenic	chr8:139242952::chr16:9963436	truncated_transcripts	2	1	FALSE	FALSE	FALSE	NA	TRUE	FALSE	FALSE	NA	X	Memantine	FALSE
EOC412	NRG1	gain	NRG1:ENST00000356819:e.7::CHD7:ENST00000423902:antisense;SARAF:ENST00000256255:e.1::NRG1:ENST00000356819:e.6;SARAF:ENST00000256255:e.1::NRG1:ENST00000520407:e.4	chr8:32746572::chr8:60813694;chr8:30074715::chr8:32700072	balanced_translocation	2	1	FALSE	FALSE	TRUE	NA	TRUE	TRUE	TRUE	NA	II	Zenocutuzumab	TRUE
EOC412	RAD51C	loss	RAD51C:NM_058216.3:exon1:c.90delG:p.F32Sfs*8	NA	germline	NA	NA	NA	NA	NA	NA	NA	TRUE	NA	TRUE	IIIA	Olaparib, Talazoparib + Enzalutamide	TRUE
EOC412	TP53	loss	TP53:NM_000546.6:exon5:c.524G>A:p.R175H	chr17:7675088C>T	nonsynonymous_SNV	NA	NA	FALSE	FALSE	TRUE	NA	TRUE	TRUE	NA	TRUE	IVA	Adavosertib	TRUE
EOC412	XPO1	gain	XPO1:ENST00000401558:e.1_4del	chr2:61514601_61544162del	5prime_deletion	2	1	FALSE	FALSE	FALSE	NA	TRUE	TRUE	FALSE	NA	X	Selinexor	FALSE
EOC415	AKT3	gain	AKT3:NM_005465.7:exon11:c.1163G>A:p.R388H	chr1:243552729C>T	splicing	NA	NA	FALSE	FALSE	FALSE	TRUE	TRUE	FALSE	FALSE	NA	X	Afuresertib, Capivasertib, Ipatasertib, MK-2206, Triciribine Phosphate, Uprosertib	FALSE
EOC415	FN1	gain	FN1:ENST00000354785:e.1_44del	chr2:215364517_215441683del	5prime_deletion	3	1	FALSE	FALSE	FALSE	FALSE	FALSE	TRUE	FALSE	NA	X	L19SIP 131I	FALSE
EOC415	GRIN1	gain	NELFB:ENST00000343053:e.4::GRIN1:ENST00000371560:e.20	chr9:137167490::chr9:137257120	fusion	3	0	FALSE	TRUE	FALSE	FALSE	FALSE	TRUE	TRUE	NA	X	Memantine	TRUE
EOC415	GRIN2B	gain	GRIN2B:amp	NA	amplification	1-3	5	FALSE	FALSE	FALSE	FALSE	FALSE	FALSE	NA	NA	X	Memantine	FALSE
EOC415	HDAC7	gain	HDAC7:ENST00000080059:e.1::MYH13:ENST00000252172:antisense	chr12:47805075::chr17:10351227	truncated_transcripts	3	0	FALSE	FALSE	FALSE	FALSE	FALSE	TRUE	FALSE	NA	X	Belinostat, CUDC-101, Entinostat, Panobinostat	FALSE
EOC415	KLRC1	gain	KLRC1:amp	NA	amplification	1-3	5	FALSE	FALSE	FALSE	FALSE	FALSE	FALSE	NA	NA	X	Monalizumab	FALSE
EOC415	LAG3	gain	LAG3:amp	NA	amplification	1-3	5	FALSE	FALSE	FALSE	FALSE	FALSE	FALSE	NA	NA	X	Fianlimab, Relatlimab	FALSE
EOC415	LYN	gain	LYN:amp	NA	amplification	2-3	4-7	FALSE	FALSE	FALSE	FALSE	FALSE	FALSE	NA	NA	X	Bosutinib, Dasatinib, ENMD-981693, Ilorasertib, JNJ-26483327	FALSE
EOC415	MAPK1	gain	MAPK1:ENST00000215832:e.1::TOP3B:ENST00000357179:e.12	chr22:21853341::chr22:21963339	fusion	2	1	FALSE	TRUE	FALSE	FALSE	FALSE	TRUE	TRUE	NA	X	Temuterkib	TRUE
EOC415	MLH1	loss	LRRFIP2:ENST00000336686:antisense::MLH1:ENST00000231790:e.14	chr3:37035254::chr3:37095577	fusion_from_unknown	2-3	1	FALSE	FALSE	FALSE	FALSE	FALSE	TRUE	NA	FALSE	IIIA	Talazoparib + Enzalutamide	FALSE
EOC415	NDUFA13	gain	NDUFA13:amp	NA	amplification	1-2	3-7	FALSE	FALSE	FALSE	FALSE	FALSE	FALSE	NA	NA	X	Metformin	FALSE
EOC415	NDUFA9	gain	NDUFA9:amp	NA	amplification	1-3	5	FALSE	FALSE	TRUE	FALSE	FALSE	TRUE	TRUE	NA	X	Metformin	TRUE
EOC415	NDUFS1	gain	NDUFS1:NM_005006.7:exon16:c.1796C>G:p.T599S	chr2:206127885G>C	nonsynonymous_SNV	NA	NA	FALSE	TRUE	FALSE	FALSE	FALSE	TRUE	TRUE	NA	X	Metformin	TRUE
EOC415	NRG1	gain	intergenic::NRG1:ENST00000405005:e.2;PDZRN4:ENST00000402685:antisense::NRG1:ENST00000405005:e.2	chr8:21617218::chr8:32519013;chr8:32299426::chr12:41330613	multiple	1-3	1	FALSE	FALSE	FALSE	TRUE	TRUE	TRUE	FALSE	NA	II	Zenocutuzumab	FALSE
EOC415	PTK2	gain	AGO2:ENST00000220592:e.1::PTK2:ENST00000696786:e.36;PTK2:ENST00000696786:e.9_10del	chr8:140632623::chr8:140660271;chr8:140816299_140824052del	multiple	4	0-1	FALSE	FALSE	FALSE	TRUE	FALSE	TRUE	FALSE	NA	X	Defactinib, GSK-2256098	FALSE
EOC415	RAD51B	loss	RAD51B:ENST00000471583:e.7::intergenic;EIF3H:ENST00000521861:antisense::RAD51B:ENST00000471583:e.8;intergenic::RAD51B:ENST00000471583:e.8	chr8:110202102::chr14:68192780;chr8:116677864::chr14:68192399;chr14:68192786::chr14:76091264	multiple	2	NA	FALSE	FALSE	FALSE	TRUE	FALSE	TRUE	NA	FALSE	IIIA	Olaparib	FALSE
EOC415	SMARCB1	loss	SMARCB1:NM_003073.5:exon9:c.1130G>A:p.R377H	chr22:23834152G>A	nonsynonymous_SNV	NA	NA	FALSE	FALSE	FALSE	FALSE	FALSE	TRUE	NA	FALSE	X	Tazemetostat	FALSE
EOC415	TP53	loss	TP53:NM_000546.6:exon6:c.590T>G:p.V197G	chr17:7674941A>C	nonsynonymous_SNV	NA	NA	FALSE	TRUE	TRUE	TRUE	TRUE	TRUE	NA	TRUE	IVA	Adavosertib	TRUE
EOC420	AKT1	gain	AKT1:ENST00000649815:e.14::intergenic	chr14:104770696::chr14:106038513	truncated_transcripts	1	1	FALSE	FALSE	FALSE	TRUE	TRUE	TRUE	FALSE	NA	X	Afuresertib, Capivasertib, Fulvestrant, Ipatasertib, MK-2206, Triciribine Phosphate, Uprosertib	FALSE
EOC420	AKT2	gain	AKT2:ENST00000392038:e.14del	chr19:40232743_40232790del	inframe_deletion	1	0	FALSE	FALSE	FALSE	FALSE	FALSE	TRUE	FALSE	NA	IVB	Capivasertib	FALSE
EOC420	AKT3	gain	AKT3:ENST00000673466:e.7_8dup	chr1:243612318_243633009dup	inframe_duplication	2	0	FALSE	FALSE	FALSE	TRUE	FALSE	TRUE	FALSE	NA	IVB	Capivasertib	FALSE
EOC420	ALK	gain	ALK:ENST00000389048:e.11::intergenic;intergenic::ALK:ENST00000389048:e.10	chr2:29269206::chr20:40628111;chr2:29275927::chr20:40628075	balanced_translocation	1	1	FALSE	FALSE	FALSE	TRUE	TRUE	TRUE	FALSE	NA	IIIA	Crizotinib, Alectinib, Brigatinib, Ceritinib, Lorlatinib	FALSE
EOC420	ATM	loss	ATM:ENST00000675843:e.23_26del	chr11:108276705_108286122del	frameshift_deletion	1	1	FALSE	FALSE	FALSE	TRUE	TRUE	TRUE	NA	FALSE	IIIA	Olaparib, Talazoparib + Enzalutamide	FALSE
EOC420	DLL4	gain	DLL4:ENST00000249749:e.1_5del	chr15:40924172_40932269del	5prime_deletion	1	1	FALSE	FALSE	FALSE	TRUE	TRUE	TRUE	FALSE	NA	X	Enoticumab	FALSE
EOC420	ENG	gain	CNGB1:ENST00000251102:e.12::ENG:ENST00000373203:e.9	chr9:127821267::chr16:57952190	fusion	2	1	FALSE	FALSE	FALSE	TRUE	TRUE	TRUE	FALSE	NA	X	Carotuximab	FALSE
EOC420	EPHA2	gain	VWC2L:ENST00000312504:antisense::EPHA2:ENST00000358432:e.2	chr1:16156590::chr2:214478317	fusion_from_unknown	1	1	FALSE	FALSE	FALSE	TRUE	TRUE	TRUE	FALSE	NA	IVB	Dasatinib, Regorafenib, Vandetanib	FALSE
EOC420	ERBB4	gain	ERBB4:ENST00000342788:e.6_25del	chr2:211393907_211747319del	frameshift_deletion	1	1	FALSE	FALSE	FALSE	TRUE	TRUE	TRUE	FALSE	NA	X	AC-480, Afatinib, BMS-690514, Dacomitinib, Dacomitinib Anhydrous, JNJ-26483327, Neratinib, Poziotinib, Vandetanib	FALSE
EOC420	FGFR1	gain	FGFR1:ENST00000447712:e.7::DDX39A:ENST00000242776:e.4	chr8:38422607::chr19:14411627	fusion	1	1	FALSE	FALSE	FALSE	TRUE	FALSE	TRUE	FALSE	NA	IIIA	Pemigatinib	FALSE
EOC420	HDAC7	gain	HDAC7:ENST00000080059:e.1::RAPGEF3:ENST00000449771:e.2	chr12:47773932::chr12:47810882	fusion	1	1	FALSE	FALSE	FALSE	TRUE	TRUE	TRUE	FALSE	NA	X	Belinostat, CUDC-101, Entinostat, Panobinostat	FALSE
EOC420	HTR3C	gain	HTR3C:amp	NA	amplification	4	4-5	FALSE	FALSE	FALSE	TRUE	FALSE	FALSE	NA	NA	X	Ramosetron	FALSE
EOC420	HTR3D	gain	HTR3D:amp	NA	amplification	4	4-5	FALSE	FALSE	FALSE	TRUE	FALSE	FALSE	NA	NA	X	Ramosetron	FALSE
EOC420	HTR3E	gain	HTR3E:amp	NA	amplification	4	4-5	FALSE	FALSE	FALSE	TRUE	FALSE	FALSE	NA	NA	X	Ramosetron	FALSE
EOC420	NAE1	gain	NAE1:ENST00000290810:e.19::NAE1:ENST00000290810:antisense;NAE1:ENST00000290810:e.18::NAE1:ENST00000290810:antisense	chr16:66804931::chr16:66805842	truncated_transcripts	1	1	FALSE	FALSE	FALSE	TRUE	TRUE	TRUE	FALSE	NA	X	Pevonedistat	FALSE
EOC420	PIM3	gain	MOV10L1:ENST00000262794:e.1::PIM3:ENST00000360612:e.2	chr22:49955586::chr22:50091017	fusion	1	1	FALSE	FALSE	FALSE	TRUE	TRUE	TRUE	FALSE	NA	X	AZD-1208	FALSE
EOC420	PSMA6	gain	intergenic::PSMA6:ENST00000261479:e.7	chr14:35315988::chr14:35497039	fusion_from_unknown	1	1	FALSE	FALSE	FALSE	TRUE	TRUE	TRUE	FALSE	NA	X	Bortezomib, Ixazomib, Ixazomib Citrate, Marizomib, Oprozomib	FALSE
EOC420	PSMD14	gain	TBR1:ENST00000389554:e.1::PSMD14:ENST00000409682:e.12	chr2:161409610::chr2:161416399	fusion	1	0-1	FALSE	FALSE	FALSE	TRUE	TRUE	TRUE	FALSE	NA	X	Bortezomib, Ixazomib, Ixazomib Citrate, Oprozomib	FALSE
EOC420	PSMD2	gain	PSMD2:amp	NA	amplification	4	4-5	FALSE	FALSE	FALSE	TRUE	FALSE	TRUE	TRUE	NA	X	Bortezomib, Ixazomib, Ixazomib Citrate, Oprozomib	TRUE
EOC420	RAD51B	loss	STXBP1:ENST00000373299:e.7::RAD51B:ENST00000471583:e.8	chr9:127663243::chr14:68270159	fusion	1	1	FALSE	FALSE	FALSE	TRUE	TRUE	TRUE	NA	FALSE	IIIA	Olaparib	FALSE
EOC420	TP53	loss	TP53:NM_000546.6:exon7:c.746G>T:p.R249M	chr17:7674217C>A	nonsynonymous_SNV	NA	NA	TRUE	TRUE	FALSE	TRUE	TRUE	TRUE	NA	TRUE	IVA	Adavosertib	TRUE
EOC423	AKT3	gain	PSMD7:ENST00000219313:antisense::AKT3:ENST00000673466:e.13;AKT3:ENST00000673466:antisense::PSMD7:ENST00000219313:e.7	chr1:243536931::chr16:74304881	fusion_from_unknown	4	0	FALSE	FALSE	FALSE	NA	FALSE	TRUE	FALSE	NA	IVB	Capivasertib	FALSE
EOC423	ATP4A	gain	ATP4A:.	chr19:35550829C>G	splicing	NA	NA	FALSE	FALSE	FALSE	NA	FALSE	FALSE	FALSE	NA	X	Rabeprazole	FALSE
EOC423	ATR	loss	ATR:NM_001184.4:exon12:c.2615C>G:p.T872R	chr3:142553658G>C	nonsynonymous_SNV	NA	NA	FALSE	FALSE	FALSE	NA	FALSE	TRUE	NA	FALSE	IIIA	Talazoparib + Enzalutamide	FALSE
EOC423	BRAF	gain	DENND2A:ENST00000496613:e.6::BRAF:ENST00000646891:e.4	chr7:140573997::chr7:140821197	fusion	6	1	FALSE	FALSE	FALSE	NA	FALSE	TRUE	FALSE	NA	II	Cobimetinib, Trametinib	FALSE
EOC423	CDK12	loss	CDK12:NM_016507.4:exon7:c.2644C>T:p.R882W	chr17:39509739C>T	nonsynonymous_SNV	NA	NA	TRUE	FALSE	TRUE	NA	TRUE	TRUE	NA	TRUE	IIIA	Olaparib, Talazoparib + Enzalutamide	TRUE
EOC423	CSF1R	gain	CSF1R:amp	NA	amplification	1	4-9	FALSE	FALSE	FALSE	NA	FALSE	FALSE	NA	NA	X	AMG-820, Cabiralizumab, Elzovantinib, Emactuzumab, ENMD-2076, Fexagratinib, Pazopanib, Quizartinib, Sunitinib, Sunitinib Malate, Vatalanib	FALSE
EOC423	EPHA3	gain	EPHA3:ENST00000336596:e.3::intergenic	chr3:84152519::chr3:89314234	truncated_transcripts	3-4	1-2	FALSE	FALSE	FALSE	NA	TRUE	TRUE	FALSE	NA	X	Vandetanib	FALSE
[truncated: 2,449 more rows]
