# Supplementary material
Source: Research Square preprint supplement (doi:10.21203/rs.3.rs-8860995/v1)
Supplement: Supplementary file 2 [file 864b943572423cec5ac8230d.pdf]

# The STROBE reporting checklist

For checking that observational epidemiology research articles can be understood and used by everyone

## Note

If you have not used a reporting guideline before, read about [how and why to use them](#) and check whether STROBE is the [most applicable reporting guideline](#) for your work.

Reporting guidelines are most useful when used early in research. When writing a manuscript or application, consider using the [Full Guidance](#) where you'll see explanations and examples for each item.

After writing, demonstrate adherence by completing this checklist:

1. Specify where each item is described (see [Note 1](#)).
2. Cite this checklist (See [Note 2](#)).
3. Include your completed checklist as a supplement when submitting to a journal so that future readers can use it to find information.

|                                                 | Item Description                                                                                                                                                                                                           | Location (or reason for not reporting)                 |
|-------------------------------------------------|----------------------------------------------------------------------------------------------------------------------------------------------------------------------------------------------------------------------------|--------------------------------------------------------|
| <b>Title and abstract</b>                       |                                                                                                                                                                                                                            |                                                        |
| <a href="#">1a. Indicate the study's design</a> | Indicate the study's design with a commonly used term in the title or the abstract.                                                                                                                                        | Abstract                                               |
| <a href="#">1b. Abstract</a>                    | Provide in the abstract an informative and balanced summary of what was done and what was found.                                                                                                                           | Abstract                                               |
| <b>Introduction</b>                             |                                                                                                                                                                                                                            |                                                        |
| <a href="#">2. Background / rationale</a>       | Explain the scientific background and rationale for the investigation being reported.                                                                                                                                      | Introduction, paragraph 3                              |
| <a href="#">3. Objectives</a>                   | State specific objectives, including any prespecified hypotheses.                                                                                                                                                          | Introduction, paragraph 3                              |
| <b>Methods</b>                                  |                                                                                                                                                                                                                            |                                                        |
| <a href="#">4. Study design</a>                 | Present key elements of study design early in the paper.                                                                                                                                                                   | Methods: Patients and Samples                          |
| <a href="#">5. Setting</a>                      | Describe the setting, locations, and relevant dates, including periods of recruitment, exposure, follow-up, and data collection.                                                                                           | Results, paragraph 1;<br>Methods: Patients and Samples |
| <a href="#">6a. Eligibility criteria</a>        | <b>Cohort study:</b> Give the eligibility criteria, and the sources and methods of selection of participants. Describe methods of follow-up. <b>Case-control study:</b> Give the eligibility criteria, and the sources and | Methods: Patients and Samples                          |

|                                                          |                                                                                                                                                                                                                                      |                                   |
|----------------------------------------------------------|--------------------------------------------------------------------------------------------------------------------------------------------------------------------------------------------------------------------------------------|-----------------------------------|
|                                                          | methods of case ascertainment and control selection. Give the rationale for the choice of cases and controls. <b>Cross-sectional study:</b> Give the eligibility criteria, and the sources and methods of selection of participants. |                                   |
| 6b. Matching criteria                                    | <b>Cohort study:</b> For matched studies, give matching criteria and number of exposed and unexposed.<br><b>Case-control study:</b> For matched studies, give matching criteria and the number of controls per case.                 | Not applicable                    |
| 7. Variables                                             | Clearly define all outcomes, exposures, predictors, potential confounders, and effect modifiers. Give diagnostic criteria, if applicable.                                                                                            | Methods: Patients and Samples     |
| 8. Data sources / measurement                            | For each variable of interest give sources of data and details of methods of assessment (measurement). Describe comparability of assessment methods if there is more than one group.                                                 | Methods: Patients and Samples     |
| 9. Bias                                                  | Describe any efforts to address potential sources of bias.                                                                                                                                                                           | Not applicable                    |
| 10. Study size                                           | Explain how the study size was arrived at.                                                                                                                                                                                           | Methods: Patients and Samples     |
| 11. Quantitative variables                               | Explain how quantitative variables were handled in the analyses. If applicable, describe which groupings were chosen, and why.                                                                                                       | Not applicable                    |
| 12a. Statistical methods                                 | Describe all statistical methods, including those used to control for confounding.                                                                                                                                                   | Methods: Statistical analyses     |
| 12b. Statistical methods – subgroups and interactions    | Describe any methods used to examine subgroups and interactions.                                                                                                                                                                     | Not applicable                    |
| 12c. Statistical methods – missing data                  | Explain how missing data were addressed.                                                                                                                                                                                             | Methods: sequencing data analysis |
| 12di. Statistical methods – loss to follow-up            | <b>Cohort study:</b> If applicable, describe how loss to follow-up was addressed.                                                                                                                                                    | Not applicable                    |
| 12dii. Statistical methods – matching cases and controls | <b>Case-control study:</b> If applicable, explain how matching of cases and controls was addressed.                                                                                                                                  | Not applicable                    |
| 12diii. Statistical methods – sampling strategy          | <b>Cross-sectional study:</b> If applicable, describe analytical methods taking account of sampling strategy.                                                                                                                        | Not applicable                    |

|                                                     |                                                                                                                                                                                                                                                                                |                                                                                                                                                 |
|-----------------------------------------------------|--------------------------------------------------------------------------------------------------------------------------------------------------------------------------------------------------------------------------------------------------------------------------------|-------------------------------------------------------------------------------------------------------------------------------------------------|
| 12e. Statistical methods – sensitivity analyses     | Describe any sensitivity analyses.                                                                                                                                                                                                                                             | Not applicable                                                                                                                                  |
| <b>Results</b>                                      |                                                                                                                                                                                                                                                                                |                                                                                                                                                 |
| 13a. Participant numbers                            | Report the numbers of individuals at each stage of the study—e.g., numbers potentially eligible, examined for eligibility, confirmed eligible, included in the study, completing follow-up, and analysed; Consider use of a flow diagram.                                      | Results, paragraph 1                                                                                                                            |
| 13b. Participants – non-participation               | Give reasons for non-participation at each stage.                                                                                                                                                                                                                              | Not applicable                                                                                                                                  |
| 13c. Participants – flow diagram                    | Consider use of a flow diagram.                                                                                                                                                                                                                                                | Not applicable                                                                                                                                  |
| 14a. Descriptive data – participant characteristics | Give characteristics of study participants (e.g., demographic, clinical, social) and information on exposures and potential confounders. Present the information in a table.                                                                                                   | Extended data Table 1                                                                                                                           |
| 14b. Descriptive data – missing data                | Indicate the number of participants with missing data for each variable of interest.                                                                                                                                                                                           | Not applicable                                                                                                                                  |
| 14c. Descriptive data – follow-up time              | <b>Cohort study:</b> Summarise follow-up time—e.g., average and total amount.                                                                                                                                                                                                  | Extended data Table 1                                                                                                                           |
| 15. Outcome data                                    | <b>Cohort study:</b> Report numbers of outcome events or summary measures over time. <b>Case-control study:</b> Report numbers in each exposure category, or summary measures of exposure. <b>Cross-sectional study:</b> Report numbers of outcome events or summary measures. | Extended data Table 1                                                                                                                           |
| 16a. Main results                                   | Give unadjusted estimates and, if applicable, confounder-adjusted estimates and their precision (e.g., 95% confidence intervals). Make clear which confounders were adjusted for and why they were included.                                                                   | Not applicable                                                                                                                                  |
| 16b. Main results – category boundaries             | Report category boundaries when continuous variables were categorised.                                                                                                                                                                                                         | Methods: RNA sequencing analysis, paragraphs 2-3;<br>Methods: Multi-omics workflow for identification of credible driver events, paragraphs 3-5 |
| 16c. Main results – risk                            | If relevant, consider translating estimates of relative risk into absolute risk for a meaningful time period.                                                                                                                                                                  | Not applicable                                                                                                                                  |
| 17. Other analyses                                  | Report other analyses done—e.g., analyses of subgroups and interactions, and sensitivity analyses.                                                                                                                                                                             | Not applicable                                                                                                                                  |
| <b>Discussion</b>                                   |                                                                                                                                                                                                                                                                                |                                                                                                                                                 |

|                          |                                                                                                                                                                  |                           |
|--------------------------|------------------------------------------------------------------------------------------------------------------------------------------------------------------|---------------------------|
| 18. Key results          | Summarise key results with reference to study objectives.                                                                                                        | Discussion, paragraph 1-2 |
| 19. Limitations          | Discuss limitations of the study, taking into account sources of potential bias or imprecision. Discuss both direction and magnitude of any potential bias.      | Discussion, paragraph 5   |
| 20. Interpretation       | Give a cautious overall interpretation considering objectives, limitations, multiplicity of analyses, results from similar studies, and other relevant evidence. | Discussion, paragraph 6   |
| 21. Generalisability     | Discuss the generalisability (external validity) of the study results.                                                                                           | Discussion, paragraph 6   |
| <b>Other information</b> |                                                                                                                                                                  |                           |
| 22. Funding              | Give the source of funding and the role of the funders for the present study and, if applicable, for the original study on which the present article is based.   | Acknowledgements          |
