# Supplementary material
Source: Research Square preprint supplement (doi:10.21203/rs.3.rs-8860995/v1)
Supplement: Supplementary file 3 [file b618d4eadca42e35eb4e8f04.xlsx]

## Sheet: SupplementaryData3
Supplementary data 3. Drug screen results. Percent viability in patient-derived organoids when exposed to single-agent or combination therapy of targeted inhibitors of the RAS-MAPK signaling cascade components (RMC-4550, BI-3406, RMC-7977, Cobimetinib, MK-8353) and other cancer drugs (carboplatin, Saruparib, Navitoclax, Palbociclib, RP6306, Adavosertib, Prexasertib).
Aberration group		KRAS									NF1									Reference
Identifier		EOC1120_pOme1			EOC349_pAsc			EOC540_p2Ome			EOC989_iOme			EOC783_pAsc			EOC823_pAsc			EOC105_rPer2			EOC733_pPer			EOC227_pAsc
Drug		Carboplatin
		0 uM	10 uM	50 uM	0 uM	10 uM	50 uM	0 uM	10 uM	50 uM	0 uM	10 uM	50 uM	0 uM	10 uM	50 uM	0 uM	10 uM	50 uM	0 uM	10 uM	50 uM	0 uM	10 uM	50 uM	0 uM	10 uM	50 uM
			0.4266	0.1046		0.3485	0.1517		0.629956	0.259387		1.0029	0.7955		0.433946	0.189354		0.252857	0.104573		0.650444	0.369942		0.4624			0.444
RMC-4550	100 nM	1.0678	0.4376	0.3233	0.9013	0.4487	0.1466	1.19975	0.370907	0.189055	0.9214	0.873	0.6796	0.855049	0.55744	0.164968	0.863513	0.387599	0.214852	0.997303	0.641802	0.350478	1.118	0.5233		0.8924
	500 nM	1.0803	0.4629	0.1888	0.8738	0.3359	0.2329	1.03229	0.650559	0.287142	0.7553	0.799	0.2985	0.85281	0.516683	0.157295	0.723437	0.122633	0.214712	1.01586	0.718444	0.467339	1.0192	0.7074		1.1589		0.4428
BI-3406	100 nM	1.1068	0.5648	0.2711	0.9385	0.3807	0.1731	1.07796	0.388324	0.211395	0.9363	0.8911	0.7516	0.941479	0.609911	0.0352302	0.879284	0.404874	0.34745	0.991499	0.743184	0.390019	1.0413	0.6082		0.9385	0.5469	0.3441
	500 nM	1.0178	0.3523	0.1649	0.928	0.3419	0.2664	1.13212	0.630359	0.201982	0.9117	0.9405	0.7249	0.798054	0.495405	0.489818	1.06573	0.341633	0.238542	1.00048	0.698436	0.484456	1.0802	0.6232		0.8297	0.5367	0.4468
RMC-7977	40 nM	1.0942	0.5016	0.3466	0.8451	0.4229	0.2266	1.08268	0.634053	0.341744	0.4694	0.4216	0.1573	0.702807	0.336735	0.0182726	0.850668	0.449728	0.315108	1.05321	0.794373	0.457873	1.0397	0.669		1.1031	0.6528	0.3409
	200 nM	1.1986	0.4264	0.2457	0.8504	0.403	0.1357	0.789589	0.513703	0.260407	0.3455	0.2975	0.1422	0.738543	0.678711	0.129645	0.726339	0.401195	0.21513	1.00735	0.76904	0.502233	0.9402	0.6832		1.1939	0.4193	0.3494
Cobimetinib	100 nM	1.0295	0.4007	0.14	0.7771	0.5141	0.2762	1.0114	0.404059	0.203097	0.8295	0.8171	0.3117	0.816174	0.474453	0.0954898	0.967323	0.302228	0.204754	1.01968	0.740227	0.408681	1.1017			0.9441	0.2872	0.4554
	500 nM	0.9814	0.3848	0.2445	0.7876	0.6233	0.2747	1.01671	0.479756	0.154728	0.5858	0.4794	0.17	0.695182	0.508363	0.0771794	0.549441	0.334596	0.314496	1.03274	0.702537	0.501377	0.9852	0.6463		0.886	0.4497	0.2315
MK-8353	100 nM	1.002	0.4433	0.186	0.7416	0.4473	0.2894	0.981806	0.426256	0.166502	0.9813	0.9499	0.7283	0.904817	0.400035	0.0562721			0.175178	1.04903	0.690255	0.350925	1.1039	0.4953		1.0591	0.7228	0.4728
	500 nM	0.9435	0.5076	0.1877	0.7533	0.5488	0.2005	1.10319	0.584956	0.241435	0.8523	0.7812	0.3682	0.661736	0.513919	0.0515349	0.757618	0.299368	0.263218	0.984182	0.660767	0.392811	0.9821	0.8637		1.0863	0.4608	0.2037
		Saruparib
		0 uM	50 nM	250 nM	0 uM	50 nM	250 nM	0 uM	50 nM	250 nM	0 uM	50 nM	250 nM	0 uM	50 nM	250 nM	0 uM	50 nM	250 nM	0 uM	50 nM	250 nM	0 uM	50 nM	250 nM	0 uM	50 nM	250 nM
			1.0269	1.0004		0.9587	0.7958		1.10575	0.98894		1.003	0.9871		0.994157	1.15351		0.950539	0.788251		1.00116	0.969554		0.9161	0.9043		1.0024	1.0668
RMC-4550	100 nM	1.0678	1.1437	0.9299	0.9013	0.6524	0.8098	1.19975	1.14128	1.09976	0.9214	0.8987	0.8668	0.855049	0.774015	0.873355	0.863513	0.77608	0.785233	0.997303	1.03671	0.951148	1.118	0.99	1.0011	0.8924	1.063	0.8917
	500 nM	1.0803	1.1366	1.031	0.8738	0.8986	0.8509	1.03229	0.994057	1.12717	0.7553	0.7069	0.779	0.85281	0.699116	0.788981	0.723437	0.667642	0.599124	1.01586	1.07159	1.07802	1.0192	1.0023	1.0273	1.1589	1.0938	1.0864
BI-3406	100 nM	1.1068	1.0804	1.1008	0.9385	0.9075	0.9633	1.07796	1.15145	1.06078	0.9363	0.9149	0.8564	0.941479	0.773154	0.817331	0.879284	0.949243	0.863208	0.991499	1.00657	0.959378	1.0413	0.9414	1.1641	0.9385	1.146	1.143
	500 nM	1.0178	1.1012	0.9285	0.928	0.9201	0.8702	1.13212	1.15185	0.912154	0.9117	0.8772	0.8803	0.798054	0.962283	1.16176	1.06573	0.965689	0.877913	1.00048	1.00701	1.06165	1.0802	0.9585	1.0274	0.8297	1.0586	1.1549
RMC-7977	40 nM	1.0942	0.9152	0.8781	0.8451	0.9525	0.8657	1.08268	0.976013	0.97964	0.4694	0.435	0.3879	0.702807	0.799764	0.82068	0.850668	0.751742	0.759682	1.05321	1.12453	0.939889	1.0397	1.1209	0.8717	1.1031	1.0895	1.2134
	200 nM	1.1986	0.9693	0.9452	0.8504	0.8179	0.7069	0.789589	0.852747	0.867351	0.3455	0.3863	0.348	0.738543	1.09351	0.832253	0.726339	0.705038	0.561205	1.00735	0.952197	1.04993	0.9402	1.0274	0.9288	1.1939	1.057	1.065
Cobimetinib	100 nM	1.0295	1.0225	0.9545	0.7771	1.0204	0.9096	1.0114	1.12849	1.03748	0.8295	0.7771	0.8112	0.816174	0.965396	0.685231	0.967323	0.63868	0.739042	1.01968	1.02582	1.01236	1.1017	0.9731	1.0481	0.9441	0.8698	0.919
	500 nM	0.9814	1.0176	0.844	0.7876	0.9099	0.7519	1.01671	0.976334	1.05729	0.5858	0.5082	0.582	0.695182	0.843845	0.849231	0.549441	0.557387	0.664311	1.03274	1.06732	1.04231	0.9852	0.8948	1.0236	0.886	1.2537	0.8301
MK-8353	100 nM	1.002	1.2052	1.0311	0.7416	0.829	0.8545	0.981806	1.09422	1.0744	0.9813	0.8846	0.9285	0.904817	0.966451	1.12091			0.961488	1.04903	0.984869	0.953917	1.1039	0.8604	0.9982	1.0591	1.1807	1.2739
	500 nM	0.9435	0.945	0.8944	0.7533	0.6154	0.8112	1.10319	1.10156	1.10944	0.8523	0.782	0.7673	0.661736	0.915997	0.792362	0.757618	0.643822	0.735879	0.984182	0.965903	0.987285	0.9821	1.0224	1.0843	1.0863	1.0215	1.1107
		Navitoclax
		0 uM	100 nM	500 nM	0 uM	100 nM	500 nM	0 uM	100 nM	500 nM	0 uM	100 nM	500 nM	0 uM	100 nM	500 nM	0 uM	100 nM	500 nM	0 uM	100 nM	500 nM	0 uM	100 nM	500 nM	0 uM	100 nM	500 nM
			0.5383	0.2172		0.8204	0.6746		0.657146	0.508436		0.4506	0.3465		0.637692	0.559752		0.829199	0.658438		0.628447	0.307032		0.4153	0.2298		0.7247
RMC-4550	100 nM	1.0678	0.5757	0.2622	0.9013	0.7228	0.6434	1.19975	1.23105	0.42826	0.9214	0.3578	0.1885	0.855049	0.479356	0.575086	0.863513	0.816785	0.476973	0.997303	0.693967	0.364886	1.118	0.4226	0.4228	0.8924	0.7038	0.7078
	500 nM	1.0803	0.5633	0.4379	0.8738	0.5917	0.5505	1.03229	0.612284	0.409263	0.7553	0.2381	0.2374	0.85281	0.424314	0.6271	0.723437	0.48871	0.29429	1.01586	0.695845	0.309742	1.0192	0.6548	0.4178	1.1589	0.8379	0.6786
BI-3406	100 nM	1.1068	0.5372	0.2826	0.9385	0.8384	0.6121	1.07796	0.837841	0.537067	0.9363	0.4076	0.0659	0.941479	0.64069	0.564042	0.879284	0.86992	0.506044	0.991499	0.729374	0.521483	1.0413	0.5105	0.369	0.9385	0.7243	0.4529
	500 nM	1.0178	0.5677	0.608	0.928	0.7341	0.7187	1.13212	0.964924	0.449184	0.9117	0.3847	0.1753	0.798054	0.703405	0.450173	1.06573	0.730668	0.54814	1.00048	0.656839	0.363504	1.0802	0.4754	0.3936	0.8297	0.8588	0.5696
RMC-7977	40 nM	1.0942	0.6473	0.2952	0.8451	0.758	0.5608	1.08268	0.954603	0.44499	0.4694	0.1973	0.2328	0.702807	0.673313	0.25093	0.850668	0.792221	0.265846	1.05321	0.69048	0.275089	1.0397	0.6469	0.5015	1.1031	0.9901	0.4803
	200 nM	1.1986	0.6481	0.306	0.8504	0.8002	0.4965	0.789589	0.746051	0.320484	0.3455	0.1061	0.1953	0.738543	0.393679	0.416573	0.726339	0.544021	0.314765	1.00735	0.628632	0.23542	0.9402	0.8101	0.5775	1.1939	0.9131	0.5042
Cobimetinib	100 nM	1.0295	0.4398	0.2669	0.7771	0.7961	0.5346	1.0114	0.724543	0.489835	0.8295	0.0297	0.2298	0.816174	0.390875	0.200809	0.967323	0.440869	0.292098	1.01968	0.694807	0.279671	1.1017	0.3043	0.4138	0.9441	0.7685	0.3264
	500 nM	0.9814	0.3817	0.1261	0.7876	0.5451	0.4312	1.01671	0.617344	0.43174	0.5858	0.0339	0.151	0.695182	0.412518	0.242852	0.549441	0.453801	0.321762	1.03274	0.613769	0.270957	0.9852	0.5873	0.3146	0.886	0.5685	0.3836
MK-8353	100 nM	1.002	0.6402	0.34	0.7416	0.746	0.6463	0.981806	0.668651	0.567271	0.9813	0.2504	0.0879	0.904817	0.667248	0.569513		0.728778	0.575693	1.04903	0.636789	0.258052	1.1039	0.4708	0.34	1.0591	0.8457	0.6574
	500 nM	0.9435	0.3738	0.1975	0.7533	0.7003	0.3642	1.10319	0.69179	0.477297	0.8523	0.0028	0.1145	0.661736	0.48768	0.367399	0.757618	0.52217	0.276497	0.984182	0.625001	0.305804	0.9821	0.7506	0.4438	1.0863	0.9325	0.6157
		Palbociclib
		0 uM	100 nM	500 nM	0 uM	100 nM	500 nM	0 uM	100 nM	500 nM	0 uM	100 nM	500 nM	0 uM	100 nM	500 nM	0 uM	100 nM	500 nM	0 uM	100 nM	500 nM	0 uM	100 nM	500 nM	0 uM	100 nM	500 nM
			1.2521	1.0565		0.9928	1.0208		0.787187	0.943051		0.9469	0.9193		0.962597	0.769698		0.963872	1.17055		0.879525	0.963707		1.0992	0.9944		0.8793	0.7167
RMC-4550	100 nM	1.0678	0.973	1.0193	0.9013	1.0205	0.8358	1.19975	1.15942	0.936224	0.9214	0.8517	0.8797	0.855049	0.935361	0.691572	0.863513	1.07186	1.13658	0.997303	0.785933	1.0478	1.118	1.1225	1.0681	0.8924	1.0606	0.9955
	500 nM	1.0803	1.0641	1.0086	0.8738	0.7576	0.8242	1.03229	0.774312	1.07713	0.7553	0.6843	0.8368	0.85281	0.650004	1.00353	0.723437	0.708879	0.811448	1.01586	0.949129	1.06458	1.0192	1.137	1.1522	1.1589	0.6888	1.0036
BI-3406	100 nM	1.1068	1.2873	0.9763	0.9385	0.9811	0.9563	1.07796	0.805518	1.17274	0.9363	0.8695	0.8887	0.941479	1.02438	1.10819	0.879284	0.976982	0.956128	0.991499	0.825275	1.05115	1.0413	0.9939	1.0433	0.9385	0.8556	0.9679
	500 nM	1.0178	0.9686	1.11	0.928	0.8964	1.069	1.13212	0.833596	0.883047	0.9117	0.9062	0.8499	0.798054	0.866267	0.943511	1.06573	0.907206	1.00044	1.00048	0.984754	1.08271	1.0802	0.7935	0.9588	0.8297	1.0806	1.3408
RMC-7977	40 nM	1.0942	1.2798	0.9797	0.8451	0.831	0.8475	1.08268	0.921941	1.02687	0.4694	0.3632	0.4087	0.702807	0.736075	0.736725	0.850668	0.700186	0.742359	1.05321	0.980609	1.06085	1.0397	1.0197	0.973	1.1031	0.9483	0.7192
	200 nM	1.1986	1.0188	1.0405	0.8504	0.7369	0.737	0.789589	0.796532	0.931346	0.3455	0.3959	0.3203	0.738543	0.891391	0.816119	0.726339	0.62394	0.961327	1.00735	0.850241	0.921487	0.9402	1.3924	0.9002	1.1939	0.9516	1.1632
Cobimetinib	100 nM	1.0295	1.1476	0.8513	0.7771	0.7827	0.6585	1.0114	0.896655	1.01163	0.8295	0.7432	0.8165	0.816174	0.955486	1.18149	0.967323	0.594497	0.933861	1.01968	0.760048	1.05578	1.1017	1.0199	1.0296	0.9441	0.8429	1.2492
	500 nM	0.9814	0.9613	0.9107	0.7876	0.8558	0.7972	1.01671	0.848276	1.02355	0.5858	0.4529	0.5644	0.695182	0.716976	0.78436	0.549441	0.635379	0.810016	1.03274	0.824002	1.04079	0.9852	0.8807	1.0692	0.886	1.2287	0.8333
MK-8353	100 nM	1.002	1.0317	0.9624	0.7416	0.7853	0.7264	0.981806	0.896179	1.01669	0.9813	0.8434	0.9363	0.904817	0.890312	1.26834		1.10362	1.02239	1.04903	0.84241	1.03375	1.1039	0.9938	0.8255	1.0591	0.7888	0.8976
	500 nM	0.9435	0.8378	1.0284	0.7533	0.7161	0.8253	1.10319	0.947811	0.961231	0.8523	0.7442	0.6805	0.661736	1.04154	1.05414	0.757618	0.825121	0.825446	0.984182	0.817805	0.975667	0.9821	1.1016	0.9691	1.0863	1.0237	0.8148
		RP6306
		0 uM	50 nM	250 nM	0 uM	50 nM	250 nM	0 uM	50 nM	250 nM	0 uM	50 nM	250 nM	0 uM	50 nM	250 nM	0 uM	50 nM	250 nM	0 uM	50 nM	250 nM	0 uM	50 nM	250 nM	0 uM	50 nM	250 nM
			0.9407	0.3237		0.7887	0.6375		0.87054	0.855782		0.8661	0.7927		0.954531	0.586992		0.982699	0.881883		0.909007	0.876236		0.8024	0.3283		0.7615	0.9094
RMC-4550	100 nM	1.0678	0.7969	0.3116	0.9013	0.9052	0.6702	1.19975	0.986124	1.06561	0.9214	0.8576	0.6463	0.855049	0.970734	0.6508	0.863513	0.872256	0.874723	0.997303	0.899582	0.864218	1.118	0.8418	0.3972	0.8924	0.9661	1.0177
	500 nM	1.0803	0.8773	0.267	0.8738	0.8176	0.6424	1.03229	1.13625	1.23294	0.7553	0.7191	0.6825	0.85281	0.768733	0.546169	0.723437	0.886487	0.986847	1.01586	0.987505	0.931826	1.0192	0.9696	0.6301	1.1589	0.8778	0.7313
BI-3406	100 nM	1.1068	0.9574	0.4729	0.9385	0.9542	0.7131	1.07796	1.20903	0.99226	0.9363	0.8621	0.7588	0.941479	0.787773	0.834897	0.879284	0.917696	1.03241	0.991499	1.01166	0.903729	1.0413	0.8918	0.4495	0.9385	0.8013	0.5281
	500 nM	1.0178	0.7709	0.4768	0.928	0.9801	0.5435	1.13212	1.19756	1.17644	0.9117	0.8119	0.7207	0.798054	1.09457	0.547857	1.06573	1.20604	1.09706	1.00048	0.960535	0.895187	1.0802	0.8818	0.4383	0.8297	0.9152	0.9051
RMC-7977	40 nM	1.0942	0.8988	0.5426	0.8451	0.7694	0.6704	1.08268	1.10585	1.17195	0.4694	0.4555	0.4929	0.702807	0.931836	0.411191	0.850668	0.886054	0.933189	1.05321	0.968756	0.955799	1.0397	0.9675	0.7264	1.1031	0.9022	0.7833
	200 nM	1.1986	0.8587	0.4441	0.8504	0.8457	0.7036	0.789589	0.837393	1.01928	0.3455	0.4045	0.4174	0.738543	0.749371	0.42478	0.726339	0.69751	0.743224	1.00735	0.960044	0.920701	0.9402	0.9079	0.7853	1.1939	1.0563	1.0588
Cobimetinib	100 nM	1.0295	0.8219	0.4996	0.7771	0.8795	0.7968	1.0114	0.995768	1.00649	0.8295	0.7882	0.4876	0.816174	0.836593	0.641669	0.967323	0.533364	0.792691	1.01968	0.930825	0.909645	1.1017	0.8484	0.4255	0.9441	1.0959	0.8297
	500 nM	0.9814	0.6727	0.4178	0.7876	0.8274	0.7155	1.01671	0.96843	1.12625	0.5858	0.5315	0.3816	0.695182	0.766845	0.730817	0.549441	0.553387	0.670712	1.03274	0.987859	0.945452	0.9852	0.8846	0.5598	0.886	0.7191	0.6596
MK-8353	100 nM	1.002	0.843	0.4032	0.7416	0.8497	0.6075	0.981806	1.09438	1.1418	0.9813	0.8799	0.759	0.904817	0.658074	0.687934		0.73652	0.729232	1.04903	0.9868	0.970934	1.1039	0.8996	0.622	1.0591	1.1518	1.2782
	500 nM	0.9435	0.7367	0.4692	0.7533	0.6589	0.5094	1.10319	1.06703	1.07208	0.8523	0.7813	0.6212	0.661736	0.692882	0.645474	0.757618	0.68696	0.723841	0.984182	0.886991	0.924349	0.9821	0.9346	0.6282	1.0863	1.0684	0.7367
		Adavosertib
		0 uM	30 nM	150 nM	0 uM	30 nM	150 nM	0 uM	30 nM	150 nM	0 uM	30 nM	150 nM	0 uM	30 nM	150 nM	0 uM	30 nM	150 nM	0 uM	30 nM	150 nM	0 uM	30 nM	150 nM	0 uM	30 nM	150 nM
			0.8533	0.564		0.9767	0.3123		0.91785	0.91658		0.9946	0.7456		0.95201	0.421389		0.917071	0.542173		0.959852	0.869491		0.9021	0.3458			0.3746
RMC-4550	100 nM	1.0678	0.8673	0.5739	0.9013	0.686	0.3681	1.19975	1.26103	1.19706	0.9214	0.7903	0.5733	0.855049	0.731365	0.3547	0.863513	0.677978	0.324683	0.997303	0.966426	0.843027	1.118	1.049	0.4756	0.8924	0.8738	0.7149
	500 nM	1.0803	0.7212	0.4117	0.8738	0.6068	0.2656	1.03229	1.13001	0.954471	0.7553	0.702	0.2968	0.85281	0.612268	0.179118	0.723437	0.611383	0.521383	1.01586	0.981665	0.820443	1.0192	0.9251	0.4457	1.1589	1.0053	0.5787
BI-3406	100 nM	1.1068	1.0042	0.5271	0.9385	0.8498	0.3347	1.07796	1.15773	1.19807	0.9363	0.9037	0.6274	0.941479	1.02391	0.383231	0.879284	0.968825	0.48632	0.991499	1.04139	0.881268	1.0413	1.0048	0.4958	0.9385	1.0228	0.425
	500 nM	1.0178	1.0416	0.4876	0.928	0.8863	0.3693	1.13212	1.08079	1.11854	0.9117	0.867	0.551	0.798054	0.727315	0.134173	1.06573	1.0159	0.543431	1.00048	0.998905	0.86008	1.0802	0.9468	0.4019	0.8297	1	0.4608
RMC-7977	40 nM	1.0942	0.831	0.5151	0.8451	0.8014	0.4385	1.08268	1.06241	0.973871	0.4694	0.4472	0.3285	0.702807	0.51524	0.411119	0.850668	0.861662	0.678719	1.05321	1.03109	0.868096	1.0397	1.0052	0.4205	1.1031	0.9016	0.3924
	200 nM	1.1986	0.872	0.4047	0.8504	0.7185	0.3595	0.789589	1.09275	0.795302	0.3455	0.4112	0.2869	0.738543	0.735134	0.599628	0.726339	0.684355	0.433983	1.00735	1.0228	0.924419	0.9402	0.9367	0.3703	1.1939	0.3898	0.7938
Cobimetinib	100 nM	1.0295	0.9507	0.5268	0.7771	0.6183	0.521	1.0114	1.16265	1.14898	0.8295	0.8035	0.446	0.816174	0.977318	0.244659	0.967323	0.615996	0.483816	1.01968	0.948836	0.922265	1.1017	0.9994	0.5084	0.9441	0.7833	0.5252
	500 nM	0.9814	0.8455	0.497	0.7876	0.6004	0.4308	1.01671	1.07883	0.930293	0.5858	0.5648	0.2872	0.695182	0.614868	0.650322	0.549441	0.435899	0.25707	1.03274	1.00892	0.874198	0.9852	0.9618	0.2771	0.886	0.7043	0.3519
MK-8353	100 nM	1.002	0.8708	0.5771	0.7416	0.968	0.3241	0.981806	1.13937	0.989721	0.9813	0.8978	0.5947	0.904817	0.790375	0.345627		0.851842	0.60776	1.04903	0.971732	0.863787	1.1039	0.9218	0.4163	1.0591	1.0622	0.5107
	500 nM	0.9435	0.9286	0.6164	0.7533	0.6364	0.3098	1.10319	0.934761	1.08068	0.8523	0.7633	0.3928	0.661736	0.725852	0.351974	0.757618	0.683999	0.360132	0.984182	0.967187	0.857407	0.9821	0.9717	0.3446	1.0863	0.8607	0.6748
		Ceralasertib
		0 uM	200 nM	1000 nM	0 uM	200 nM	1000 nM	0 uM	200 nM	1000 nM	0 uM	200 nM	1000 nM	0 uM	200 nM	1000 nM	0 uM	200 nM	1000 nM	0 uM	200 nM	1000 nM	0 uM	200 nM	1000 nM	0 uM	200 nM	1000 nM
			0.971	0.7523		0.7942	0.4627		0.871938	0.752402		1.0071	0.8991		0.84539	0.466733		0.815775	0.554662		0.989778	0.796919		0.7952	0.2428		0.738	0.4516
RMC-4550	100 nM	1.0678	0.9256	0.6116	0.9013	0.7594	0.2734	1.19975	0.914713	0.706314	0.9214	0.8746	0.8354	0.855049	0.8408	0.601054	0.863513	1.01768	0.595296	0.997303	1.04087	0.879746	1.118	1.0612	0.2089	0.8924	0.8918	0.7874
	500 nM	1.0803	0.8954	0.7271	0.8738	0.6984	0.4391	1.03229	0.92033	0.795978	0.7553	0.7849	0.6572	0.85281	0.602372	0.461819	0.723437	0.760889	0.459118	1.01586	0.958546	0.894869	1.0192	1.012	0.2791	1.1589	0.9296	0.4005
BI-3406	100 nM	1.1068	0.9267	0.6356	0.9385	0.7841	0.5321	1.07796	0.93924	0.718651	0.9363	0.9098	0.8683	0.941479	0.644695	0.534665	0.879284	0.914435	0.524677	0.991499	0.992329	0.739858	1.0413	0.9408	0.2361	0.9385	1.0011	0.7308
	500 nM	1.0178	1.0241	0.6193	0.928	0.7563	0.5146	1.13212	0.92679	0.713061	0.9117	0.893	0.8371	0.798054	0.611592	0.304249	1.06573	0.917726	0.717985	1.00048	1.01858	0.886283	1.0802	0.8992	0.1516	0.8297	0.9573	0.6351
RMC-7977	40 nM	1.0942	0.9559	0.8038	0.8451	0.7632	0.4293	1.08268	0.954409	0.682355	0.4694	0.4568	0.5043	0.702807	0.574361	0.552919	0.850668	0.866698	0.690024	1.05321	1.00312	0.872701	1.0397	0.9527	0.2695	1.1031	1.0648	0.6463
	200 nM	1.1986	1.0307	0.6168	0.8504	0.5661	0.4527	0.789589	0.759832	0.849795	0.3455	0.431	0.5211	0.738543	0.564029	0.532122	0.726339	0.662489	0.473812	1.00735	1.01678	0.907563	0.9402	1.0332	0.3212	1.1939	0.9528	0.6067
Cobimetinib	100 nM	1.0295	0.8221	0.5897	0.7771	0.6835	0.4461	1.0114	0.972704	0.690368	0.8295	0.8149	0.7433	0.816174	0.902991	0.376098	0.967323	0.647328	0.449152	1.01968	1.02845	0.784612	1.1017	0.9193	0.1536	0.9441	0.9857	0.712
	500 nM	0.9814	0.7314	0.5019	0.7876	0.7442	0.4305	1.01671	0.842951	0.703458	0.5858	0.5357	0.5919	0.695182	0.477663	0.509502	0.549441	0.423816	0.364121	1.03274	0.982914	0.861661	0.9852	0.9316	0.2729	0.886	0.8054	0.59
MK-8353	100 nM	1.002	0.8553	0.6987	0.7416	0.7517	0.525	0.981806	0.994511	0.838308	0.9813	0.928	0.8621	0.904817	0.701932	0.36044		0.828659	0.664903	1.04903	0.986577	0.85615	1.1039	0.8468	0.2064	1.0591	0.9526	0.5287
	500 nM	0.9435	0.9236	0.6019	0.7533	0.7477	0.4116	1.10319	1.00473	0.811796	0.8523	0.7938	0.737	0.661736	0.536992	0.507962	0.757618	0.701907	0.518944	0.984182	0.95425	0.85877	0.9821	0.8101	0.3626	1.0863	0.9039	0.479
		Prexasertib
		0 uM	10 nM	50 nM	0 uM	10 nM	50 nM	0 uM	10 nM	50 nM	0 uM	10 nM	50 nM	0 uM	10 nM	50 nM	0 uM	10 nM	50 nM	0 uM	10 nM	50 nM	0 uM	10 nM	50 nM	0 uM	10 nM	50 nM
			0.2896	0.2167		0.1816	0.1628		0.490593	0.447908		0.8065	0.6283		0.117769	0.131081		0.247347	0.175041		0.284484	0.194755		0.0407	0.0285		0.2444	0.0817
RMC-4550	100 nM	1.0678	0.281	0.3646	0.9013	0.1834	0.1519	1.19975	0.594578	0.461703	0.9214	0.7433	0.4791	0.855049	0.302464	0.189383	0.863513	0.247151	0.460322	0.997303	0.305672	0.25704	1.118	-0.0912	0.1594	0.8924	0.2906	0.7503
	500 nM	1.0803	0.3878	0.2303	0.8738	0.1993	0.2407	1.03229	0.592292	0.625254	0.7553	0.6395	0.2874	0.85281	0.134914	0.129459	0.723437	0.310703	0.300766	1.01586	0.376506	0.373997	1.0192	0.0515	0.0072	1.1589	0.4431	0.0662
BI-3406	100 nM	1.1068	0.3013	0.3112	0.9385	0.1814	0.0486	1.07796	0.584833	0.551389	0.9363	0.7601	0.3955	0.941479	0.314579	0.605236	0.879284	0.293368	0.276811	0.991499	0.272076	0.246901	1.0413	-0.1167	-0.0776	0.9385	0.4538	0.6422
	500 nM	1.0178	0.3014	0.3793	0.928	0.1304	0.1987	1.13212	0.709193	0.674675	0.9117	0.682	0.4114	0.798054	0.109237	0.398953	1.06573	0.282564	0.375472	1.00048	0.420005	0.349011	1.0802	-0.1726	-0.007	0.8297	0.2979	0.2923
RMC-7977	40 nM	1.0942	0.4432	0.3264	0.8451	0.2281	0.1912	1.08268	0.654854	0.564819	0.4694	0.419	0.3265	0.702807	-0.0674887	0.302449	0.850668	0.219679	0.273057	1.05321	0.49889	0.309586	1.0397	0.088	0.0223	1.1031	0.3684	0.2178
	200 nM	1.1986	0.3946	0.4769	0.8504	0.3141	0.1385	0.789589	0.672744	0.568269	0.3455	0.3372	0.1748	0.738543	0.256025	0.161585	0.726339	0.382507	0.435148	1.00735	0.471339	0.413263	0.9402	0.053	0.0627	1.1939	0.3324	0.4025
Cobimetinib	100 nM	1.0295	0.3004	0.3475	0.7771	0.078	0.1581	1.0114	0.59315	0.466783	0.8295	0.6925	0.4164	0.816174	0.08608	-0.0120142	0.967323	0.388753	0.523401	1.01968	0.435396	0.354708	1.1017	-0.0892	0.0429	0.9441	0.421	0.4456
	500 nM	0.9814	0.4061	0.349	0.7876	0.2198	0.3378	1.01671	0.54182	0.647983	0.5858	0.4543	0.2299	0.695182	0.127003	0.344117	0.549441	0.189794	0.347771	1.03274	0.458364	0.370299	0.9852	0.0167	0.041	0.886	0.3965	0.263
MK-8353	100 nM	1.002	0.3124	0.3073	0.7416	0.2169	0.2347	0.981806	0.678571	0.422571	0.9813	0.7638	0.3587	0.904817	0.284322	0.0206752		0.393891	0.499063	1.04903	0.31951	0.254085	1.1039	-0.0586	-0.0583	1.0591	0.3265	0.233
	500 nM	0.9435	0.3	0.3293	0.7533	0.4138	0.1805	1.10319	0.567938	0.521128	0.8523	0.6442	0.2799	0.661736	0.0616914	0.297778	0.757618	0.29409	0.39325	0.984182	0.440869	0.301015	0.9821	0.0003	-0.0804	1.0863	0.2133	0.2606
